# Supplementary material for: Rapid synthesis of redox-active dodecaborane B12(OR)12clusters under ambient conditions
Source: Royal Society of Chemistry journal article supplement (doi:10.1039/c5qi00263j), 2016-01-01

# Rapid Synthesis of Redox-Active Dodecaborane $B_{12}(OR)_{12}$ Clusters Under Ambient Conditions - SI

Alex I. Wixtrom,<sup>†</sup> Yanwu Shao,<sup>†</sup> Dahee Jung,<sup>†</sup> Charles W. Machan,<sup>‡</sup> Shaunt N. Kevork,<sup>†</sup> Elaine A. Qian,<sup>†</sup> Jonathan C. Axtell,<sup>†</sup> Saeed I. Khan,<sup>†</sup> Clifford P. Kubiak,<sup>‡</sup> Alexander M. Spokoyny<sup>†\*</sup>

<sup>†</sup>Department of Chemistry and Biochemistry, University of California, Los Angeles  
607 Charles E. Young Drive East, Los Angeles, California 90095-1569

<sup>‡</sup>Department of Chemistry and Biochemistry, University of California, San Diego, 9500 Gilman Drive, La Jolla, California 92093-0358

\*E-mail: [spokoyny@chem.ucla.edu](mailto:spokoyny@chem.ucla.edu)

Supporting Information (SI)

## Table of Contents

|                                                                                                            |    |
|------------------------------------------------------------------------------------------------------------|----|
| General considerations.                                                                                    | 3  |
| Materials.                                                                                                 | 3  |
| Instruments.                                                                                               | 3  |
| X-ray data collection and processing parameters.                                                           | 4  |
| Cyclic voltammetry and IRSEC.                                                                              | 4  |
| Microwave Synthesis.                                                                                       | 5  |
| Dicesium Dodecahydroxy- <i>closo</i> -dodecaborate Cs <sub>2</sub> [1].                                    | 6  |
| Dodeca(benzyloxy)- <i>hypercloso</i> -dodecaborane [2]                                                     | 10 |
| Dodeca(allyloxy)- <i>hypercloso</i> -dodecaborane [3]                                                      | 11 |
| Dodeca(ethoxy)- <i>hypercloso</i> -dodecaborane [4]                                                        | 11 |
| Dodeca(hexoxy)- <i>hypercloso</i> -dodecaborane [5]                                                        | 12 |
| Dodeca(6-hexeneoxy)- <i>hypercloso</i> -dodecaborane [6]                                                   | 13 |
| Dodeca(11-undeceneoxy)- <i>hypercloso</i> -dodecaborane [7]                                                | 14 |
| Dodeca(ethylbutyratoxy)- <i>hypercloso</i> -dodecaborane [8]                                               | 15 |
| Dodeca(4-methylbenzyloxy)- <i>hypercloso</i> -dodecaborane [9]                                             | 16 |
| Dodeca(4-bromobenzyloxy)- <i>hypercloso</i> -dodecaborane [10]                                             | 16 |
| Dodeca(4-trifluoromethylbenzyloxy)- <i>hypercloso</i> -dodecaborane [11]                                   | 17 |
| Dodeca(4-nitrobenzyloxy)- <i>hypocloso</i> -dodecaborane [12] <sup>1-</sup>                                | 18 |
| Dodeca(3,5-bis(trifluoromethyl) <sub>2</sub> benzyloxy)- <i>hypocloso</i> -dodecaborane [13] <sup>1-</sup> | 19 |
| Benzyloxy undeca(ethoxy)- <i>hypercloso</i> -dodecaborane [14]                                             | 20 |
| References                                                                                                 | 22 |

## Experimental Section

**General considerations.** Initial microwave synthesis reactions were carried out under an inert atmosphere of nitrogen using standard glovebox techniques. All post-microwave work-up and characterization was performed under ambient conditions. All reactions designated as “open-air” were carried out and worked up under ambient conditions. The “ambient conditions” for this manuscript refer to room temperature (20 - 25 °C) and uncontrolled laboratory air.

**Materials.** Deuterated solvents were purchased from Cambridge Isotope Laboratories and used as received. MilliQ water described in this manuscript refers to purified potable water with a resistivity at 25 °C of  $\leq 18.2 \text{ M}\Omega\cdot\text{cm}$ .  $[\text{NEt}_3\text{H}]_2[\text{B}_{12}\text{H}_{12}]$  was purchased from Boron Specialties (USA). Ethanol (200 proof) was purchased from Decon Labs and used as received.  $\text{FeCl}_3\cdot 6\text{H}_2\text{O}$  ( $\geq 97\%$ ),  $\text{CsOH}\cdot 1\text{H}_2\text{O}$  ( $\geq 99.5\%$ ),  $\text{H}_2\text{O}_2$  (30% in  $\text{H}_2\text{O}$ ),  $[\text{N}^n\text{Bu}_4]\text{OH}$  (40% in  $\text{H}_2\text{O}$ ), bromoethane ( $\geq 99\%$ ), 6-bromo-1-hexane (98%) allyl bromide (99%), 4-nitrobenzyl bromide (99%), acetonitrile ( $\geq 99.9\%$ ),  $\text{CH}_2\text{Cl}_2$  ( $\geq 99.5\%$ ), ethyl acetate ( $\geq 99.5\%$ ), hexanes ( $\geq 98.5\%$ ), methanol ( $\geq 99.8\%$ ), *N,N*-diisopropylethylamine ( $\geq 99\%$ ), and tetrabutylammonium hexafluorophosphate ( $\geq 99.0\%$ , electrochemical grade and 98%, recrystallized from ethanol and dried under vacuum at 90 °C) were purchased from Sigma-Aldrich. Benzyl bromide (99%) and ethyl 4-bromobutyrate (98%) were purchased from Alfa Aesar, and 4-methylbenzyl bromide (98%) was purchased from Acros. 6-bromo-1-hexene (98%), undec-10-enyl bromide (95%), 4-trifluoromethylbenzyl bromide (99%), and 3,5-bis( $\text{CF}_3$ )<sub>2</sub>-benzyl bromide (97%) were purchased from Oakwood. All reagents were used as received unless otherwise indicated.

**Instruments.** Bruker AV400 and AV500 spectrometers were used to obtain  $^{11}\text{B}$ ,  $^{13}\text{C}\{^1\text{H}\}$ ,  $^1\text{H}$ , and  $^{19}\text{F}$  NMR spectra and Bruker Topspin software was used to process the NMR data.  $^{13}\text{C}\{^1\text{H}\}$  and

$^1\text{H}$  NMR spectra were referenced to residual solvent resonances in deuterated solvents (due to high humidity  $\text{H}_2\text{O}$  resonances are often present).  $^{11}\text{B}$  and  $^{19}\text{F}$  NMR spectra were referenced to  $\text{BF}_3\cdot\text{Et}_2\text{O}$  and  $\text{CFCl}_3$  standards, respectively. A Bruker EMX EPR spectrometer was used to acquire EPR spectra, with all spectra collected in  $\text{CH}_2\text{Cl}_2$  at ambient temperature. Mass spectrometry data was acquired using a Thermo Scientific<sup>TM</sup> Q-Exactive<sup>TM</sup> Plus instrument with a quadrupole mass filter and Orbitrap mass analyzer (compounds 2-13), and a Thermo Instruments Exactive Plus with IonSense ID-CUBE DART source instrument for compound 14. IR spectroscopy was acquired on solid samples using a PerkinElmer Spectrum Two FT-IR spectrometer equipped with a diamond universal ATR probe. X-ray photoelectron spectroscopy (XPS) data was acquired using an AXIS Ultra DLD instrument (Kratos Analytical Inc., Chestnut Ridge, NY, USA) with a monochromatic  $\text{Al K}\alpha$  X-ray source (10 mA for survey and high-resolution scans). A 300 x 700 nm oval spot size and ultrahigh vacuum ( $10^{-9}$  Torr) were used, with 160 eV pass energy for survey spectra and 20 eV for high-resolution spectra of B 1s using a 200 ms dwell time and 20 scans. All XPS peaks were externally referenced to the C 1s signal at 284.6 eV. The experimental setup and design of the infrared-spectroelectrochemistry (IR-SEC) cell has been published previously.<sup>1,2</sup>

**X-ray data collection and processing parameters.** For [11] and [13]<sup>1-</sup>, a single crystal was mounted on a nylon loop using perfluoropolyether oil and cooled rapidly to 100 K with a stream of cold dinitrogen. Diffraction data were measured using a Bruker APEX-II CCD diffractometer using  $\text{Mo-K}\alpha$  radiation. The cell refinement and data reduction were carried out using Bruker SAINT and the structure was solved with SHELXS-97. All subsequent crystallographic calculations were performed using SHELXL-2013.

**Cyclic voltammetry and IRSEC.** Cyclic voltammetry was performed on [11] and [14] using a CH Instruments CHI630D potentiostat with a glassy carbon disc working electrode, platinum wire



counter electrode, and Ag/Ag<sup>+</sup> wire pseudoreference. All experiments were conducted in 0.1M [N<sup>n</sup>Bu<sub>4</sub>]PF<sub>6</sub>/CH<sub>2</sub>Cl<sub>2</sub> with 0.5 mM analyte concentrations (11.2 mg in 10 mL for [11] and 3.7 mg in 10 mL for [14]). The CH<sub>2</sub>Cl<sub>2</sub> was dried in house with a custom drying system running through two alumina columns prior to use. The solution was degassed by bubbling Ar, and the cyclic voltammetry was performed under Ar gas. For [11], a scan rate of 0.1 mV/s was used with Fc/Fc<sup>+</sup> as an external standard. For [14], a scan rate of 0.5 mV/s was used with Fc/Fc<sup>+</sup> as an internal standard.

IRSEC and cyclic voltammetry for [13] were performed using a Pine Instrument Company model AFCBP1 bipotentiostat and BAS Epsilon potentiostat, respectively. For IR-SEC, as the potential was scanned, thin-layer bulk electrolysis was monitored by Fourier-Transform Reflectance IR off the electrode surface. All experiments were conducted in 0.1 M [N<sup>n</sup>Bu<sub>4</sub>]PF<sub>6</sub>/CH<sub>2</sub>Cl<sub>2</sub> solutions with analyte concentrations of ~5 mM (13.9 mg in 1 mL) prepared under a nitrogen atmosphere. The IR-SEC cell used a glassy carbon working electrode, Pt wire counter electrode, and Ag wire pseudoreference electrode. The anionic [N<sup>n</sup>Bu<sub>4</sub>]<sub>2</sub>[13]<sup>2-</sup> was used for IRSEC, starting at resting potential and increasing to more oxidizing potentials stepwise.

**Microwave Synthesis.** Microwave reactions were performed using a CEM Discover SP microwave synthesis reactor. Except where noted otherwise, all reactions were performed in glass 10 mL microwave reactor vials purchased from CEM with silicone/PTFE caps. Flea micro PTFE-coated stir bars were used in the vials with magnetic stirring set to high and 15 seconds of premixing prior to the temperature ramping. All microwave reactions were carried out at 140 °C with the pressure release limit set to 250 psi (no reactions exceeded this limit to trigger venting) and the maximum wattage set to 250W (the power applied was dynamically controlled by the microwave instrument and did not exceed this limit for any reactions). Column chromatography

was performed using 2.0 - 2.25 cm inner diameter glass fritted chromatography columns with 20-30 cm of slurry-packed silica gel to ensure full separation of reagents and products. Unfiltered pressurized air was used to assist column chromatography.

### **Dicesium Dodecahydroxy-*closo*-dodecaborate Cs<sub>2</sub>[1].**

CsOH·H<sub>2</sub>O (14.00 g, 83.4 mmol) was dissolved in methanol (130 mL) in a 300 mL glass round bottom flask. [NEt<sub>3</sub>H]<sub>2</sub>[B<sub>12</sub>H<sub>12</sub>] (13.3758 g, 38.9 mmol) was added along with a PTFE-coated stir bar, and the reaction was left to stir vigorously for 18 h at ambient temperature. The cloudy suspension was then filtered through a 60 mL fritted glass funnel and washed with methanol (3 x 20 mL). The resulting white solid was dried on the frit for 1.5 h then left under high vacuum for 12 h and complete conversion to Cs<sub>2</sub>[*closo*-B<sub>12</sub>H<sub>12</sub>] was confirmed by the absence of amine resonances in the <sup>1</sup>H NMR spectrum. Alternatively, commercially-obtained Cs<sub>2</sub>[B<sub>12</sub>H<sub>12</sub>] (98%, Strem) can be utilized for hydroxylation.

*Note: The perhydroxylation procedure described herein should always be undertaken with caution and careful planning in order to ensure the Cs<sub>2</sub>[B<sub>12</sub>H<sub>12</sub>] reagent is pure and contains no organic contaminants. Blast shielding to contain any possible explosions should be utilized. Under no circumstances should the hydrogen peroxide used in the reaction come into contact with any organic material or solvents due to the possibility of an explosion. Synthesis of Cs<sub>2</sub>[B<sub>12</sub>(OH)<sub>12</sub>] and the ion exchange to produce [N<sup>n</sup>Bu<sub>4</sub>]<sub>2</sub>[B<sub>12</sub>(OH)<sub>12</sub>] have been described elsewhere,<sup>3,4</sup> but will be reported here for convenience. Cs<sub>2</sub>[B<sub>12</sub>H<sub>12</sub>] (15.0 g, 36.8 mmol) was added to a glass three-necked round bottom flask with a water-cooled condensing coil in the top slot. The rear neck outlet contained a stopcock for venting pressure, and the front outlet was sealed with a glass stopper and secured with a plastic Keck clip. The apparatus was suspended in a silicone oil bath on a hot plate and secured, with a blast shield in front as a precaution against any potential explosion. The oil*

bath was heated to 95 °C, and a 50 mm oval PTFE stir bar was added to the flask, and the reaction was initiated with the addition of H<sub>2</sub>O<sub>2</sub> (50 mL, 30% in H<sub>2</sub>O). The flask was stoppered and the mixture allowed to stir at that temperature for 2 h. After 2 h, additional H<sub>2</sub>O<sub>2</sub> (12 mL) was added, with the flask being vented, the glass stopper removed, and upon completion of addition, re-stoppering the flask. This addition of H<sub>2</sub>O<sub>2</sub> was repeated every 2 h until a total volume of 60 mL was added to the reaction mixture. Upon completion of the addition, the oil bath temperature was increased to 105 °C, and additional H<sub>2</sub>O<sub>2</sub> aliquots (10-15 mL) were added every 2 - 3 days, cooling the solution in the flask by raising it out of the oil bath and leaving it to cool for 20 – 30 minutes prior to each addition. After 14 days, the progress of the reaction was assessed *via* <sup>11</sup>B NMR, with reaction completion indicated by the appearance of a broad resonance at -18.0 ppm corresponding to Cs<sub>2</sub>[B<sub>12</sub>(OH)<sub>12</sub>] and the disappearance of the resonance at -16 ppm corresponding to unreacted Cs<sub>2</sub>[B<sub>12</sub>H<sub>12</sub>]. Once the reaction is complete (as assessed by <sup>11</sup>B NMR), the mixture was cooled to 2 – 8 °C and cold MilliQ water was used to transfer the solution and solid product to a 150 mL glass fritted filter funnel. The crude product was washed with additional MilliQ water prior to drying on the filter frit under water-aspirator vacuum for 6 – 12 hours. Yield: 18.8 g (85 %).

*From this point, N<sup>n</sup>Bu<sub>4</sub> will be referred to as TBA.* For the cation exchange, Dowex 50X8 (100-200 mesh, hydrogen form, Sigma-Aldrich) was washed with MilliQ water in a 500 mL glass beaker until neutral (decanting and discarding the wash fractions), and [TBA]OH (40% in H<sub>2</sub>O) was added in 10 mL increments until basic with magnetic stirring using a 50 mm PTFE coated standard stir bar. After 30 minutes, the pH was assessed again, and if no longer basic, additional [TBA]OH was added to restore basicity and left to stir overnight covered with a watch glass. The resin was slurry-packed into a 5 x 30 cm column wrapped with heating tape (controller set to hold temperature at 50 °C), and washed with MilliQ water until neutral. Cs<sub>2</sub>[B<sub>12</sub>(OH)<sub>12</sub>] (5.996 g,

10.0 mmol) was dissolved in boiling water (600 mL), cooled to 50 °C and slowly added to column. The product was washed with an additional 750 mL of 50 °C water, and the product was concentrated *in vacuo* and lyophilized to produce pure TBA<sub>2</sub>[**1**]. Yield: 6.90 g (85 %). TBA<sub>2</sub>[**1**] is a white solid. <sup>1</sup>H NMR (500 MHz, CDCl<sub>3</sub>): δ 4.66 (s, 12H, OH), 3.08 (m, 8H, N-CH<sub>2</sub>), 1.54 (m, 8H, N-CH<sub>2</sub>CH<sub>2</sub>), 1.25 (m, 8H, N-(CH<sub>2</sub>)<sub>2</sub>CH<sub>2</sub>), 0.84 (m, 12H, N-(CH<sub>2</sub>)<sub>3</sub>CH<sub>3</sub>). <sup>11</sup>B{<sup>1</sup>H} NMR (128 MHz, D<sub>2</sub>O): δ -17.9. *Note: TBA<sub>2</sub>[1] is air-stable, but hygroscopic. Store under inert atmosphere or in a sealed desiccator to prevent excess absorption of water over extended periods of time under storage.*

### **General ether alkylation/benylation of TBA<sub>2</sub>[1] to B<sub>12</sub>(OR)<sub>12</sub> microwave procedure**

Reactions were performed using TBA<sub>2</sub>[**1**] which was weighed and placed into a 10 mL glass microwave vial and transferred out of a nitrogen-filled glovebox, being opened to the air prior to synthesis. The acetonitrile solvent, base, and alkyl reagents were all used under ambient temperature and pressure conditions with no additional purification or drying. *Note: the initial inert-atmosphere trials mentioned in the main text for 2, 3, and 4 were prepared inside a nitrogen-filled glovebox using rigorously anhydrous solvent. Once the PTFE/silicone cap was placed on the microwave vial it was transferred out of the glovebox and the reactions were performed identically to the open-air reactions.* TBA<sub>2</sub>[**1**] (50.0 mg, 0.061 mmol) was transferred to a 10 mL glass microwave vial containing a flea micro stir bar and dissolved in acetonitrile (1 mL). *N,N*-diisopropylethylamine (Hünig's base, 0.2 mL, 1.15 mmol) and alkyl halide (7.6 mmol) were added, and a PTFE/silicone cap was placed on the microwave vial. The mixture was heated to 140 °C with stirring in the microwave for 5 min to 8 hrs (depending upon the alkyl halide), with the progress of the reaction monitored *via* <sup>11</sup>B NMR spectroscopy. Multiple resonances between -14 and -16 ppm are first observed, indicating partial substitution of the 12 vertices. The reaction has

reached completion when these resonances coalesce to a broad singlet resonance between -14 and -16 ppm corresponding to the fully substituted  $[\text{B}_{12}(\text{OR})_{12}]^{2-}$  species. The color of the reaction mixture is typically a faint yellow initially, with the completed reaction mixture changing to a pink/purple, faint pink, or deep red/orange color indicative of the 1- species. Upon completion of the reaction, excess acetonitrile and base were removed *via* rotary evaporation. With the exception of **3**, **4**, **6**, and **14** the remaining reaction mixture containing product and unreacted alkyl halide were separated *via* column chromatography with silica gel. The unreacted alkyl halide (clear and colorless or slightly yellow/orange, UV active) was eluted first, followed by the elution of the remaining pink/purple product mixture consisting of 1-/2- species (note that the 2- species is colorless). The excess solvent was removed *via* a rotary evaporator, and the remaining 1-/2- product mixture was dissolved in a 90/5/5 ethanol/acetonitrile/MilliQ H<sub>2</sub>O or 90/10 ethanol/acetonitrile mixture and transferred to a 50 mL round bottom flask. FeCl<sub>3</sub>·6H<sub>2</sub>O (0.3 g, 1.11 mmol) was added to the dissolved mixture, and subsequently stirred vigorously for 12-24 h at ambient temperature. The solvent was removed from the resulting dark orange/brown mixture *via* rotary evaporation, and the neutral [*hypercloso*-B<sub>12</sub>(OR)<sub>12</sub>]<sup>0</sup> or radical TBA[*hypocloso*-B<sub>12</sub>(OR)<sub>12</sub>]<sup>1-</sup> product was separated from the FeCl<sub>3</sub>·6H<sub>2</sub>O *via* column chromatography with silica gel. A dark orange, yellow-orange, or red-orange band consisting of neutral [*hypercloso*-B<sub>12</sub>(OR)<sub>12</sub>]<sup>0</sup> was eluted with CH<sub>2</sub>Cl<sub>2</sub>, with a pink/purple band containing charged 1-/2- species eluting next if any product was not fully oxidized. The red or orange fraction containing the desired neutral closoomer was dried with rotary evaporation followed by high vacuum, and the above procedure for oxidation could be repeated on the remaining 1-/2- mixture to obtain additional neutral product if any non-fully oxidized product remains. *Note: if the final oxidized product*

appears to have any impurities (via  $^1\text{H}$  NMR spectroscopy), eluting the product through an additional silica plug or short column with 1:1  $\text{CH}_2\text{Cl}_2$ /hexanes should remove any contaminants.

### **Dodeca(benzyloxy)-hypercloso-dodecaborane [2]**

TBA<sub>2</sub>[1] (50.0 mg, 0.061 mmol) was added to a 10 mL glass microwave vial and transferred out of a nitrogen filled glovebox, opened to the air, and dissolved in 1 mL acetonitrile. *N,N*-diisopropylethylamine (0.2 mL, 1.15 mmol) and benzyl bromide (1.74 mL, 14.7 mmol) were added along with a flea micro stir bar, the vial was sealed with a PTFE/silicone cap, and the mixture was heated at 140 °C with stirring in the microwave for 15 min. The volatiles were removed *via* rotary evaporation, and the excess reagent was eluted through a slurry-packed silica gel column with 65/35 hexanes/ethyl acetate, and the pink/purple product mixture was eluted with  $\text{CH}_2\text{Cl}_2$ . The  $\text{CH}_2\text{Cl}_2$  was removed *via* rotary evaporation, the remaining charged 1-/2- product mixture was dissolved in 5 mL 90/5/5 ethanol/acetonitrile/ $\text{H}_2\text{O}$ ,  $\text{FeCl}_3 \cdot 6\text{H}_2\text{O}$  (0.3 g, 1.11 mmol) was added and the mixture was left to stir for 12-24 h. Following oxidation, the solvent mixture was removed *via* rotary evaporation, and an orange band containing the neutral product was separated from the  $\text{FeCl}_3 \cdot 6\text{H}_2\text{O}$  through a slurry-packed silica gel column with  $\text{CH}_2\text{Cl}_2$ . The  $\text{CH}_2\text{Cl}_2$  was removed *via* rotary evaporation and the final neutral product **2** was dried under high vacuum to obtain an isolated yield of 54.3 mg (63%). Compound **2** is a dark orange solid.  $^1\text{H}$  NMR (500 MHz,  $\text{CDCl}_3$ ):  $\delta$  7.08 - 7.19 (m, 60H,  $\text{C}_6\text{H}_5$ ), 5.25 (s, 24H, O- $\text{CH}_2$ ).  $^{13}\text{C}\{^1\text{H}\}$  NMR (125 MHz,  $\text{CDCl}_3$ ):  $\delta$  140.8, 128.4, 127.3, 73.4.  $^{11}\text{B}\{^1\text{H}\}$  NMR (128 MHz,  $\text{CDCl}_3$ ):  $\delta$  41.8. HRMS (Orbitrap): *m/z* calculated for  $\text{C}_{84}\text{H}_{84}\text{B}_{12}\text{O}_{12}$  ( $\text{M}^-$ ), 1414.7152 Da; found, 1414.7183 Da.

### **Dodeca(allyloxy)-hypercloso-dodecaborane [3]**

*Note: this reaction should be performed with minimal exposure to light.* TBA<sub>2</sub>[1] (100.0 mg, 0.122 mmol) was added to a 10 mL glass microwave vial and transferred out of a nitrogen filled glovebox, opened to the air, and dissolved in 2 mL acetonitrile. *N,N*-diisopropylethylamine (0.4 mL, 2.30 mmol) and allyl bromide (1.28 mL, 14.68 mmol) were added along with a flea micro stir bar, the vial was sealed with a PTFE/silicone cap, and the mixture was heated at 140 °C with stirring in the microwave for 15 min. The volatiles and excess reagent were removed *via* rotary evaporation and the purple 1-/2- product mixture was dissolved in 5 mL 90/10 ethanol/acetonitrile, FeCl<sub>3</sub>·6H<sub>2</sub>O (0.3 g, 1.11 mmol) was added and the mixture was left to stir for 12-24 h (wrapped in foil to avoid excessive light exposure). Following oxidation, the solvent mixture was removed *via* rotary evaporation, and a yellow band containing the neutral product was separated from the FeCl<sub>3</sub>·6H<sub>2</sub>O through a slurry-packed silica gel column with CH<sub>2</sub>Cl<sub>2</sub>. The CH<sub>2</sub>Cl<sub>2</sub> was removed *via* rotary evaporation and the final neutral product **3** was dried under high vacuum to obtain an isolated yield of 76.8 mg (77%). Compound **3** is a dark yellow-orange viscous oil. <sup>1</sup>H NMR (500 MHz, CDCl<sub>3</sub>): δ 5.91 – 5.99 (m, 12H, CH), 5.21 (dq, 12H, CH), 5.05 (dq, 12H, CH), 4.62 (m, 24H, O-CH<sub>2</sub>). <sup>13</sup>C{<sup>1</sup>H} NMR (125 MHz, CDCl<sub>3</sub>): δ 136.9, 114.2, 71.6. <sup>11</sup>B{<sup>1</sup>H} NMR (128 MHz, CDCl<sub>3</sub>): δ 41.1. HRMS (Orbitrap): *m/z* calculated for C<sub>36</sub>H<sub>60</sub>B<sub>12</sub>O<sub>12</sub> (M<sup>+</sup>), 814.5274 Da; found, 814.5333 Da. *Note: Compound 3 should be stored at -20 °C or used immediately.*

### **Dodeca(ethoxy)-hypercloso-dodecaborane [4]**

TBA<sub>2</sub>[1] (50.0 mg, 0.061 mmol) was added to a 10 mL glass microwave vial and transferred out of a nitrogen filled glovebox, opened to the air, and dissolved in 1 mL acetonitrile. *N,N*-diisopropylethylamine (0.2 mL, 1.15 mmol) and bromoethane (1.65 mL, 22.1 mmol) were added along with a flea micro stir bar, the vial was sealed with a PTFE/silicone cap, and the mixture was

heated at 140 °C with stirring in the microwave for 30 min. The volatiles and excess reagent were removed *via* rotary evaporation, the remaining charged 1-/2- product mixture was dissolved in 4 mL 90/5/5 ethanol/acetonitrile/H<sub>2</sub>O, FeCl<sub>3</sub>·6H<sub>2</sub>O (0.3 g, 1.11 mmol) was added and the mixture was left to stir for 12-24 h. Following oxidation, the solvent mixture was removed *via* rotary evaporation, and an orange band containing the neutral product was separated from the FeCl<sub>3</sub>·6H<sub>2</sub>O through a slurry-packed silica gel column with CH<sub>2</sub>Cl<sub>2</sub>. The CH<sub>2</sub>Cl<sub>2</sub> was removed *via* rotary evaporation and the final neutral product **4** was dried under high vacuum to obtain an isolated yield of 32.7 mg (80%). Compound **4** is a dark orange solid. <sup>1</sup>H NMR (500 MHz, CDCl<sub>3</sub>): δ 4.09 (q, 24H, O-CH<sub>2</sub>), 1.24 (t, 36H, CH<sub>3</sub>). <sup>13</sup>C{<sup>1</sup>H} NMR (125 MHz, CDCl<sub>3</sub>): δ 66.8, 17.8. <sup>11</sup>B{<sup>1</sup>H} NMR (128 MHz, CDCl<sub>3</sub>): δ 37.7. HRMS (Orbitrap): *m/z* calculated for C<sub>24</sub>H<sub>60</sub>B<sub>12</sub>O<sub>12</sub> (M<sup>+</sup>), 670.5274 Da; found, 670.5278 Da.

#### **Dodeca(hexoxy)-*hypercloso*-dodecaborane [5]**

TBA<sub>2</sub>[**1**] (99.0 mg, 0.121 mmol) was added to a 10 mL glass microwave vial and transferred out of a nitrogen filled glovebox, opened to the air, and dissolved in 2 mL acetonitrile. *N,N*-diisopropylethylamine (0.4 mL, 2.30 mmol) and 6-bromo-1-hexane (2.85 mL, 20.3 mmol) were added along with a stir bar, the vial was sealed with a PTFE/silicone cap, and the mixture was heated at 140 °C with stirring in the microwave for 2 h. The volatiles were removed *via* rotary evaporation at 65 °C, the remaining charged 1-/2- product mixture was dissolved in 5 mL 90/5/5 ethanol/acetonitrile/H<sub>2</sub>O, FeCl<sub>3</sub>·6H<sub>2</sub>O (0.3 g, 1.11 mmol) was added and the mixture was left to stir for 12-24 h. Following oxidation, the solvent mixture was removed *via* rotary evaporation, and an orange band containing the neutral product was separated from the FeCl<sub>3</sub>·6H<sub>2</sub>O through a slurry-packed silica gel column with CH<sub>2</sub>Cl<sub>2</sub>. The CH<sub>2</sub>Cl<sub>2</sub> was removed *via* rotary evaporation and the final neutral product **5** was dried under high vacuum to obtain an isolated yield of 91.4 mg



(56%). Compound **5** is a dark yellow-orange oil.  $^1\text{H}$  NMR (400 MHz,  $\text{CDCl}_3$ ):  $\delta$  4.02 (t, 24H, O-CH<sub>2</sub>), 1.54 (m, 24H, CH<sub>2</sub>CH<sub>2</sub>(CH<sub>2</sub>)<sub>3</sub>CH<sub>3</sub>), 1.31, (m, 72H, CH<sub>2</sub>CH<sub>2</sub>(CH<sub>2</sub>)<sub>3</sub>CH<sub>3</sub>), 0.89 (m, 36H, CH<sub>3</sub>).  $^{13}\text{C}\{^1\text{H}\}$  NMR (125 MHz,  $\text{CDCl}_3$ ):  $\delta$  70.2, 32.2, 31.8, 25.9, 22.8, 14.1.  $^{11}\text{B}\{^1\text{H}\}$  NMR (128 MHz,  $\text{CDCl}_3$ ):  $\delta$  42.0. HRMS (Orbitrap):  $m/z$  calculated for  $\text{C}_{72}\text{H}_{156}\text{B}_{12}\text{O}_{12}$  ( $\text{M}^-$ ), 1343.2786 Da; found, 1343.2838 Da.

### **Dodeca(6-hexeneoxy)-hypercloso-dodecaborane [6]**

*Note: this reaction should be performed with minimal exposure to light.* TBA<sub>2</sub>[**1**] 50.0 mg (0.061 mmol) was added to a 10 mL glass microwave vial and transferred out of a nitrogen filled glovebox, opened to the air, and dissolved in 1 mL acetonitrile. *N,N*-diisopropylethylamine (0.2 mL, 1.15 mmol) and 6-bromo-1-hexene (0.59 mL, 4.41 mmol) were added along with a stir bar, the vial was sealed with a PTFE/silicone cap, and the mixture was heated at 140 °C with stirring in the microwave for 7 h. The volatiles and excess reagent were removed *via* rotary evaporation, and the remaining charged 1-/2- product mixture was dissolved in 5 mL 90/10 ethanol/acetonitrile,  $\text{FeCl}_3 \cdot 6\text{H}_2\text{O}$  (0.3 g, 1.11 mmol) was added and the mixture was left to stir for 12-24 h. Following oxidation, the solvent mixture was removed *via* rotary evaporation, and an orange band containing the neutral product was separated from the  $\text{FeCl}_3 \cdot 6\text{H}_2\text{O}$  through a slurry-packed silica gel column with  $\text{CH}_2\text{Cl}_2$ . The  $\text{CH}_2\text{Cl}_2$  was removed *via* rotary evaporation and the final neutral product **6** was dried under high vacuum to obtain an isolated yield of 35.0 mg (43%). Compound **6** is a dark yellow-orange oil.  $^1\text{H}$  NMR (400 MHz,  $\text{CDCl}_3$ ):  $\delta$  5.79 (m, 12H, CH), 4.95 (m, 24H, CH<sub>2</sub>CH), 4.02 (t, 24H, O-CH<sub>2</sub>), 2.05 (q, 24H, (CH<sub>2</sub>)<sub>3</sub>CH<sub>2</sub>CH<sub>2</sub>CH), 1.56 (m, 24H, CH<sub>2</sub>CH<sub>2</sub>(CH<sub>2</sub>)<sub>3</sub>CH), 1.43 (m, 24H, (CH<sub>2</sub>)<sub>2</sub>CH<sub>2</sub>(CH<sub>2</sub>)<sub>2</sub>CH).  $^{13}\text{C}\{^1\text{H}\}$  NMR (125 MHz,  $\text{CDCl}_3$ ):  $\delta$  139.1, 114.2, 70.1, 33.6, 31.7, 25.5.  $^{11}\text{B}\{^1\text{H}\}$  NMR (128 MHz,  $\text{CDCl}_3$ ):  $\delta$  41.6. HRMS (Orbitrap):  $m/z$  calculated for  $\text{C}_{72}\text{H}_{132}\text{B}_{12}\text{O}_{12}$  ( $\text{M}$ ), 1319.0908 Da; found, 1319.1003 Da.

## Dodeca(11-undeceneoxy)-*hypercloso*-dodecaborane [7]

*Note: this reaction should be performed with minimal exposure to light.* TBA<sub>2</sub>[1] (50.0 mg, 0.061 mmol) was added to a 10 mL glass microwave vial and transferred out of a nitrogen filled glovebox, opened to the air, and dissolved in 1 mL acetonitrile. *N,N*-diisopropylethylamine (0.2 mL, 1.15 mmol) and undec-10-enyl bromide (1.54 mL, 7.33 mmol) were added along with a stir bar, the vial was sealed with a PTFE/silicone cap, and the mixture was reacted at 140 °C with stirring in the microwave for 8 h. The volatiles were removed *via* rotary evaporation, the excess reagent was eluted through a slurry-packed silica gel column with hexanes, and the product mixture yellow-orange and red-orange fractions were eluted with CH<sub>2</sub>Cl<sub>2</sub> followed by a pink fraction with ethyl acetate. The CH<sub>2</sub>Cl<sub>2</sub>/ethyl acetate was removed *via* rotary evaporation, the remaining charged 1-/2- product mixture was dissolved in 9 mL 49/49/2 ethanol/CH<sub>2</sub>Cl<sub>2</sub>/acetonitrile, FeCl<sub>3</sub>·6H<sub>2</sub>O (0.5 g, 1.85 mmol) was added and the mixture was left to stir for 12-24 h. Following oxidation, the solvent mixture was removed *via* rotary evaporation, and a dark brown/black band containing the neutral product was separated from the FeCl<sub>3</sub>·6H<sub>2</sub>O through a slurry-packed silica gel column with CH<sub>2</sub>Cl<sub>2</sub>. The CH<sub>2</sub>Cl<sub>2</sub> was removed *via* rotary evaporation and the final neutral product **7** was dried under high vacuum to obtain an isolated yield of 37.1 mg (28%). Compound **7** is a dark, brown/black oil. <sup>1</sup>H NMR (400 MHz, CD<sub>2</sub>Cl<sub>2</sub>): δ 5.81 (m, 12H, CH), 4.98 (m, 12H, *trans*-CH<sub>2</sub>CH), 4.91 (m, 12H, *cis*-CH<sub>2</sub>CH), 4.01 (t, 24H, O-CH<sub>2</sub>), 2.03 (m, 24H, O-CH<sub>2</sub>CH<sub>2</sub>), 1.54 (m, 24H, O-(CH<sub>2</sub>)<sub>2</sub>CH<sub>2</sub>), 1.32 (m, 144H, O-(CH<sub>2</sub>)<sub>3</sub>(CH<sub>2</sub>)<sub>6</sub>CH<sub>2</sub>CH). <sup>13</sup>C{<sup>1</sup>H} NMR (125 MHz, CD<sub>2</sub>Cl<sub>2</sub>): δ 139.3, 113.8, 70.4, 33.9, 32.3, 29.9, 29.7, 29.6, 29.3, 29.1, 26.2. <sup>11</sup>B{<sup>1</sup>H} NMR (128 MHz, CD<sub>2</sub>Cl<sub>2</sub>): δ 41.5. *m/z* calculated for C<sub>132</sub>H<sub>252</sub>B<sub>12</sub>O<sub>12</sub> (M<sup>+</sup>), 2161.0332 Da; due to solubility issues, the molecule was incompatible with our M.S. instrument.

### Dodeca(ethylbutyratoxy)-*hypercloso*-dodecaborane [8]

TBA<sub>2</sub>[1] (100.0 mg, 0.122 mmol) was added to a 10 mL glass microwave vial and transferred out of a nitrogen filled glovebox, opened to the air, and dissolved in 2 mL acetonitrile. *N,N*-diisopropylethylamine (0.4 mL, 2.30 mmol) and ethyl 4-bromobutyrate (1.08 mL, 7.55 mmol) were added along with a stir bar, the vial was sealed with a PTFE/silicone cap, and the mixture was heated at 140 °C with stirring in the microwave for 1.5 h. The volatiles were removed *via* rotary evaporation, and the reaction mixture was eluted through Sephadex LH-20 size exclusion column with methanol, with the pink fraction containing the desired 1-/2- product collected. The methanol was removed *via* rotary evaporation, and the charged 1-/2- product mixture was oxidized by eluting through a slurry-packed silica gel column with 90/10 CH<sub>2</sub>Cl<sub>2</sub>/ethanol, collecting the orange fraction. Following oxidation, the solvent mixture was removed *via* rotary evaporation, and the product was purified by eluting through a short (15 cm) silica gel column slurry-packed with 1:1 hexanes/ethyl ether, with ~50 mL 1:1 hexanes/ethyl ether followed by ~50 mL ethyl ether eluting an orange band. The volatiles were removed *via* rotary evaporation, and the final neutral product **8** was dried under high vacuum to obtain an isolated yield of 14.0 mg (7%). *Note: ~8% additional 1-/2- product was collected from the first silica column, and by repeating the oxidation step with the charged 1-/2- mixture additional 8 can be isolated.* Compound **8** is an orange solid. <sup>1</sup>H NMR (500 MHz, CDCl<sub>3</sub>): δ 4.11 (q, 24H, O-CH<sub>2</sub>), 4.03 (t, 24H, COOCH<sub>2</sub>), 2.34 (t, 24H, CH<sub>2</sub>COO), 1.87 (m, 24H, O-CH<sub>2</sub>CH<sub>2</sub>), 1.24 (t, 36H, CH<sub>3</sub>). <sup>13</sup>C{<sup>1</sup>H} NMR (125 MHz, CDCl<sub>3</sub>): δ, 173.3, 69.7, 60.3, 30.9, 27.4, 14.2. <sup>11</sup>B{<sup>1</sup>H} NMR (128 MHz, CDCl<sub>3</sub>): δ 41.9. HRMS (Orbitrap): *m/z* calculated for C<sub>72</sub>H<sub>132</sub>B<sub>12</sub>O<sub>36</sub> (M<sup>-</sup>), 1702.9688 Da; found, 1702.9714 Da.

### **Dodeca(4-methylbenzyloxy)-hypercloso-dodecaborane [9]**

TBA<sub>2</sub>[1] (48.0 mg, 0.059 mmol) was added to a 10 mL glass microwave vial and transferred out of a nitrogen filled glovebox, opened to the air, and dissolved in 1 mL acetonitrile. *N,N*-diisopropylethylamine (0.2 mL, 1.15 mmol) and 4-methylbenzyl bromide (1.362 g, 7.36 mmol) were added along with a stir bar, the vial was sealed with a PTFE/silicone cap, and the mixture was heated at 140 °C with stirring in the microwave for 5 min. The volatiles were removed *via* rotary evaporation, and the excess reagent was eluted through a slurry-packed silica gel column with 90/10 hexanes/ethyl acetate, and the pink/purple product mixture was eluted with acetonitrile. The volatiles were removed *via* rotary evaporation, the remaining charged 1-/2- product mixture was dissolved in 5 mL 90/10 ethanol/acetonitrile, FeCl<sub>3</sub>·6H<sub>2</sub>O (0.3 g, 1.11 mmol) was added and the mixture was left to stir for 12-24 h. Following oxidation, the solvent mixture was removed *via* rotary evaporation, and a dark orange band containing the neutral product was separated from the FeCl<sub>3</sub>·6H<sub>2</sub>O through a slurry-packed silica gel column with CH<sub>2</sub>Cl<sub>2</sub>. The CH<sub>2</sub>Cl<sub>2</sub> was removed *via* rotary evaporation and the final neutral product **9** was dried under high vacuum to obtain an isolated yield of 30.9 mg (33%). Compound **9** is a brown/orange viscous oil. <sup>1</sup>H NMR (400 MHz, CDCl<sub>3</sub>): δ 6.98 (m, 48H, C<sub>6</sub>H<sub>4</sub>), 5.17 (s, 24H, CH<sub>2</sub>), 2.31 (s, 36H, CH<sub>3</sub>). <sup>13</sup>C{<sup>1</sup>H} NMR (125 MHz, CDCl<sub>3</sub>): δ 137.9, 136.4, 128.7, 127.3, 72.8, 21.2. <sup>11</sup>B{<sup>1</sup>H} NMR (128 MHz, CDCl<sub>3</sub>): δ 41.6. HRMS (Orbitrap): *m/z* calculated for C<sub>96</sub>H<sub>108</sub>B<sub>12</sub>O<sub>12</sub> (M<sup>+</sup>), 1582.9030 Da; found, 1582.9058 Da.

### **Dodeca(4-bromobenzyloxy)-hypercloso-dodecaborane [10]**

TBA<sub>2</sub>[1] (50.0 mg, 0.061 mmol) was added to a 10 mL glass microwave vial and transferred out of a nitrogen filled glovebox, opened to the air, and dissolved in 1 mL acetonitrile. *N,N*-

diisopropylethylamine (0.2 mL, 1.15 mmol) and 4-bromobenzyl bromide (1.358 g, 7.36 mmol) were added along with a stir bar, the vial was sealed with a PTFE/silicone cap, and the mixture was heated at 140 °C with stirring in the microwave for 30 min. The volatiles were removed *via* rotary evaporation, and the excess reagent was eluted through a slurry-packed silica gel column with hexanes, and the red-pink product mixture was eluted with CH<sub>2</sub>Cl<sub>2</sub> followed by ethyl acetate. The volatiles were removed *via* rotary evaporation, the remaining charged 1-/2- product mixture was dissolved in 5 mL 90/10 ethanol/acetonitrile, FeCl<sub>3</sub>·6H<sub>2</sub>O (0.3 g, 1.11 mmol) was added and the mixture was left to stir for 12-24 h. Following oxidation, the solvent mixture was removed *via* rotary evaporation, and a dark orange band containing the neutral product was separated from the FeCl<sub>3</sub>·6H<sub>2</sub>O through a slurry-packed silica gel column with CH<sub>2</sub>Cl<sub>2</sub>. The CH<sub>2</sub>Cl<sub>2</sub> was removed *via* rotary evaporation and the final neutral product **10** was dried under high vacuum to obtain an isolated yield of 62.5 mg (43%). Compound **10** is a dark-orange solid. <sup>1</sup>H NMR (400 MHz, CDCl<sub>3</sub>): δ 7.33 (d, 24H, *m*-C<sub>6</sub>H<sub>4</sub>), 6.86 (d, 24H, *o*-C<sub>6</sub>H<sub>4</sub>), 5.07 (s, 24H, O-CH<sub>2</sub>). <sup>13</sup>C{<sup>1</sup>H} NMR (125 MHz, CDCl<sub>3</sub>): δ, 138.5, 131.6, 128.5, 121.6, 72.6. <sup>11</sup>B{<sup>1</sup>H} NMR (128 MHz, CDCl<sub>3</sub>): δ 41.4. HRMS (Orbitrap): *m/z* calculated for C<sub>84</sub>H<sub>72</sub>B<sub>12</sub>Br<sub>12</sub>O<sub>12</sub> (M), 2361.6291 Da; found, 2361.6311 Da.

#### **Dodeca(4-trifluoromethylbenzyloxy)-hypercloso-dodecaborane [11]**

TBA<sub>2</sub>[**1**] (50.0 mg, 0.061 mmol) was added to a 10 mL glass microwave vial and transferred out of a nitrogen filled glovebox, opened to the air, and dissolved in 1 mL acetonitrile. *N,N*-diisopropylethylamine (0.2 mL, 1.15 mmol) and 4-trifluoromethylbenzyl bromide (1.765 g, 7.5 mmol) were added along with a stir bar, the vial was sealed with a PTFE/silicone cap, and the mixture was reacted at 140 °C with stirring in the microwave for 30 min. The volatiles were removed *via* rotary evaporation, and the excess reagent was eluted through a slurry-packed silica

gel column with hexanes, and the pink/purple product mixture was eluted with acetonitrile. The acetonitrile was removed *via* rotary evaporation, the remaining charged 1-/2- product mixture was dissolved in 5 mL of 90/10 ethanol/acetonitrile, FeCl<sub>3</sub>·6H<sub>2</sub>O (0.4 g, 1.48 mmol) was added and the mixture was left to stir for 12-24 h. Following oxidation, the solvent mixture was removed *via* rotary evaporation, and an orange band containing the neutral product was separated from the FeCl<sub>3</sub>·6H<sub>2</sub>O through a slurry-packed silica gel column with CH<sub>2</sub>Cl<sub>2</sub>. The CH<sub>2</sub>Cl<sub>2</sub> was removed *via* rotary evaporation and the final neutral product **11** was dried under high vacuum to obtain an isolated yield of 89.6 mg (66%). Compound **11** is a red-orange solid. <sup>1</sup>H NMR (500 MHz, CDCl<sub>3</sub>): δ 7.38 - 7.48 (m, 24H, *m*-C<sub>6</sub>H<sub>4</sub>), 7.06 - 7.15 (m, 24H, *o*-C<sub>6</sub>H<sub>4</sub>), 5.27 (s, 24H, O-CH<sub>2</sub>). <sup>13</sup>C{<sup>1</sup>H} NMR (125 MHz, CDCl<sub>3</sub>): δ 143.0, 130.6, 126.6, 125.7, 125.0, 122.8, 72.9. <sup>11</sup>B{<sup>1</sup>H} NMR (128 MHz, CDCl<sub>3</sub>): δ 41.8. <sup>19</sup>F NMR (376 MHz, CDCl<sub>3</sub>): δ -62.76 (s, 36F). HRMS (Orbitrap): *m/z* calculated for C<sub>96</sub>H<sub>72</sub>B<sub>12</sub>F<sub>36</sub>O<sub>12</sub> (M<sup>+</sup>), 2231.5672 Da; found, 2231.5637 Da. Crystallized from CDCl<sub>3</sub> and pentane at room temperature for 1 week to obtain a single crystal for X-ray diffraction analysis.

#### **Dodeca(4-nitrobenzyloxy)-hypocloso-dodecaborane [12]<sup>1-</sup>**

TBA<sub>2</sub>[**1**] (50.0 mg, 0.061 mmol) was added to a 10 mL glass microwave vial and transferred out of a nitrogen filled glovebox, opened to the air, and dissolved in 1 mL acetonitrile. *N,N*-diisopropylethylamine (0.2 mL, 1.15 mmol) and 4-nitrobenzyl bromide (1.585 g, 7.34 mmol) were added along with a stir bar, the vial was sealed with a PTFE/silicone cap, and the mixture was heated at 140 °C with stirring in the microwave for 30 min. The volatiles were removed *via* rotary evaporation, and the excess reagent was eluted through a slurry-packed silica gel column with 50/50 hexanes/CH<sub>2</sub>Cl<sub>2</sub>, and the orange product mixture was eluted with acetonitrile. The volatiles were removed *via* rotary evaporation, the remaining charged 1-/2- product mixture was dissolved

in 5 mL 90/10 ethanol/acetonitrile,  $\text{FeCl}_3 \cdot 6\text{H}_2\text{O}$  (0.3 g, 1.11 mmol) was added and the mixture was left to stir for 12-24 h. Following oxidation, the solvent mixture was removed *via* rotary evaporation, and the product mixture was washed with 150 – 200 mL ethanol in a glass fritted 30 mL filter funnel to remove the remaining  $\text{FeCl}_3 \cdot 6\text{H}_2\text{O}$ . The remaining orange radical 1- product  $\text{TBA}[\mathbf{12}]^{\cdot-}$  was removed from the funnel and dried under high vacuum to obtain an isolated yield of 89.0 mg (66%). Compound  $\text{TBA}[\mathbf{12}]^{\cdot-}$  is an orange solid.  $^1\text{H}$  NMR (400 MHz,  $\text{CDCl}_3$ ):  $\delta$  8.49 - 7.41 (m, 48H,  $\text{C}_6\text{H}_4$ ). *Note: The  $\text{CH}_2$  signal is masked and all other peaks are quite broad due to the paramagnetic radical state of the molecule.*  $^{13}\text{C}\{^1\text{H}\}$  NMR (125 MHz,  $\text{CDCl}_3$ ):  $\delta$  191.26, 147.47, 140.59, 130.55, 124.24. *Note: The  $\text{CH}_2$  signal is masked and all other peaks are quite broad due to the paramagnetic radical state of the molecule.* No resonances are visible by  $^{11}\text{B}$  NMR due to paramagnetic broadening (a trace resonance at 20.4 ppm is indicative of borates, which result from decomposition). HRMS (Orbitrap):  $m/z$  calculated for  $\text{C}_{84}\text{H}_{72}\text{B}_{12}\text{N}_{12}\text{O}_{36}$  ( $\text{M}^-$ ), 1954.5361 Da; found, 1954.5363 Da.

### **Dodeca(3,5-bis(trifluoromethyl)<sub>2</sub>benzyloxy)-hypocloso-dodecaborane [ $\mathbf{13}$ ]<sup>1-</sup>**

$\text{TBA}_2[\mathbf{1}]$  (99.0 mg, 0.121 mmol) was added to a 10 mL glass microwave vial and transferred out of a nitrogen filled glovebox, opened to the air, and dissolved in 2 mL acetonitrile. *N,N*-diisopropylethylamine (0.4 mL, 2.30 mmol) and 3,5-bis(trifluoromethyl)benzyl bromide (2.68 mL, 14.6 mmol) were added along with a stir bar, the vial was sealed with a PTFE/silicone cap, and the mixture was heated at 140 °C with stirring in the microwave for 30 min. The volatiles were removed *via* rotary evaporation, and the excess reagent was eluted through a slurry-packed silica gel column with 65/35 hexanes/ethyl acetate, and the colorless/very light pink product mixture was eluted with  $\text{CH}_2\text{Cl}_2$ . After removal of the  $\text{CH}_2\text{Cl}_2$  *via* rotary evaporation, compound  $\text{TBA}_2[\mathbf{13}]^{2-}$ , a clear, colorless solid, was dried under high vacuum to obtain an isolated yield of

313.6 mg (73%). After spectroscopic characterization, the dianionic  $\text{TBA}_2[\mathbf{13}]^{2-}$  was dissolved in 5 mL 90/10 ethanol/acetonitrile, 0.3 g (1.11 mmol)  $\text{FeCl}_3 \cdot 6\text{H}_2\text{O}$  was added and the mixture was left to stir for 12-24 h. Following oxidation, the solvent mixture was removed *via* rotary evaporation, and a red-purple band containing  $[\mathbf{13}]^{1-}$  was separated from the  $\text{FeCl}_3 \cdot 6\text{H}_2\text{O}$  through a slurry-packed silica gel column with  $\text{CH}_2\text{Cl}_2$ . The  $\text{CH}_2\text{Cl}_2$  was removed *via* rotary evaporation and the final isolated radical  $[\mathbf{13}]^{1-}$  was dried under high vacuum to obtain an isolated yield of 226.4 mg (56%). Compound  $[\mathbf{13}]^{1-}$  is a red-purple solid.  $^1\text{H}$  NMR (500 MHz,  $\text{CDCl}_3$ ):  $\delta$  7.40 – 8.74 (m, 36H,  $\text{C}_6\text{H}_3$ ), 3.13 (m, 8H, N- $\text{CH}_2$ ), 1.65 (m, 8H, N- $\text{CH}_2\text{CH}_2$ ), 1.47 (m, 8H, N-( $\text{CH}_2$ ) $2\text{CH}_2$ ), 1.05 (m, 12H, N-( $\text{CH}_2$ ) $3\text{CH}_3$ ). *Note: The  $\text{CH}_2$  signal for the cluster is masked and all other peaks are quite broad due to the paramagnetic radical state of the molecule.*  $^{13}\text{C}\{^1\text{H}\}$  NMR (125 MHz,  $\text{CDCl}_3$ ):  $\delta$  189.0, 132.7, 132.5, 129.4, 124.6, 122.5, 121.0, 68.0, 59.2, 59.2, 59.1, 30.9, 25.6, 23.8, 19.7, 19.7, 13.4. No resonances are visible by  $^{11}\text{B}$  NMR, due to paramagnetic broadening.  $^{19}\text{F}$  NMR (376 MHz,  $\text{CDCl}_3$ ):  $\delta$  -63.22 (s, 72F). HRMS (Orbitrap):  $m/z$  calculated for  $\text{C}_{108}\text{H}_{60}\text{B}_{12}\text{F}_{72}\text{O}_{12}$  ( $\text{M}^-$ ), 3047.4158 Da; found, 1523.7080 ( $z=2$ ) Da. Crystallized from  $\text{CDCl}_3$  and pentane at room temperature for 1 week to obtain a single crystal for X-ray diffraction analysis.

### **Benzyloxy undeca(ethoxy)-hypercloso-dodecaborane [14]**

$\text{TBA}_2[\mathbf{1}]$  (100.0 mg, 0.122 mmol) was added to a 10 mL glass microwave vial and transferred out of a nitrogen filled glovebox, opened to the air, and dissolved in 2 mL acetonitrile. *N,N*-diisopropylethylamine (0.4 mL, 2.30 mmol), benzyl bromide (0.0204 g, 0.119 mmol) and bromoethane (0.8055g, 7.39 mmol) were added along with a stir bar, the vial was sealed with a PTFE/silicone cap, and the mixture was heated at 140 °C with stirring in the microwave for 30 min. The volatiles and excess bromoethane were removed *via* rotary evaporation, the remaining charged 1-/2- product mixture was dissolved in 5 mL 90/10 ethanol/acetonitrile,  $\text{FeCl}_3 \cdot 6\text{H}_2\text{O}$  (0.3



g, 1.11 mmol) was added and the mixture was left to stir for 12-24 h. Following oxidation, the solvent mixture was removed *via* rotary evaporation, and the product mixture was separated from the  $\text{FeCl}_3 \cdot 6\text{H}_2\text{O}$  with  $\text{CH}_2\text{Cl}_2$ . The  $\text{CH}_2\text{Cl}_2$  was removed *via* rotary evaporation, and the product mixture was loaded onto a long (30 – 35 cm) silica gel column slurry-packed with 80/20  $\text{CH}_2\text{Cl}_2$ /hexanes, and the products were separated by eluting fractions with 80/20  $\text{CH}_2\text{Cl}_2$ /hexanes. The first orange band eluted contained randomly di-substituted benzyl<sub>2</sub>ethyl<sub>10</sub> species, followed by an orange band with the neutral closomer **14**, with extra **4** in a third yellow-orange band eluting last. *Note: The fractions overlap, and due to the similar colors of the different products, thin layer chromatography (TLC) with 80/20  $\text{CH}_2\text{Cl}_2$ /hexanes was performed on the fractions near the band edges to determine which fractions contained a mixture of products.* The fractions containing only a single species according to TLC that eluted after the di-substituted product and prior to the pure **4** bands were combined. The volatiles were removed *via* rotary evaporation, and the final neutral product **14** was dried under high vacuum to obtain an isolated yield of 15.7 mg (18%). Compound **14** is a yellow-orange solid.  $^1\text{H}$  NMR (400 MHz,  $\text{CDCl}_3$ ):  $\delta$  7.30 (m, 5H,  $\text{C}_6\text{H}_5$ ), 5.07 (m, 2H,  $\text{CH}_2\text{C}_6\text{H}_5$ ), 4.10 (m, 22H,  $\text{CH}_2\text{CH}_3$ ), 1.22 (m, 33H,  $\text{CH}_2\text{CH}_3$ ).  $^{13}\text{C}\{^1\text{H}\}$  NMR (125 MHz,  $\text{CDCl}_3$ ):  $\delta$  141.2, 128.0, 126.6, 71.6, 66.8, 17.7.  $^{11}\text{B}$  NMR (128 MHz,  $\text{CDCl}_3$ ):  $\delta$  39.0, 35.2. HRMS (DART):  $m/z$  calculated for  $\text{C}_{29}\text{H}_{62}\text{B}_{12}\text{O}_{12}$  (M<sup>-</sup>), 732.5431 Da; found, 732.5464 Da.

## References

- 1 I. S. Zavarine and C. P. Kubiak, *J. Electroanal. Chem.*, 2001, **495**, 106–109.
- 2 C. W. Machan, M. D. Sampson, S. A. Chabolla, T. Dang and C. P. Kubiak, *Organometallics*, 2014, **33**, 4550–4559.
- 3 T. Peymann, C. B. Knobler, S. I. Khan and M. F. Hawthorne, *J. Am. Chem. Soc.*, 2001, **123**, 2182–2185.
- 4 M. J. Bayer and M. F. Hawthorne, *Inorg. Chem.*, 2004, **43**, 2018–2020.

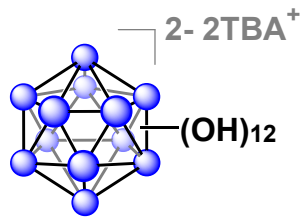

# <sup>11</sup>B {<sup>1</sup>H} NMR

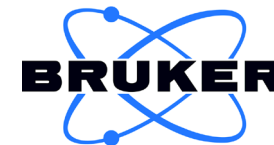

— -17.928

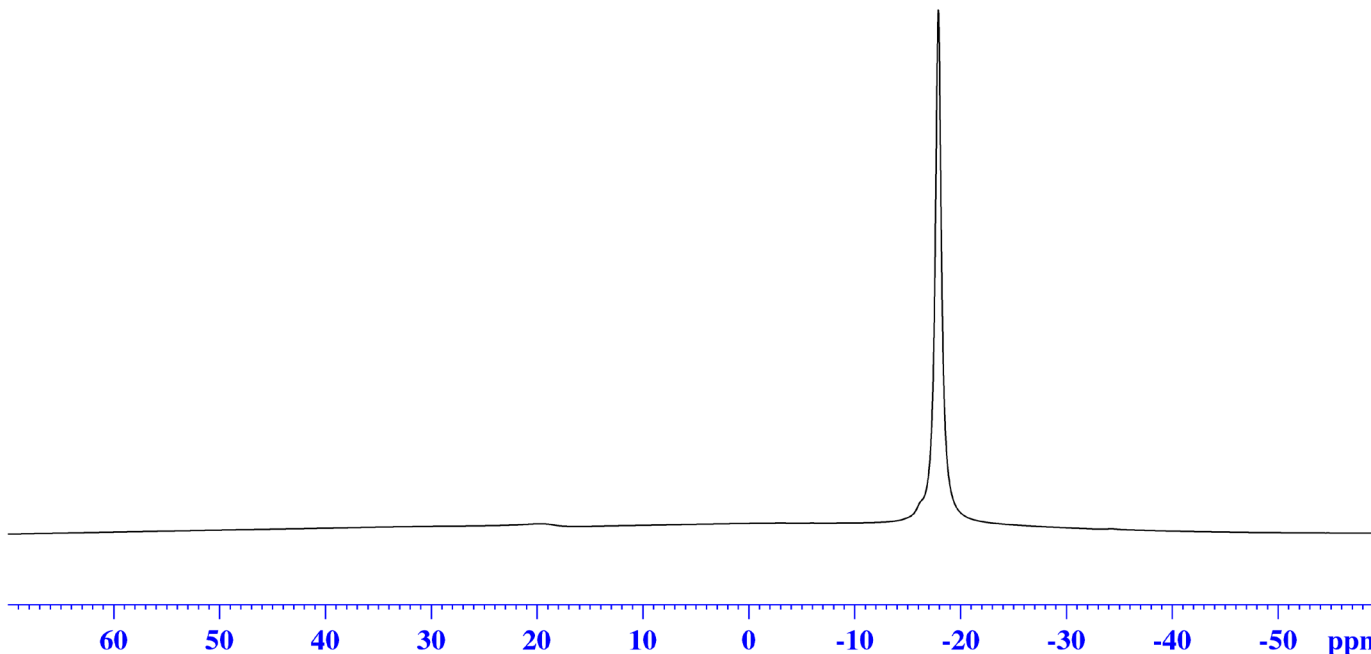

Current Data Parameters  
 NAME Apr27-2015-spokoiny  
 EXPNO 31  
 PROCNO 1

F2 - Acquisition Parameters  
 Date\_ 20150427  
 Time 17.32  
 INSTRUM av400  
 PROBHD 5 mm PABBO BB/  
 PULPROG zgdc.js  
 TD 5096  
 SOLVENT D2O  
 NS 1024  
 DS 0  
 SWH 51020.406 Hz  
 FIDRES 10.011854 Hz  
 AQ 0.0499408 sec  
 RG 189.85  
 DW 9.800 usec  
 DE 6.50 usec  
 TE 300.0 K  
 D1 0.00000400 sec  
 D11 0.03000000 sec  
 TD0 1

===== CHANNEL f1 =====  
 SFO1 128.3776052 MHz  
 NUC1 11B  
 P1 10.00 usec  
 PLW1 52.00000000 W

===== CHANNEL f2 =====  
 SFO2 400.1324008 MHz  
 NUC2 1H  
 CPDPRG[2] waltz16  
 PCPD2 90.00 usec  
 PLW2 13.00000000 W  
 PLW12 0.36111000 W

F2 - Processing parameters  
 SI 32768  
 SF 128.3776050 MHz  
 WDW EM  
 SSB 0  
 LB 50.00 Hz  
 GB 0  
 PC 1.40



# <sup>1</sup>H NMR

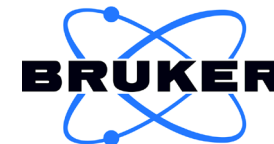

4.756  
4.730  
4.699  
4.694  
4.656  
4.608  
4.602  
4.599  
4.596  
4.594  
3.150  
3.105  
3.092  
3.084  
3.076  
3.063  
3.042  
3.028  
3.020  
3.000  
1.579  
1.560  
1.548  
1.539  
1.530  
1.519  
1.499  
1.296  
1.278  
1.259  
1.241  
1.222  
1.204  
1.009  
0.990  
0.854  
0.835  
0.817  
0.804  
0.787  
0.695  
0.677

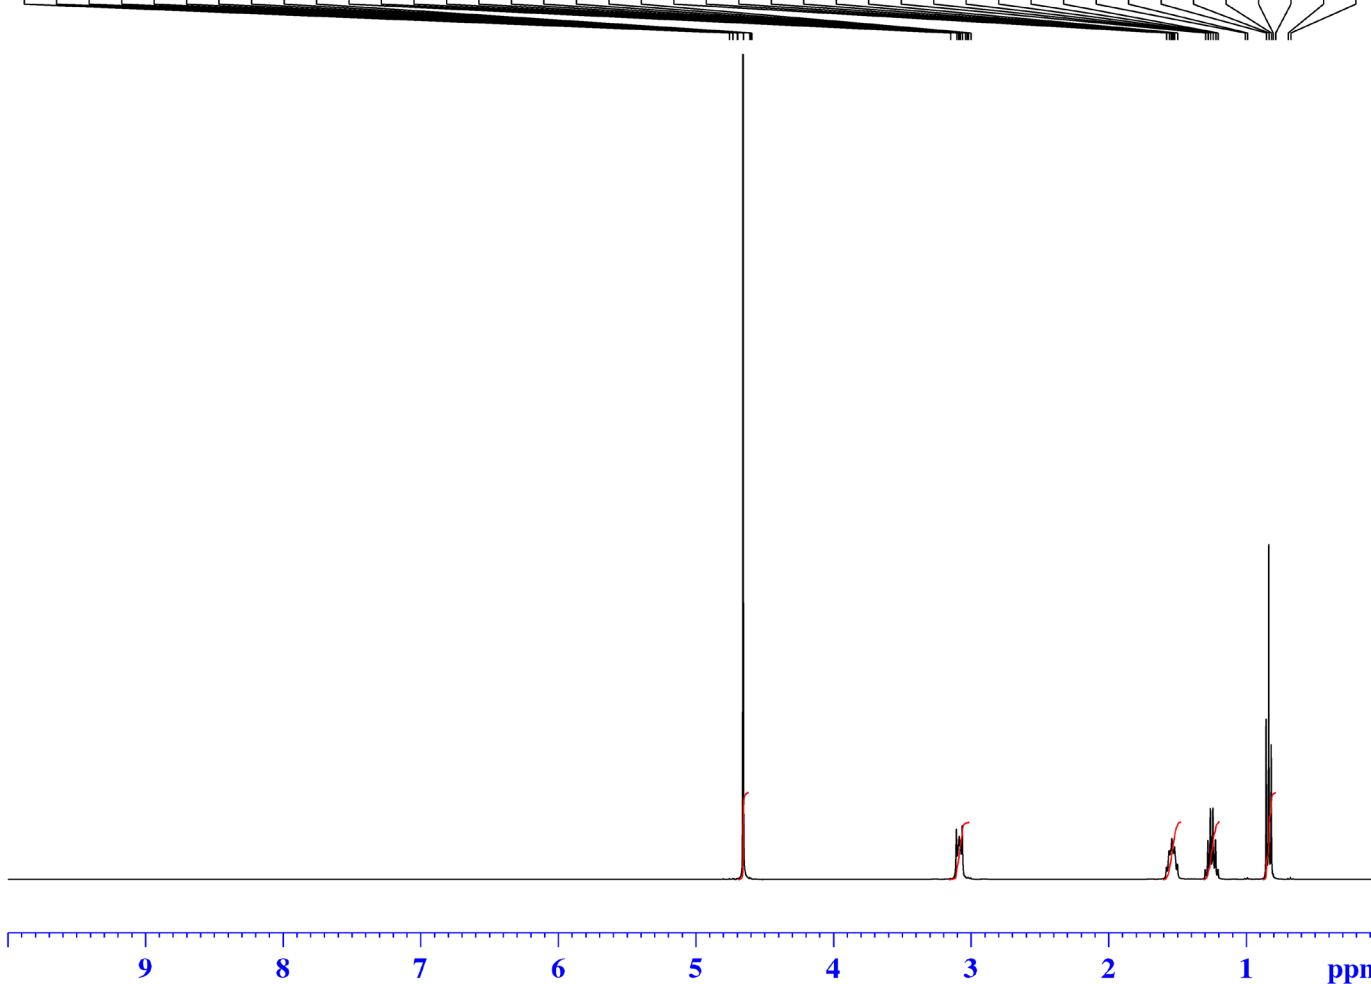

Current Data Parameters  
NAME Apr27-2015-spokoyny  
EXPNO 30  
PROCNO 1

F2 - Acquisition Parameters  
Date\_ 20150427  
Time 17.29  
INSTRUM av400  
PROBHD 5 mm PABBO BB/  
PULPROG zg30  
TD 52882  
SOLVENT D2O  
NS 8  
DS 0  
SWH 8012.820 Hz  
FIDRES 0.151523 Hz  
AQ 3.2998369 sec  
RG 155.85  
DW 62.400 usec  
DE 6.50 usec  
TE 299.7 K  
D1 2.00000000 sec  
TD0 1

===== CHANNEL f1 =====  
SFO1 400.1324008 MHz  
NUC1 1H  
P1 15.00 usec  
PLW1 13.00000000 W

F2 - Processing parameters  
SI 65536  
SF 400.1300184 MHz  
WDW EM  
SSB 0  
LB 0.30 Hz  
GB 0  
PC 1.00

12.121

8.000

7.993

8.045

12.078

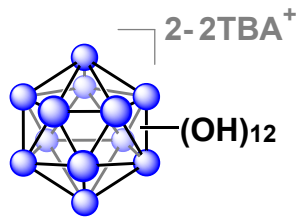

## B 1s XPS

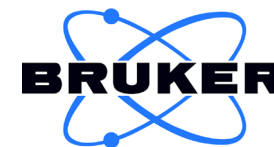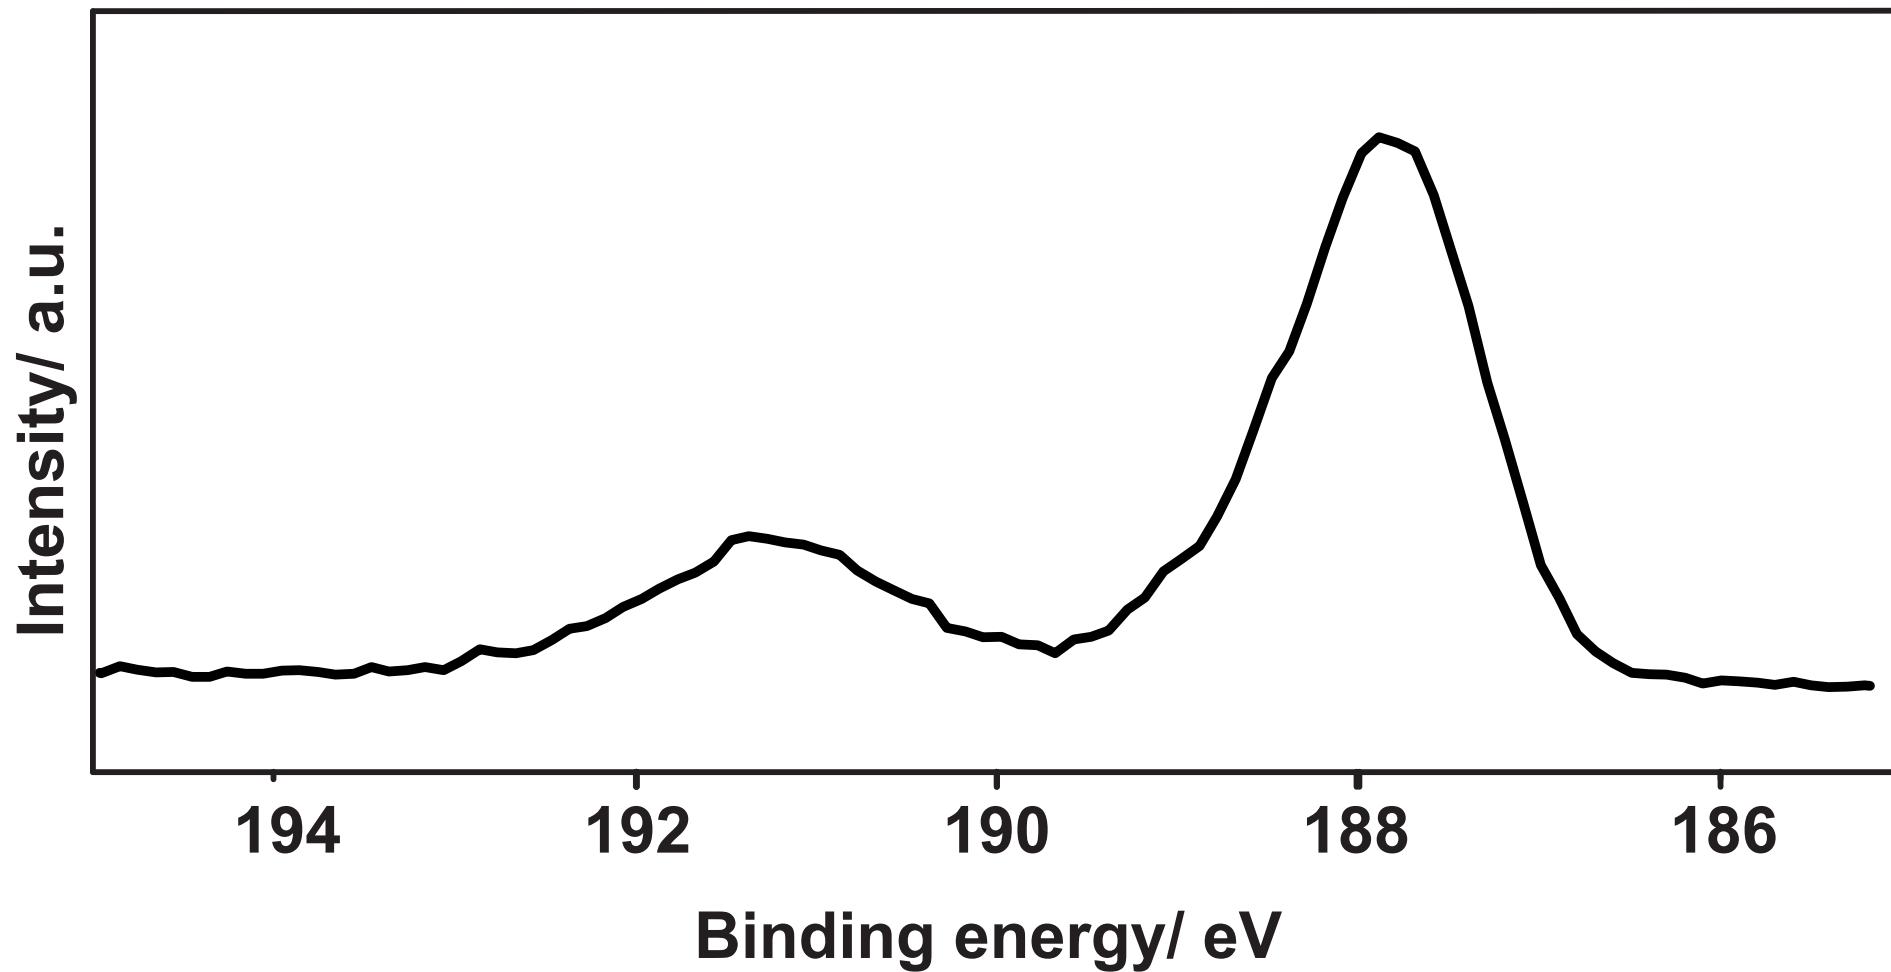

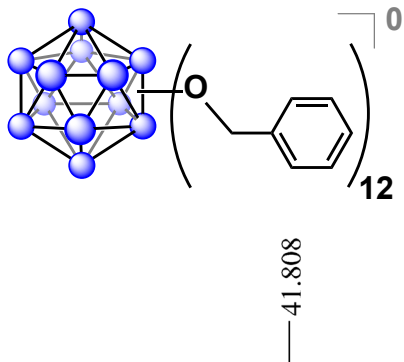

# $^{11}\text{B}$ $\{^1\text{H}\}$ NMR



Current Data Parameters  
 NAME B12(O-Bn)12  
 EXPNO 40  
 PROCNO 1

F2 - Acquisition Parameters  
 Date\_ 20150410  
 Time 16.58  
 INSTRUM av400  
 PROBHD 5 mm PABBO BB/  
 PULPROG zgdc.js  
 TD 5096  
 SOLVENT CDCl3  
 NS 1024  
 DS 0  
 SWH 51020.406 Hz  
 FIDRES 10.011854 Hz  
 AQ 0.0499408 sec  
 RG 189.85  
 DW 9.800 usec  
 DE 6.50 usec  
 TE 299.1 K  
 D1 0.00000400 sec  
 D11 0.03000000 sec  
 TD0 1

===== CHANNEL f1 =====  
 SFO1 128.3776052 MHz  
 NUC1  $^{11}\text{B}$   
 P1 10.00 usec  
 PLW1 52.00000000 W

===== CHANNEL f2 =====  
 SFO2 400.1324008 MHz  
 NUC2  $^1\text{H}$   
 CPDPRG[2] waltz16  
 PCPD2 90.00 usec  
 PLW2 13.00000000 W  
 PLW12 0.36111000 W

F2 - Processing parameters  
 SI 32768  
 SF 128.3776050 MHz  
 WDW EM  
 SSB 0  
 LB 50.00 Hz  
 GB 0  
 PC 1.40

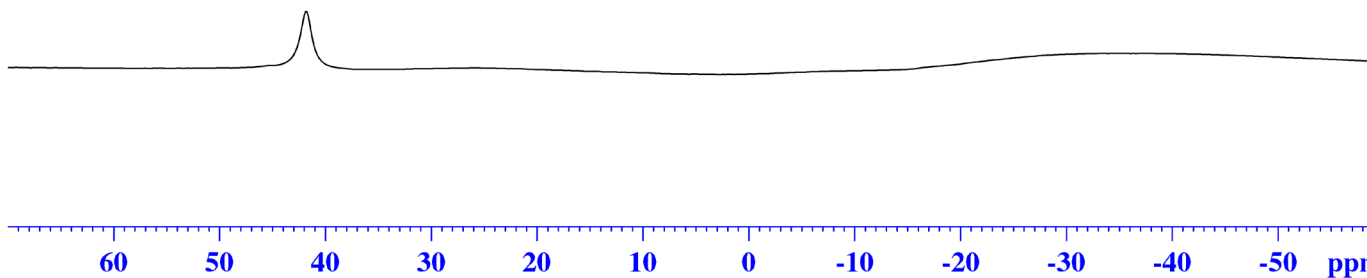

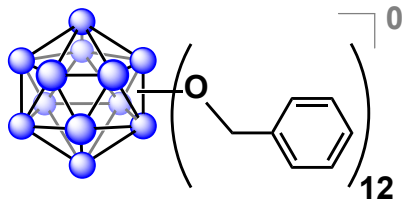

# <sup>13</sup>C NMR

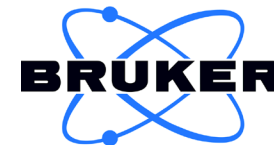

— 140.821  
 { 128.435  
 { 127.351  
 { 127.313  
 — 73.382

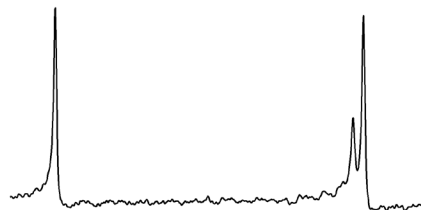

128.0 127.5 ppm

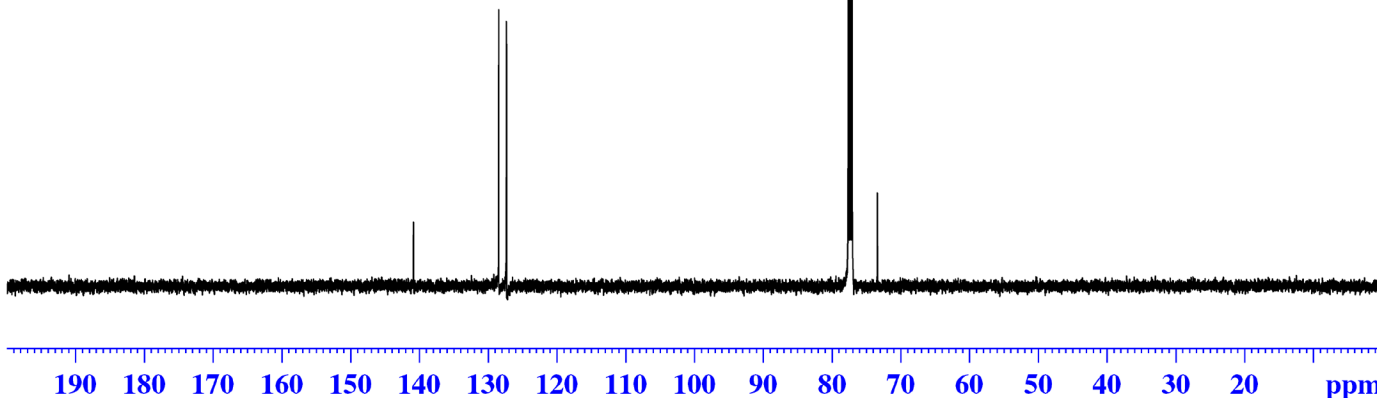

Current Data Parameters  
 NAME B12(O-Bn)12  
 EXPNO 100  
 PROCNO 1

F2 - Acquisition Parameters  
 Date\_ 20150407  
 Time 0.07  
 INSTRUM av500  
 PROBHD 5 mm DCH 13C-1  
 PULPROG zgpg30  
 TD 65536  
 SOLVENT CH3OH+D2O  
 NS 64  
 DS 2  
 SWH 31250.000 Hz  
 FIDRES 0.476837 Hz  
 AQ 1.0485760 sec  
 RG 204.54  
 DW 16.000 usec  
 DE 18.00 usec  
 TE 298.0 K  
 D1 2.00000000 sec  
 D11 0.03000000 sec  
 TD0 1

==== CHANNEL f1 =====  
 SFO1 125.7722511 MHz  
 NUC1 13C  
 P1 9.63 usec  
 PLW1 23.00000000 W

==== CHANNEL f2 =====  
 SFO2 500.1330008 MHz  
 NUC2 1H  
 CPDPRG[2] waltz16  
 PCPD2 80.00 usec  
 PLW2 13.50000000 W  
 PLW12 0.21094000 W  
 PLW13 0.13500001 W

F2 - Processing parameters  
 SI 131072  
 SF 125.7574315 MHz  
 WDW EM  
 SSB 0  
 LB 1.00 Hz  
 GB 0  
 PC 1.40

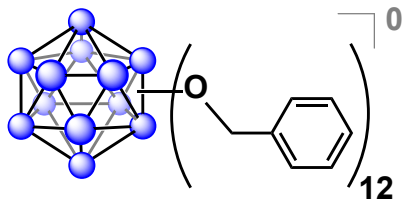

# <sup>1</sup>H NMR

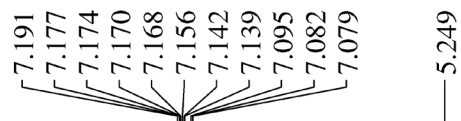

Current Data Parameters  
 NAME B12(O-Bn)12  
 EXPNO 101  
 PROCNO 1

F2 - Acquisition Parameters  
 Date\_ 20150407  
 Time 0.09  
 INSTRUM av500  
 PROBHD 5 mm DCH 13C-1  
 PULPROG zg30  
 TD 65536  
 SOLVENT CH3OH+D2O  
 NS 8  
 DS 0  
 SWH 10000.000 Hz  
 FIDRES 0.152588 Hz  
 AQ 3.2767999 sec  
 RG 63.27  
 DW 50.000 usec  
 DE 10.00 usec  
 TE 298.0 K  
 D1 2.00000000 sec  
 TD0 1

===== CHANNEL f1 =====  
 SFO1 500.1330008 MHz  
 NUC1 1H  
 P1 10.00 usec  
 PLW1 13.50000000 W

F2 - Processing parameters  
 SI 65536  
 SF 500.1287429 MHz  
 WDW EM  
 SSB 0  
 LB 0.30 Hz  
 GB 0  
 PC 1.00

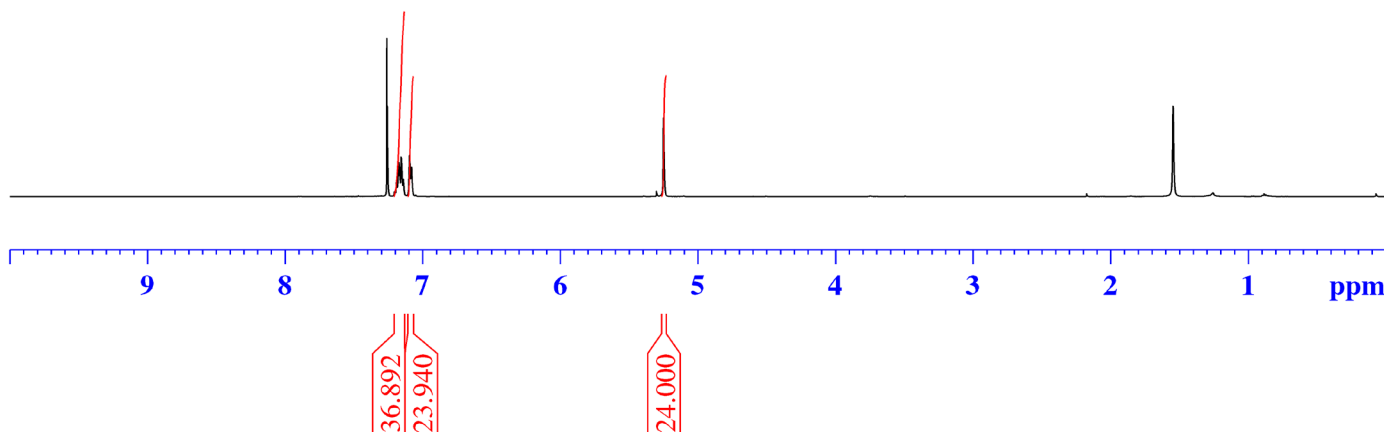



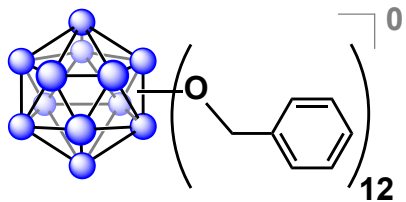

# Q Exactive High-Res Mass Spec

Bn#1 RT: 0.01 AV: 1 NL: 2.17E4  
T: FTMS - p ESI Full ms [500.00-2000.00]

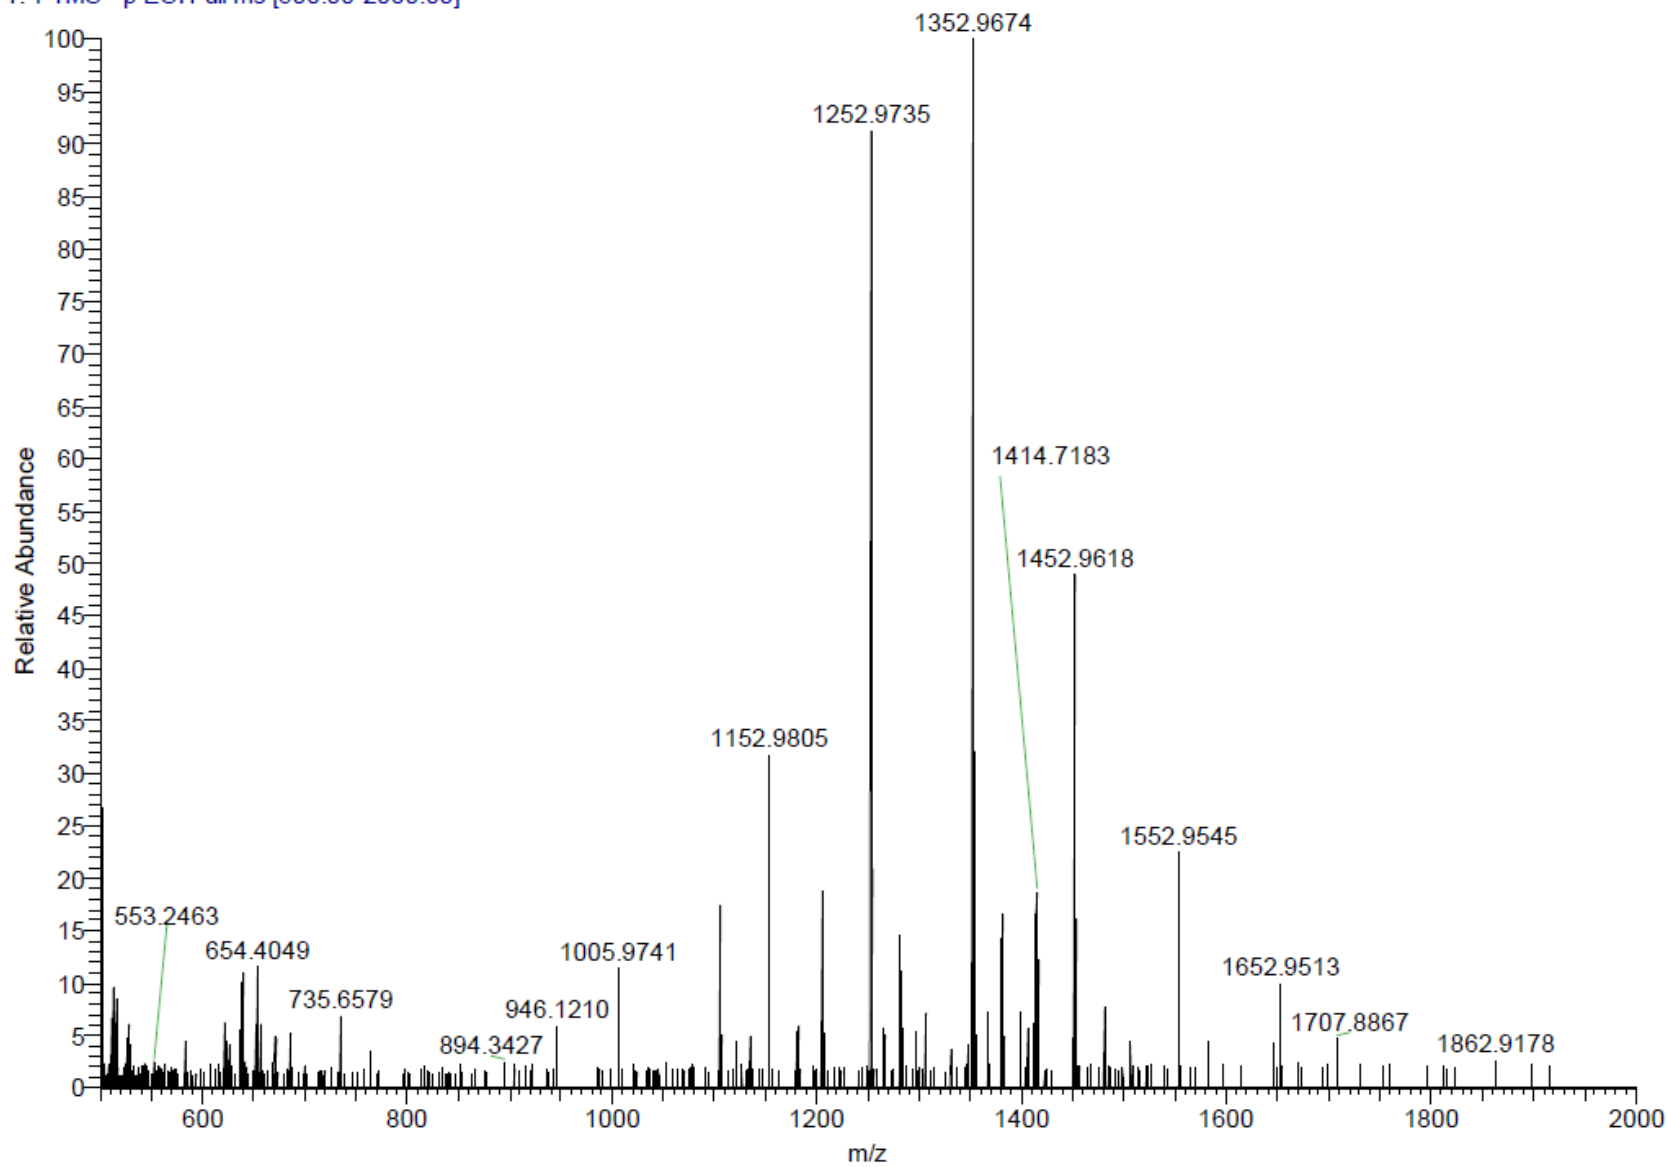

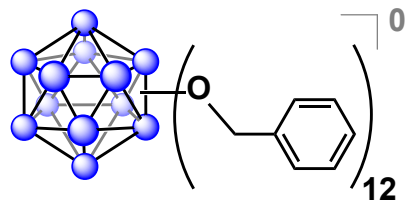

# Q Exactive High-Res Mass Spec

Bn#1 RT: 0.01 AV: 1 NL: 4.03E3  
T: FTMS - p ESI Full ms [500.00-2000.00]

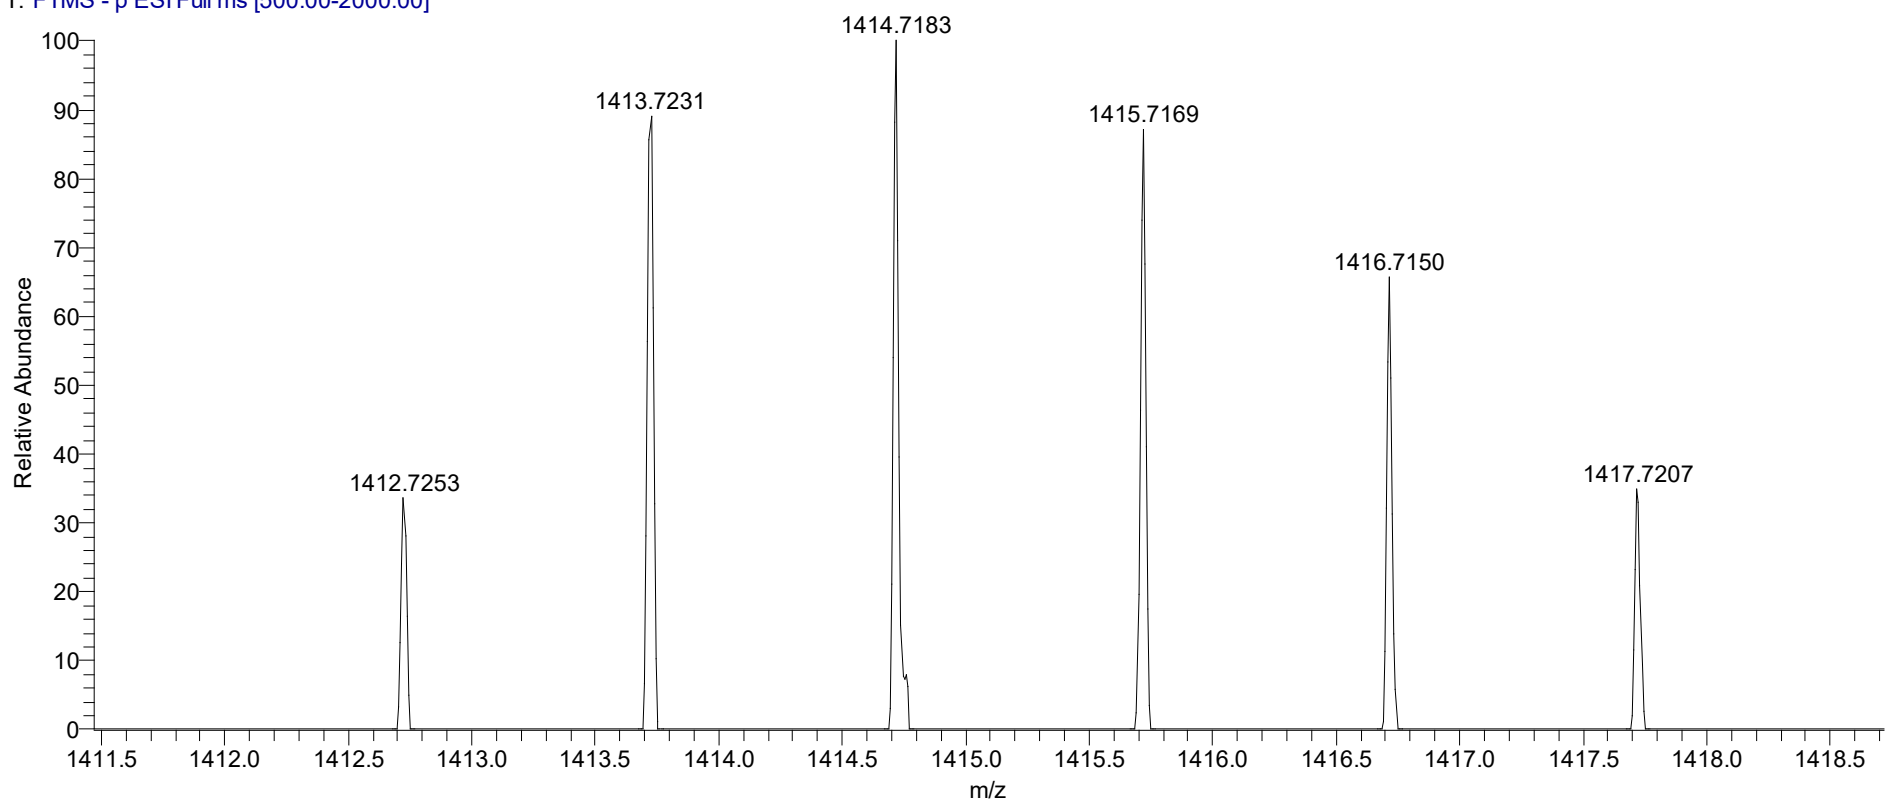

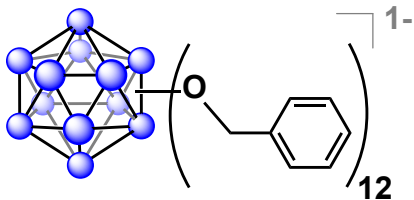

# EPR

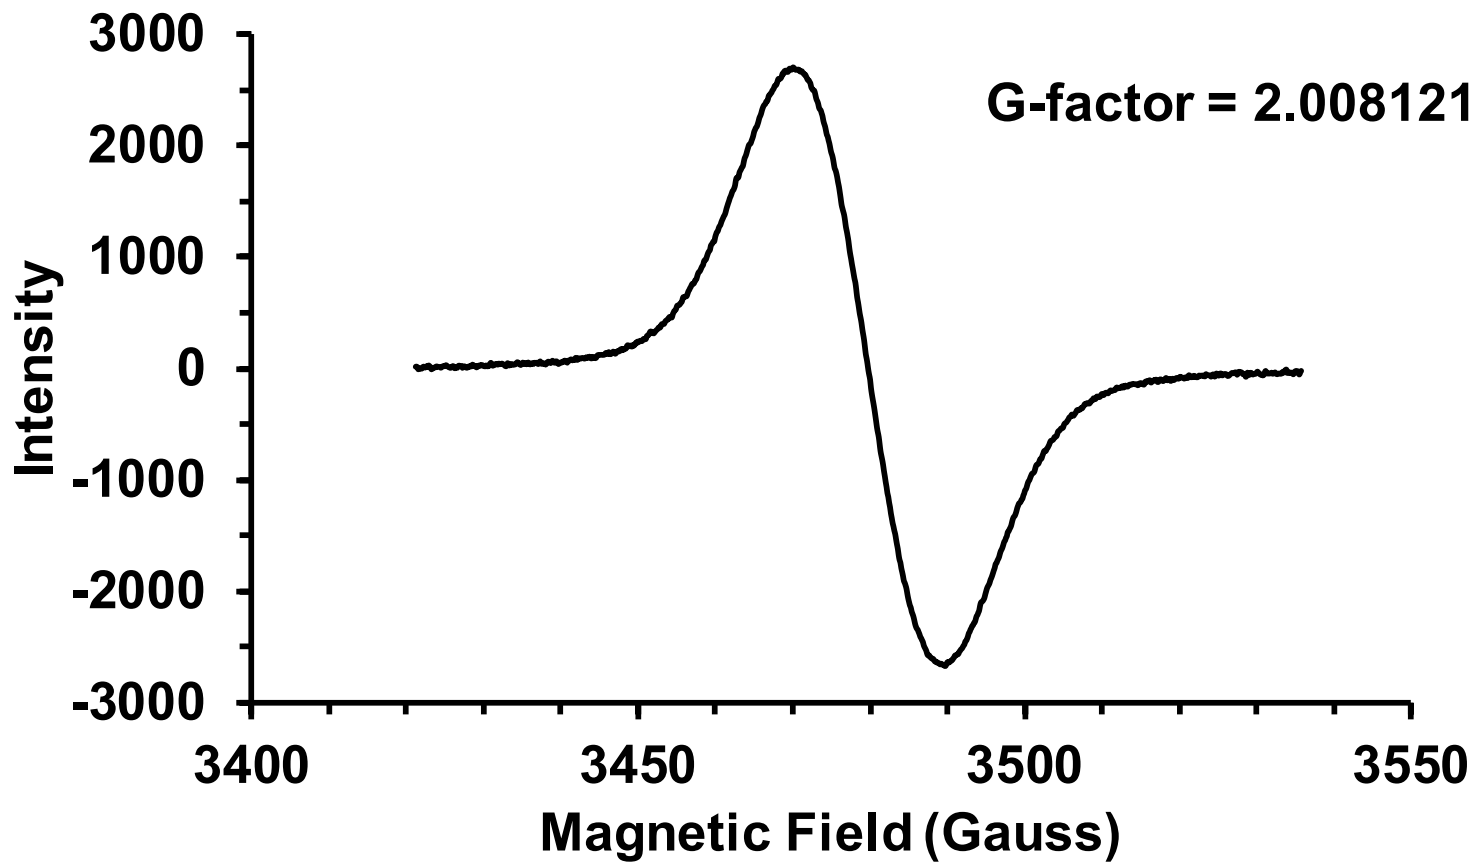

DOS Format  
 ANZ 1024  
 MIN -2666.883789  
 MAX 2704.116211  
 JSS 0  
 GST 3421.274884  
 GSI 114.543004  
 JUN G  
 JON Bruker BioSpin GmbH  
 JDA 11/9/2015  
 JTM 14:44  
 JRE c:\programfiles\bruker-  
 emx\syscal\st0103.cal  
 JEX field-sweep  
 JSD 1  
 HCF 3478.546386  
 HSW 114.543004  
 EMF 0  
 RCT 20.48  
 RTC 20.48  
 RRG 8.93E+03  
 RMA 4  
 MF 9.776766  
 MP 6.38E-01  
 MPD 25

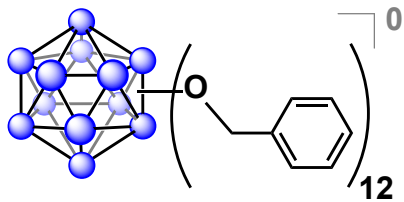

**B 1s XPS**

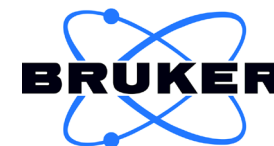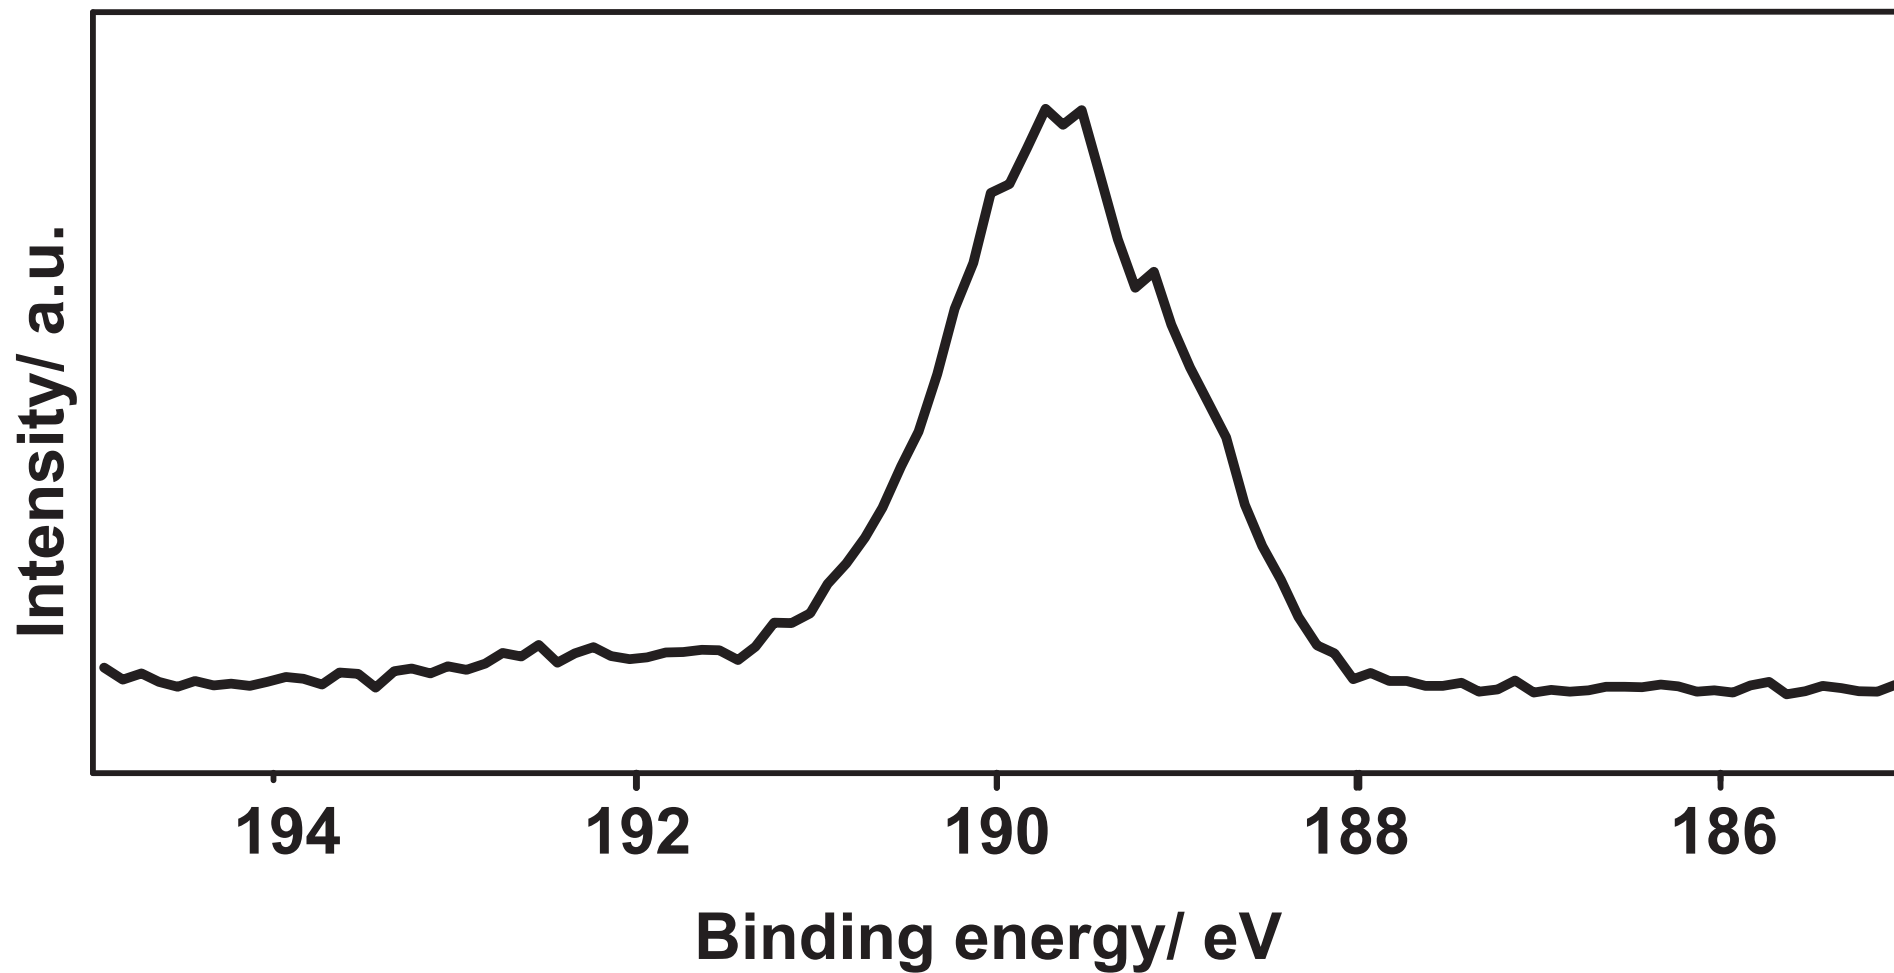

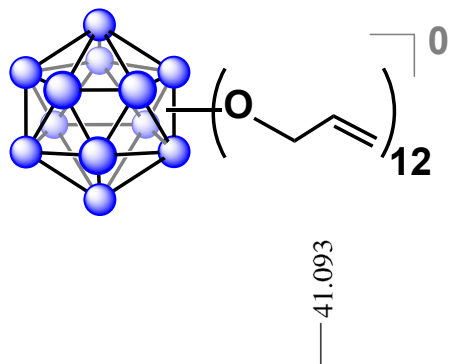

# $^{11}\text{B}$ $\{^1\text{H}\}$ NMR



Current Data Parameters  
 NAME B12(O-Allyl)12  
 EXPNO 130  
 PROCNO 1

F2 - Acquisition Parameters  
 Date\_ 20150221  
 Time 17.36  
 INSTRUM av400  
 PROBHD 5 mm PABBO BB/  
 PULPROG zgdc.js  
 TD 5096  
 SOLVENT CDCl3  
 NS 1024  
 DS 0  
 SWH 51020.406 Hz  
 FIDRES 10.011854 Hz  
 AQ 0.0499408 sec  
 RG 189.85  
 DW 9.800 usec  
 DE 6.50 usec  
 TE 299.0 K  
 D1 0.00000400 sec  
 D11 0.03000000 sec  
 TD0 1

===== CHANNEL f1 =====  
 SFO1 128.3776052 MHz  
 NUC1  $^{11}\text{B}$   
 P1 10.00 usec  
 PLW1 52.00000000 W

===== CHANNEL f2 =====  
 SFO2 400.1324008 MHz  
 NUC2  $^1\text{H}$   
 CPDPRG[2] waltz16  
 PCPD2 90.00 usec  
 PLW2 13.00000000 W  
 PLW12 0.36111000 W

F2 - Processing parameters  
 SI 32768  
 SF 128.3776050 MHz  
 WDW EM  
 SSB 0  
 LB 50.00 Hz  
 GB 0  
 PC 1.40

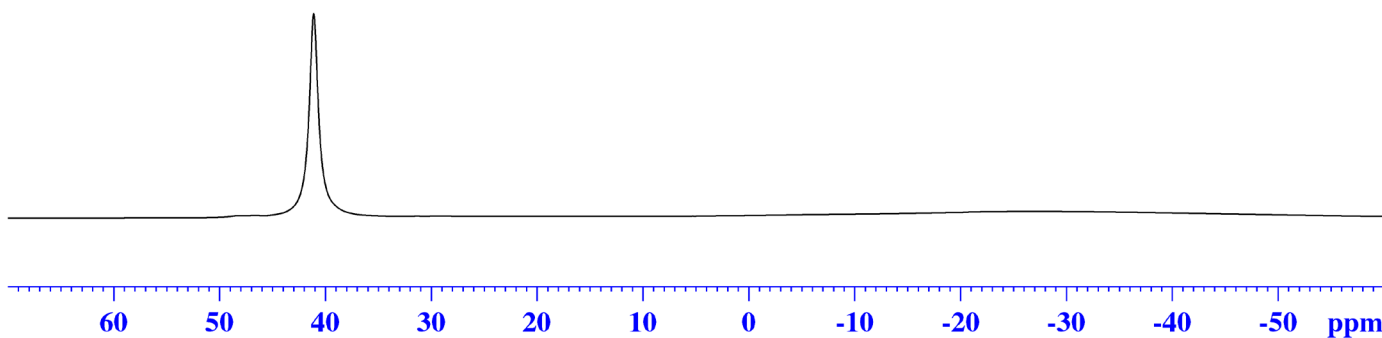

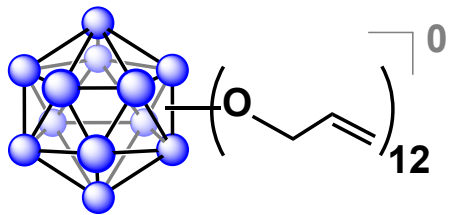

# <sup>13</sup>C NMR

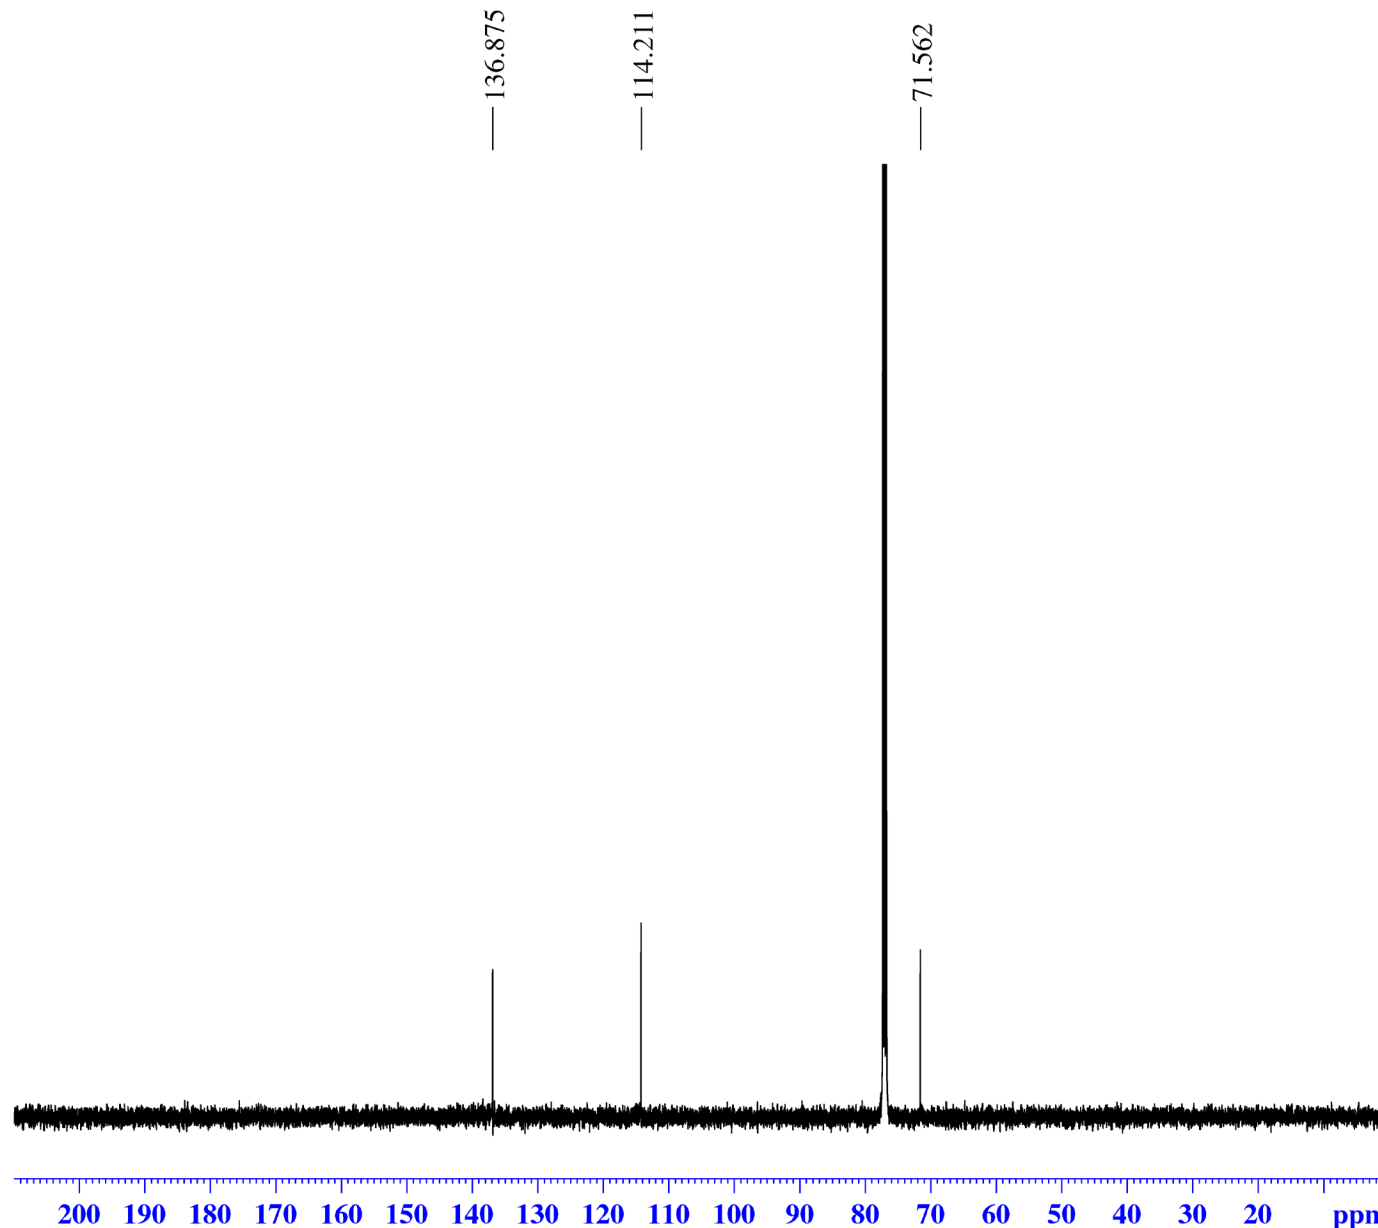

Current Data Parameters  
 NAME B12(O-Allyl)12  
 EXPNO 80  
 PROCNO 1

F2 - Acquisition Parameters  
 Date\_ 20150406  
 Time 23.59  
 INSTRUM av500  
 PROBHD 5 mm DCH 13C-1  
 PULPROG zgpg30  
 TD 65536  
 SOLVENT CDCl3  
 NS 64  
 DS 2  
 SWH 31250.000 Hz  
 FIDRES 0.476837 Hz  
 AQ 1.0485760 sec  
 RG 204.54  
 DW 16.000 usec  
 DE 18.00 usec  
 TE 298.0 K  
 D1 2.00000000 sec  
 D11 0.03000000 sec  
 TD0 1

===== CHANNEL f1 =====  
 SFO1 125.7722511 MHz  
 NUC1 13C  
 P1 9.63 usec  
 PLW1 23.00000000 W

===== CHANNEL f2 =====  
 SFO2 500.1330008 MHz  
 NUC2 1H  
 CPDPRG[2] waltz16  
 PCPD2 80.00 usec  
 PLW2 13.50000000 W  
 PLW12 0.21094000 W  
 PLW13 0.13500001 W

F2 - Processing parameters  
 SI 131072  
 SF 125.7577890 MHz  
 WDW EM  
 SSB 0  
 LB 1.00 Hz  
 GB 0  
 PC 1.40

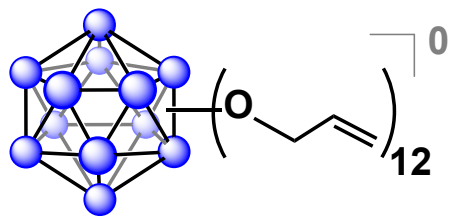

# <sup>1</sup>H NMR



5.979  
5.958  
5.945  
5.924  
5.237  
5.233  
5.229  
5.225  
5.202  
5.199  
5.195  
5.191  
5.069  
5.066  
5.062  
5.059  
5.048  
5.045  
5.041  
5.038  
4.626  
4.623  
4.619  
4.617  
4.613

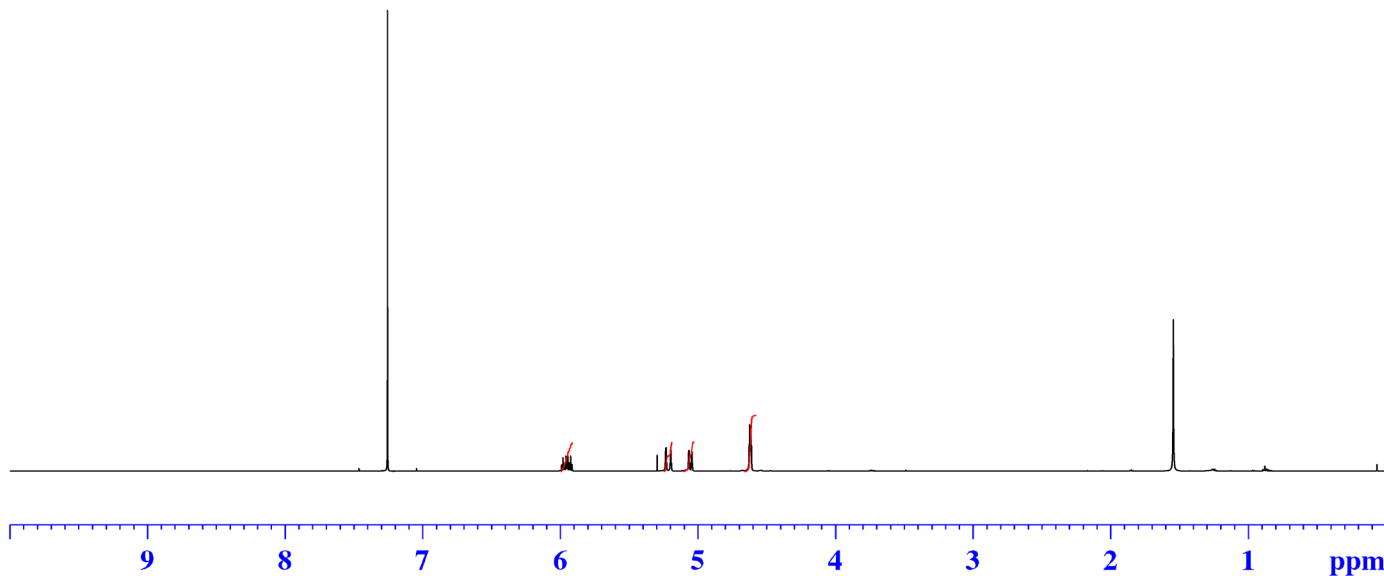

Current Data Parameters  
NAME B12(O-Allyl)12  
EXPNO 81  
PROCNO 1

F2 - Acquisition Parameters  
Date\_ 20150407  
Time 0.01  
INSTRUM av500  
PROBHD 5 mm DCH 13C-1  
PULPROG zg30  
TD 65536  
SOLVENT CDCl3  
NS 8  
DS 0  
SWH 10000.000 Hz  
FIDRES 0.152588 Hz  
AQ 3.2767999 sec  
RG 63.27  
DW 50.000 usec  
DE 10.00 usec  
TE 298.0 K  
D1 2.00000000 sec  
TD0 1

===== CHANNEL f1 =====  
SFO1 500.1330008 MHz  
NUC1 1H  
P1 10.00 usec  
PLW1 13.50000000 W  
  
F2 - Processing parameters  
SI 65536  
SF 500.1300146 MHz  
WDW EM  
SSB 0  
LB 0.30 Hz  
GB 0  
PC 1.00

12.406  
12.480  
12.636  
24.000

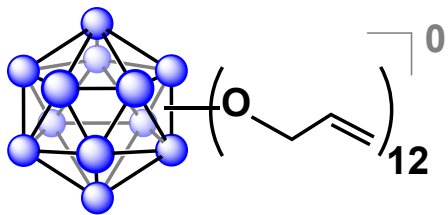

# Q Exactive High-Res Mass Spec

Alex Allyl\_1 #1 RT: 0.01 AV: 1 NL: 5.39E7  
T: FTMS - p ESI Full ms [500.00-5000.00]

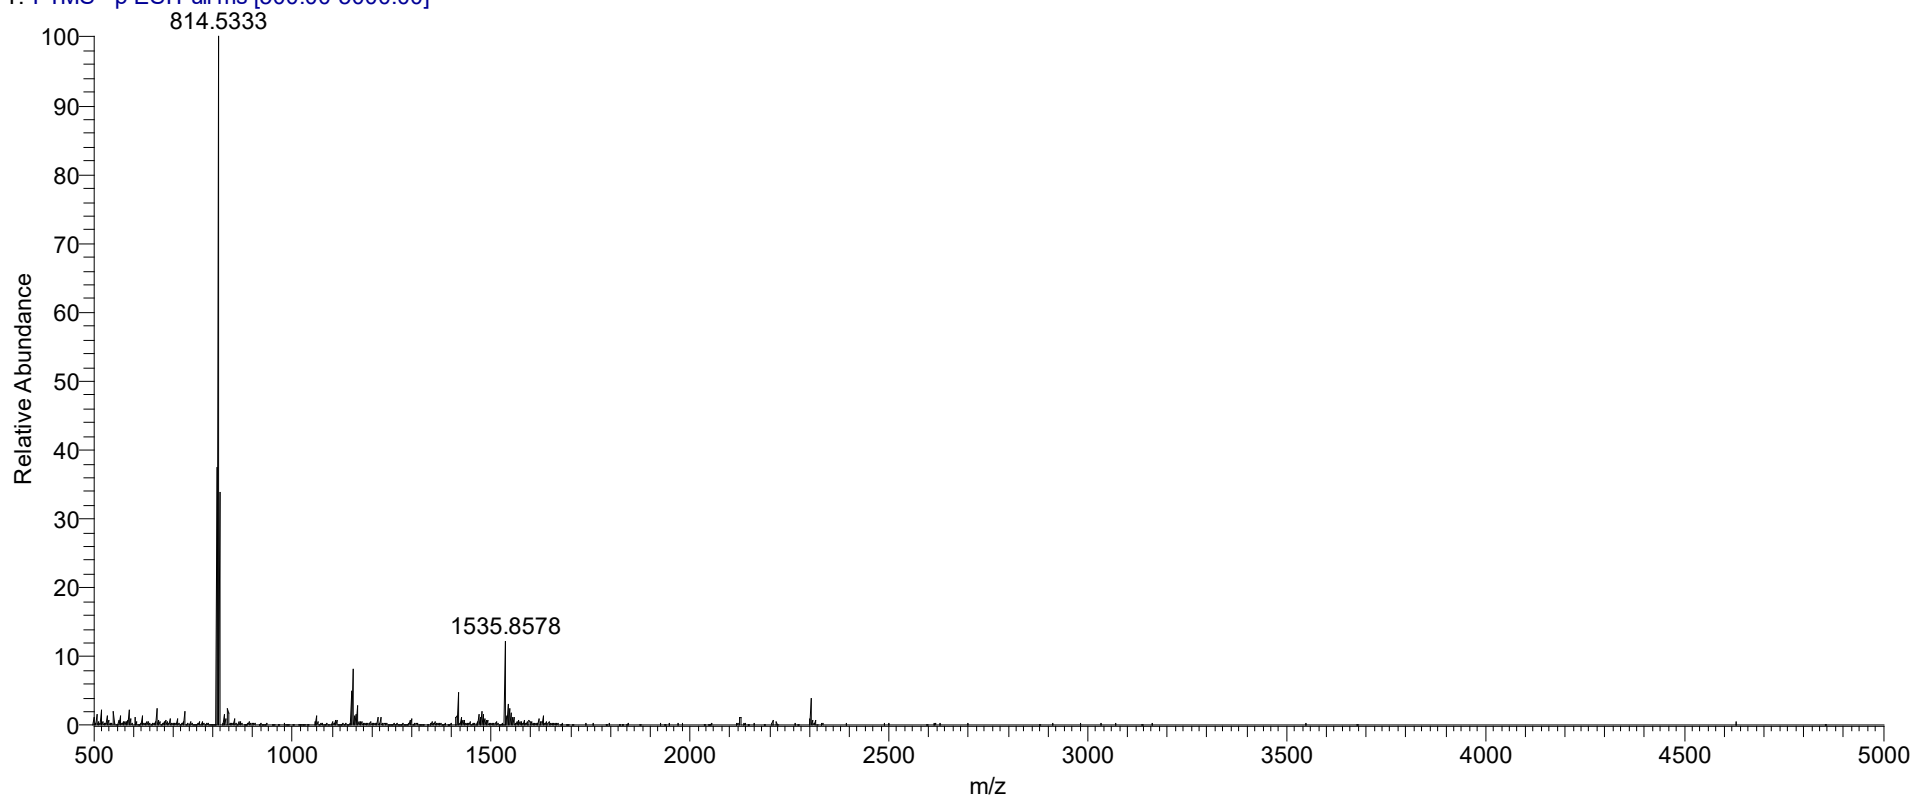





## Q Exactive High-Res Mass Spec

Alex Allyl\_1 #1 RT: 0.01 AV: 1 NL: 5.39E7  
T: FTMS - p ESI Full ms [500.00-5000.00]

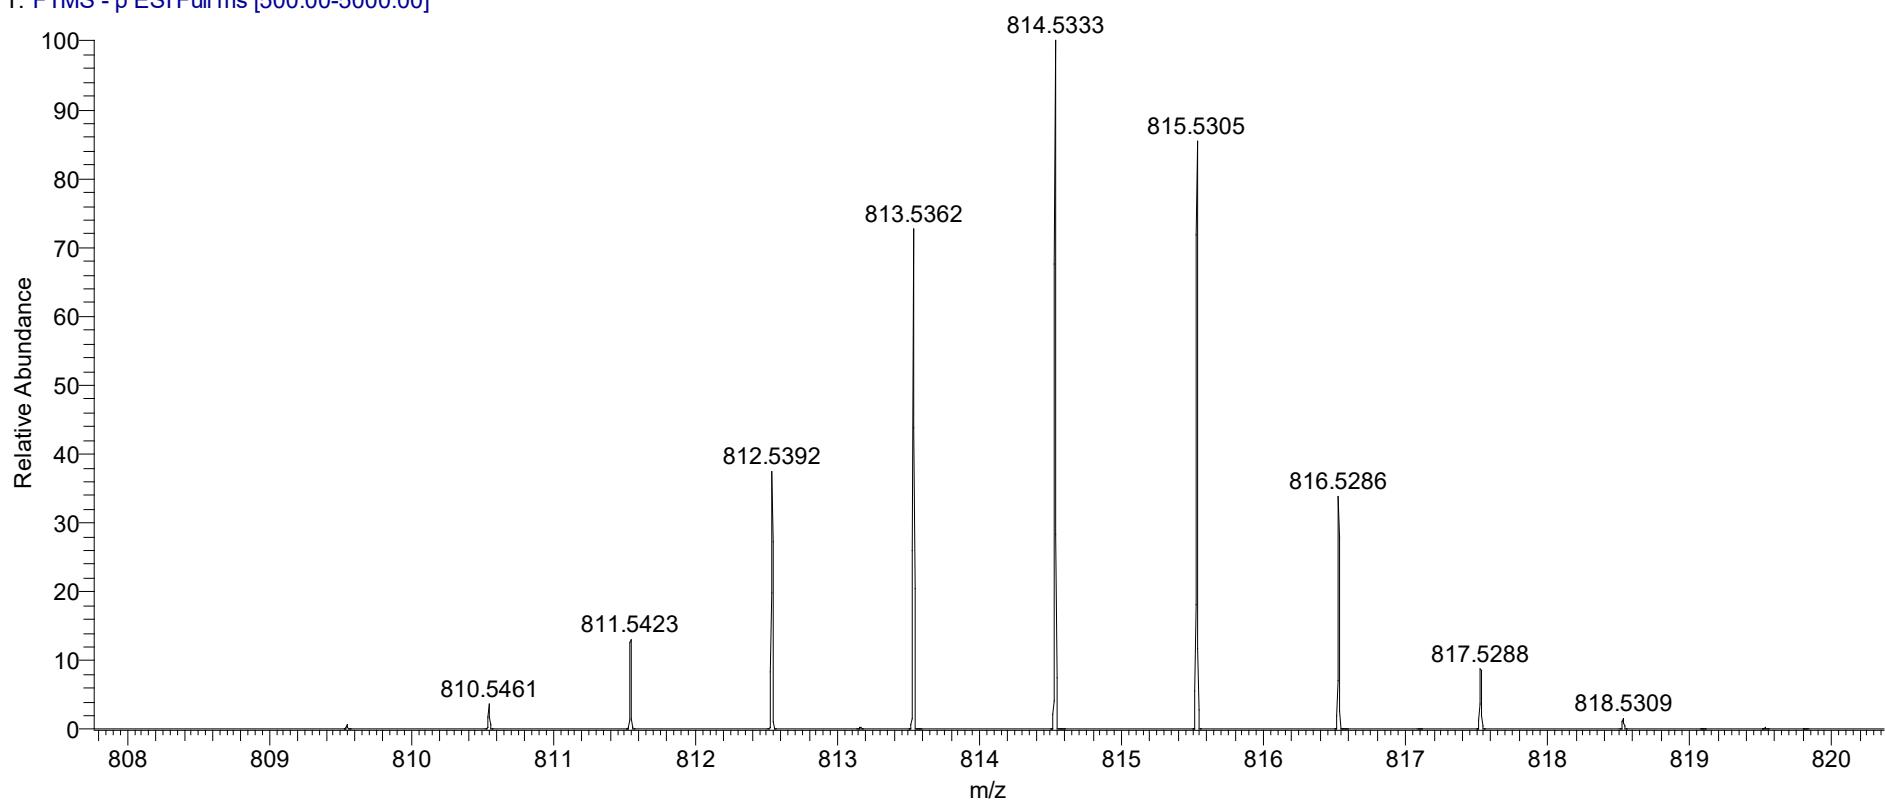

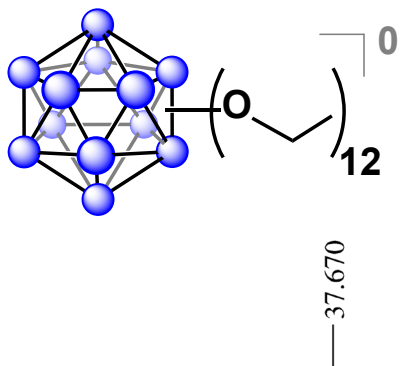

# $^{11}\text{B}$ $\{^1\text{H}\}$ NMR



Current Data Parameters  
 NAME B12(O-Et)12  
 EXPNO 100  
 PROCNO 1

F2 - Acquisition Parameters  
 Date\_ 20150412  
 Time 19.11  
 INSTRUM av400  
 PROBHD 5 mm PABBO BB/  
 PULPROG zgdc.js  
 TD 5096  
 SOLVENT CDCl3  
 NS 1024  
 DS 0  
 SWH 51020.406 Hz  
 FIDRES 10.011854 Hz  
 AQ 0.0499408 sec  
 RG 189.85  
 DW 9.800 usec  
 DE 6.50 usec  
 TE 299.1 K  
 D1 0.00000400 sec  
 D11 0.03000000 sec  
 TD0 1

===== CHANNEL f1 =====  
 SFO1 128.3776052 MHz  
 NUC1  $^{11}\text{B}$   
 P1 10.00 usec  
 PLW1 52.00000000 W

===== CHANNEL f2 =====  
 SFO2 400.1324008 MHz  
 NUC2  $^1\text{H}$   
 CPDPRG[2] waltz16  
 PCPD2 90.00 usec  
 PLW2 13.00000000 W  
 PLW12 0.36111000 W

F2 - Processing parameters  
 SI 32768  
 SF 128.3776050 MHz  
 WDW EM  
 SSB 0  
 LB 50.00 Hz  
 GB 0  
 PC 1.40

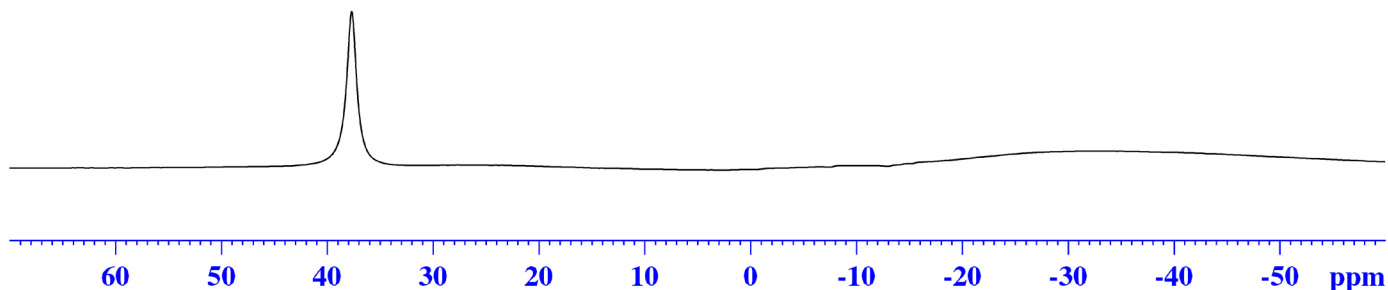

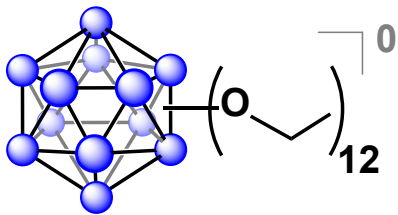

# <sup>13</sup>C NMR

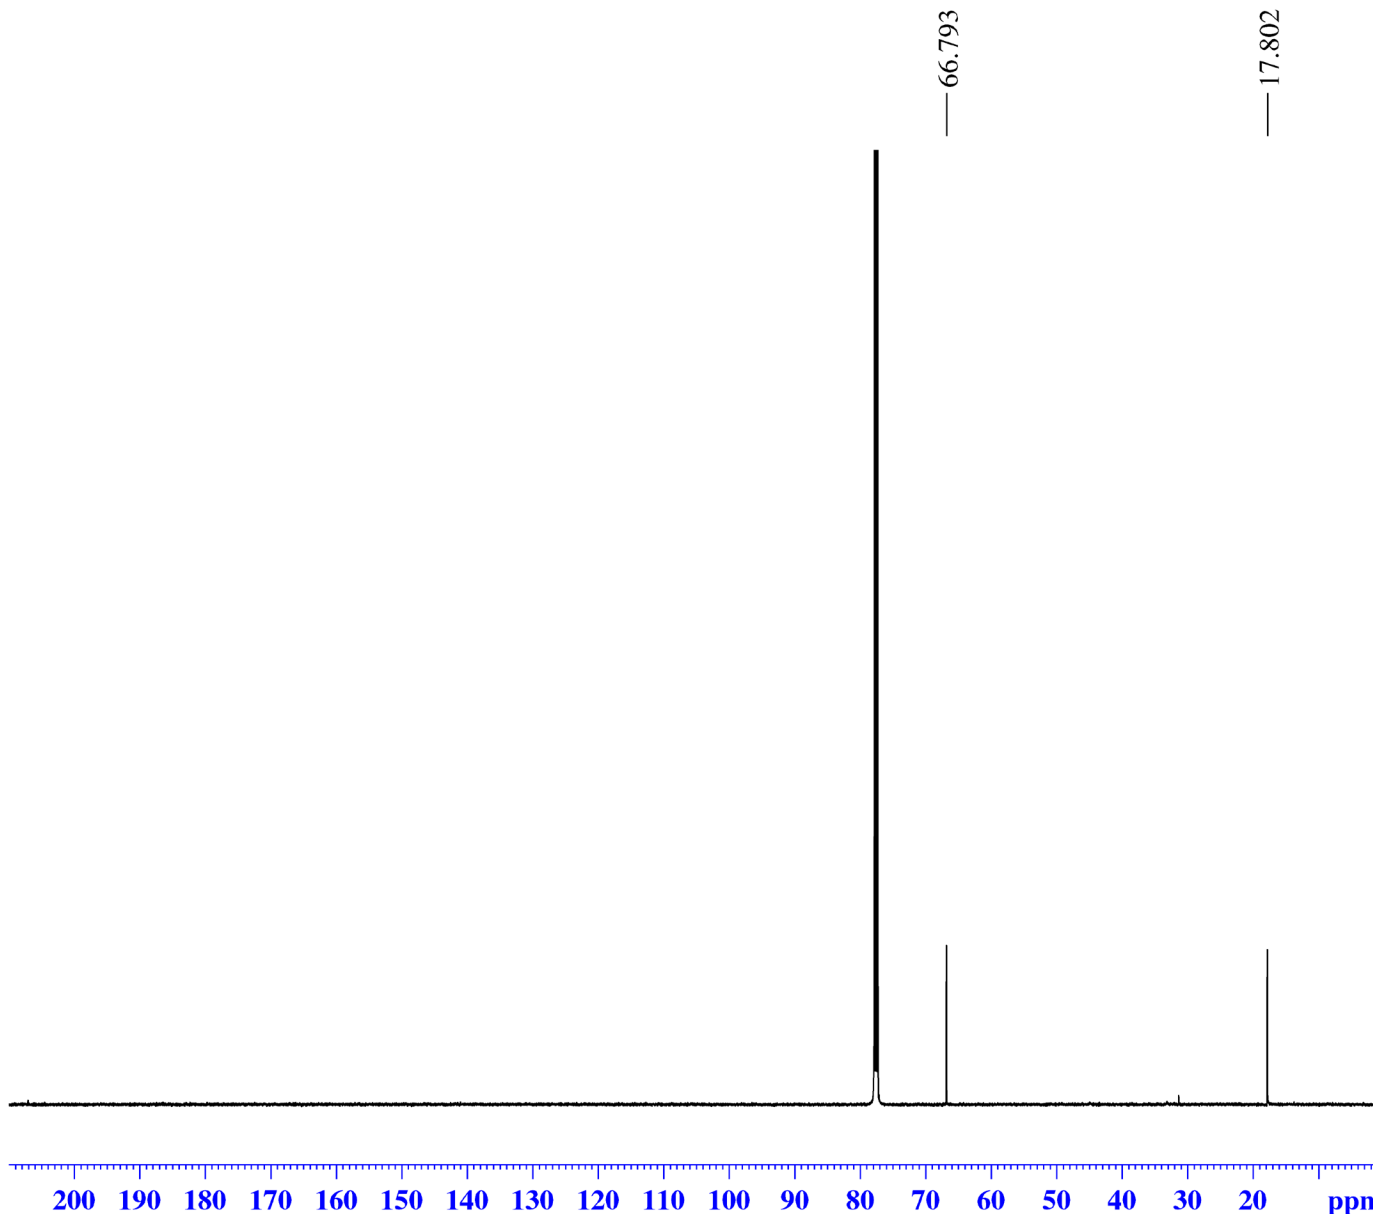

Current Data Parameters  
 NAME B12(O-Et)12  
 EXPNO 10  
 PROCNO 1

F2 - Acquisition Parameters  
 Date\_ 20150420  
 Time 21.23  
 INSTRUM av500  
 PROBHD 5 mm DCH 13C-1  
 PULPROG zgpg30  
 TD 65536  
 SOLVENT CDCl3  
 NS 64  
 DS 2  
 SWH 31250.000 Hz  
 FIDRES 0.476837 Hz  
 AQ 1.0485760 sec  
 RG 204.54  
 DW 16.000 usec  
 DE 18.00 usec  
 TE 298.0 K  
 D1 2.00000000 sec  
 D11 0.03000000 sec  
 TD0 1

===== CHANNEL f1 =====  
 SFO1 125.7722511 MHz  
 NUC1 13C  
 P1 9.63 usec  
 PLW1 23.00000000 W

===== CHANNEL f2 =====  
 SFO2 500.1330008 MHz  
 NUC2 1H  
 CPDPRG[2] waltz16  
 PCPD2 80.00 usec  
 PLW2 13.50000000 W  
 PLW12 0.21094000 W  
 PLW13 0.13500001 W

F2 - Processing parameters  
 SI 131072  
 SF 125.7577890 MHz  
 WDW EM  
 SSB 0  
 LB 1.00 Hz  
 GB 0  
 PC 1.40

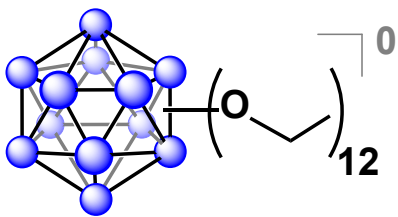

# <sup>1</sup>H NMR



4.109  
4.095  
4.081  
4.068

1.249  
1.235  
1.221

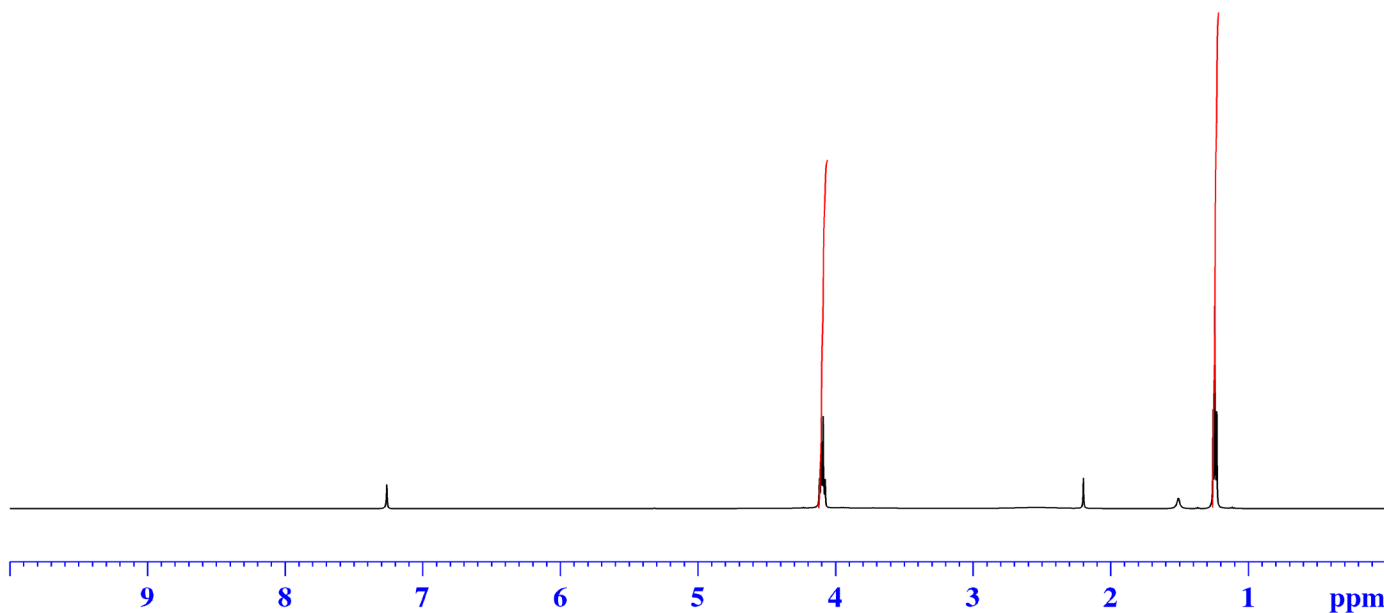

24.000

34.196

Current Data Parameters  
NAME B12(O-Et)12  
EXPNO 11  
PROCNO 1

F2 - Acquisition Parameters  
Date\_ 20150420  
Time 21.30  
INSTRUM av500  
PROBHD 5 mm DCH 13C-1  
PULPROG zg30  
TD 65536  
SOLVENT CDCl3  
NS 64  
DS 0  
SWH 10000.000 Hz  
FIDRES 0.152588 Hz  
AQ 3.2767999 sec  
RG 52.41  
DW 50.000 usec  
DE 10.00 usec  
TE 298.0 K  
D1 2.00000000 sec  
TD0 1

===== CHANNEL f1 =====  
SFO1 500.1330008 MHz  
NUC1 1H  
P1 10.00 usec  
PLW1 13.50000000 W

F2 - Processing parameters  
SI 65536  
SF 500.1300115 MHz  
WDW EM  
SSB 0  
LB 0.30 Hz  
GB 0  
PC 1.00

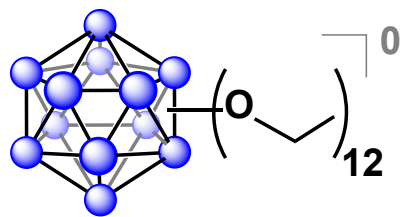

# Q Exactive High-Res Mass Spec

Et #1 RT: 0.01 AV: 1 NL: 4.63E6  
T: FTMS - p ESI Full ms [300.00-1200.00]

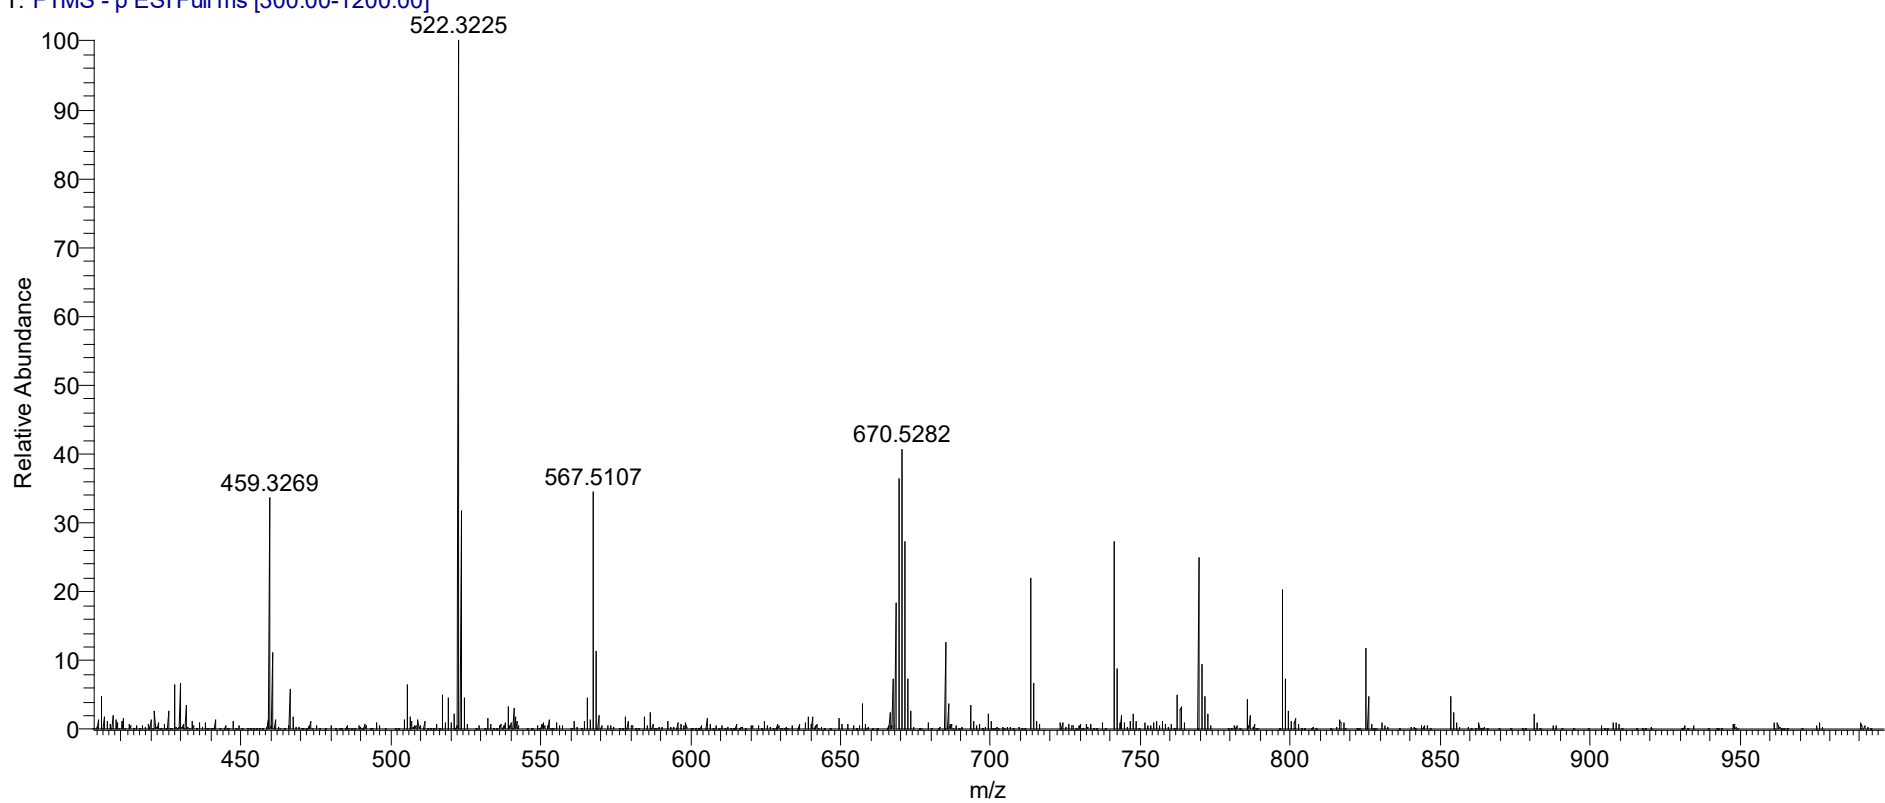

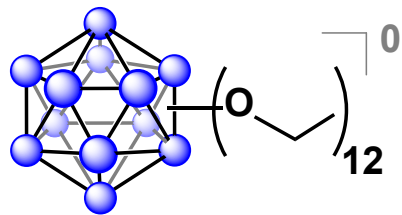

# Q Exactive High-Res Mass Spec

Et #1 RT: 0.01 AV: 1 NL: 1.89E6  
T: FTMS - p ESI Full ms [300.00-1200.00]

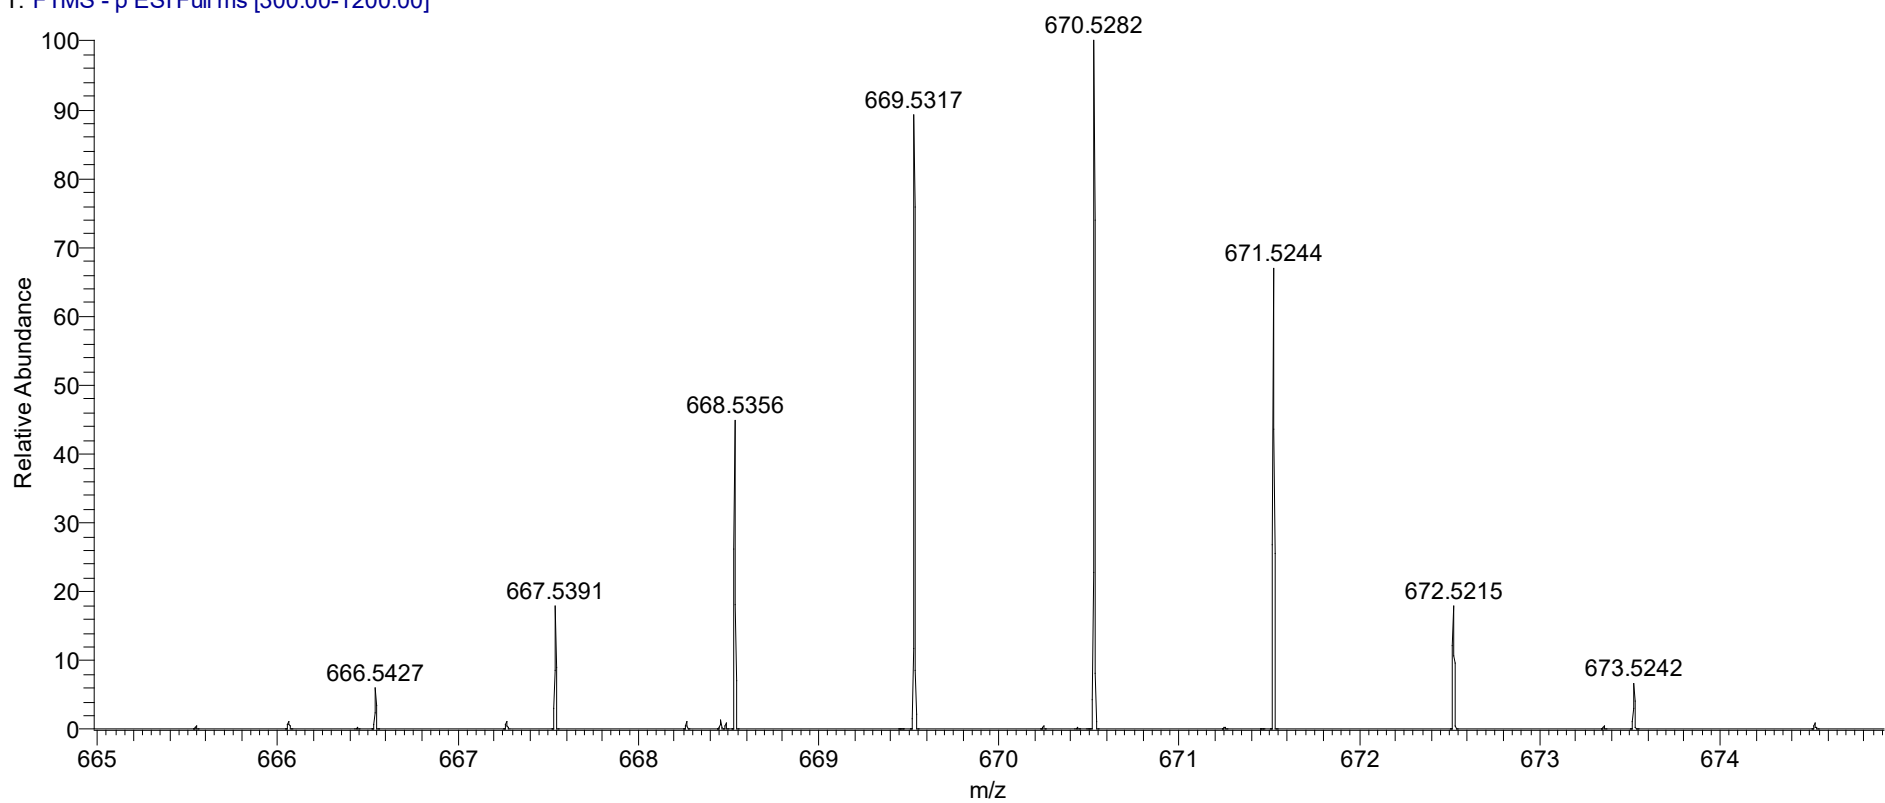

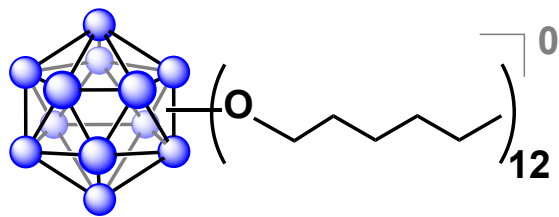

—41.983

# $^{11}\text{B}$ $\{^1\text{H}\}$ NMR



Current Data Parameters  
 NAME B12(O-Hexyl)12  
 EXPNO 20  
 PROCNO 1

F2 - Acquisition Parameters  
 Date\_ 20150610  
 Time 15.09  
 INSTRUM av400  
 PROBHD 5 mm PABBO BB/  
 PULPROG zgdc.js  
 TD 5096  
 SOLVENT CDCl3  
 NS 1024  
 DS 0  
 SWH 51020.406 Hz  
 FIDRES 10.011854 Hz  
 AQ 0.0499408 sec  
 RG 189.85  
 DW 9.800 usec  
 DE 6.50 usec  
 TE 299.2 K  
 D1 0.00000400 sec  
 D11 0.03000000 sec  
 TD0 1

===== CHANNEL f1 =====  
 SFO1 128.3776052 MHz  
 NUC1  $^{11}\text{B}$   
 P1 10.00 usec  
 PLW1 52.00000000 W

===== CHANNEL f2 =====  
 SFO2 400.1324008 MHz  
 NUC2  $^1\text{H}$   
 CPDPRG[2] waltz16  
 PCPD2 90.00 usec  
 PLW2 13.00000000 W  
 PLW12 0.36111000 W

F2 - Processing parameters  
 SI 32768  
 SF 128.3776050 MHz  
 WDW EM  
 SSB 0  
 LB 50.00 Hz  
 GB 0  
 PC 1.40

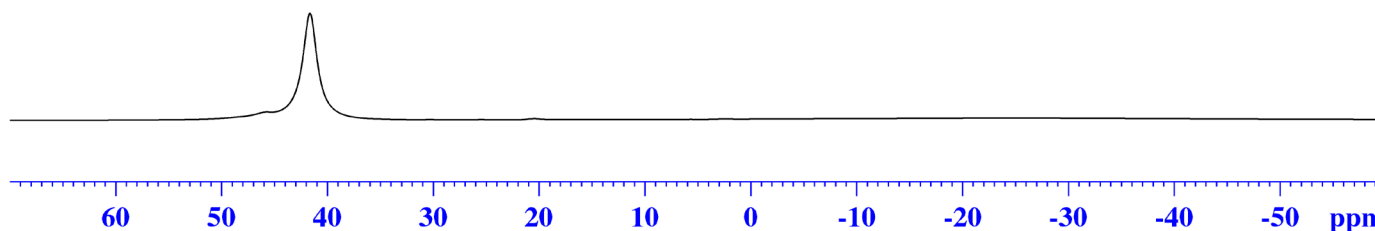

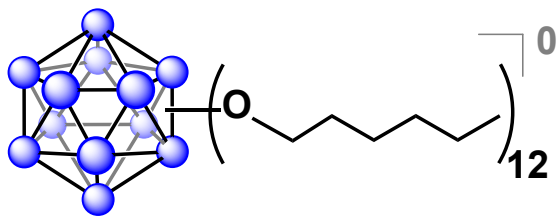

# <sup>13</sup>C NMR



— 70.232

32.206

31.792

25.854

22.778

— 14.080

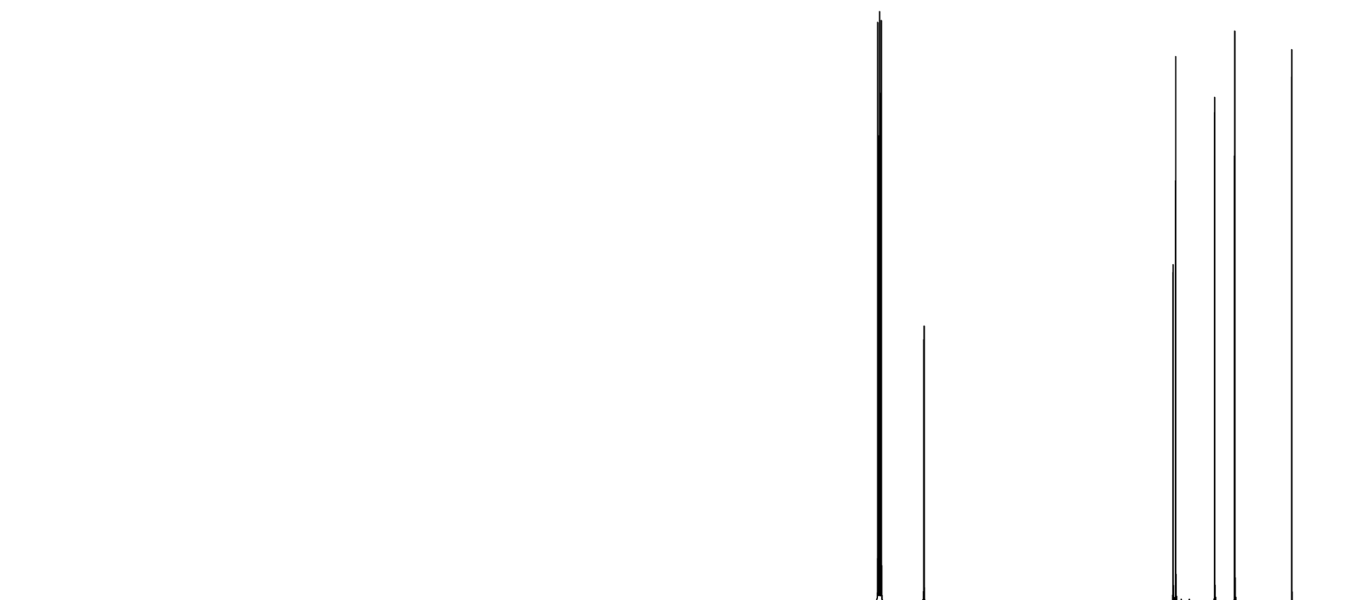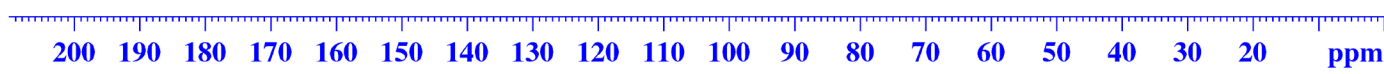

Current Data Parameters  
 NAME B12(O-Hexyl)12  
 EXPNO 200  
 PROCNO 1

F2 - Acquisition Parameters  
 Date\_ 20150829  
 Time 20.52  
 INSTRUM av500  
 PROBHD 5 mm DCH 13C-1  
 PULPROG zgpg30  
 TD 65536  
 SOLVENT CDCl3  
 NS 256  
 DS 2  
 SWH 31250.000 Hz  
 FIDRES 0.476837 Hz  
 AQ 1.0485760 sec  
 RG 204.54  
 DW 16.000 usec  
 DE 18.00 usec  
 TE 298.0 K  
 D1 2.00000000 sec  
 D11 0.03000000 sec  
 TD0 1

===== CHANNEL f1 =====  
 SFO1 125.7722511 MHz  
 NUC1 13C  
 P1 9.63 usec  
 PLW1 23.00000000 W

===== CHANNEL f2 =====  
 SFO2 500.1330008 MHz  
 NUC2 1H  
 CPDPRG[2] waltz16  
 PCPD2 80.00 usec  
 PLW2 13.50000000 W  
 PLW12 0.21094000 W  
 PLW13 0.13500001 W

F2 - Processing parameters  
 SI 131072  
 SF 125.7577890 MHz  
 WDW EM  
 SSB 0  
 LB 1.00 Hz  
 GB 0  
 PC 1.40



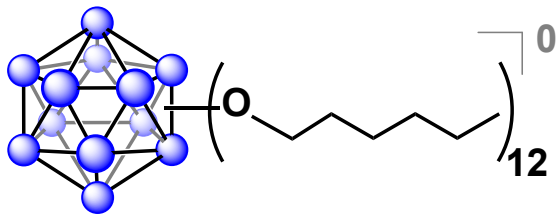

# <sup>1</sup>H NMR



4.035  
4.019  
4.003

1.554  
1.537  
1.518  
1.352  
1.333  
1.326  
1.315  
1.312  
1.289  
1.282  
1.273  
1.265

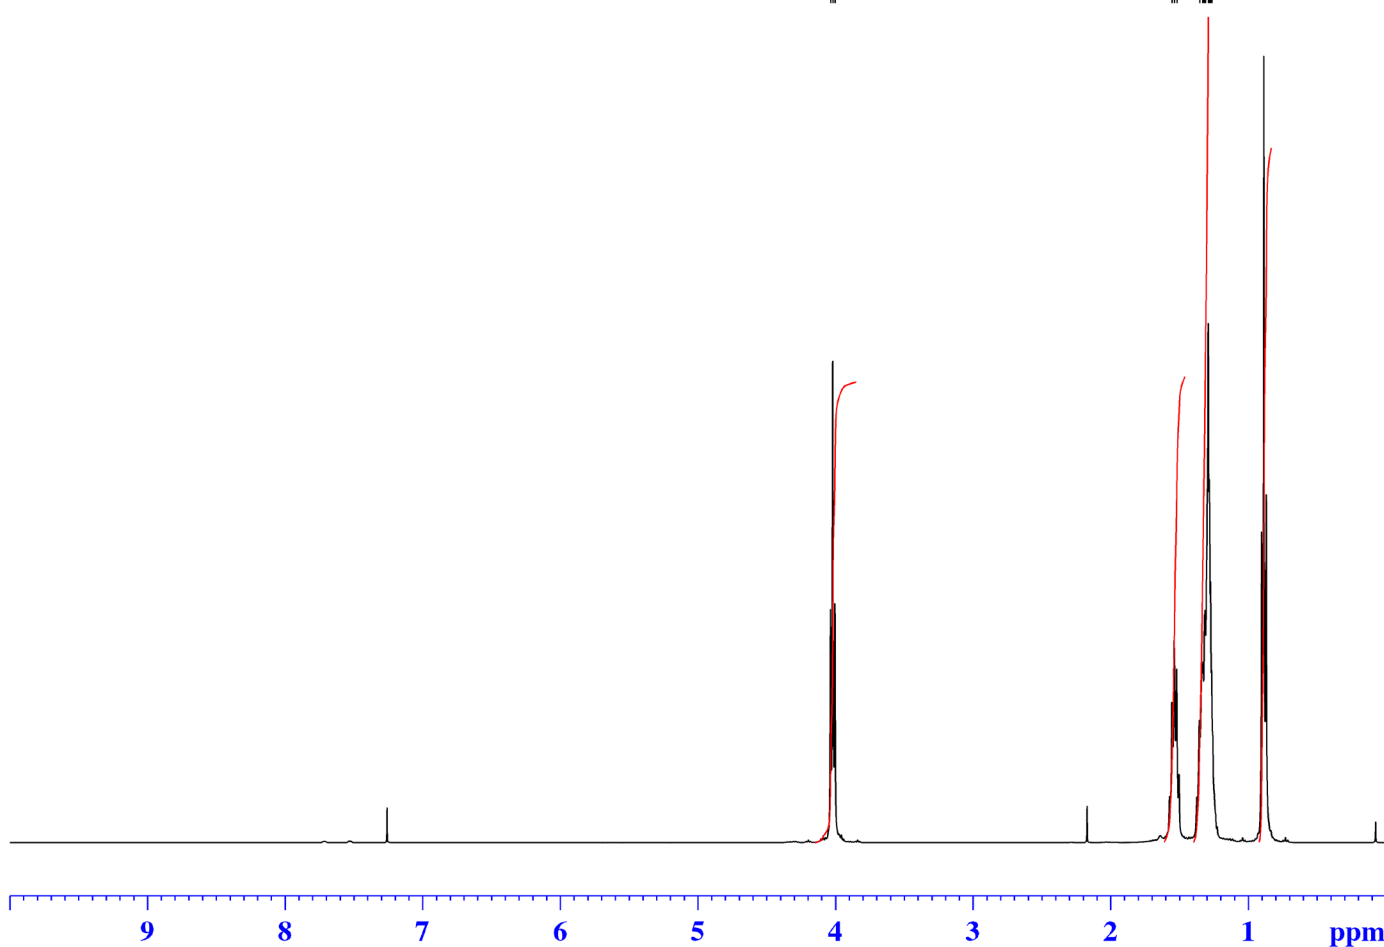

24.000

24.259  
73.560  
36.191

Current Data Parameters  
NAME Jun10-2015  
EXPNO 11  
PROCNO 1

F2 - Acquisition Parameters  
Date\_ 20150610  
Time 15.04  
INSTRUM av400  
PROBHD 5 mm PABBO BB/  
PULPROG zg30  
TD 52882  
SOLVENT CDCl3  
NS 8  
DS 0  
SWH 8012.820 Hz  
FIDRES 0.151523 Hz  
AQ 3.2998369 sec  
RG 30.37  
DW 62.400 usec  
DE 6.50 usec  
TE 299.0 K  
D1 2.00000000 sec  
TD0 1

===== CHANNEL f1 =====  
SFO1 400.1324008 MHz  
NUC1 1H  
P1 15.00 usec  
PLW1 13.00000000 W

F2 - Processing parameters  
SI 65536  
SF 400.1300184 MHz  
WDW EM  
SSB 0  
LB 0.30 Hz  
GB 0  
PC 1.00

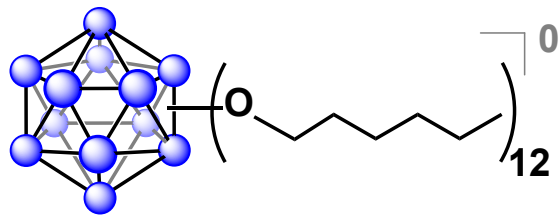

# Q Exactive High-Res Mass Spec

Hex #1 RT: 0.01 AV: 1 NL: 1.13E7  
T: FTMS - p ESI Full ms [500.00-2000.00]

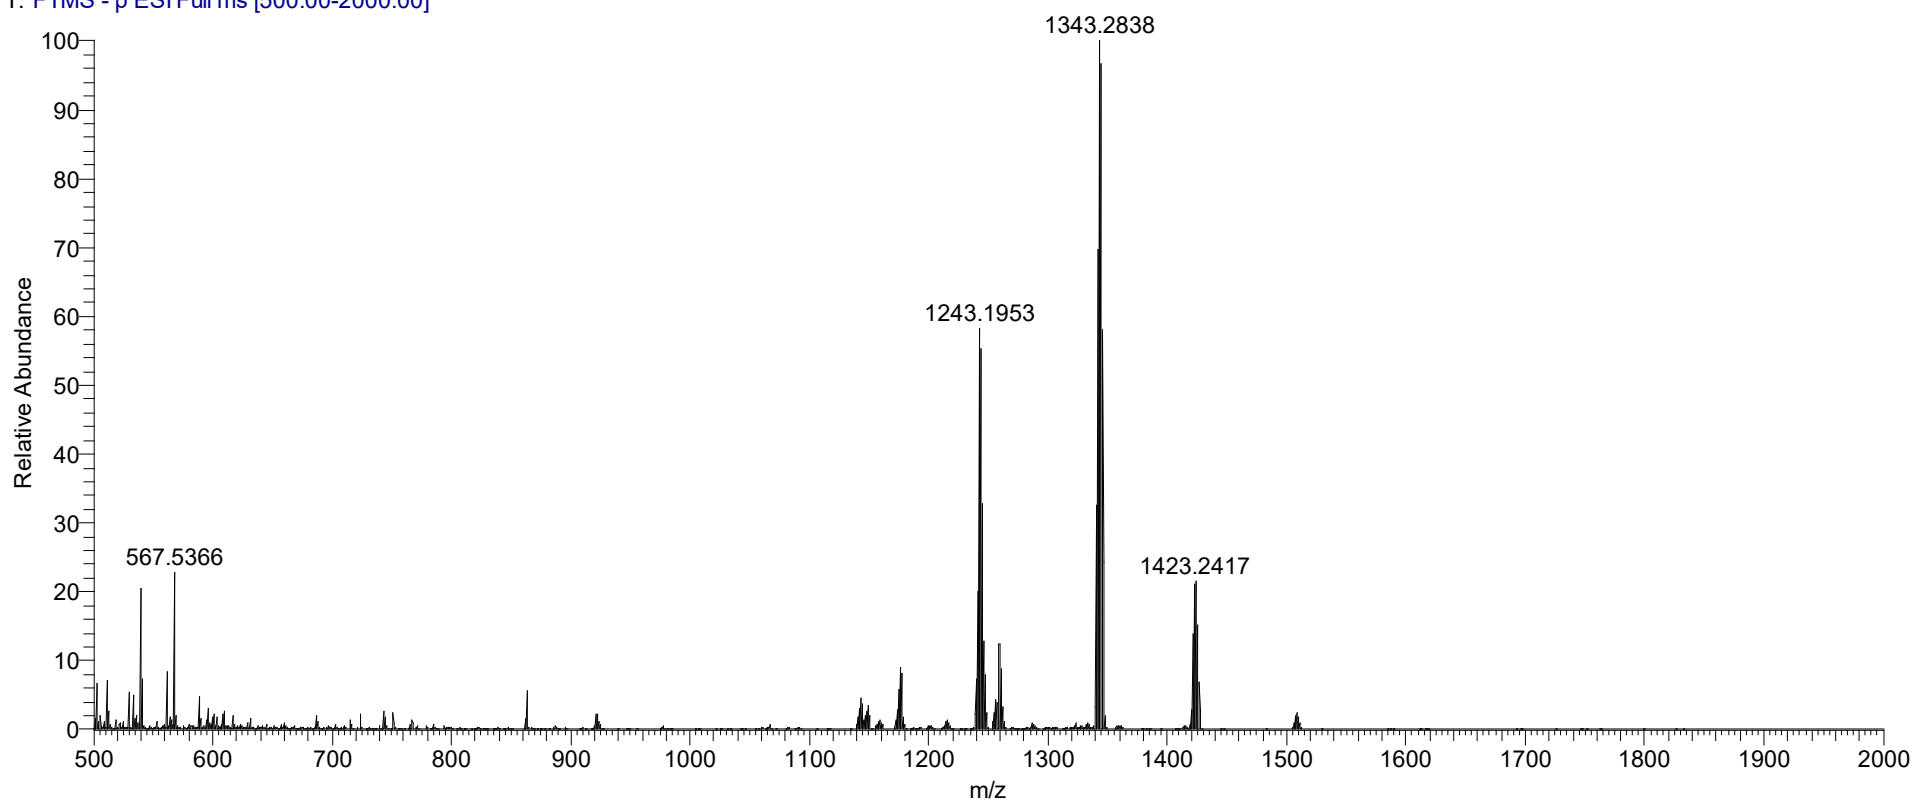



# Q Exactive High-Res Mass Spec

Hex #1 RT: 0.01 AV: 1 NL: 1.13E7  
T: FTMS - p ESI Full ms [500.00-2000.00]

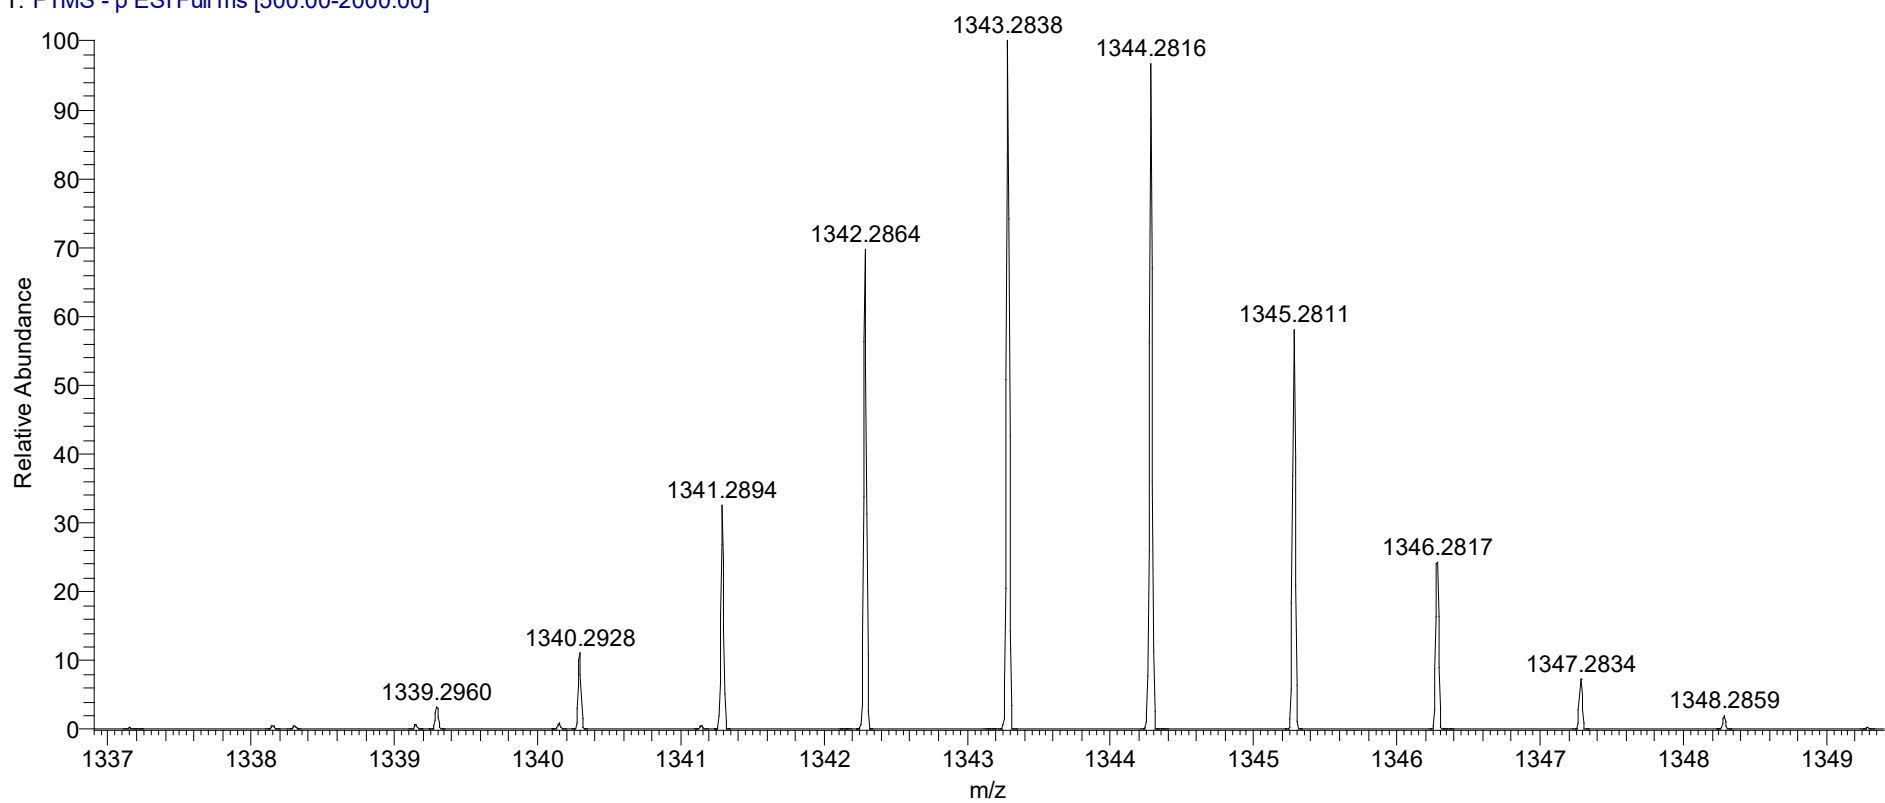

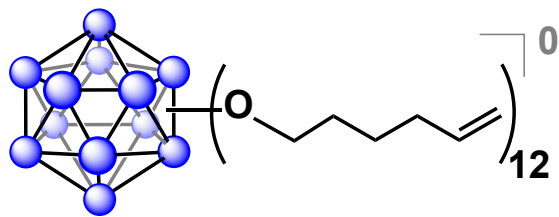

—41.607

# $^{11}\text{B}$ $\{^1\text{H}\}$ NMR



Current Data Parameters  
 NAME Oct05-2015  
 EXPNO 51  
 PROCNO 1

F2 - Acquisition Parameters  
 Date\_ 20151005  
 Time 15.01  
 INSTRUM av400  
 PROBHD 5 mm PABBO BB/  
 PULPROG zgdc.js  
 TD 5096  
 SOLVENT CDCl3  
 NS 1024  
 DS 0  
 SWH 51020.406 Hz  
 FIDRES 10.011854 Hz  
 AQ 0.0499408 sec  
 RG 189.85  
 DW 9.800 usec  
 DE 6.50 usec  
 TE 299.1 K  
 D1 0.05000000 sec  
 D11 0.03000000 sec  
 TD0 1

===== CHANNEL f1 =====  
 SFO1 128.3776052 MHz  
 NUC1  $^{11}\text{B}$   
 P1 10.00 usec  
 PLW1 52.00000000 W

===== CHANNEL f2 =====  
 SFO2 400.1324008 MHz  
 NUC2  $^1\text{H}$   
 CPDPRG[2] waltz16  
 PCPD2 90.00 usec  
 PLW2 13.00000000 W  
 PLW12 0.36111000 W

F2 - Processing parameters  
 SI 32768  
 SF 128.3776161 MHz  
 WDW EM  
 SSB 0  
 LB 10.00 Hz  
 GB 0  
 PC 1.40

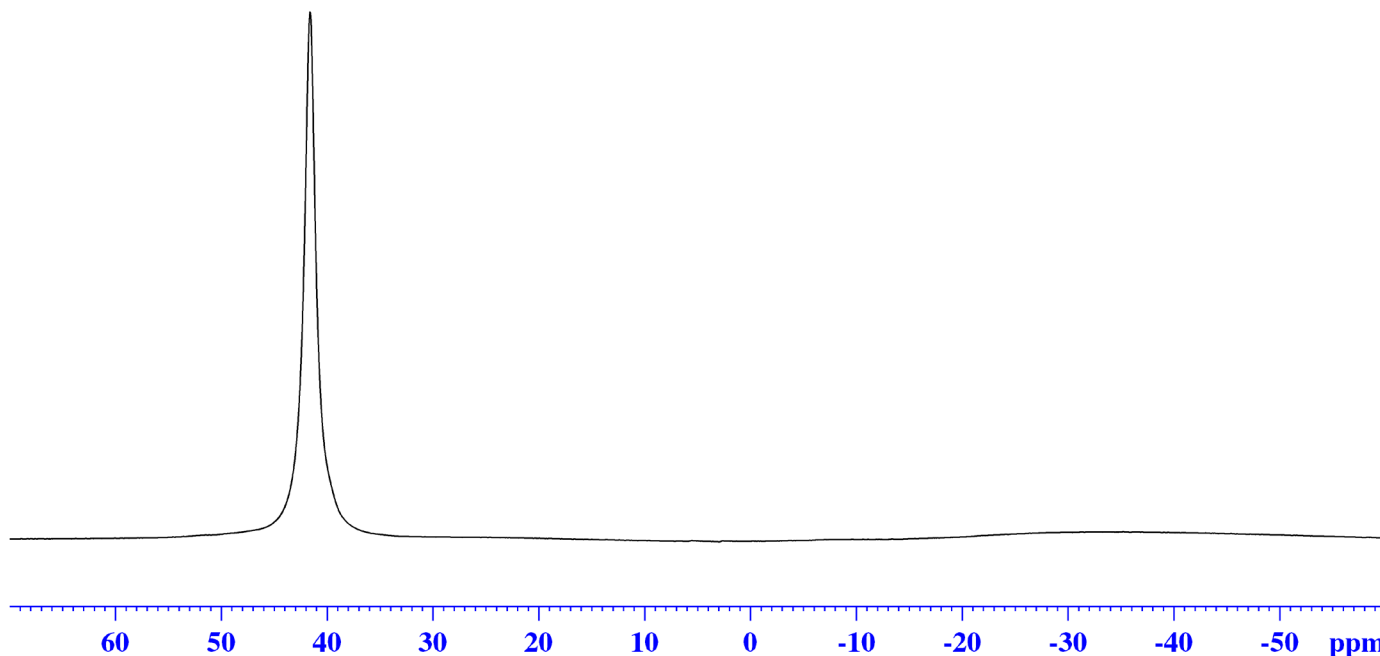

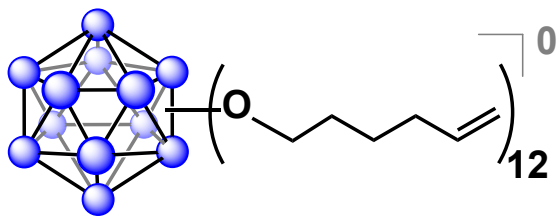

# <sup>13</sup>C NMR

— 139.053

— 114.229

— 70.049

— 33.566

— 31.647

— 25.474



Current Data Parameters  
 NAME B12(O-Hexene)12  
 EXPNO 20  
 PROCNO 1

F2 - Acquisition Parameters  
 Date\_ 20151021  
 Time 17.44  
 INSTRUM av500  
 PROBHD 5 mm DCH 13C-1  
 PULPROG zgpg30  
 TD 65536  
 SOLVENT CDCl3  
 NS 256  
 DS 2  
 SWH 31250.000 Hz  
 FIDRES 0.476837 Hz  
 AQ 1.0485760 sec  
 RG 204.54  
 DW 16.000 usec  
 DE 18.00 usec  
 TE 298.0 K  
 D1 2.00000000 sec  
 D11 0.03000000 sec  
 TD0 1

===== CHANNEL f1 =====  
 SFO1 125.7722511 MHz  
 NUC1 13C  
 P1 9.63 usec  
 PLW1 23.00000000 W

===== CHANNEL f2 =====  
 SFO2 500.1330008 MHz  
 NUC2 1H  
 CPDPRG[2] waltz16  
 PCPD2 80.00 usec  
 PLW2 13.50000000 W  
 PLW12 0.21094000 W  
 PLW13 0.13500001 W

F2 - Processing parameters  
 SI 131072  
 SF 125.7577890 MHz  
 WDW EM  
 SSB 0  
 LB 1.00 Hz  
 GB 0  
 PC 1.40

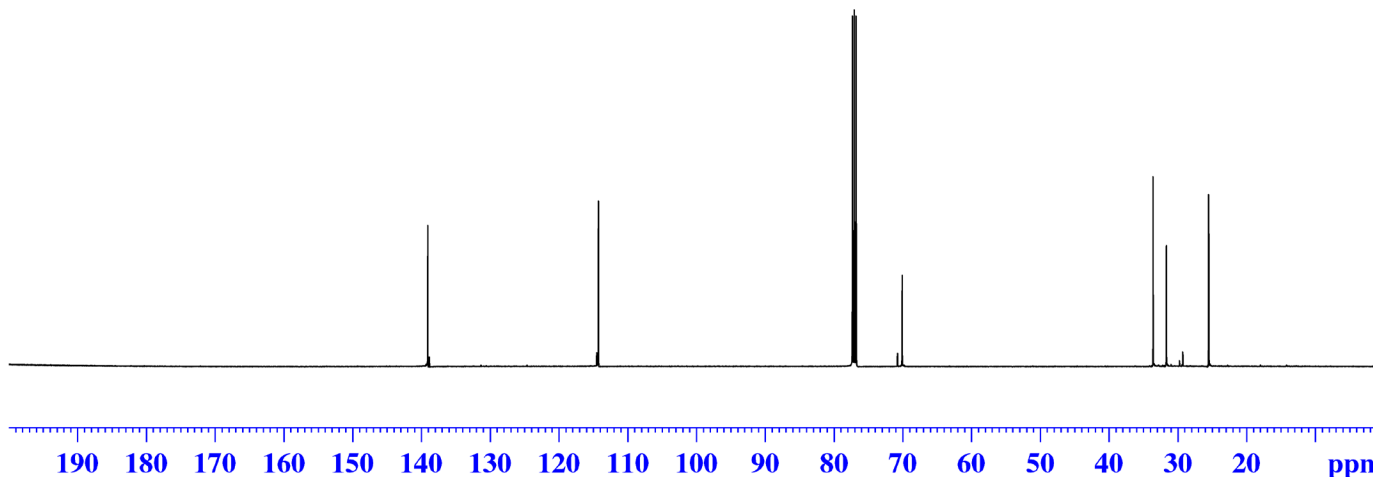

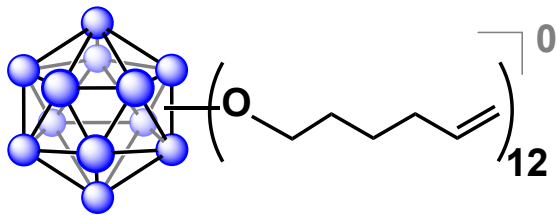

# <sup>1</sup>H NMR

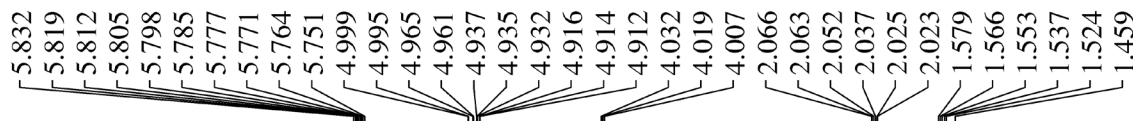

Current Data Parameters  
 NAME B12(O-Hexene)12  
 EXPNO 21  
 PROCNO 1

F2 - Acquisition Parameters  
 Date\_ 20151021  
 Time 17.48  
 INSTRUM av500  
 PROBHD 5 mm DCH 13C-1  
 PULPROG zg30  
 TD 65536  
 SOLVENT CDCl3  
 NS 32  
 DS 0  
 SWH 10000.000 Hz  
 FIDRES 0.152588 Hz  
 AQ 3.2767999 sec  
 RG 33.91  
 DW 50.000 usec  
 DE 10.00 usec  
 TE 298.0 K  
 D1 2.00000000 sec  
 TD0 1

===== CHANNEL f1 =====  
 SFO1 500.1330008 MHz  
 NUC1 1H  
 P1 10.00 usec  
 PLW1 13.50000000 W

F2 - Processing parameters  
 SI 65536  
 SF 500.1300146 MHz  
 WDW EM  
 SSB 0  
 LB 0.30 Hz  
 GB 0  
 PC 1.00

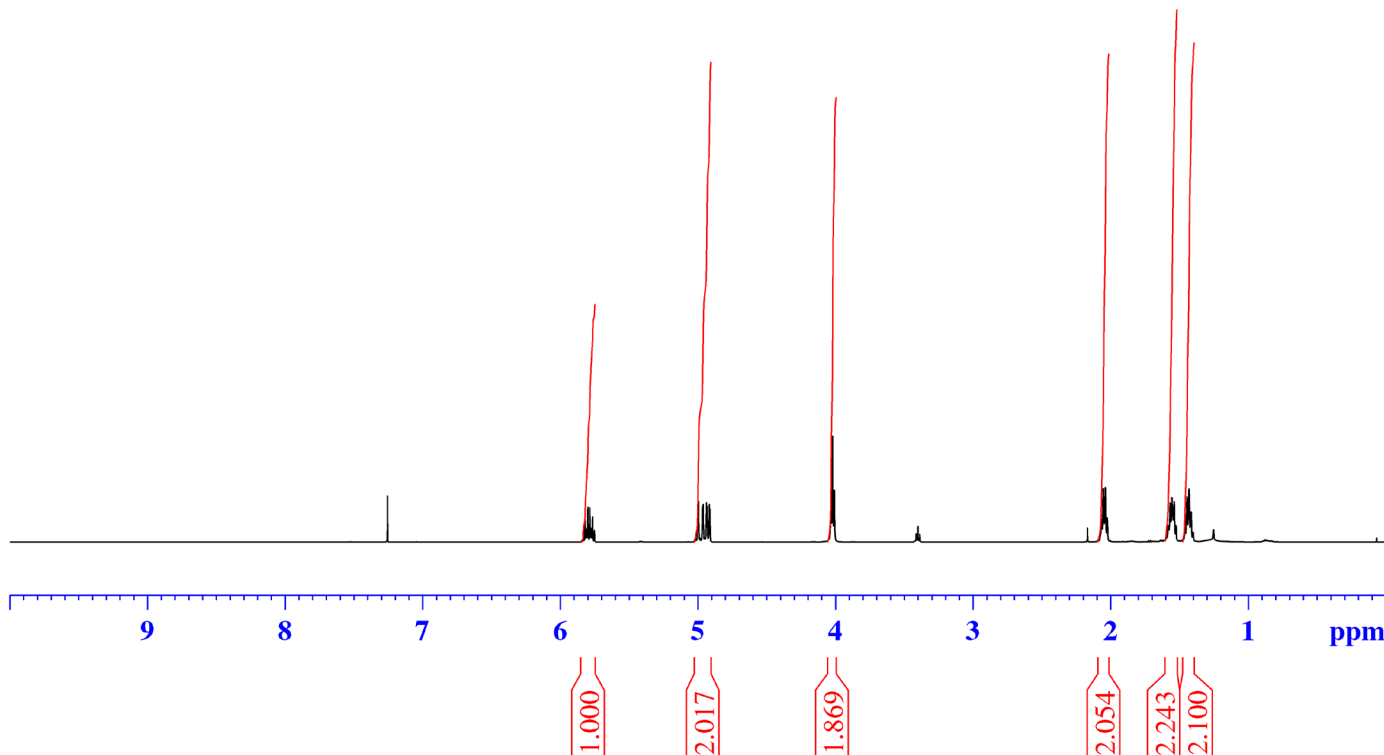

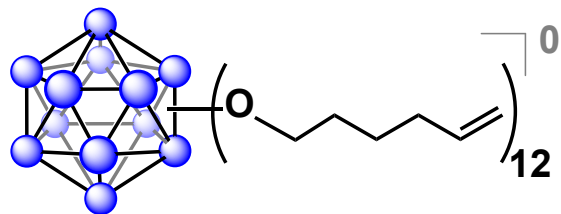

## Q Exactive High-Res Mass Spec

Hexene #1 RT: 0.01 AV: 1 NL: 6.90E5  
T: FTMS - p ESI Full ms [500.00-2000.00]

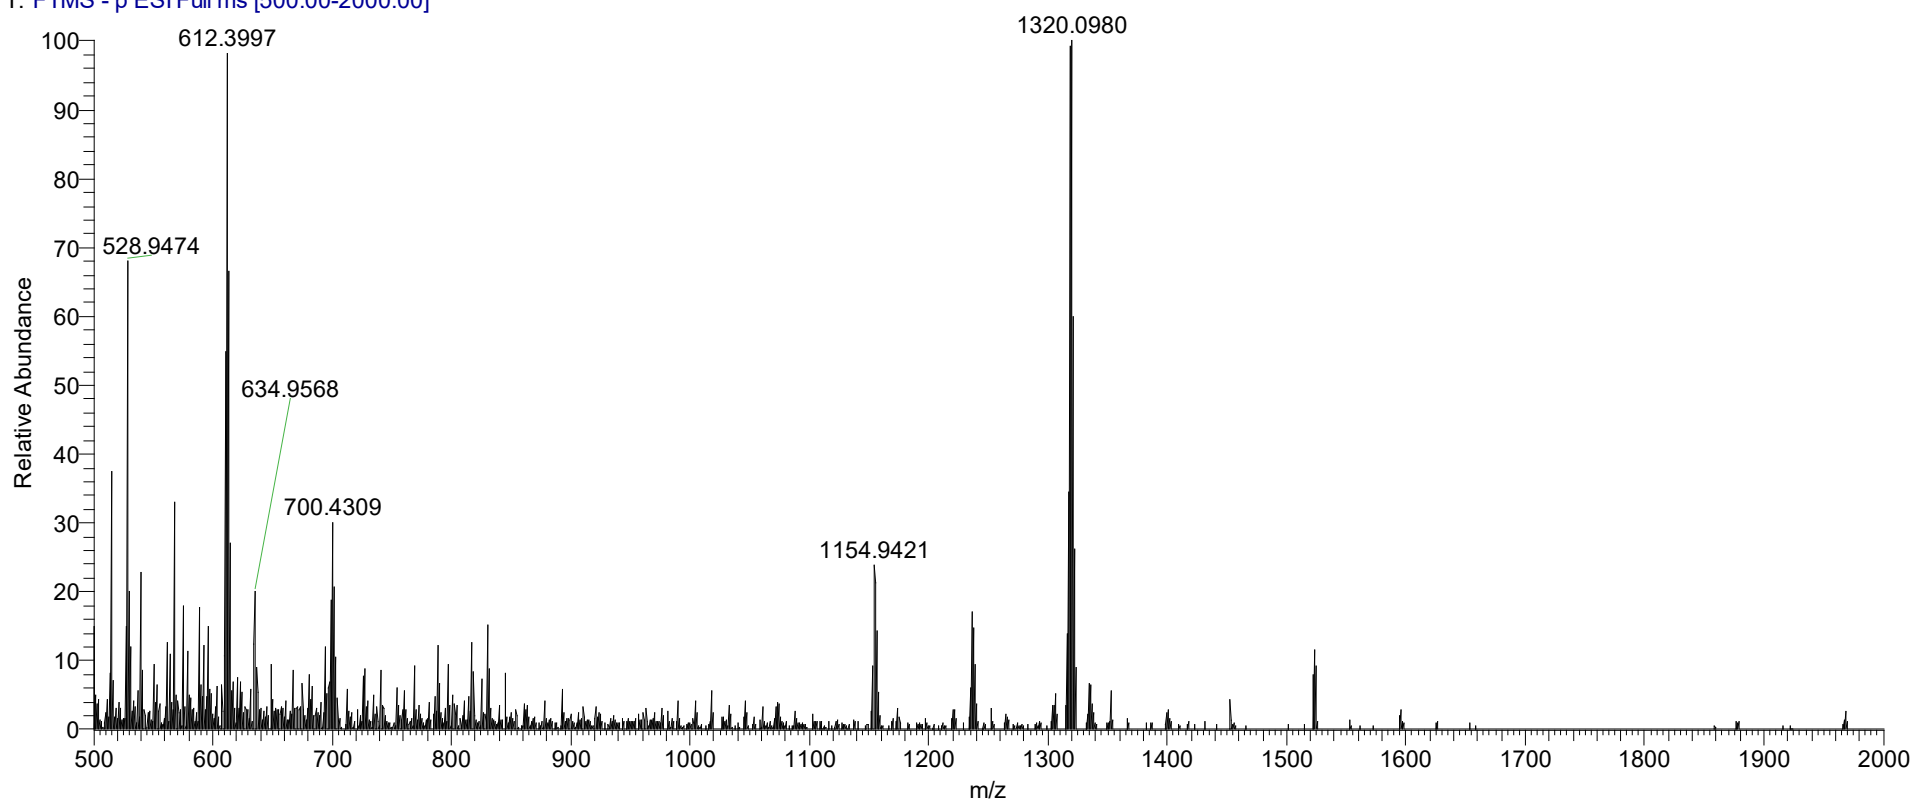



## Q Exactive High-Res Mass Spec

Hexene #1 RT: 0.01 AV: 1 NL: 6.90E5  
T: FTMS - p ESI Full ms [500.00-2000.00]

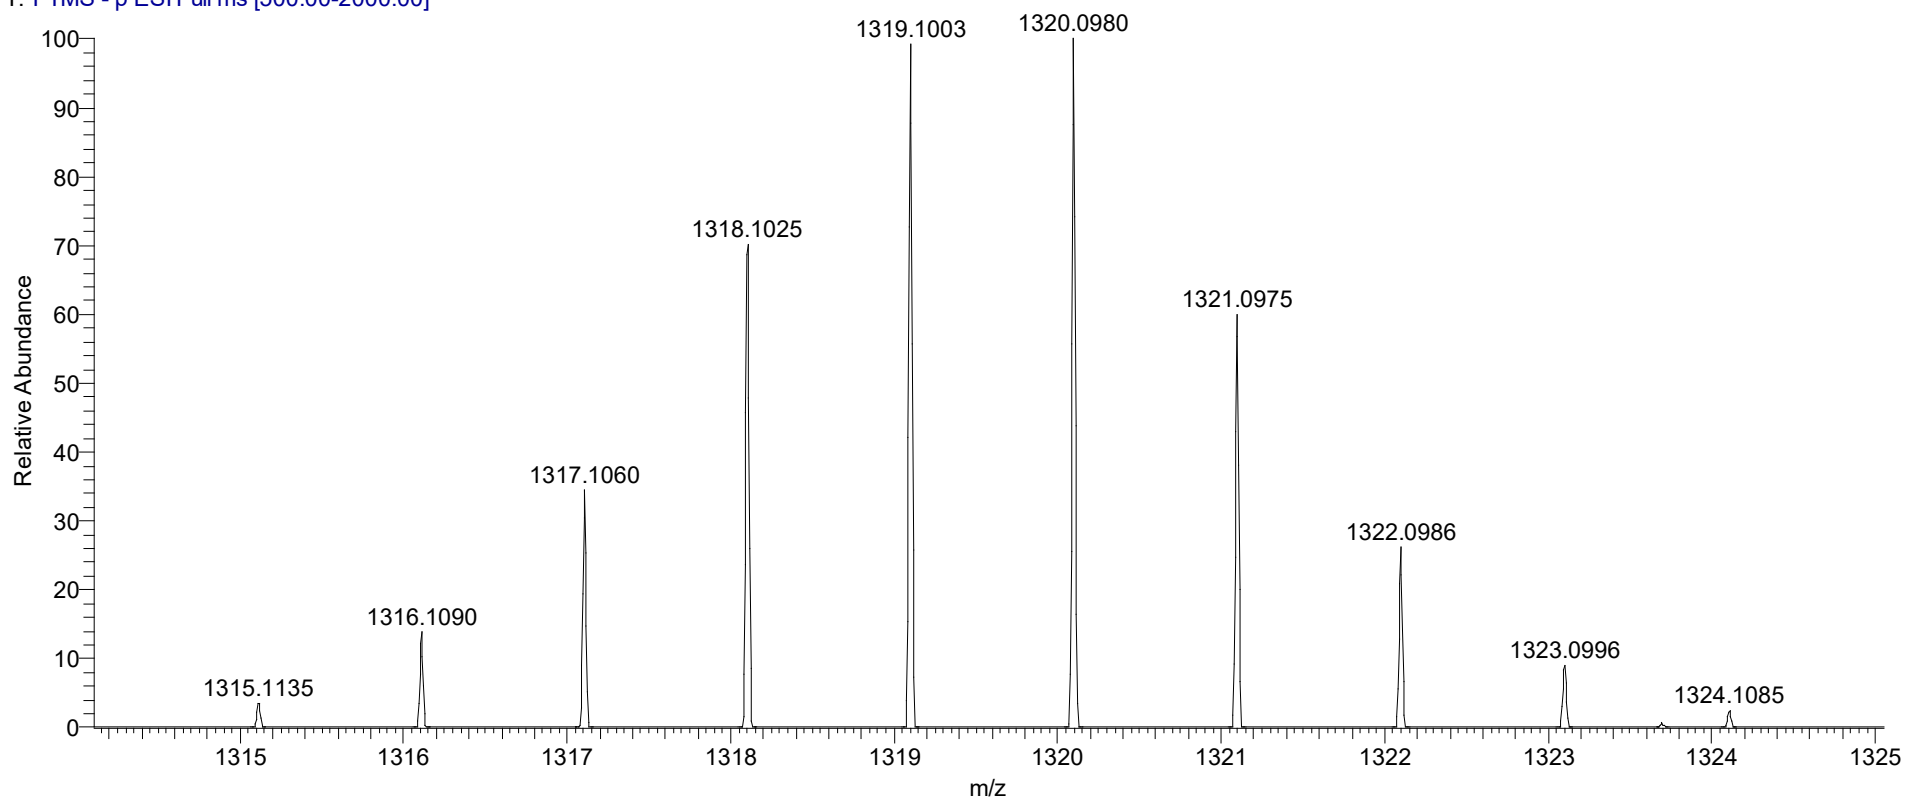



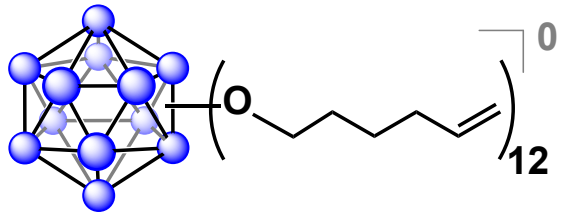

IR

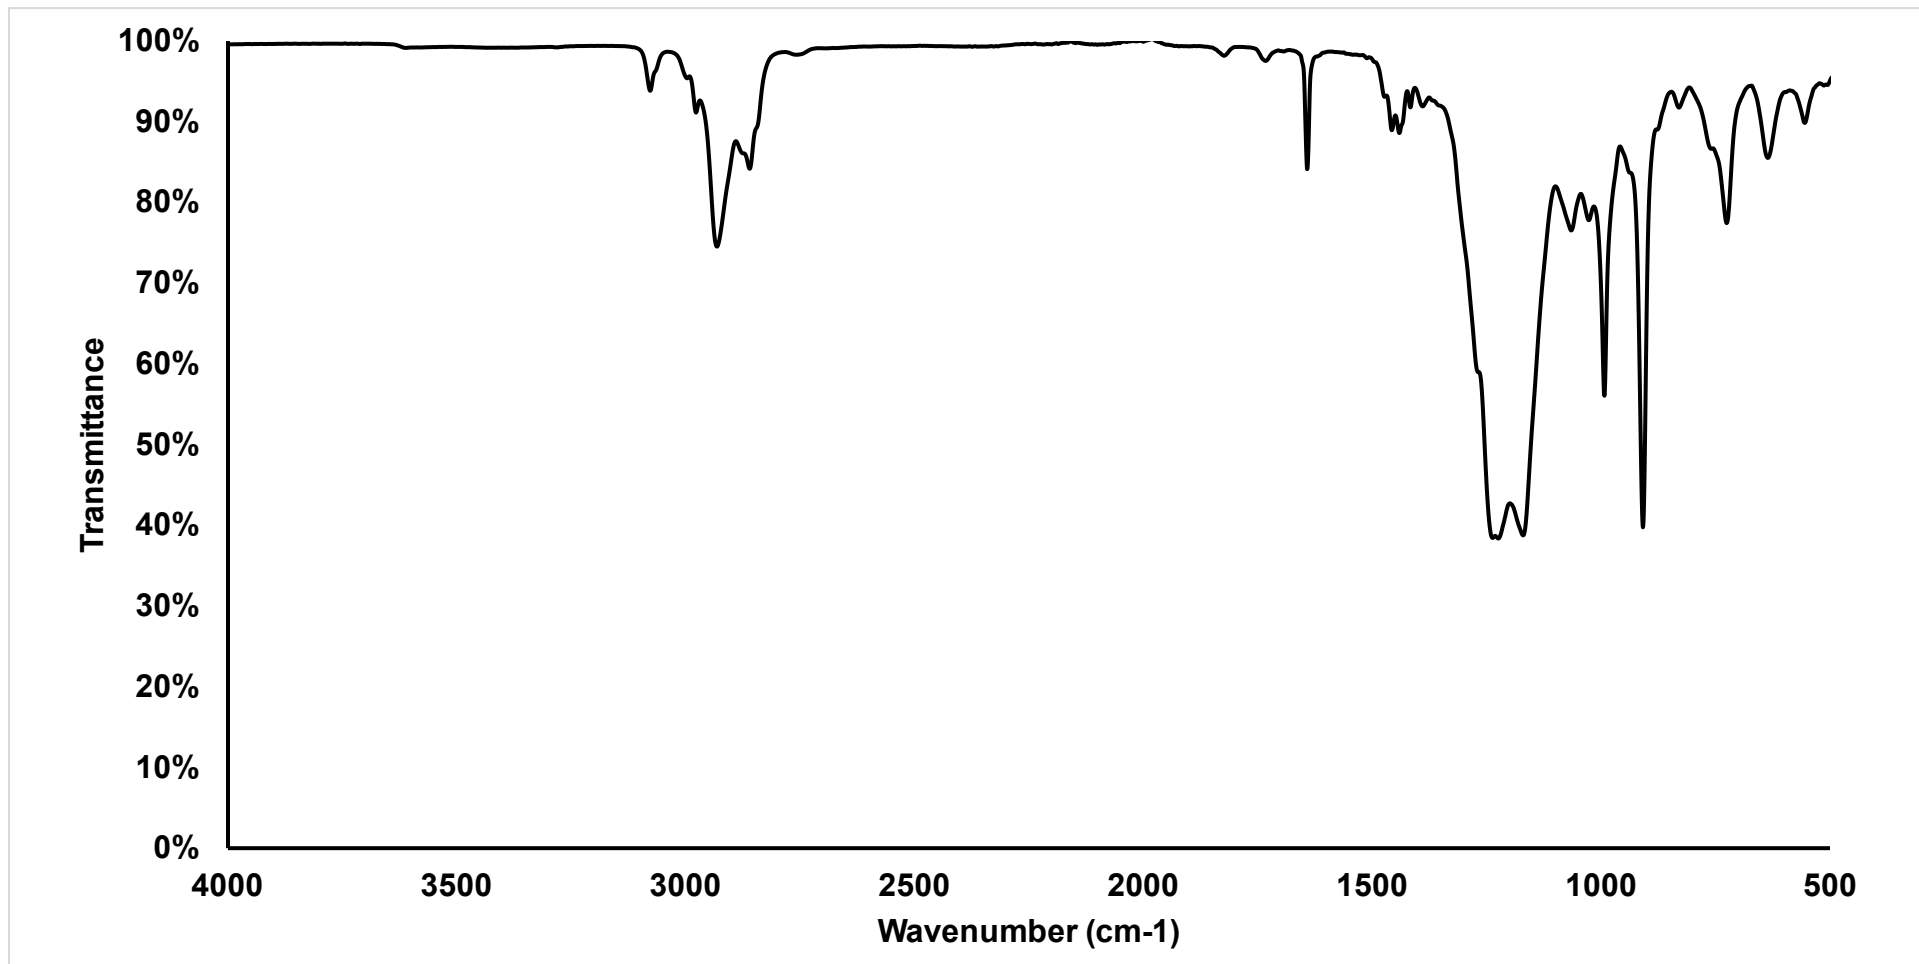

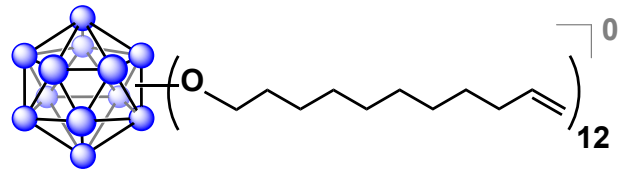

# $^{11}\text{B}$ $\{^1\text{H}\}$ NMR

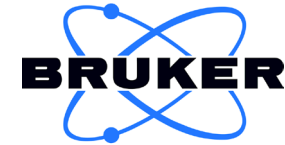

—41.474

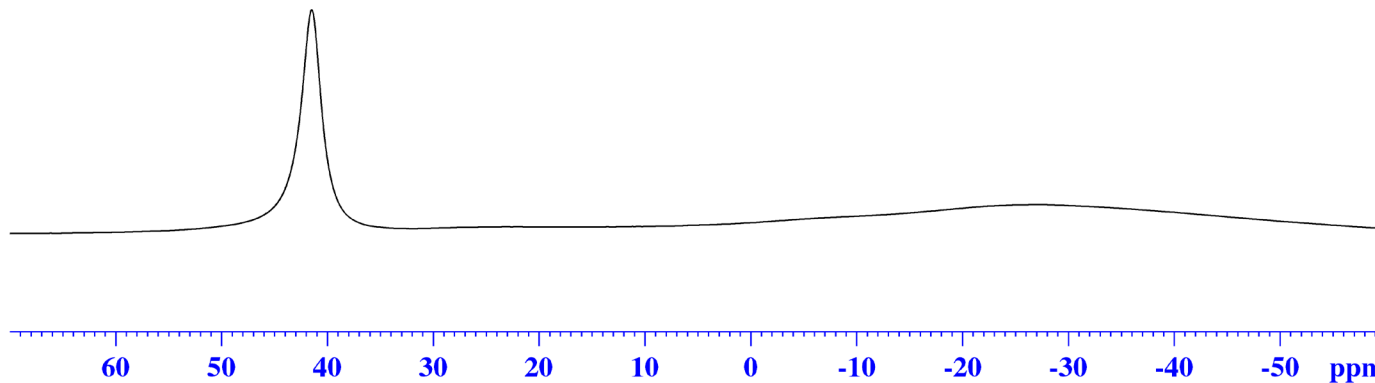

Current Data Parameters  
 NAME B12(O-1-undecene)12  
 EXPNO 20  
 PROCNO 1

F2 - Acquisition Parameters  
 Date\_ 20150626  
 Time 12.16  
 INSTRUM av400  
 PROBHD 5 mm PABBO BB/  
 PULPROG zgdc.js  
 TD 5096  
 SOLVENT CD2Cl2  
 NS 1024  
 DS 0  
 SWH 51020.406 Hz  
 FIDRES 10.011854 Hz  
 AQ 0.0499408 sec  
 RG 189.85  
 DW 9.800 usec  
 DE 6.50 usec  
 TE 299.1 K  
 D1 0.00000400 sec  
 D11 0.03000000 sec  
 TD0 1

===== CHANNEL f1 =====  
 SFO1 128.3776052 MHz  
 NUC1  $^{11}\text{B}$   
 P1 10.00 usec  
 PLW1 52.00000000 W

===== CHANNEL f2 =====  
 SFO2 400.1324008 MHz  
 NUC2  $^1\text{H}$   
 CPDPRG[2] waltz16  
 PCPD2 90.00 usec  
 PLW2 13.00000000 W  
 PLW12 0.36111000 W

F2 - Processing parameters  
 SI 32768  
 SF 128.3776050 MHz  
 WDW EM  
 SSB 0  
 LB 50.00 Hz  
 GB 0  
 PC 1.40

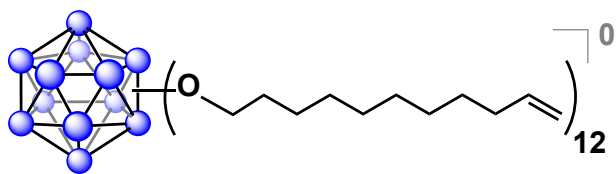

# <sup>13</sup>C NMR

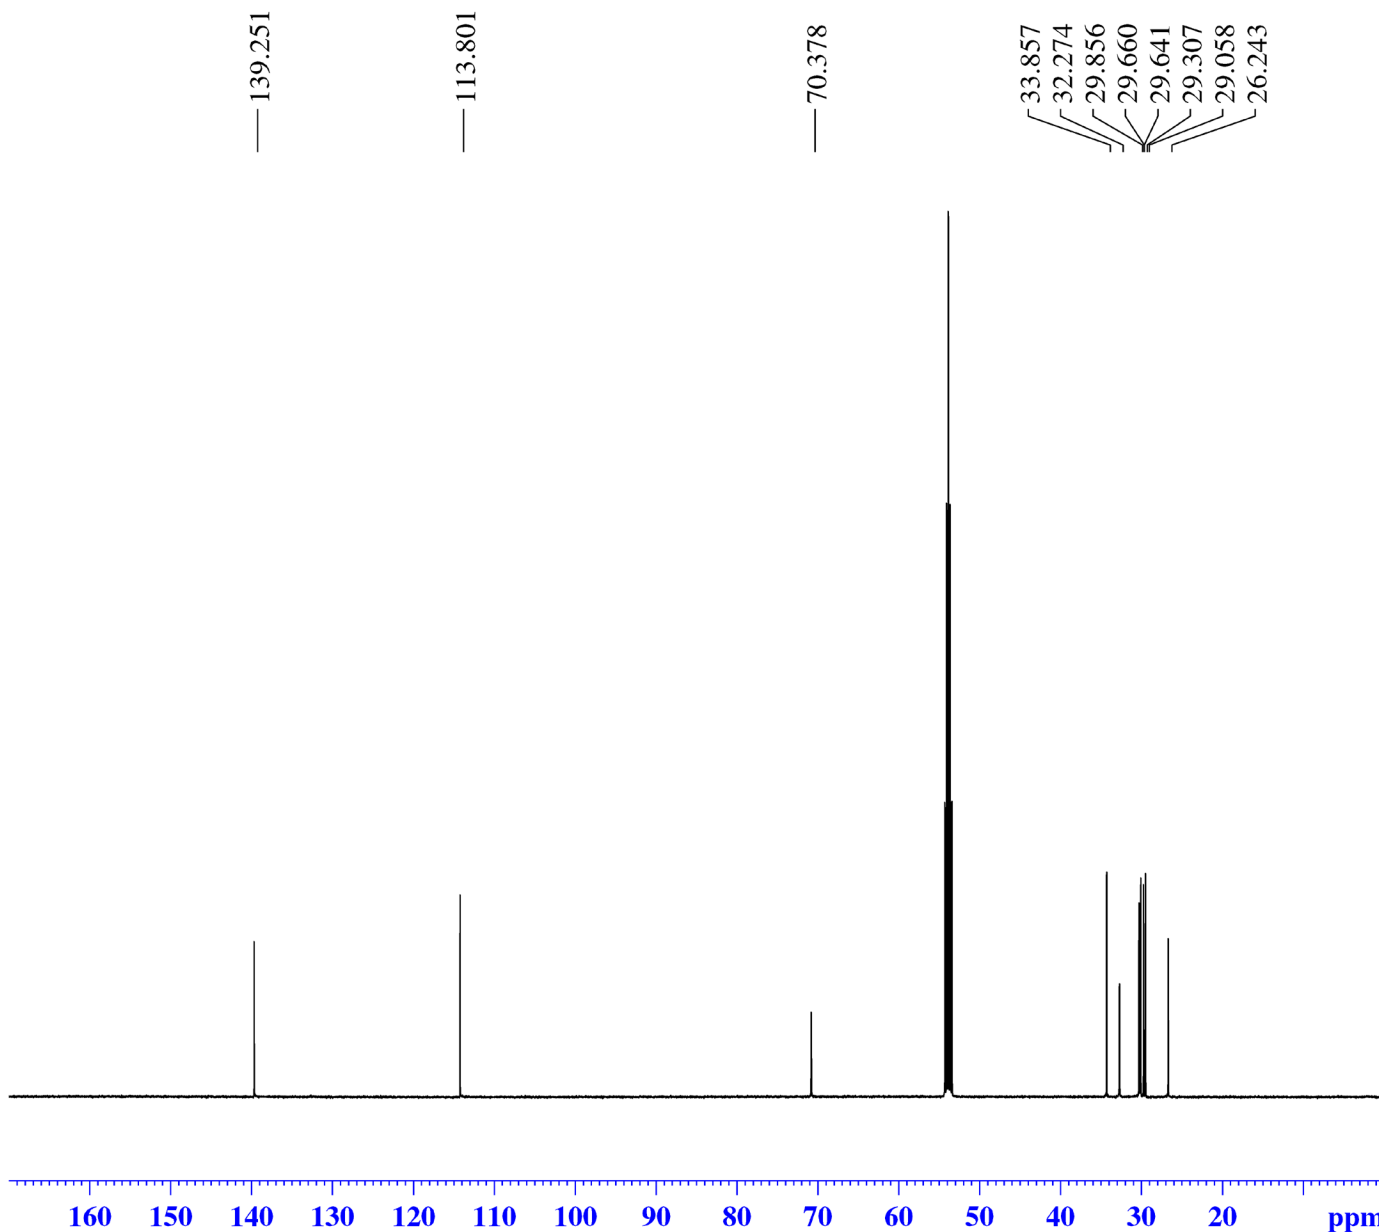

Current Data Parameters  
 NAME Jun26-2015  
 EXPNO 10  
 PROCNO 1

F2 - Acquisition Parameters  
 Date\_ 20150626  
 Time 14.05  
 INSTRUM av500  
 PROBHD 5 mm DCH 13C-1  
 PULPROG zgpg30  
 TD 65536  
 SOLVENT CD2Cl2  
 NS 64  
 DS 2  
 SWH 31250.000 Hz  
 FIDRES 0.476837 Hz  
 AQ 1.0485760 sec  
 RG 204.54  
 DW 16.000 usec  
 DE 18.00 usec  
 TE 298.0 K  
 D1 2.00000000 sec  
 D11 0.03000000 sec  
 TD0 1

===== CHANNEL f1 =====  
 SFO1 125.7722511 MHz  
 NUC1 13C  
 P1 9.63 usec  
 PLW1 23.00000000 W

===== CHANNEL f2 =====  
 SFO2 500.1330008 MHz  
 NUC2 1H  
 CPDPRG[2] waltz16  
 PCPD2 80.00 usec  
 PLW2 13.50000000 W  
 PLW12 0.21094000 W  
 PLW13 0.13500001 W

F2 - Processing parameters  
 SI 131072  
 SF 125.7577890 MHz  
 WDW EM  
 SSB 0  
 LB 1.00 Hz  
 GB 0  
 PC 1.40

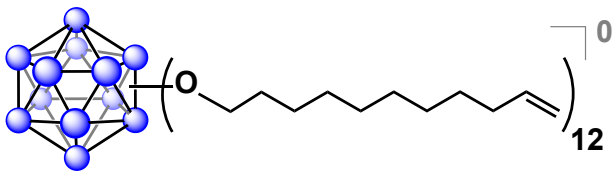

# <sup>1</sup>H NMR

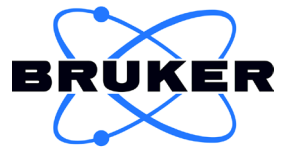

5.845  
5.819  
5.802  
5.777  
5.315  
5.312  
5.310  
5.005  
5.001  
4.996  
4.992  
4.962  
4.958  
4.953  
4.949  
4.926  
4.923  
4.920  
4.918  
4.915  
4.901  
4.898  
4.895  
4.892  
4.024  
4.008  
3.992  
2.057  
2.040  
2.023  
2.021  
2.007  
2.004  
1.556  
1.539  
1.521  
1.386  
1.368  
1.350  
1.334  
1.328  
1.280

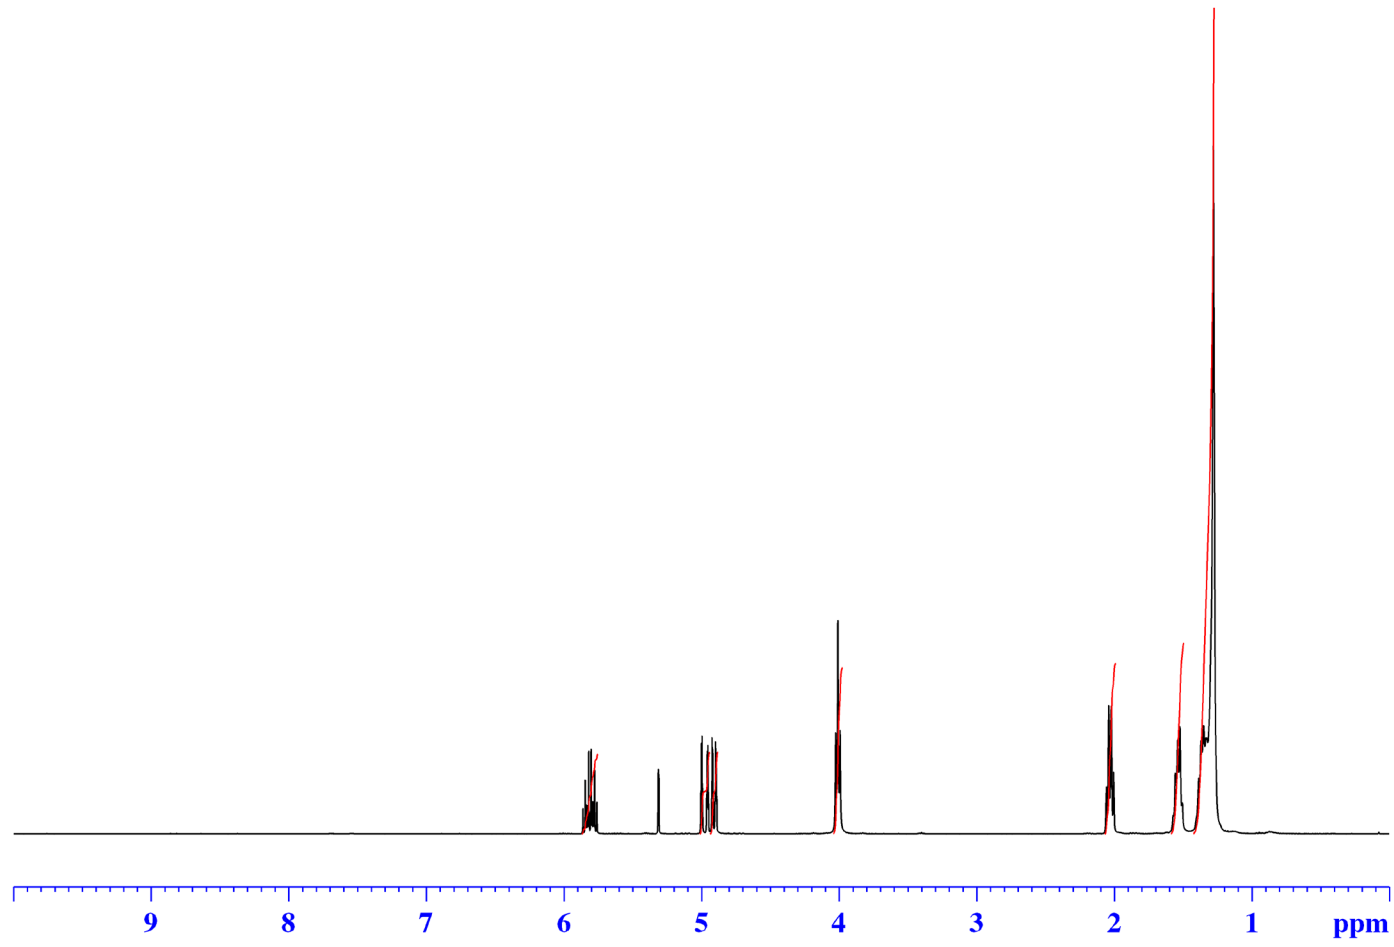

11.509  
11.771  
11.809  
24.000  
24.607  
27.564  
153.463

Current Data Parameters  
NAME B12(O-1-undecene)12  
EXPNO 21  
PROCNO 1

F2 - Acquisition Parameters  
Date\_ 20150626  
Time 12.18  
INSTRUM av400  
PROBHD 5 mm PABBO BB/  
PULPROG zg30  
TD 52882  
SOLVENT CD2Cl2  
NS 8  
DS 0  
SWH 8012.820 Hz  
FIDRES 0.151523 Hz  
AQ 3.2998369 sec  
RG 83.63  
DW 62.400 usec  
DE 6.50 usec  
TE 299.0 K  
D1 2.00000000 sec  
TD0 1

===== CHANNEL f1 =====  
SFO1 400.1324008 MHz  
NUC1 1H  
P1 15.00 usec  
PLW1 13.00000000 W

F2 - Processing parameters  
SI 65536  
SF 400.1300184 MHz  
WDW EM  
SSB 0  
LB 0.30 Hz  
GB 0  
PC 1.00

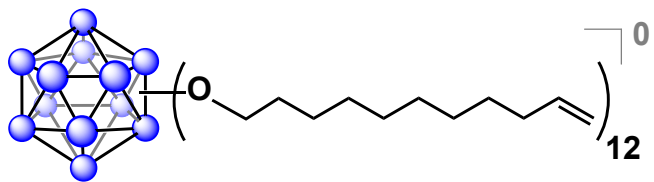

IR

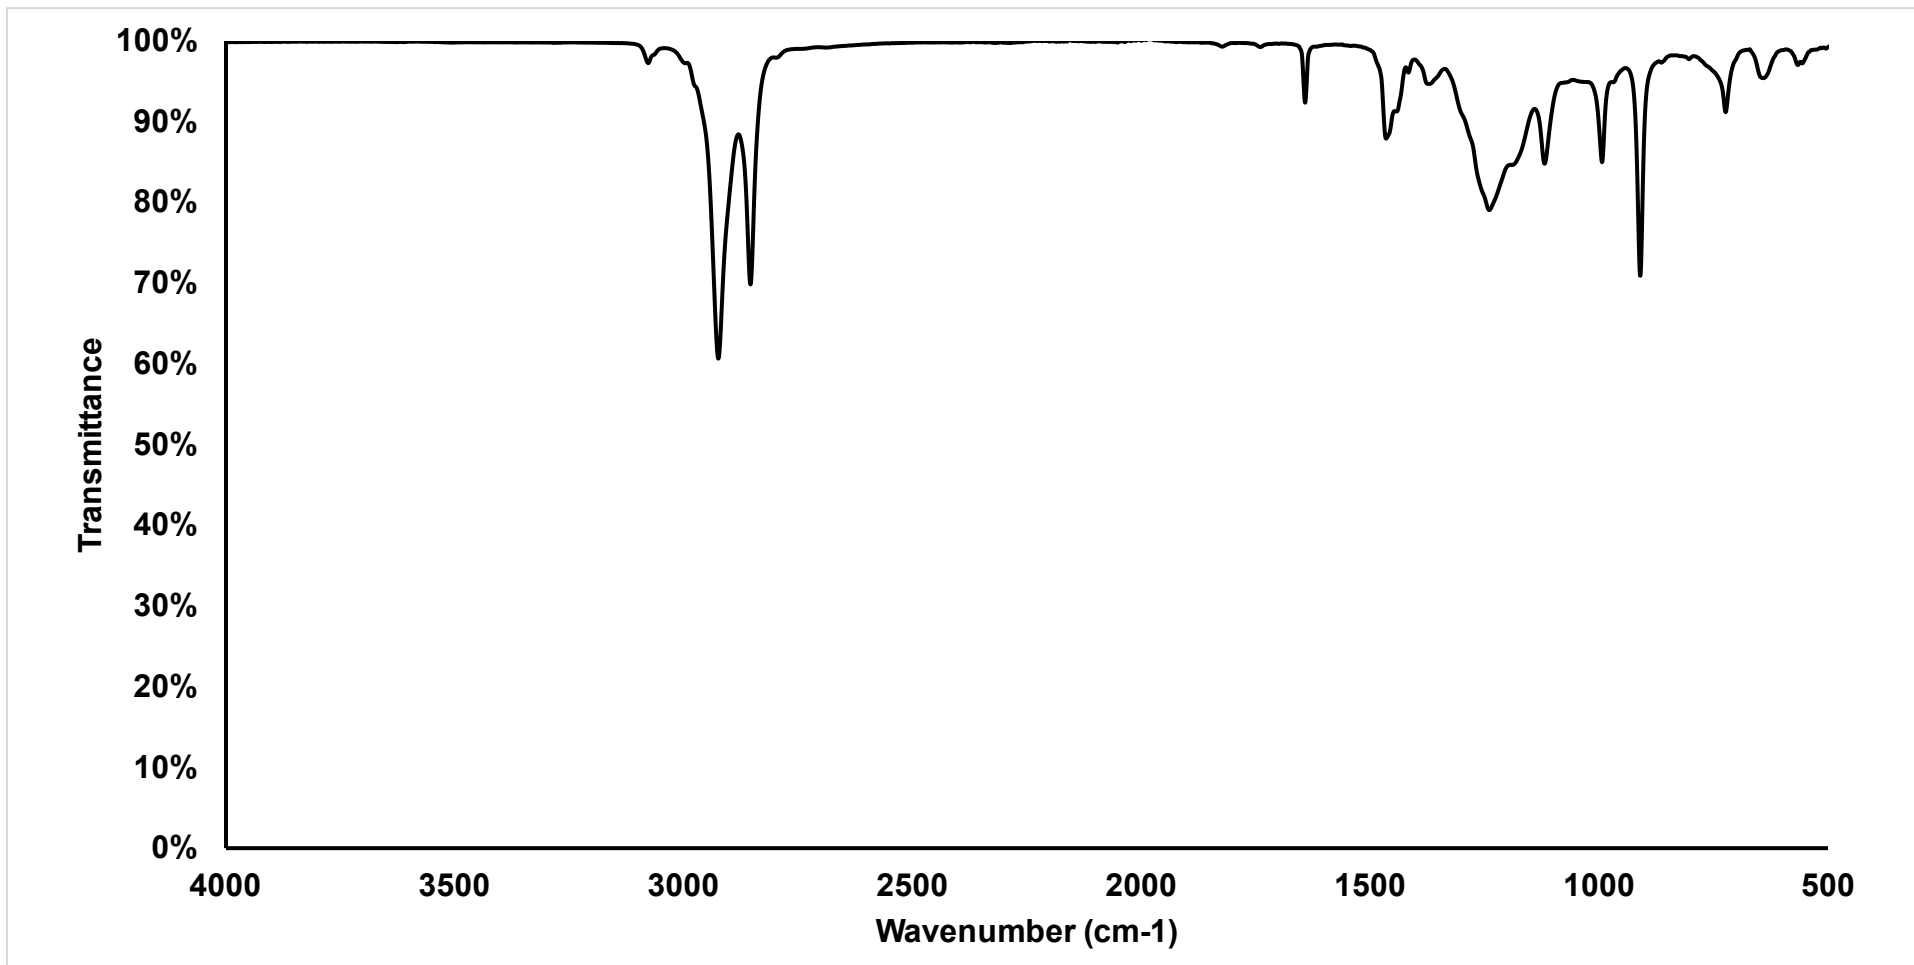

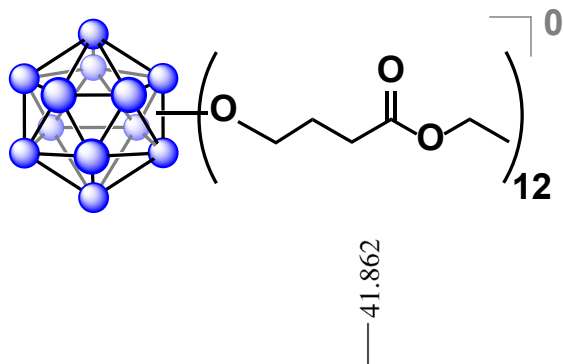

# $^{11}\text{B}$ $\{^1\text{H}\}$ NMR



Current Data Parameters  
 NAME B12(O-EtButyr)12  
 EXPNO 110  
 PROCNO 1

F2 - Acquisition Parameters  
 Date\_ 20150412  
 Time 19.19  
 INSTRUM av400  
 PROBHD 5 mm PABBO BB/  
 PULPROG zgdc.js  
 TD 5096  
 SOLVENT CDCl3  
 NS 1024  
 DS 0  
 SWH 51020.406 Hz  
 FIDRES 10.011854 Hz  
 AQ 0.0499408 sec  
 RG 189.85  
 DW 9.800 usec  
 DE 6.50 usec  
 TE 299.1 K  
 D1 0.00000400 sec  
 D11 0.03000000 sec  
 TD0 1

===== CHANNEL f1 =====  
 SFO1 128.3776052 MHz  
 NUC1  $^{11}\text{B}$   
 P1 10.00 usec  
 PLW1 52.00000000 W

===== CHANNEL f2 =====  
 SFO2 400.1324008 MHz  
 NUC2  $^1\text{H}$   
 CPDPRG[2] waltz16  
 PCPD2 90.00 usec  
 PLW2 13.00000000 W  
 PLW12 0.36111000 W

F2 - Processing parameters  
 SI 32768  
 SF 128.3776050 MHz  
 WDW EM  
 SSB 0  
 LB 50.00 Hz  
 GB 0  
 PC 1.40

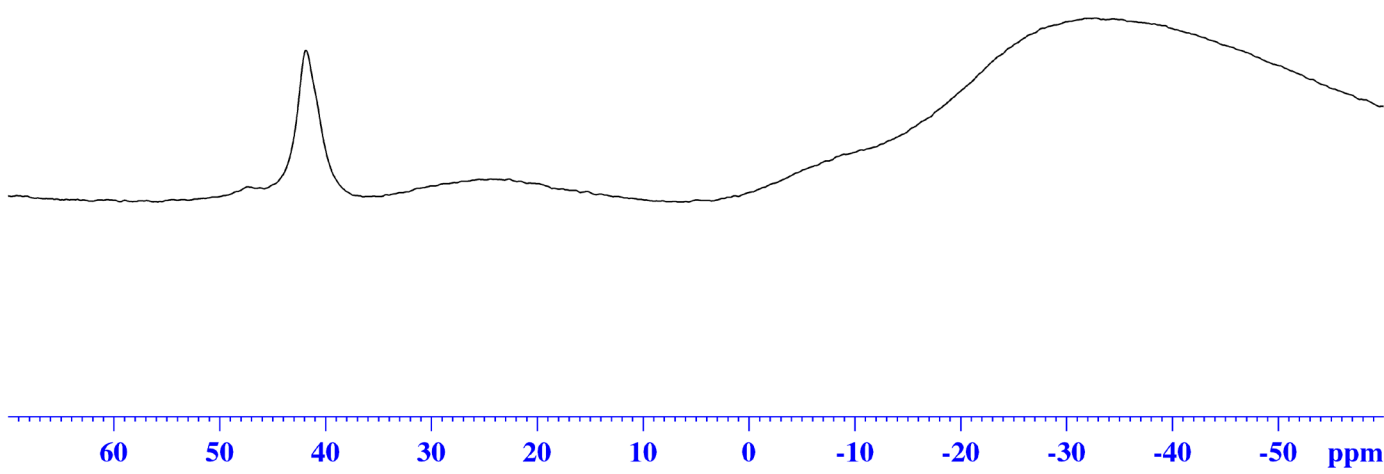

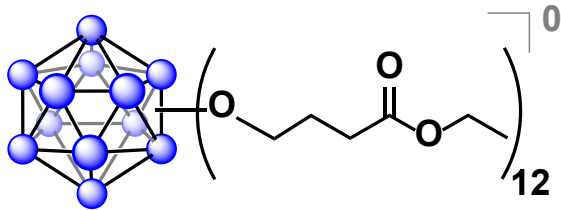

# <sup>13</sup>C NMR



— 173.319

— 69.730

— 60.264

— 30.900

— 27.383

— 14.233

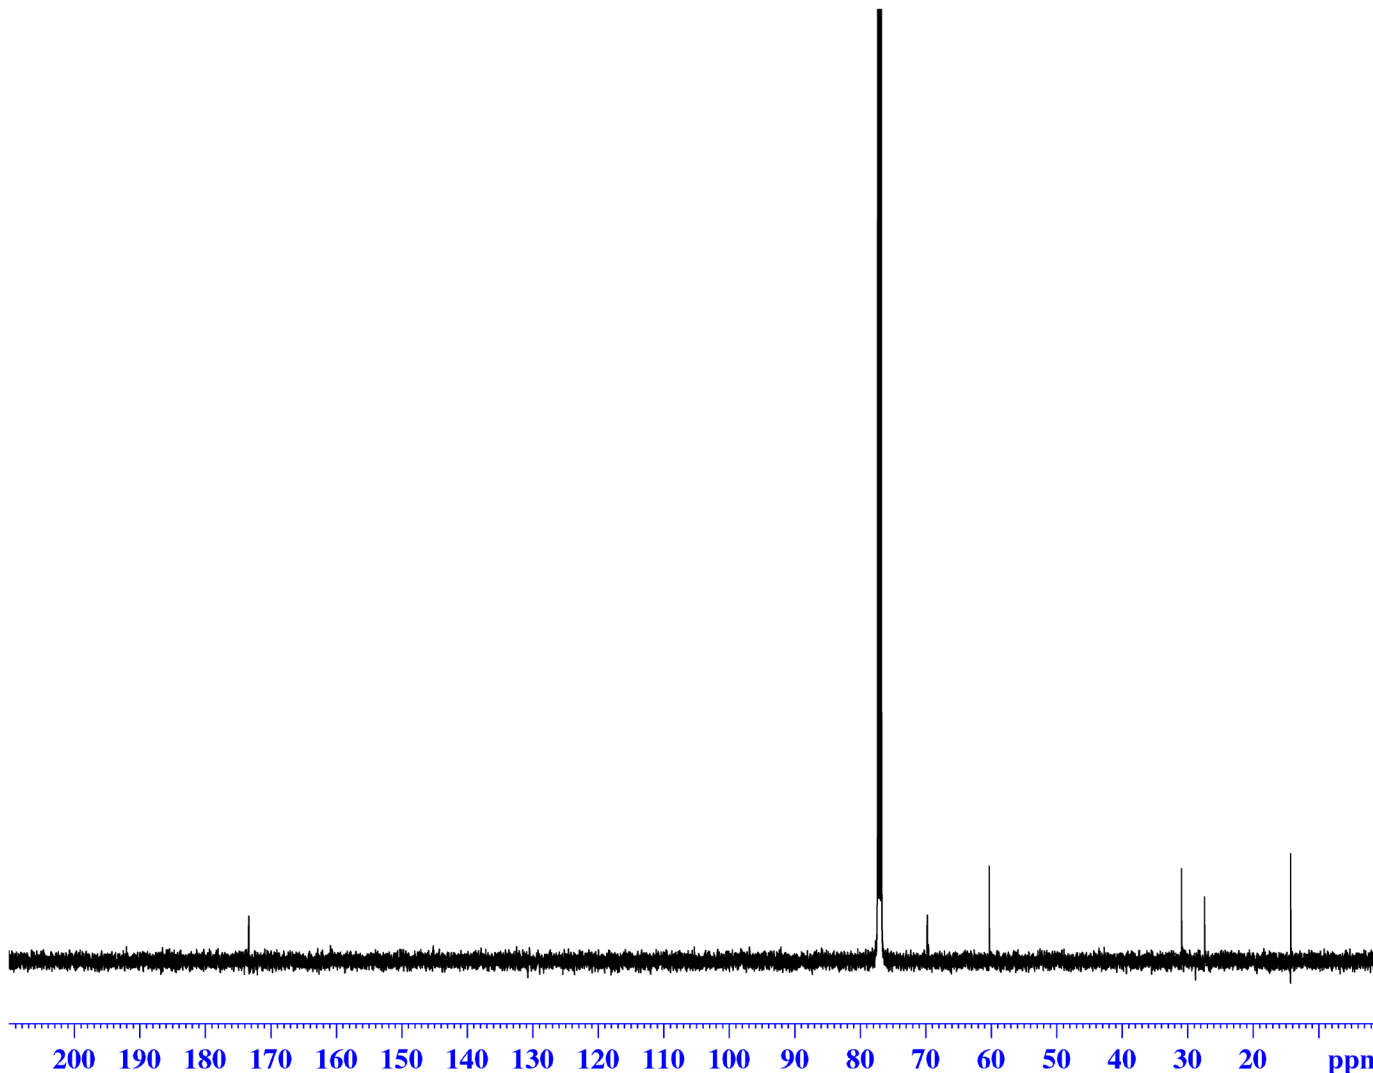

Current Data Parameters  
 NAME B12(O-EtButyr)12  
 EXPNO 60  
 PROCNO 1

F2 - Acquisition Parameters  
 Date\_ 20150406  
 Time 23.42  
 INSTRUM av500  
 PROBHD 5 mm DCH 13C-1  
 PULPROG zgpg30  
 TD 65536  
 SOLVENT CDCl3  
 NS 64  
 DS 2  
 SWH 31250.000 Hz  
 FIDRES 0.476837 Hz  
 AQ 1.0485760 sec  
 RG 204.54  
 DW 16.000 usec  
 DE 18.00 usec  
 TE 298.0 K  
 D1 2.00000000 sec  
 D11 0.03000000 sec  
 TD0 1

===== CHANNEL f1 =====  
 SFO1 125.7722511 MHz  
 NUC1 13C  
 P1 9.63 usec  
 PLW1 23.00000000 W

===== CHANNEL f2 =====  
 SFO2 500.1330008 MHz  
 NUC2 1H  
 CPDPRG[2] waltz16  
 PCPD2 80.00 usec  
 PLW2 13.50000000 W  
 PLW12 0.21094000 W  
 PLW13 0.13500001 W

F2 - Processing parameters  
 SI 131072  
 SF 125.7577890 MHz  
 WDW EM  
 SSB 0  
 LB 1.00 Hz  
 GB 0  
 PC 1.40

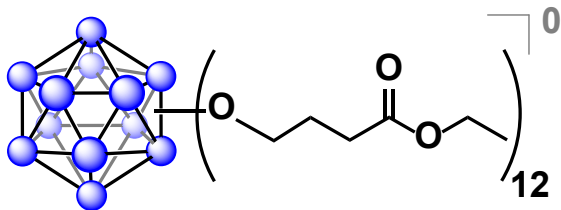

# <sup>1</sup>H NMR

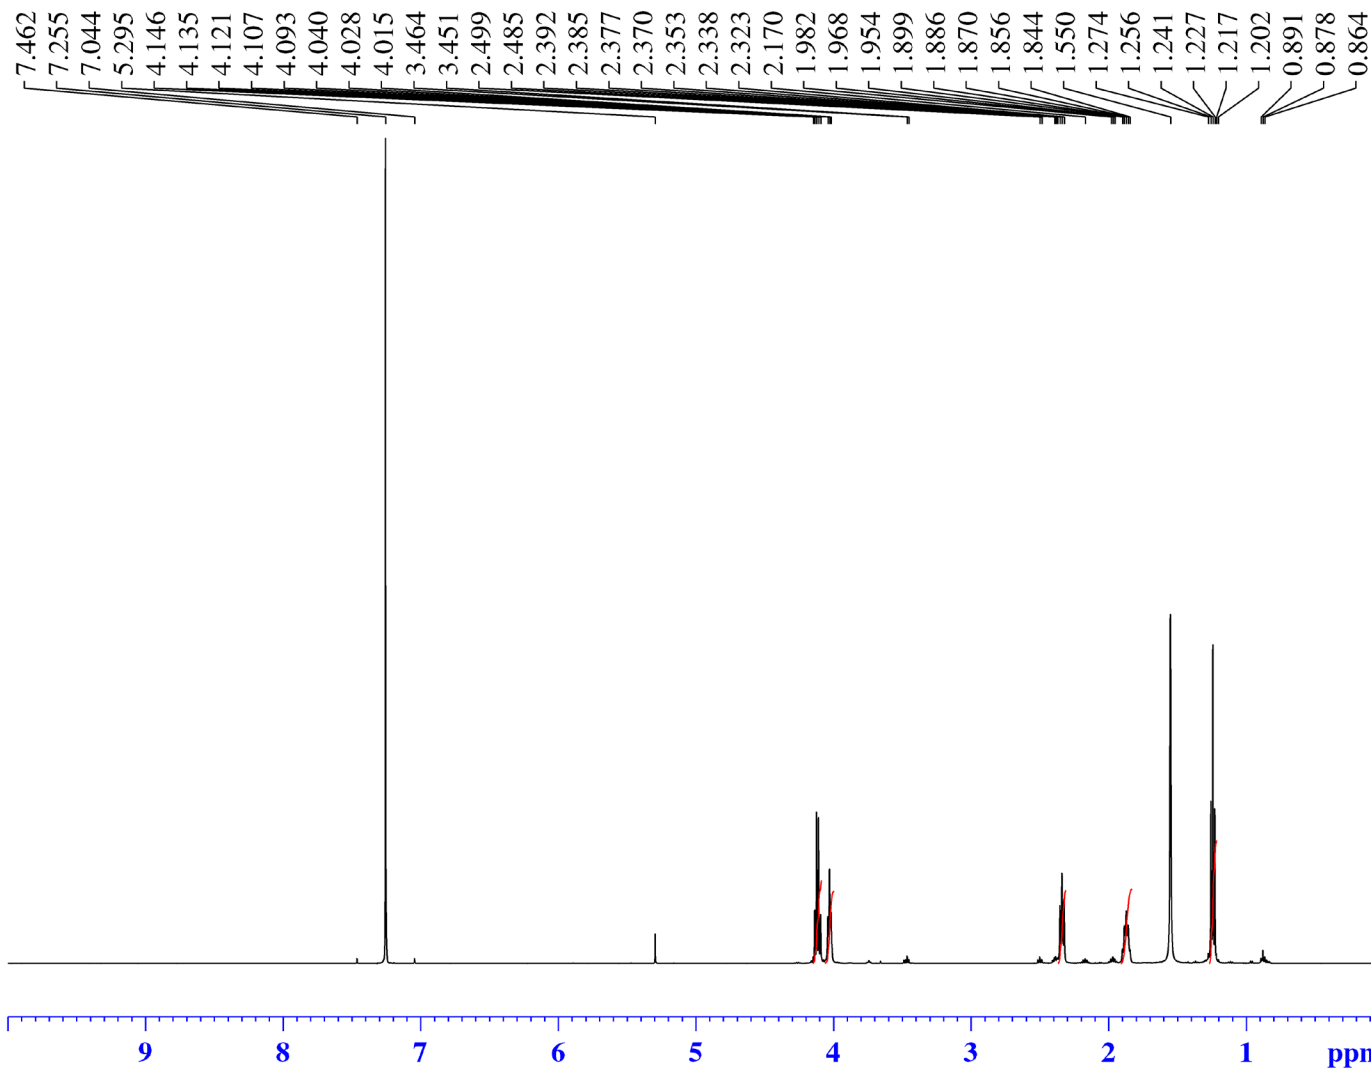

Current Data Parameters  
 NAME B12(O-EtButyr)12  
 EXPNO 61  
 PROCNO 1

F2 - Acquisition Parameters  
 Date\_ 20150406  
 Time 23.44  
 INSTRUM av500  
 PROBHD 5 mm DCH 13C-1  
 PULPROG zg30  
 TD 65536  
 SOLVENT CDCl3  
 NS 8  
 DS 0  
 SWH 10000.000 Hz  
 FIDRES 0.152588 Hz  
 AQ 3.2767999 sec  
 RG 59.34  
 DW 50.000 usec  
 DE 10.00 usec  
 TE 298.0 K  
 D1 2.00000000 sec  
 TD0 1

===== CHANNEL f1 =====  
 SFO1 500.1330008 MHz  
 NUC1 1H  
 P1 10.00 usec  
 PLW1 13.50000000 W

F2 - Processing parameters  
 SI 65536  
 SF 500.1300146 MHz  
 WDW EM  
 SSB 0  
 LB 0.30 Hz  
 GB 0  
 PC 1.00



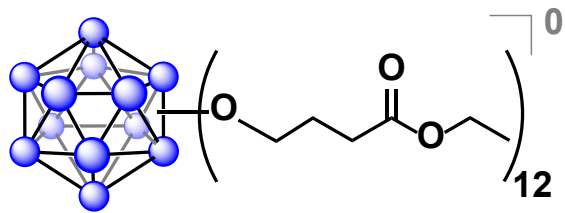

## Q Exactive High-Res Mass Spec

EtBut #1 RT: 0.01 AV: 1 NL: 2.50E7  
T: FTMS - p ESI Full ms [800.00-2000.00]

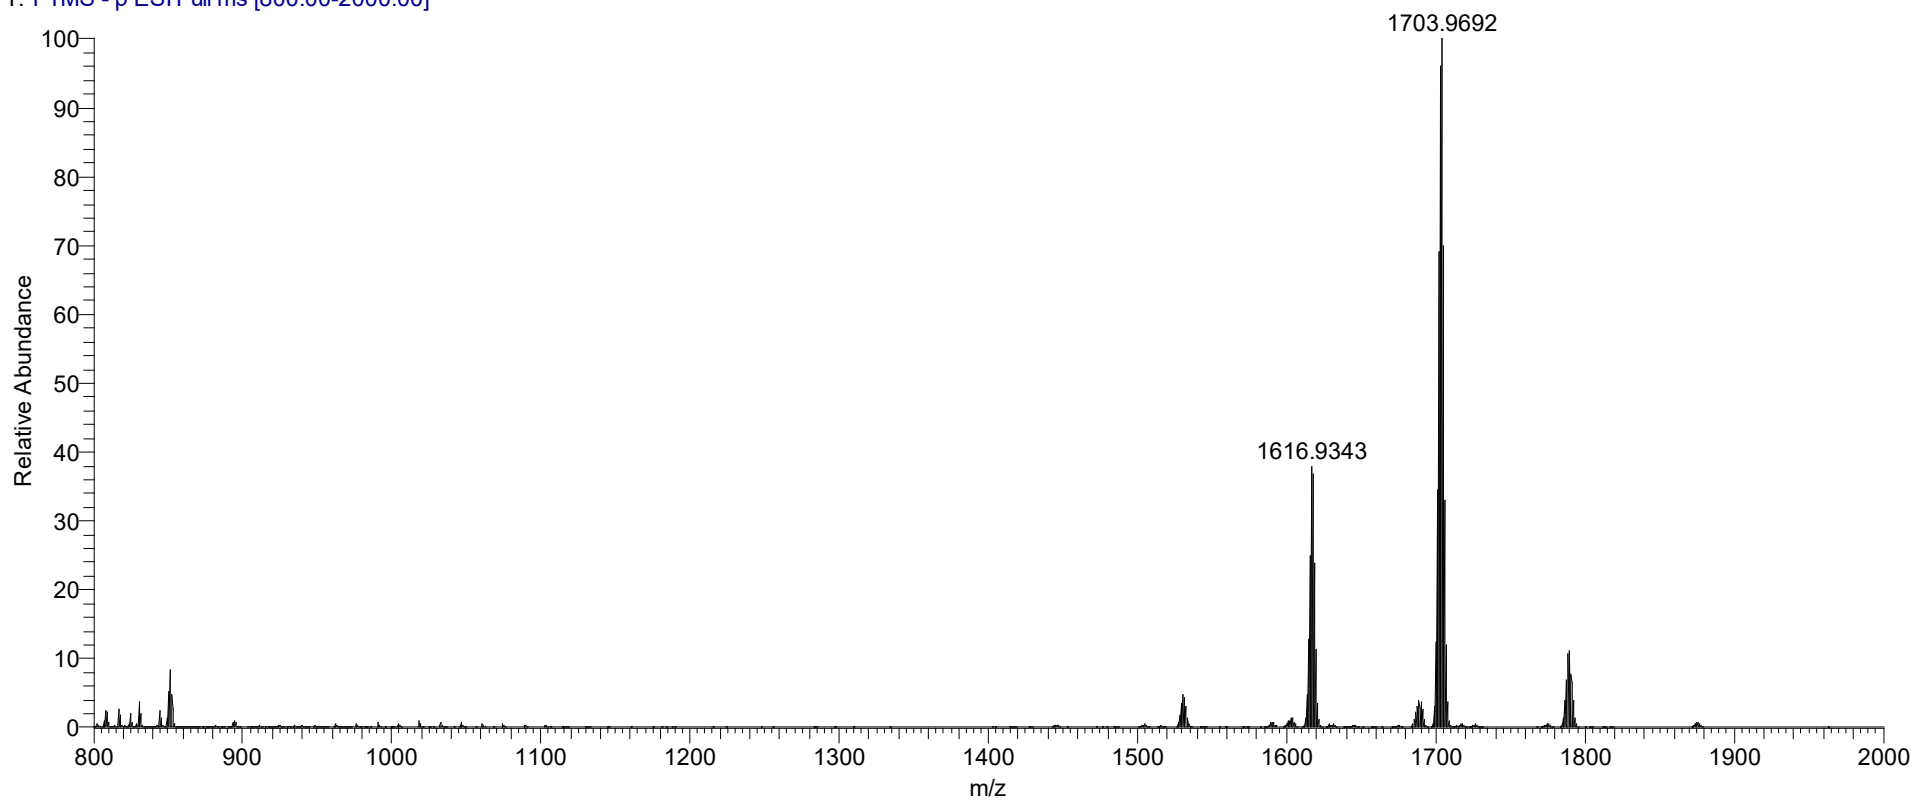

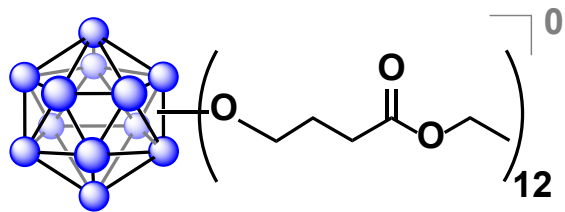

# Q Exactive High-Res Mass Spec

EtBut #1 RT: 0.01 AV: 1 NL: 2.50E7  
T: FTMS - p ESI Full ms [800.00-2000.00]

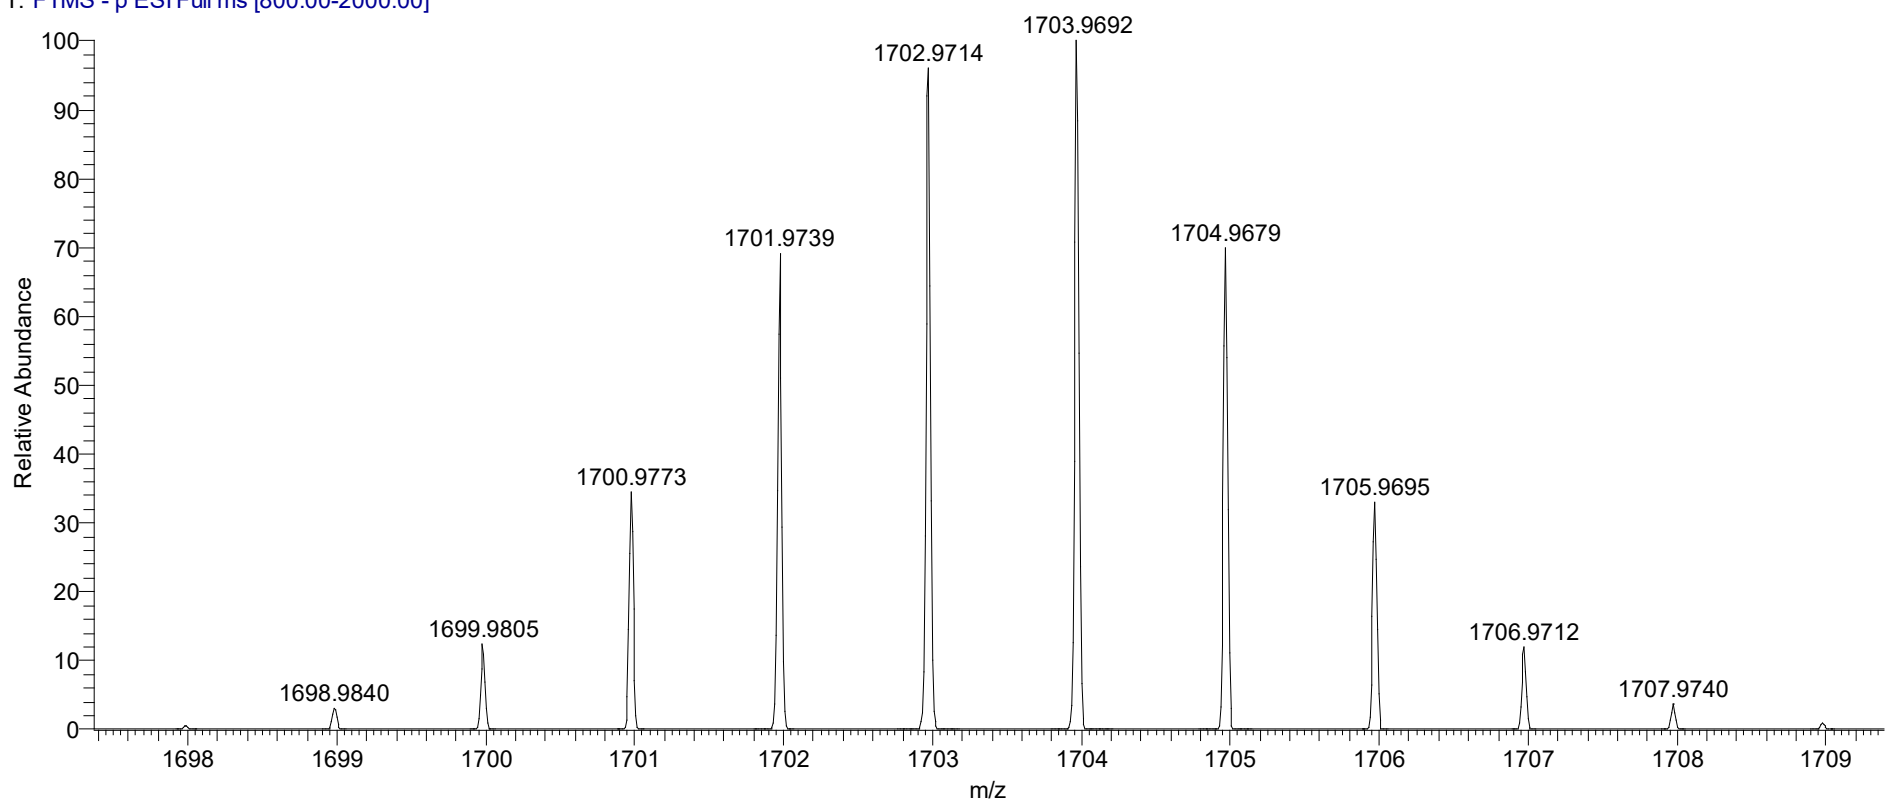

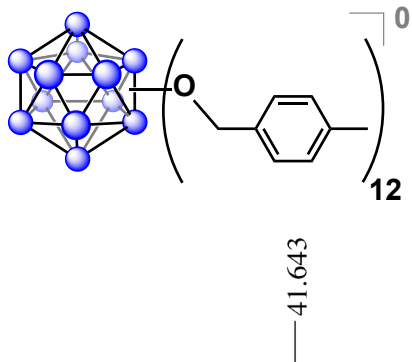

# $^{11}\text{B}$ $\{^1\text{H}\}$ NMR



Current Data Parameters  
 NAME Aug29-2015  
 EXPNO 160  
 PROCNO 1

F2 - Acquisition Parameters  
 Date\_ 20150829  
 Time 21.02  
 INSTRUM av400  
 PROBHD 5 mm PABBO BB/  
 PULPROG zgdc.js  
 TD 5096  
 SOLVENT CDCl3  
 NS 1024  
 DS 0  
 SWH 51020.406 Hz  
 FIDRES 10.011854 Hz  
 AQ 0.0499408 sec  
 RG 189.85  
 DW 9.800 usec  
 DE 6.50 usec  
 TE 299.3 K  
 D1 0.00000400 sec  
 D11 0.03000000 sec  
 TD0 1

===== CHANNEL f1 =====  
 SFO1 128.3776052 MHz  
 NUC1  $^{11}\text{B}$   
 P1 10.00 usec  
 PLW1 52.00000000 W

===== CHANNEL f2 =====  
 SFO2 400.1324008 MHz  
 NUC2  $^1\text{H}$   
 CPDPRG[2] waltz16  
 PCPD2 90.00 usec  
 PLW2 13.00000000 W  
 PLW12 0.36111000 W

F2 - Processing parameters  
 SI 32768  
 SF 128.3776050 MHz  
 WDW EM  
 SSB 0  
 LB 50.00 Hz  
 GB 0  
 PC 1.40

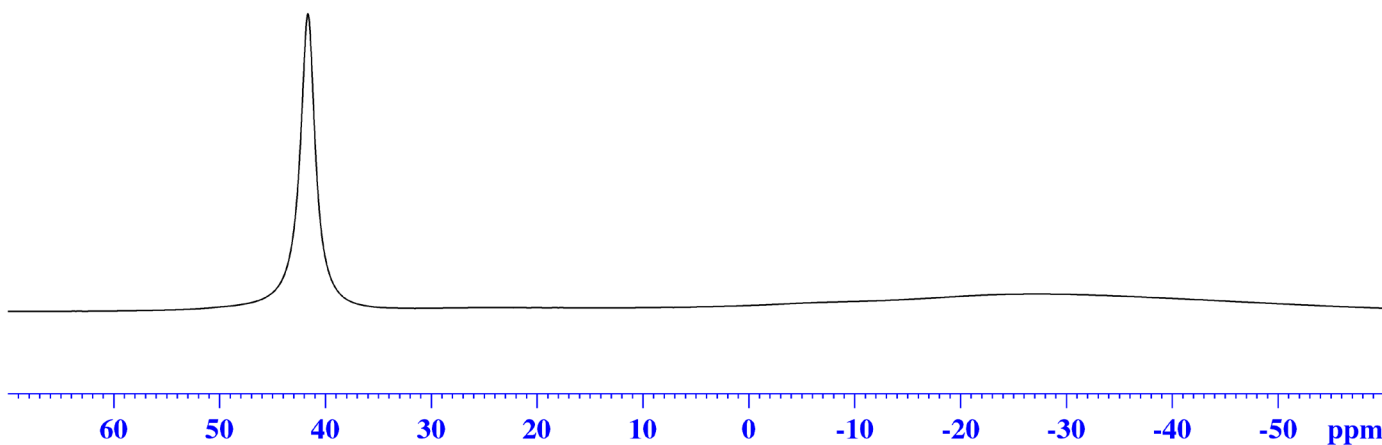

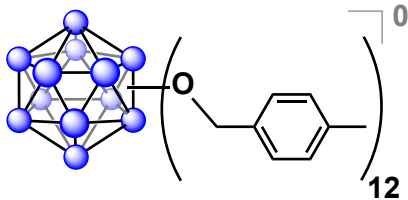

# <sup>13</sup>C NMR

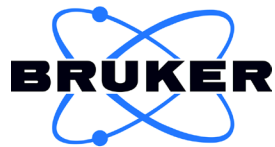

137.858  
136.379  
128.688  
127.265

72.807

21.164

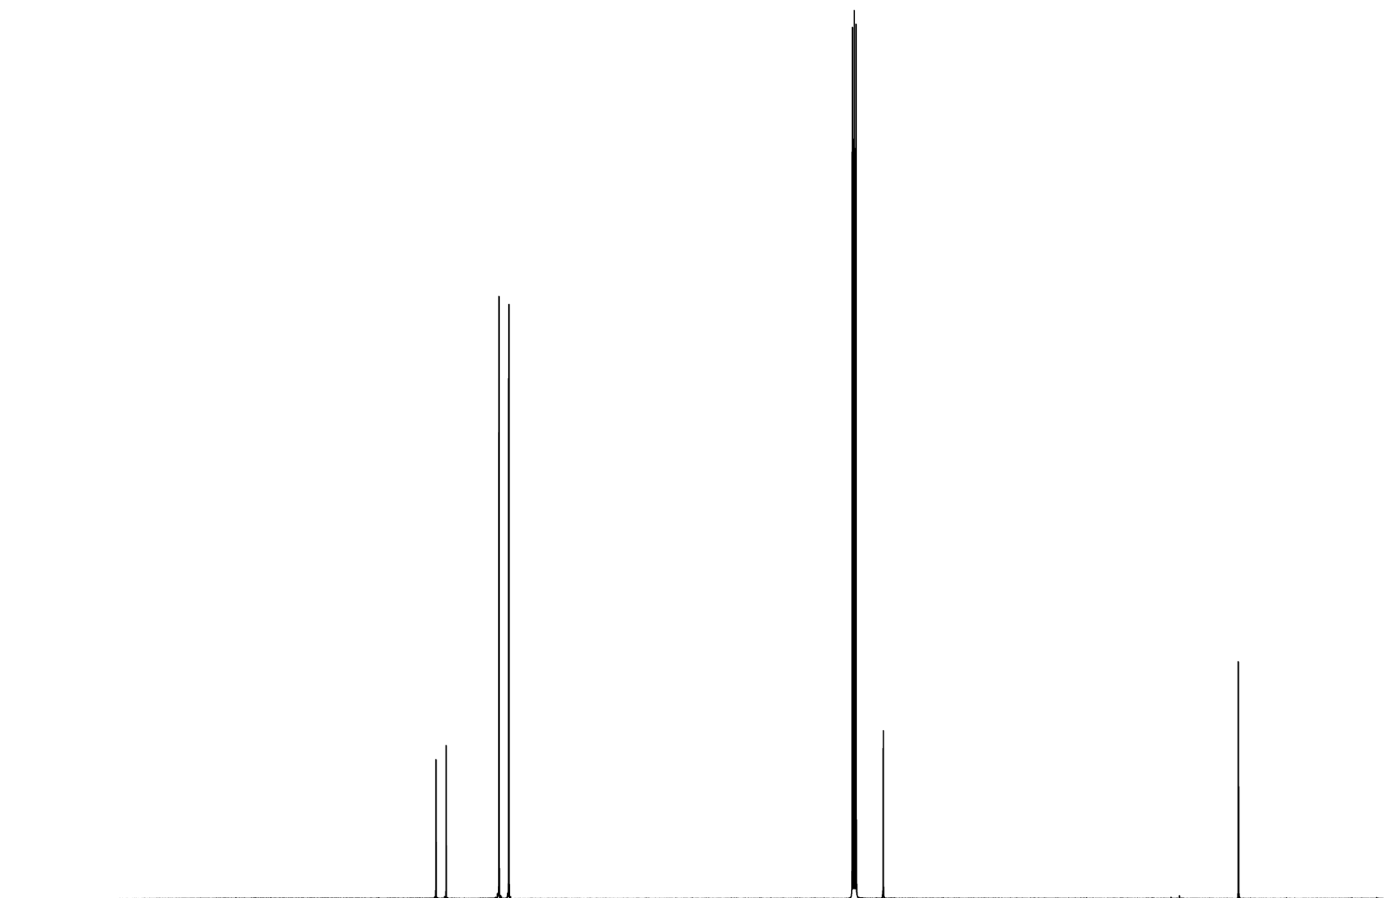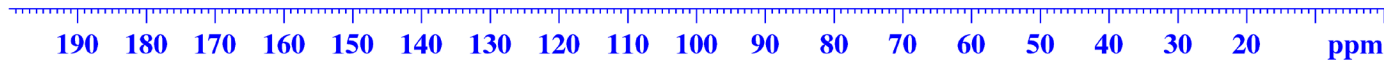

Current Data Parameters  
NAME B12(O-4-MeBn)12  
EXPNO 60  
PROCNO 1

F2 - Acquisition Parameters  
Date\_ 20150829  
Time 22.04  
INSTRUM av500  
PROBHD 5 mm DCH 13C-1  
PULPROG zgpg30  
TD 65536  
SOLVENT CDCl3  
NS 256  
DS 2  
SWH 31250.000 Hz  
FIDRES 0.476837 Hz  
AQ 1.0485760 sec  
RG 204.54  
DW 16.000 usec  
DE 18.00 usec  
TE 298.0 K  
D1 2.00000000 sec  
D11 0.03000000 sec  
TD0 1

==== CHANNEL f1 =====  
SFO1 125.7722511 MHz  
NUC1 13C  
P1 9.63 usec  
PLW1 23.00000000 W

==== CHANNEL f2 =====  
SFO2 500.1330008 MHz  
NUC2 1H  
CPDPRG[2] waltz16  
PCPD2 80.00 usec  
PLW2 13.50000000 W  
PLW12 0.21094000 W  
PLW13 0.13500001 W

F2 - Processing parameters  
SI 131072  
SF 125.7577890 MHz  
WDW EM  
SSB 0  
LB 1.00 Hz  
GB 0  
PC 1.40

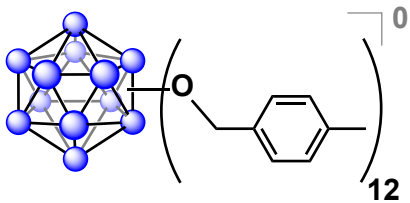

# <sup>1</sup>H NMR



7.002  
6.981  
6.975  
6.954

5.167

2.310

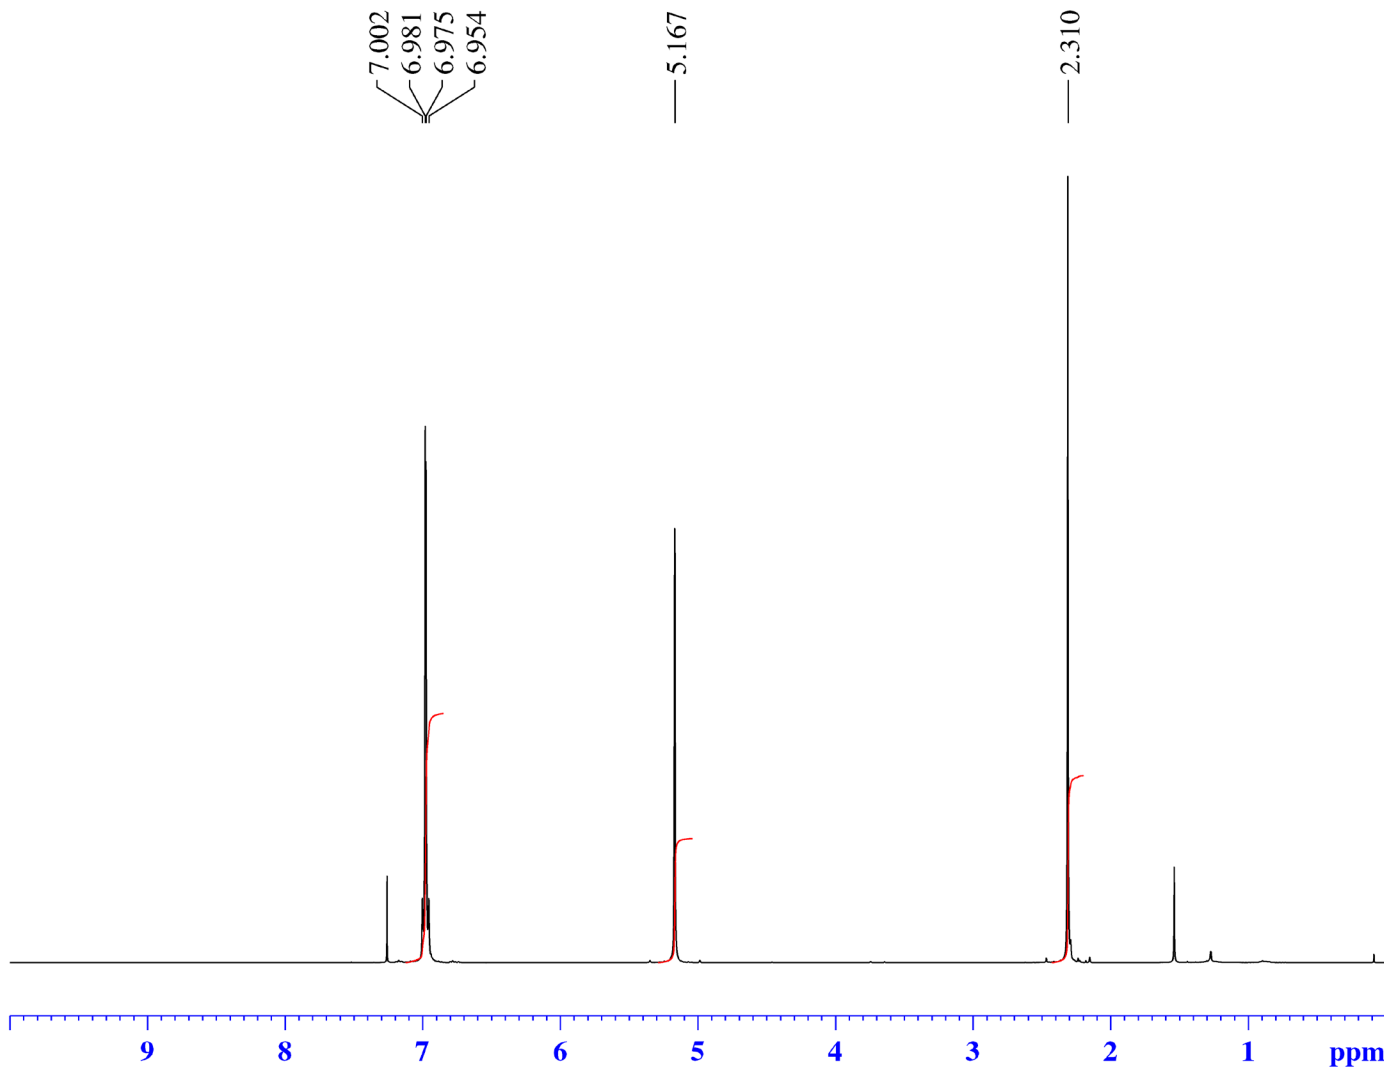

48.123

24.000

36.142

Current Data Parameters  
 NAME B12(O-4-MeBn)12  
 EXPNO 161  
 PROCNO 1

F2 - Acquisition Parameters  
 Date\_ 20150829  
 Time 21.05  
 INSTRUM av400  
 PROBHD 5 mm PABBO BB/  
 PULPROG zg30  
 TD 52882  
 SOLVENT CDCl3  
 NS 32  
 DS 0  
 SWH 8012.820 Hz  
 FIDRES 0.151523 Hz  
 AQ 3.2998369 sec  
 RG 155.85  
 DW 62.400 usec  
 DE 6.50 usec  
 TE 299.0 K  
 D1 2.00000000 sec  
 TD0 1

===== CHANNEL f1 =====  
 SFO1 400.1324008 MHz  
 NUC1 1H  
 P1 15.00 usec  
 PLW1 13.00000000 W

F2 - Processing parameters  
 SI 65536  
 SF 400.1300184 MHz  
 WDW EM  
 SSB 0  
 LB 0.30 Hz  
 GB 0  
 PC 1.00

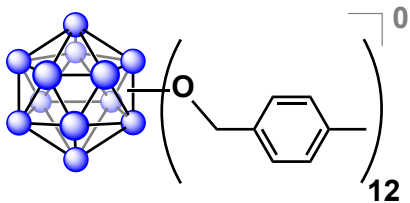

# Q Exactive High-Res Mass Spec

4MeBn\_2 #1 RT: 0.01 AV: 1 NL: 5.81E4  
T: FTMS - p ESI Full ms [1000.00-2200.00]

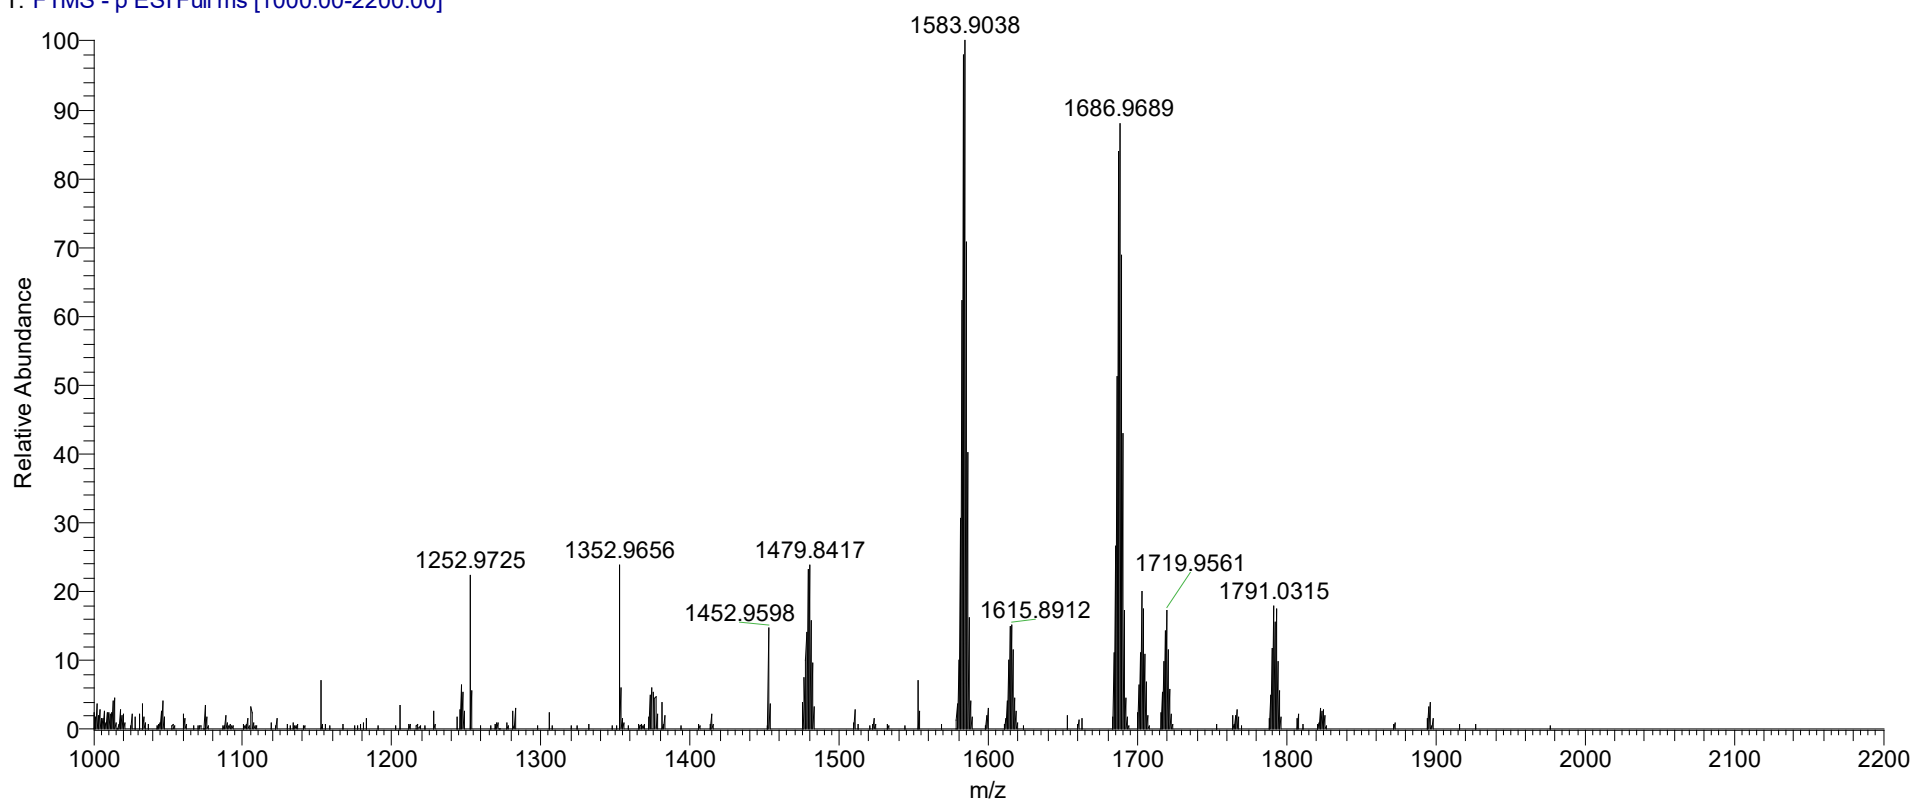



# Q Exactive High-Res Mass Spec

4MeBn\_2 #1 RT: 0.01 AV: 1 NL: 5.81E4  
T: FTMS - p ESI Full ms [1000.00-2200.00]

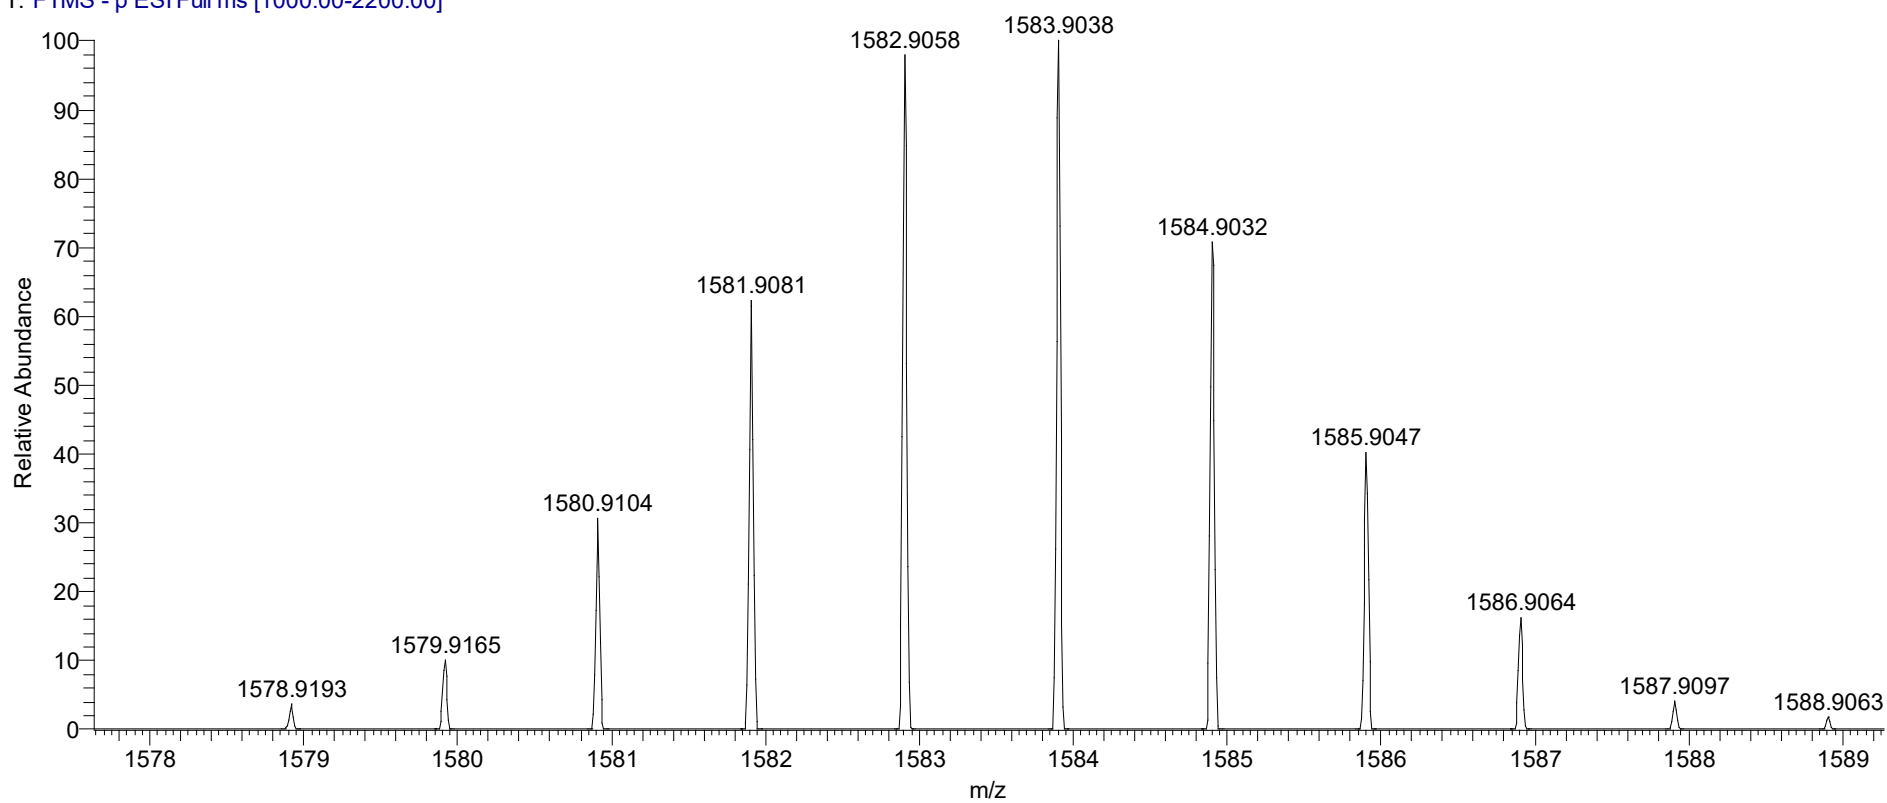

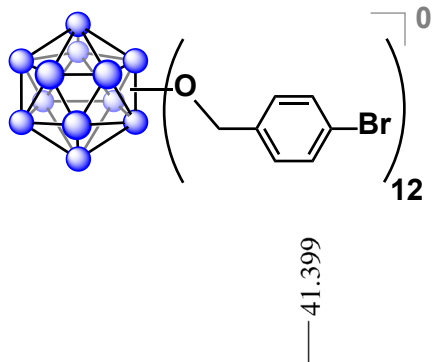

# $^{11}\text{B}$ $\{^1\text{H}\}$ NMR



Current Data Parameters  
 NAME B12(O-4-BrBn)12  
 EXPNO 10  
 PROCNO 1

F2 - Acquisition Parameters  
 Date\_ 20150624  
 Time 10.50  
 INSTRUM av400  
 PROBHD 5 mm PABBO BB/  
 PULPROG zgdc.js  
 TD 5096  
 SOLVENT CDCl3  
 NS 1024  
 DS 0  
 SWH 51020.406 Hz  
 FIDRES 10.011854 Hz  
 AQ 0.0499408 sec  
 RG 189.85  
 DW 9.800 usec  
 DE 6.50 usec  
 TE 299.1 K  
 D1 0.00000400 sec  
 D11 0.03000000 sec  
 TD0 1

===== CHANNEL f1 =====  
 SFO1 128.3776052 MHz  
 NUC1  $^{11}\text{B}$   
 P1 10.00 usec  
 PLW1 52.00000000 W

===== CHANNEL f2 =====  
 SFO2 400.1324008 MHz  
 NUC2  $^1\text{H}$   
 CPDPRG[2] waltz16  
 PCPD2 90.00 usec  
 PLW2 13.00000000 W  
 PLW12 0.36111000 W

F2 - Processing parameters  
 SI 32768  
 SF 128.3776050 MHz  
 WDW EM  
 SSB 0  
 LB 50.00 Hz  
 GB 0  
 PC 1.40

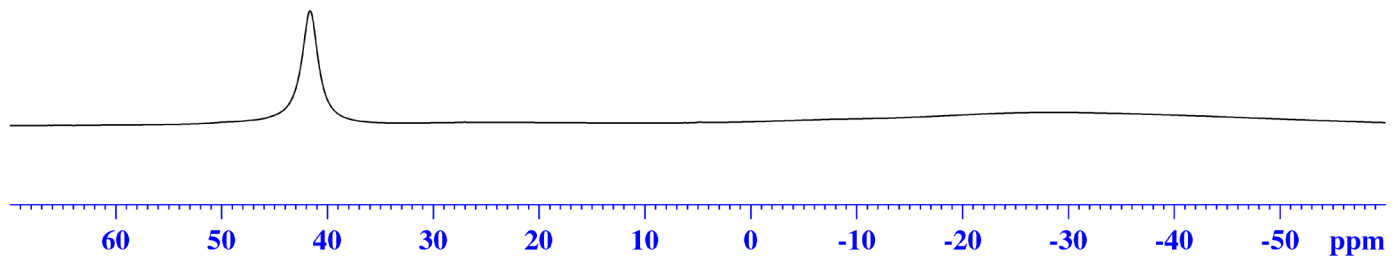



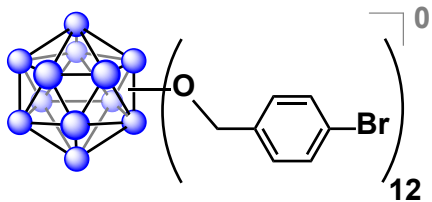

# <sup>13</sup>C NMR

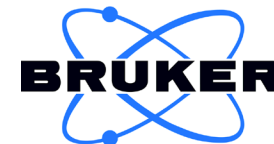

— 138.500  
 — 131.587  
 — 128.451  
 — 121.628

— 72.561

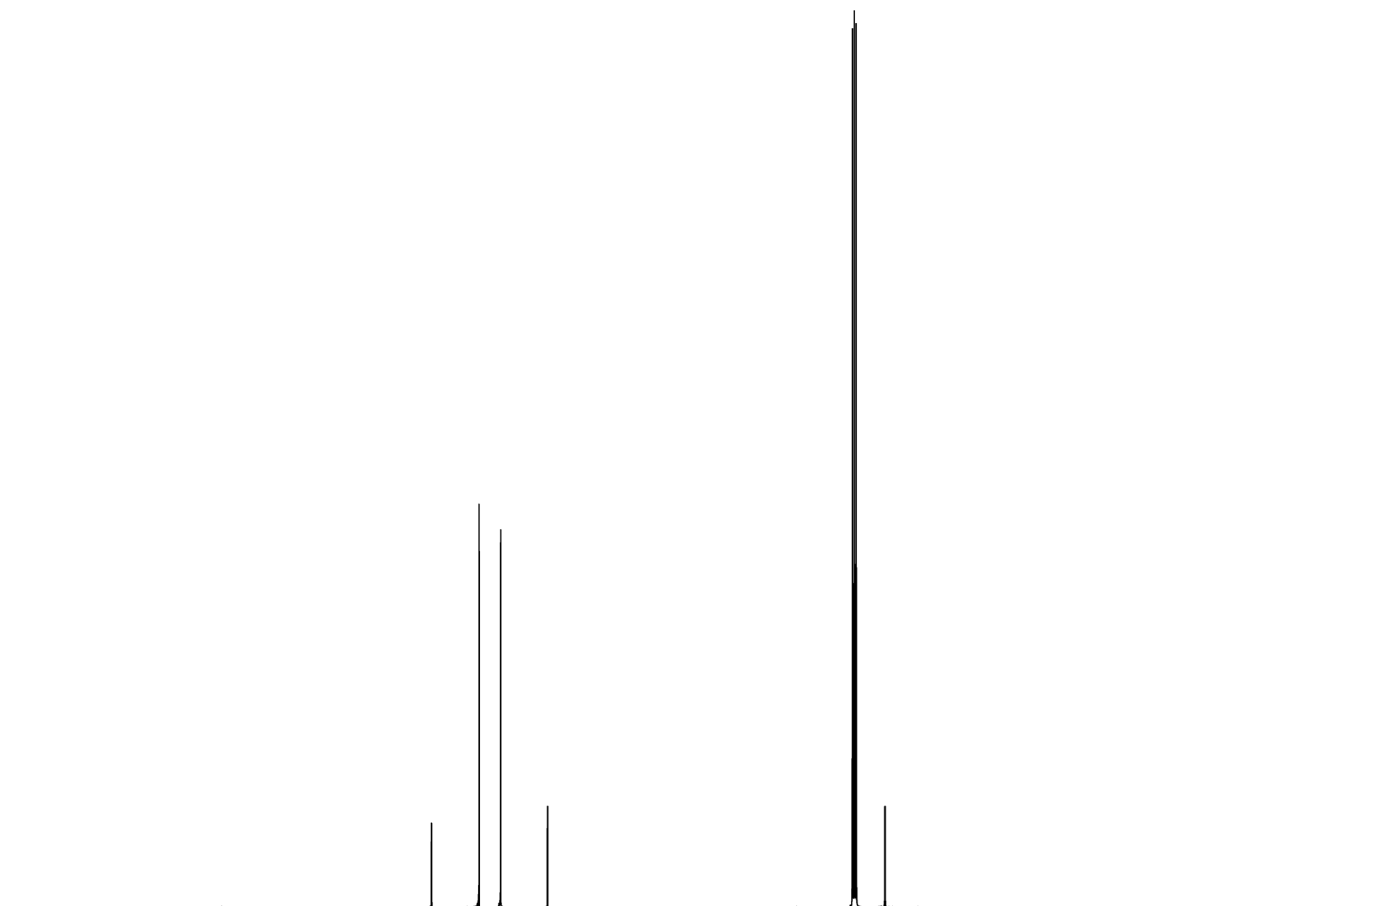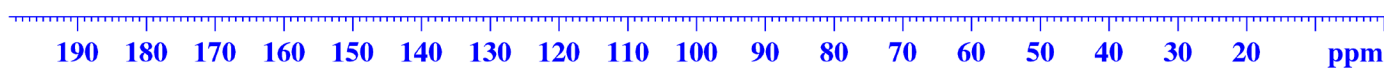

Current Data Parameters  
 NAME Jan13-2016-awixtrom  
 EXPNO 10  
 PROCNO 1

F2 - Acquisition Parameters  
 Date\_ 20160113  
 Time 15.37  
 INSTRUM av500  
 PROBHD 5 mm DCH 13C-1  
 PULPROG zgpg30  
 TD 65536  
 SOLVENT CDCl3  
 NS 256  
 DS 2  
 SWH 31250.000 Hz  
 FIDRES 0.476837 Hz  
 AQ 1.0485760 sec  
 RG 204.54  
 DW 16.000 usec  
 DE 18.00 usec  
 TE 298.0 K  
 D1 2.00000000 sec  
 D11 0.03000000 sec  
 TD0 1

===== CHANNEL f1 =====  
 SFO1 125.7722511 MHz  
 NUC1 13C  
 P1 9.63 usec  
 PLW1 23.00000000 W

===== CHANNEL f2 =====  
 SFO2 500.1330008 MHz  
 NUC2 1H  
 CPDPRG[2] waltz16  
 PCPD2 80.00 usec  
 PLW2 13.50000000 W  
 PLW12 0.21094000 W  
 PLW13 0.13500001 W

F2 - Processing parameters  
 SI 131072  
 SF 125.7577890 MHz  
 WDW EM  
 SSB 0  
 LB 1.00 Hz  
 GB 0  
 PC 1.40

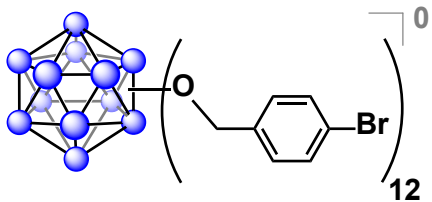

# <sup>1</sup>H NMR



7.329  
7.313  
6.859  
6.842

5.061

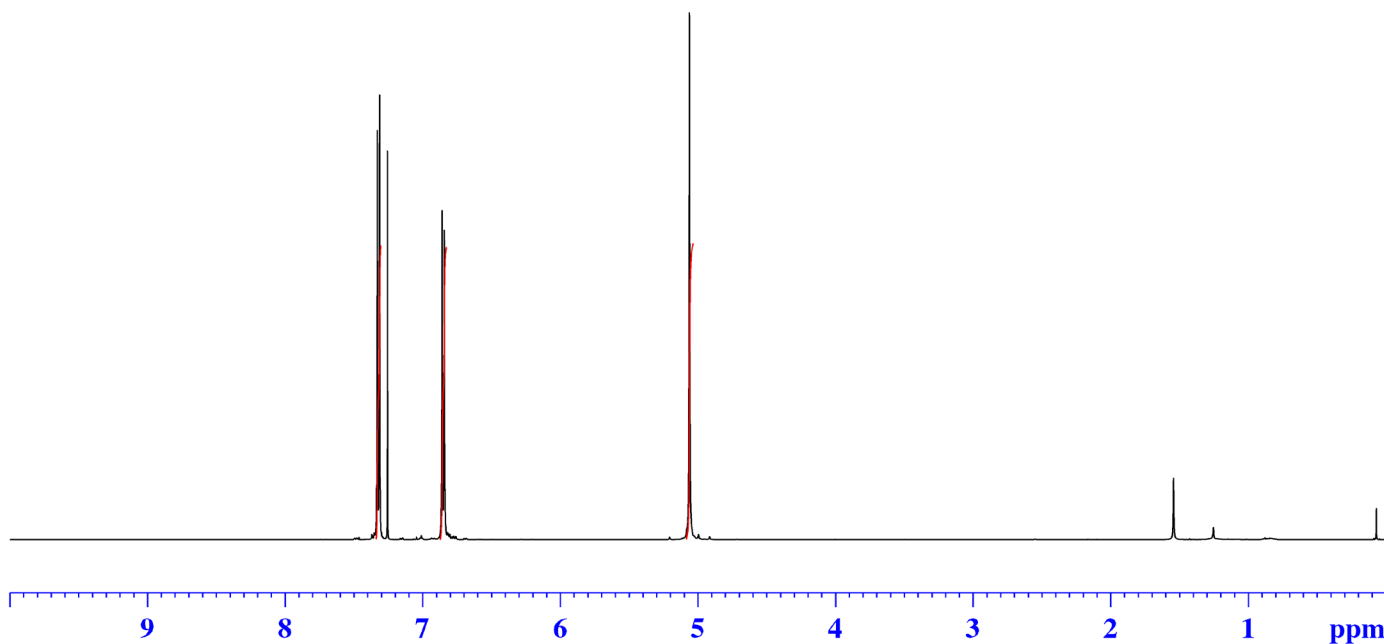

Current Data Parameters  
 NAME Jan13-2016-awixtrom  
 EXPNO 11  
 PROCNO 1

F2 - Acquisition Parameters  
 Date\_ 20160113  
 Time 15.40  
 INSTRUM av500  
 PROBHD 5 mm DCH 13C-1  
 PULPROG zg30  
 TD 65536  
 SOLVENT CDCl3  
 NS 16  
 DS 0  
 SWH 10000.000 Hz  
 FIDRES 0.152588 Hz  
 AQ 3.2767999 sec  
 RG 52.41  
 DW 50.000 usec  
 DE 10.00 usec  
 TE 298.0 K  
 D1 2.00000000 sec  
 TD0 1

===== CHANNEL f1 =====  
 SFO1 500.1330008 MHz  
 NUC1 1H  
 P1 10.00 usec  
 PLW1 13.50000000 W

F2 - Processing parameters  
 SI 65536  
 SF 500.1300146 MHz  
 WDW EM  
 SSB 0  
 LB 0.30 Hz  
 GB 0  
 PC 1.00

23.836

23.725

24.000

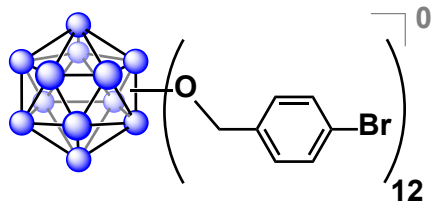

# Q Exactive High-Res Mass Spec

4-BrBn#1 RT: 0.01 AV: 1 NL: 5.40E5  
T: FTMS - p ESI Full ms [1000.00-2800.00]

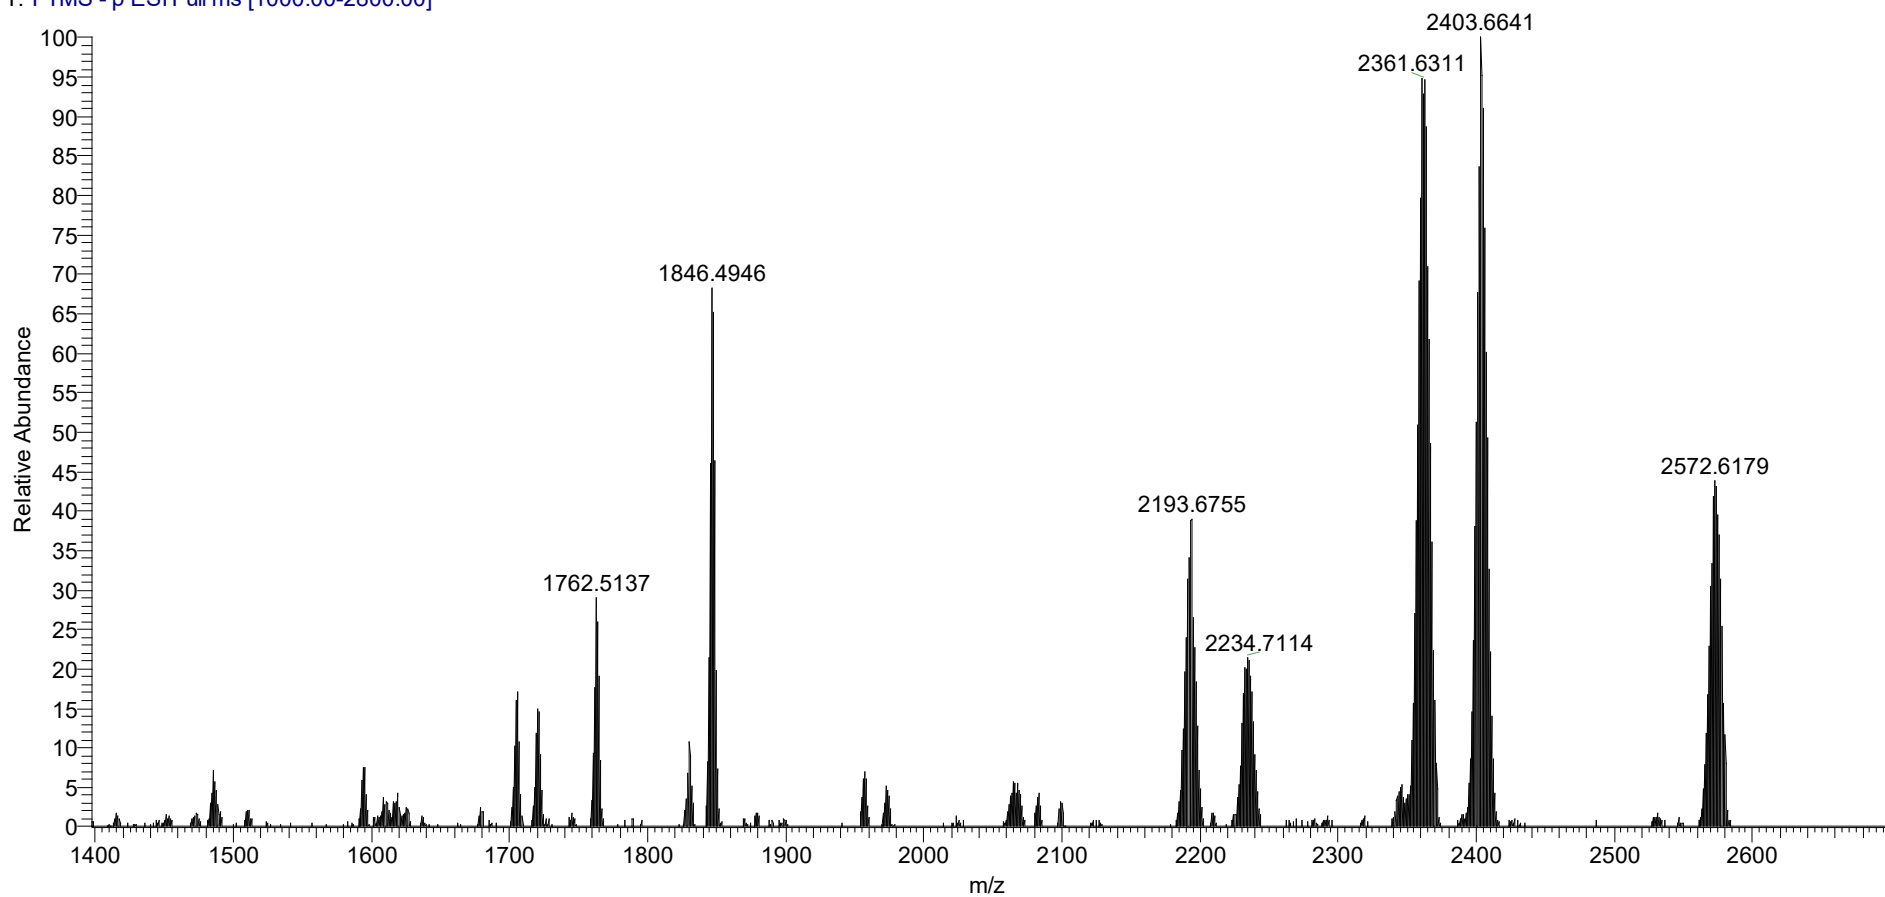



# Q Exactive High-Res Mass Spec

4-BrBn#1 RT: 0.01 AV: 1 NL: 5.12E5  
T: FTMS - p ESI Full ms [1000.00-2800.00]

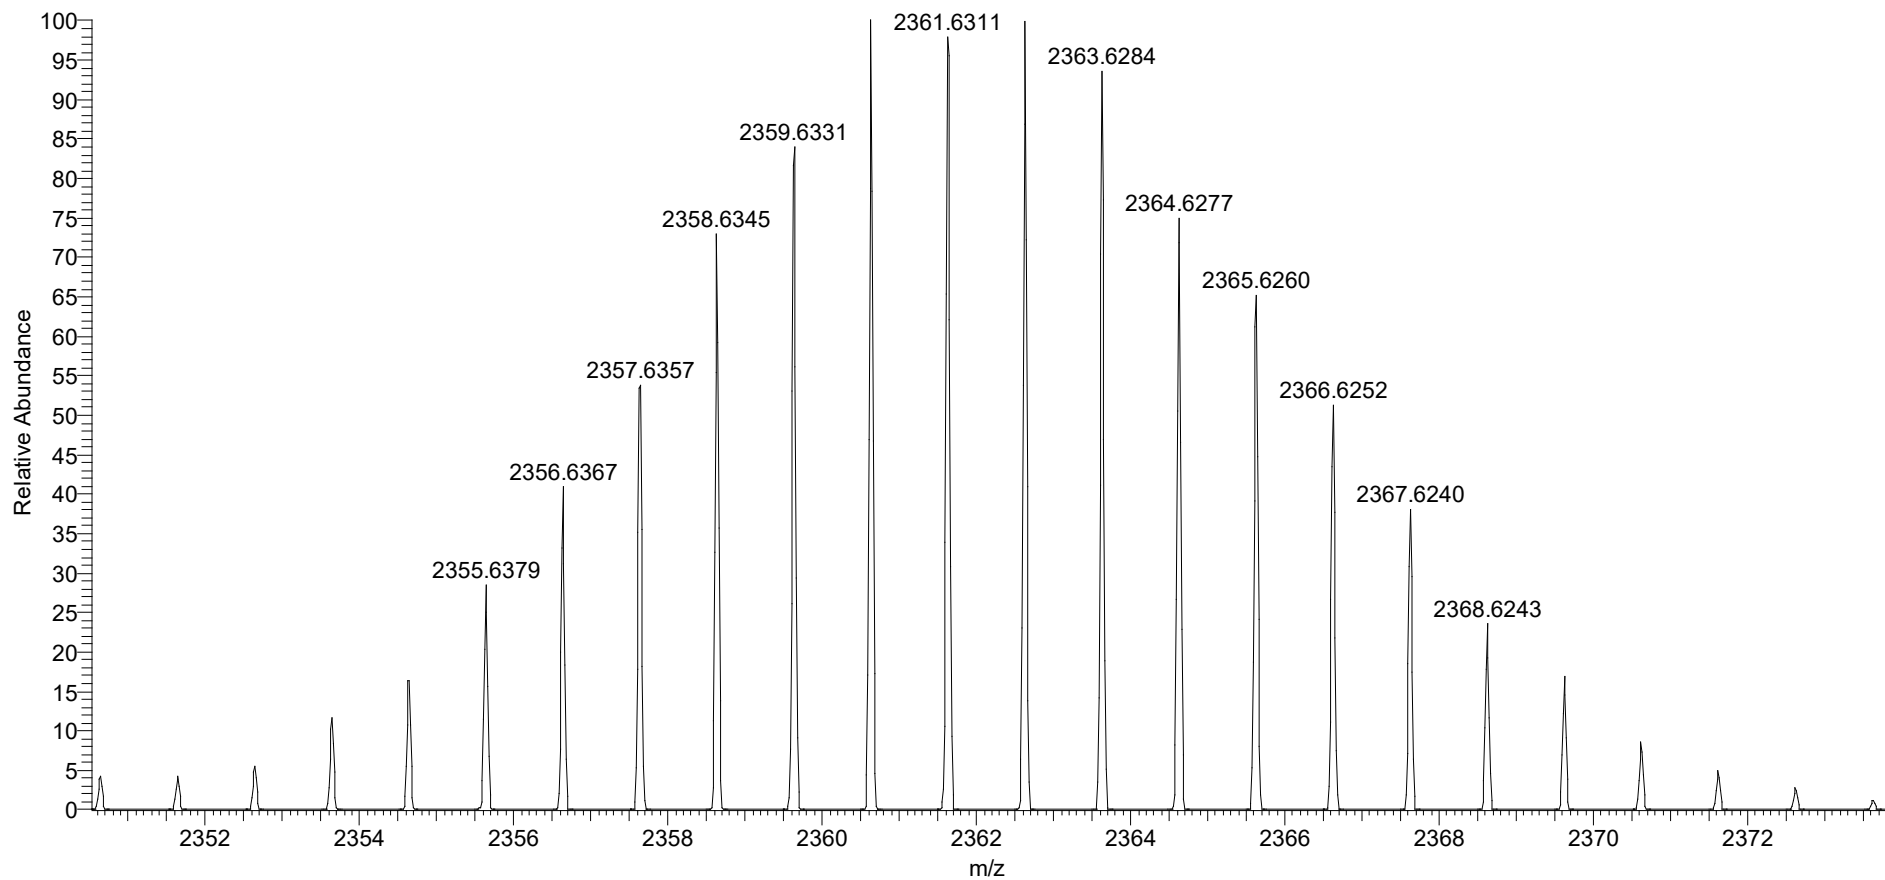

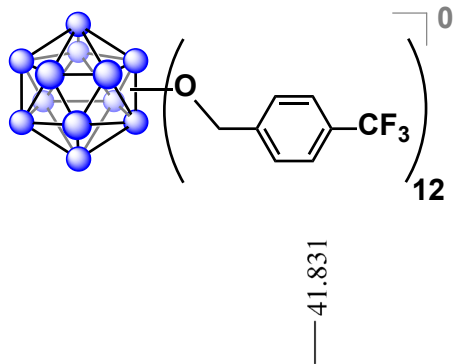

# $^{11}\text{B}$ $\{^1\text{H}\}$ NMR



Current Data Parameters  
 NAME B12(O-4-TFMBn)12  
 EXPNO 40  
 PROCNO 1

F2 - Acquisition Parameters  
 Date\_ 20150927  
 Time 14.58  
 INSTRUM av400  
 PROBHD 5 mm PABBO BB/  
 PULPROG zgdc.js  
 TD 5096  
 SOLVENT CDCl3  
 NS 1024  
 DS 0  
 SWH 51020.406 Hz  
 FIDRES 10.011854 Hz  
 AQ 0.0499408 sec  
 RG 189.85  
 DW 9.800 usec  
 DE 6.50 usec  
 TE 299.3 K  
 D1 0.05000000 sec  
 D11 0.03000000 sec  
 TD0 1

===== CHANNEL f1 =====  
 SFO1 128.3776052 MHz  
 NUC1  $^{11}\text{B}$   
 P1 10.00 usec  
 PLW1 52.00000000 W

===== CHANNEL f2 =====  
 SFO2 400.1324008 MHz  
 NUC2  $^1\text{H}$   
 CPDPRG[2] waltz16  
 PCPD2 90.00 usec  
 PLW2 13.00000000 W  
 PLW12 0.36111000 W

F2 - Processing parameters  
 SI 32768  
 SF 128.3776161 MHz  
 WDW EM  
 SSB 0  
 LB 10.00 Hz  
 GB 0  
 PC 1.40

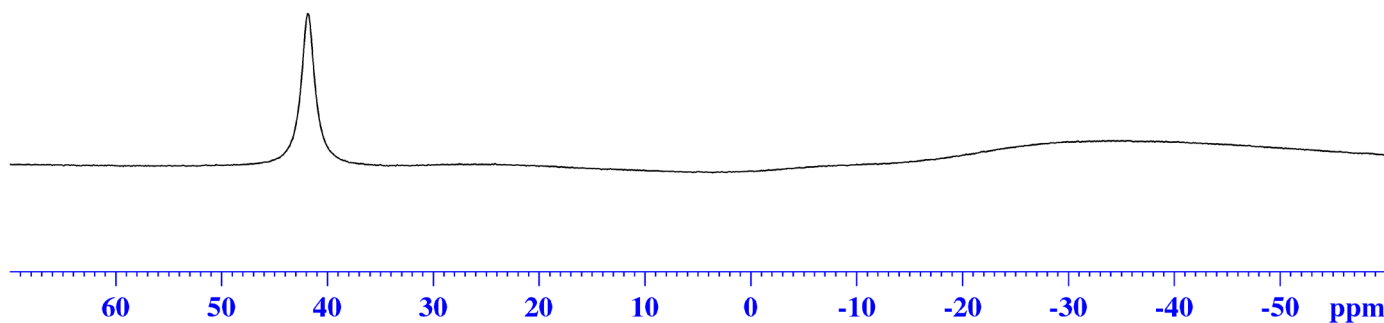

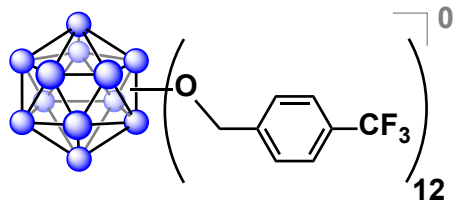

# <sup>13</sup>C NMR

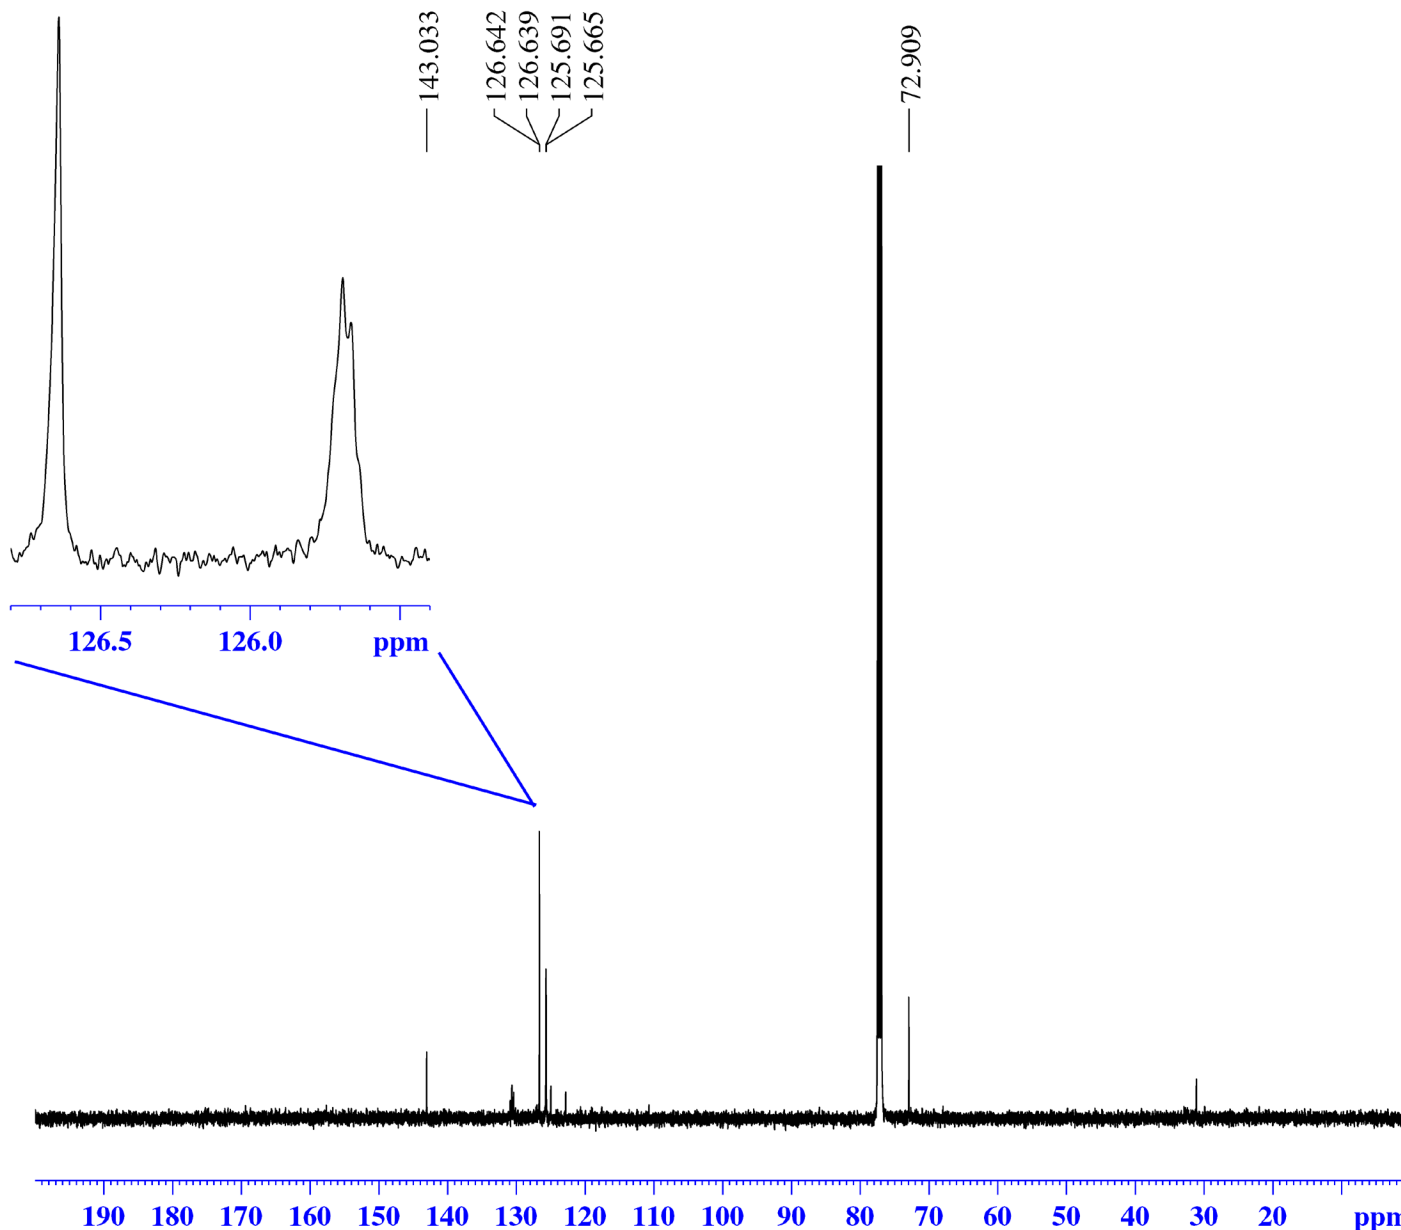

Current Data Parameters  
 NAME B12(O-4-TFMBn)12  
 EXPNO 20  
 PROCNO 1

F2 - Acquisition Parameters  
 Date\_ 20150928  
 Time 13.45  
 INSTRUM av500  
 PROBHD 5 mm DCH 13C-1  
 PULPROG zgpg30  
 TD 65536  
 SOLVENT CDCl3  
 NS 64  
 DS 2  
 SWH 31250.000 Hz  
 FIDRES 0.476837 Hz  
 AQ 1.0485760 sec  
 RG 204.54  
 DW 16.000 usec  
 DE 18.00 usec  
 TE 298.0 K  
 D1 2.00000000 sec  
 D11 0.03000000 sec  
 TD0 1

===== CHANNEL f1 =====  
 SFO1 125.7722511 MHz  
 NUC1 13C  
 P1 9.63 usec  
 PLW1 23.00000000 W

===== CHANNEL f2 =====  
 SFO2 500.1330008 MHz  
 NUC2 1H  
 CPDPRG[2] waltz16  
 PCPD2 80.00 usec  
 PLW2 13.50000000 W  
 PLW12 0.21094000 W  
 PLW13 0.13500001 W

F2 - Processing parameters  
 SI 131072  
 SF 125.7577722 MHz  
 WDW EM  
 SSB 0  
 LB 1.00 Hz  
 GB 0  
 PC 1.40

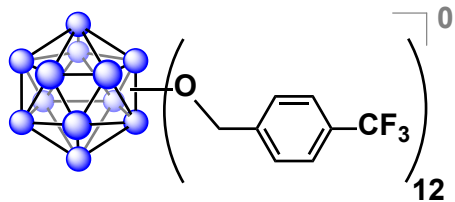

# <sup>19</sup>F NMR

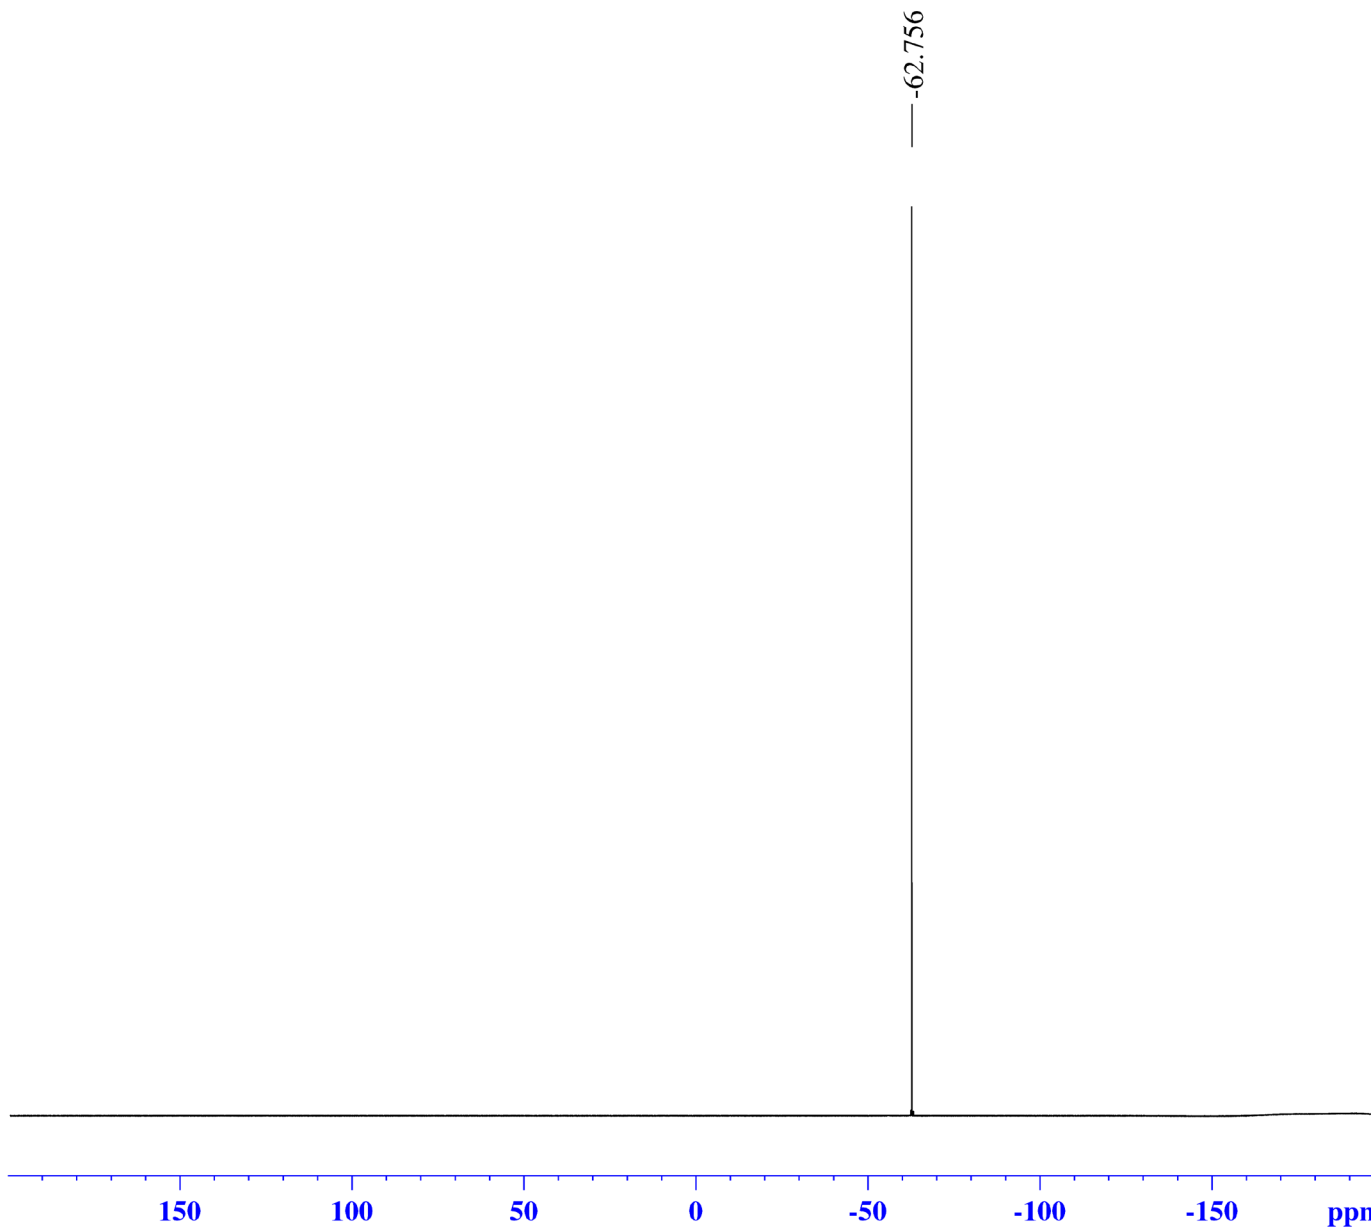

Current Data Parameters  
 NAME B12(O-4-TFMBn)12  
 EXPNO 42  
 PROCNO 1

F2 - Acquisition Parameters  
 Date\_ 20150927  
 Time 15.05  
 INSTRUM av400  
 PROBHD 5 mm PABBO BB/  
 PULPROG zgfgqn30  
 TD 262144  
 SOLVENT CDCl3  
 NS 64  
 DS 0  
 SWH 150000.000 Hz  
 FIDRES 0.572205 Hz  
 AQ 0.8738133 sec  
 RG 189.85  
 DW 3.333 usec  
 DE 6.50 usec  
 TE 299.0 K  
 D1 2.00000000 sec  
 TD0 1

===== CHANNEL f1 =====  
 SFO1 376.4983660 MHz  
 NUC1 19F  
 P1 14.50 usec  
 PLW1 17.00000000 W

F2 - Processing parameters  
 SI 262144  
 SF 376.4983660 MHz  
 WDW EM  
 SSB 0  
 LB 1.00 Hz  
 GB 0  
 PC 1.00



# <sup>1</sup>H NMR



7.430  
7.409  
7.107  
7.087

5.272

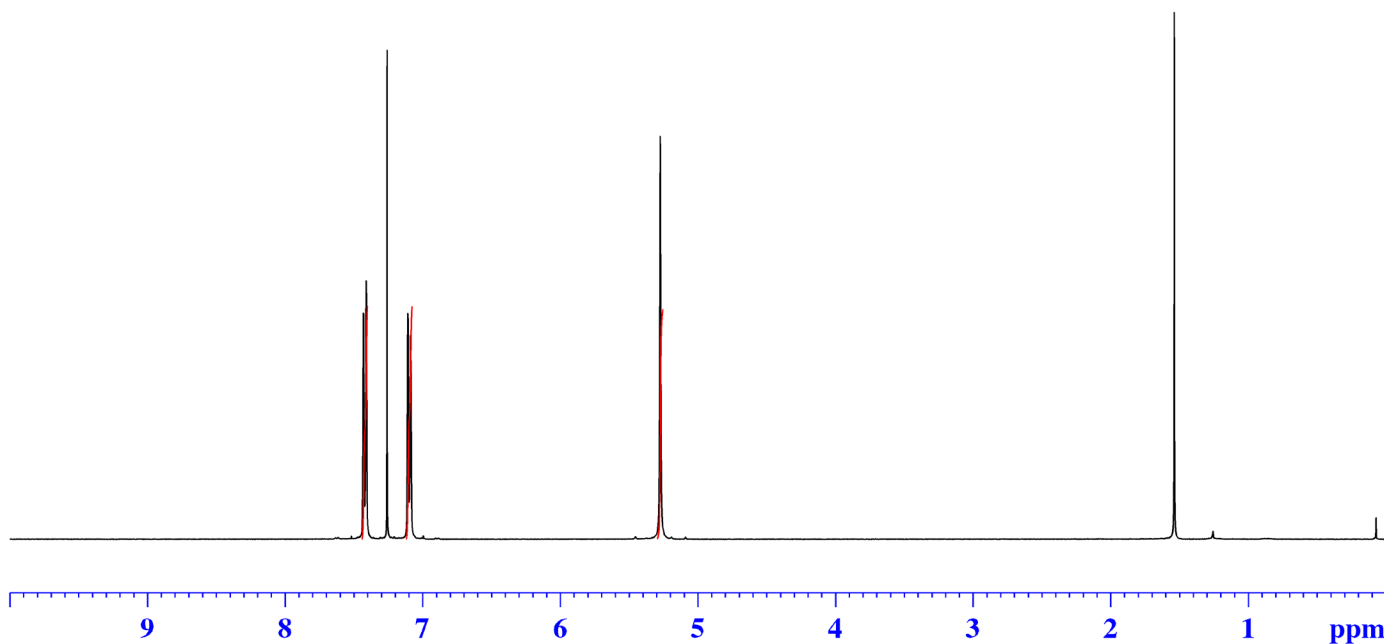

24.000  
24.125

23.777

Current Data Parameters  
NAME B12(O-4-TFMBn)12  
EXPNO 41  
PROCNO 1

F2 - Acquisition Parameters  
Date\_ 20150927  
Time 15.01  
INSTRUM av400  
PROBHD 5 mm PABBO BB/  
PULPROG zg30  
TD 52882  
SOLVENT CDCl<sub>3</sub>  
NS 32  
DS 0  
SWH 8012.820 Hz  
FIDRES 0.151523 Hz  
AQ 3.2998369 sec  
RG 189.85  
DW 62.400 usec  
DE 6.50 usec  
TE 299.0 K  
D1 2.00000000 sec  
TD0 1

===== CHANNEL f1 =====  
SFO1 400.1324008 MHz  
NUC1 1H  
P1 15.00 usec  
PLW1 13.00000000 W

F2 - Processing parameters  
SI 65536  
SF 400.1300184 MHz  
WDW EM  
SSB 0  
LB 0.30 Hz  
GB 0  
PC 1.00



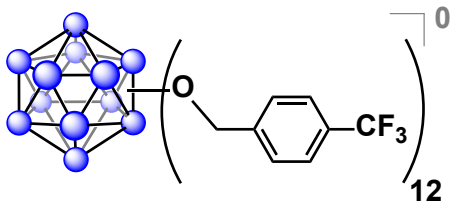

# Q Exactive High-Res Mass Spec

4-TFMBn#1 RT: 0.01 AV: 1 NL: 6.16E4  
T: FTMS - p ESI Full ms [800.00-2500.00]

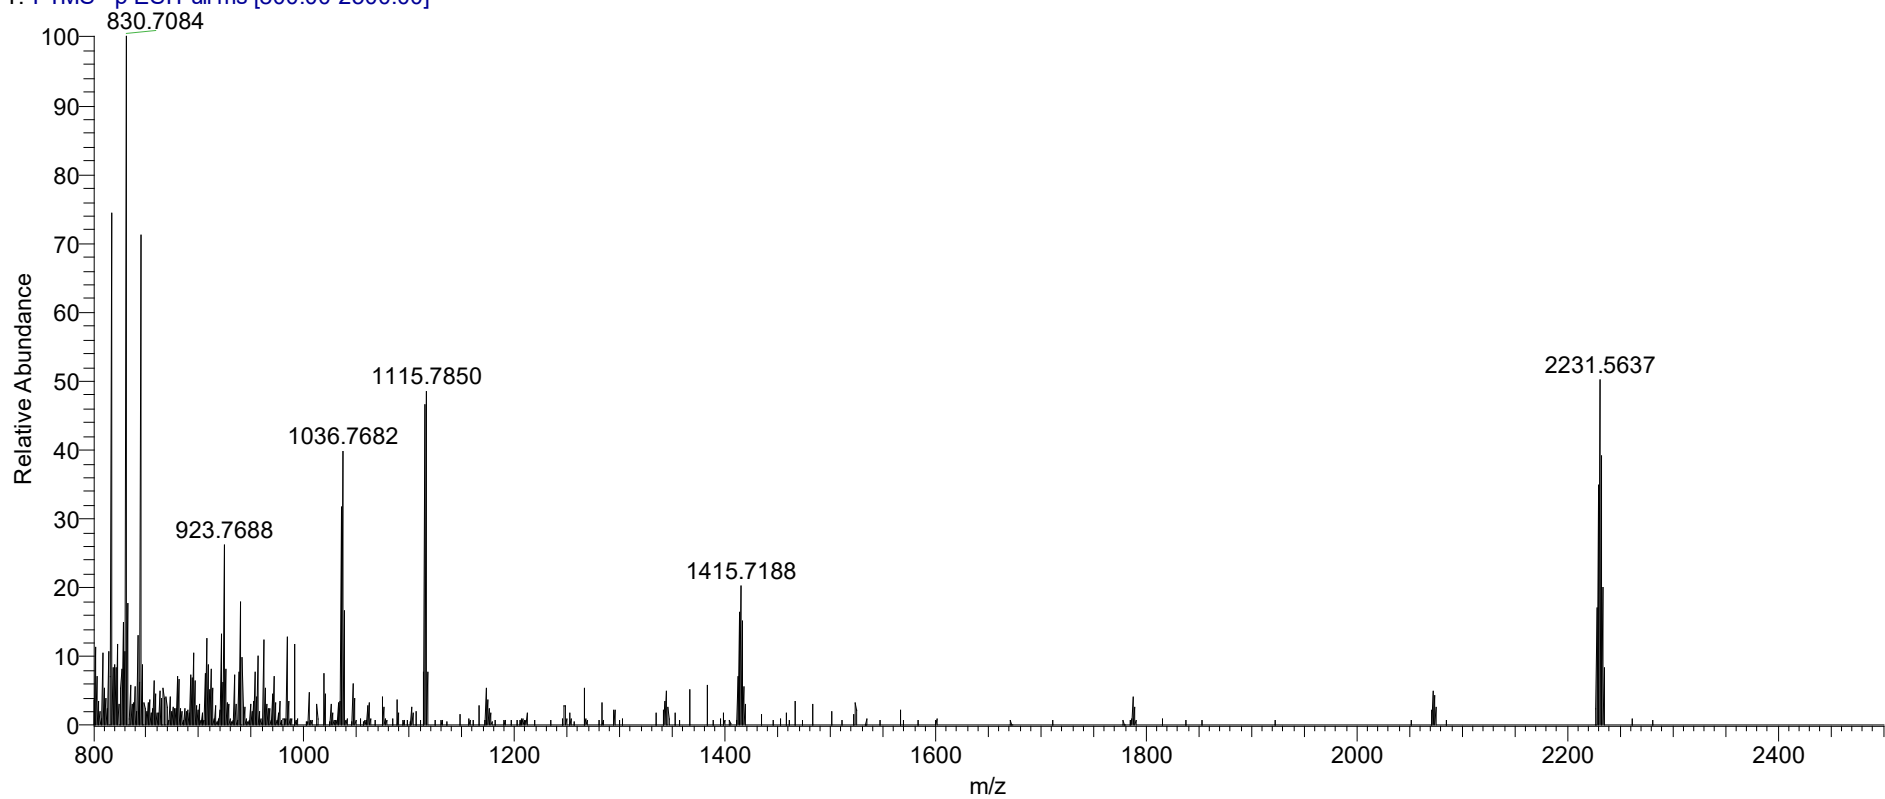



# Q Exactive High-Res Mass Spec

4-TFMBn#1 RT: 0.01 AV: 1 NL: 3.09E4  
T: FTMS - p ESI Full ms [800.00-2500.00]

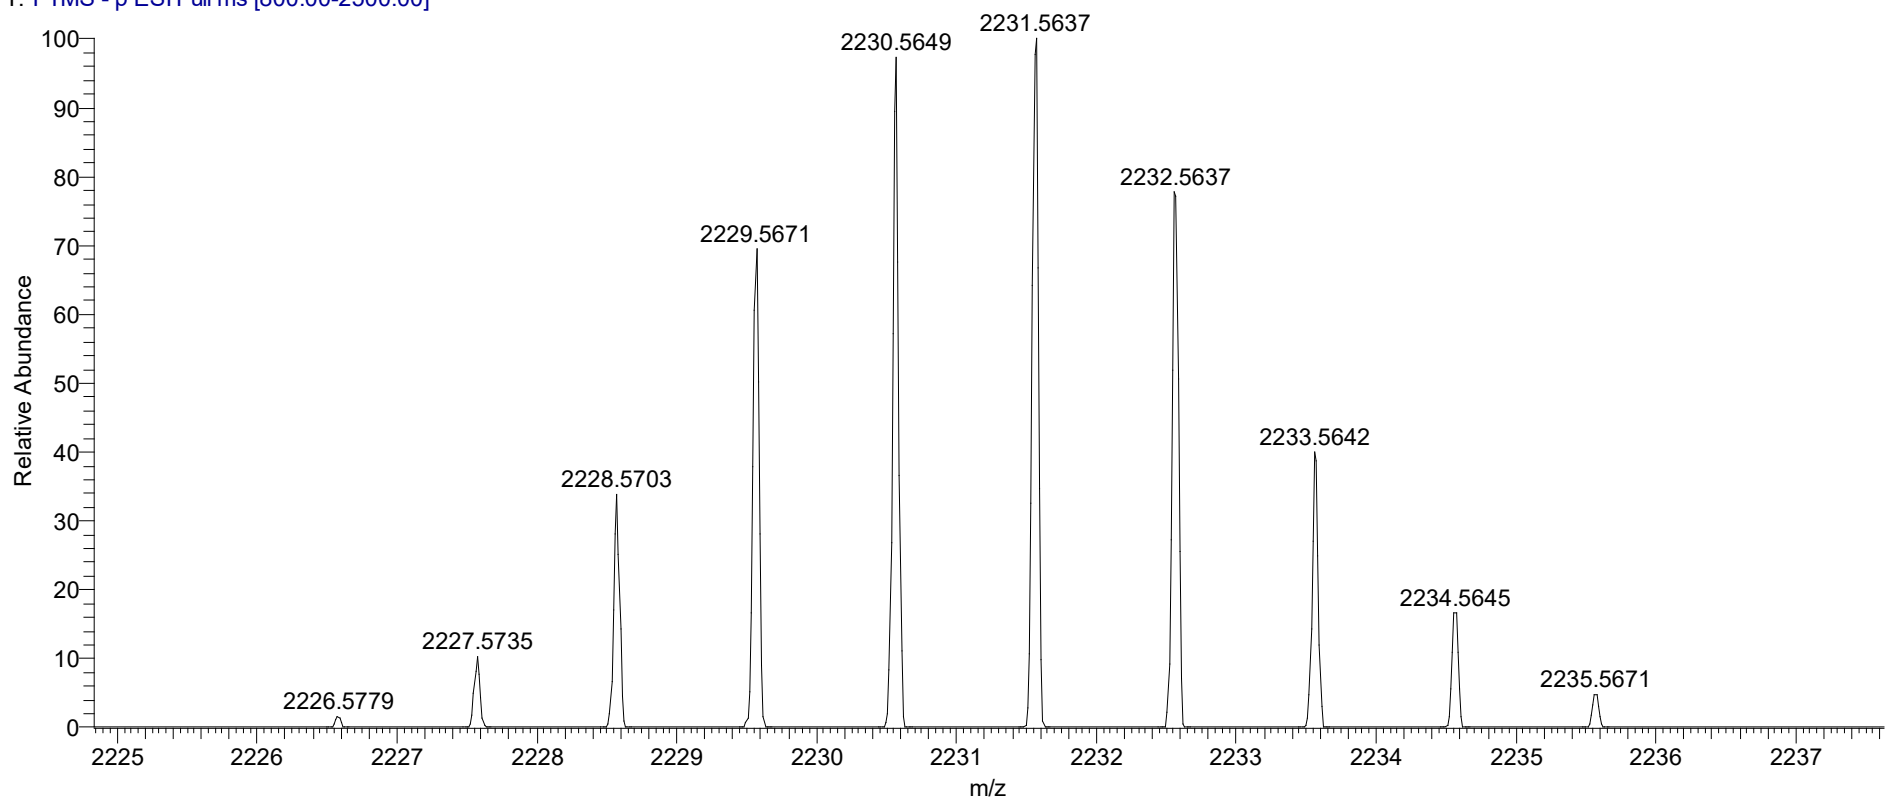

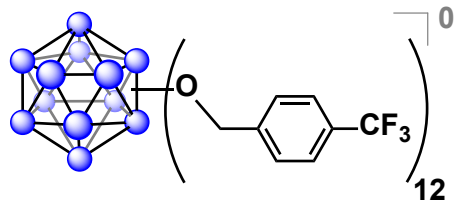

IR

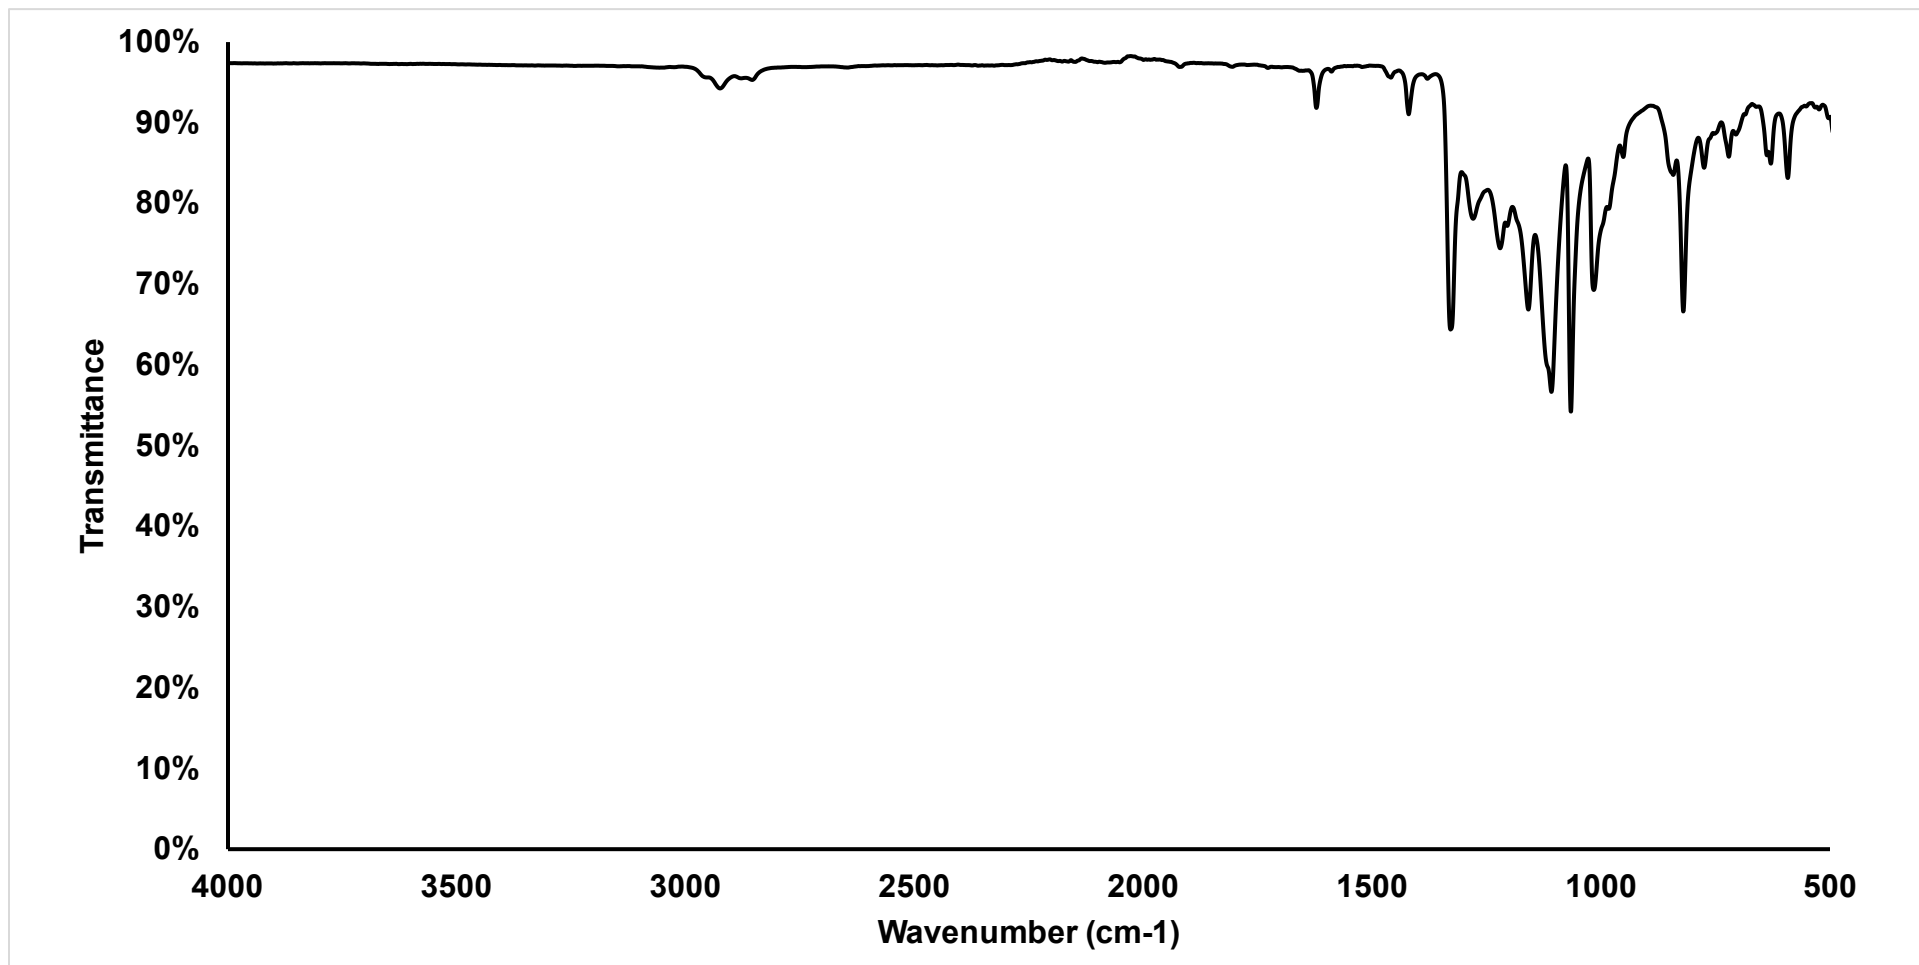

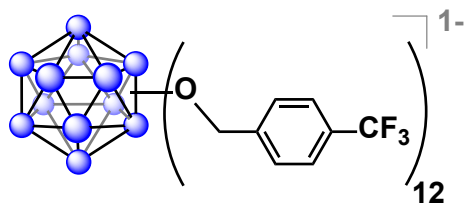

IR

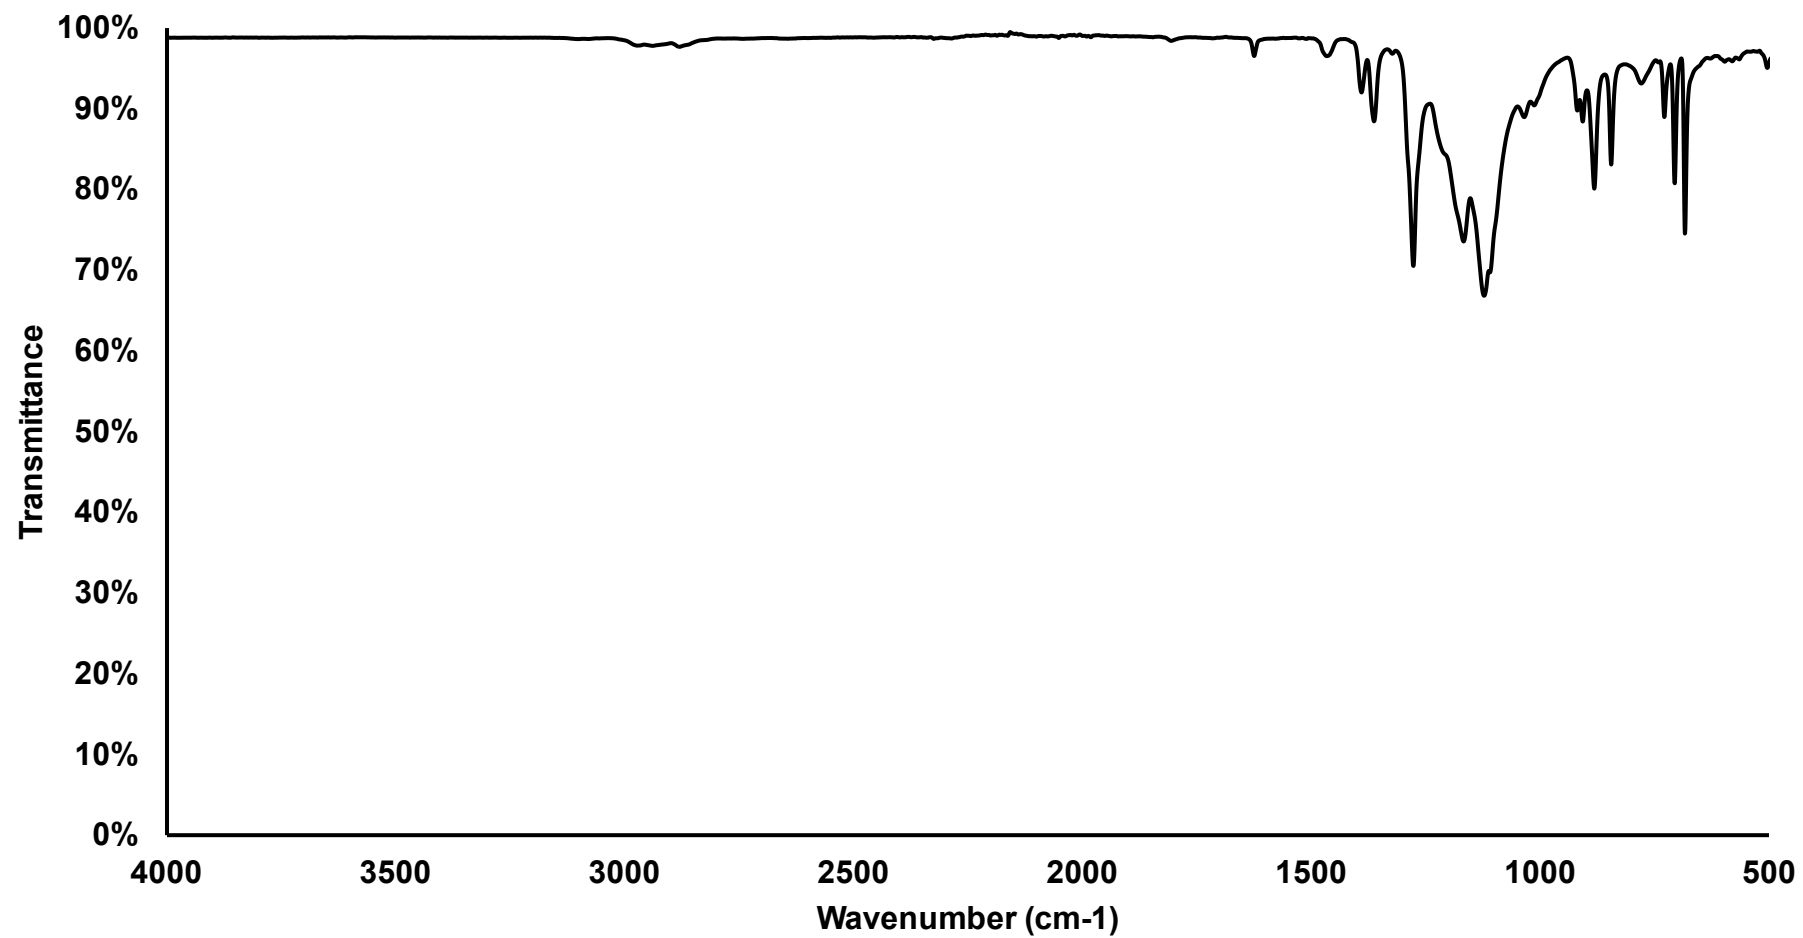

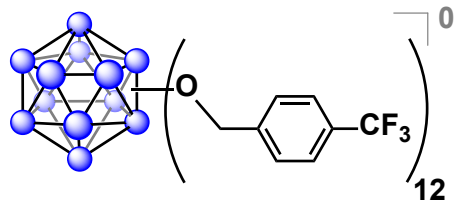

IR

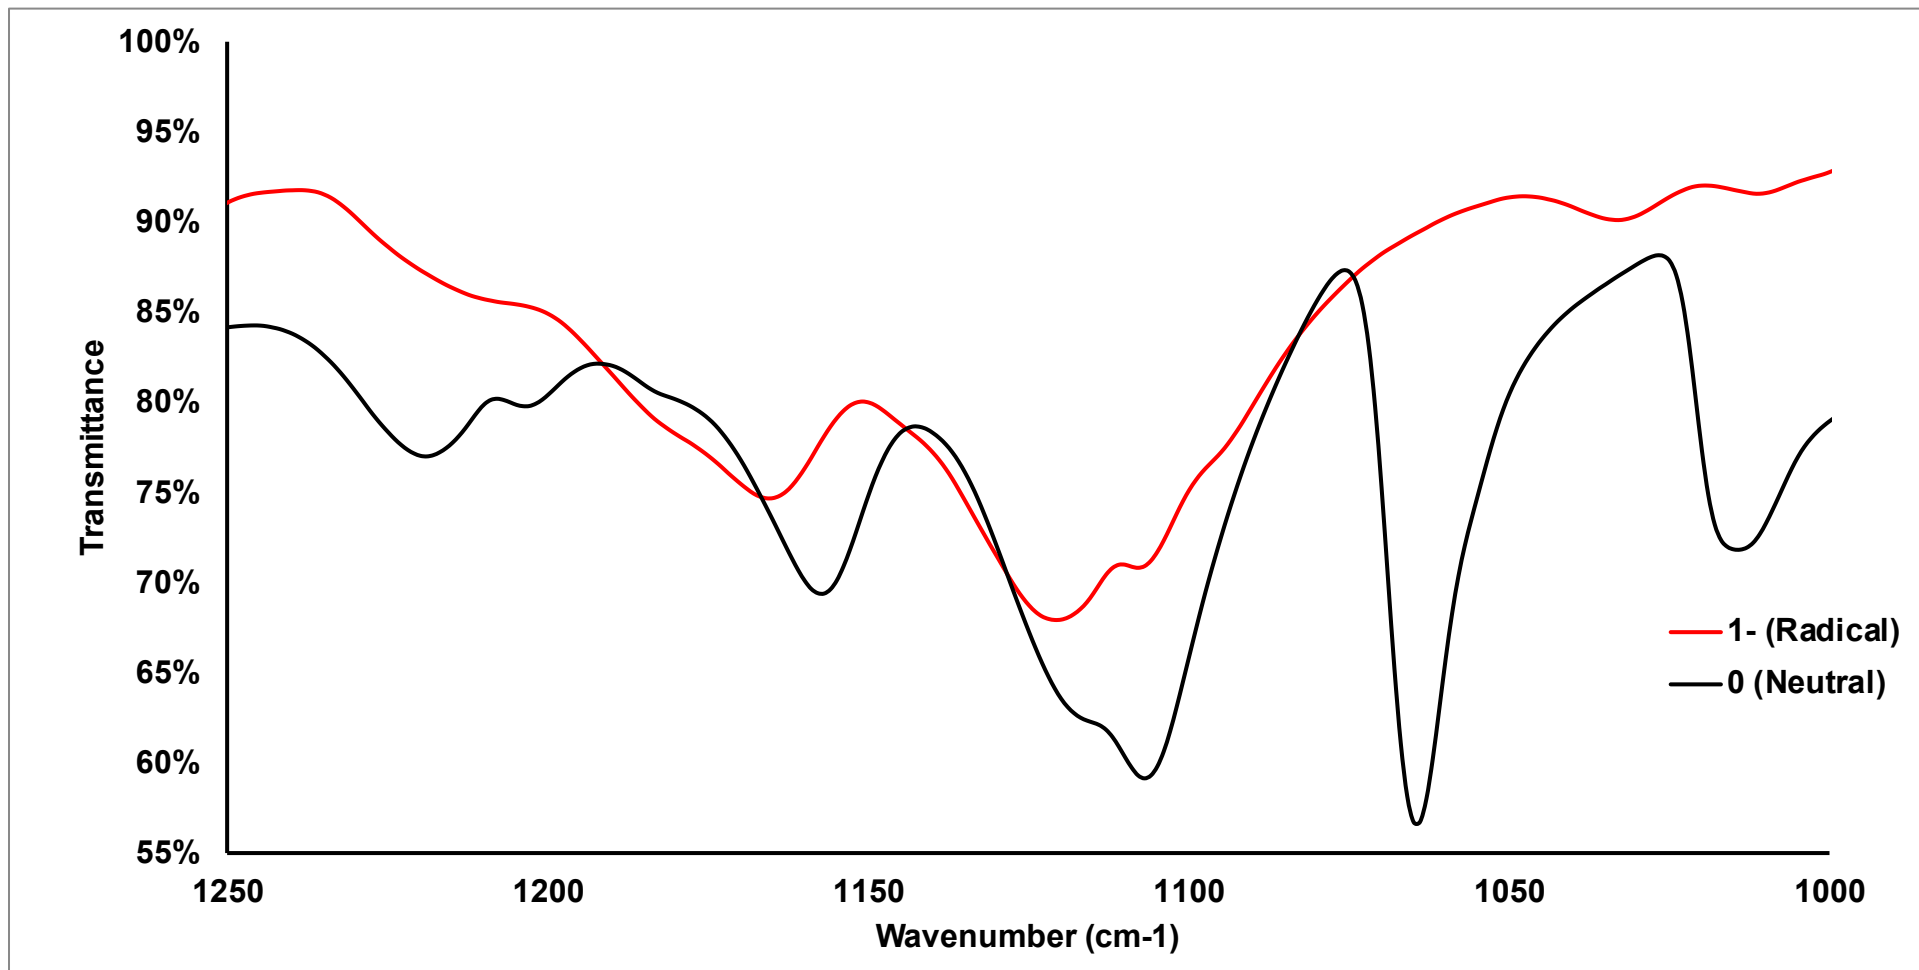

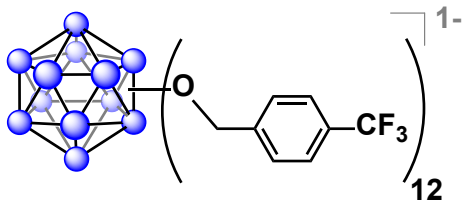

# EPR

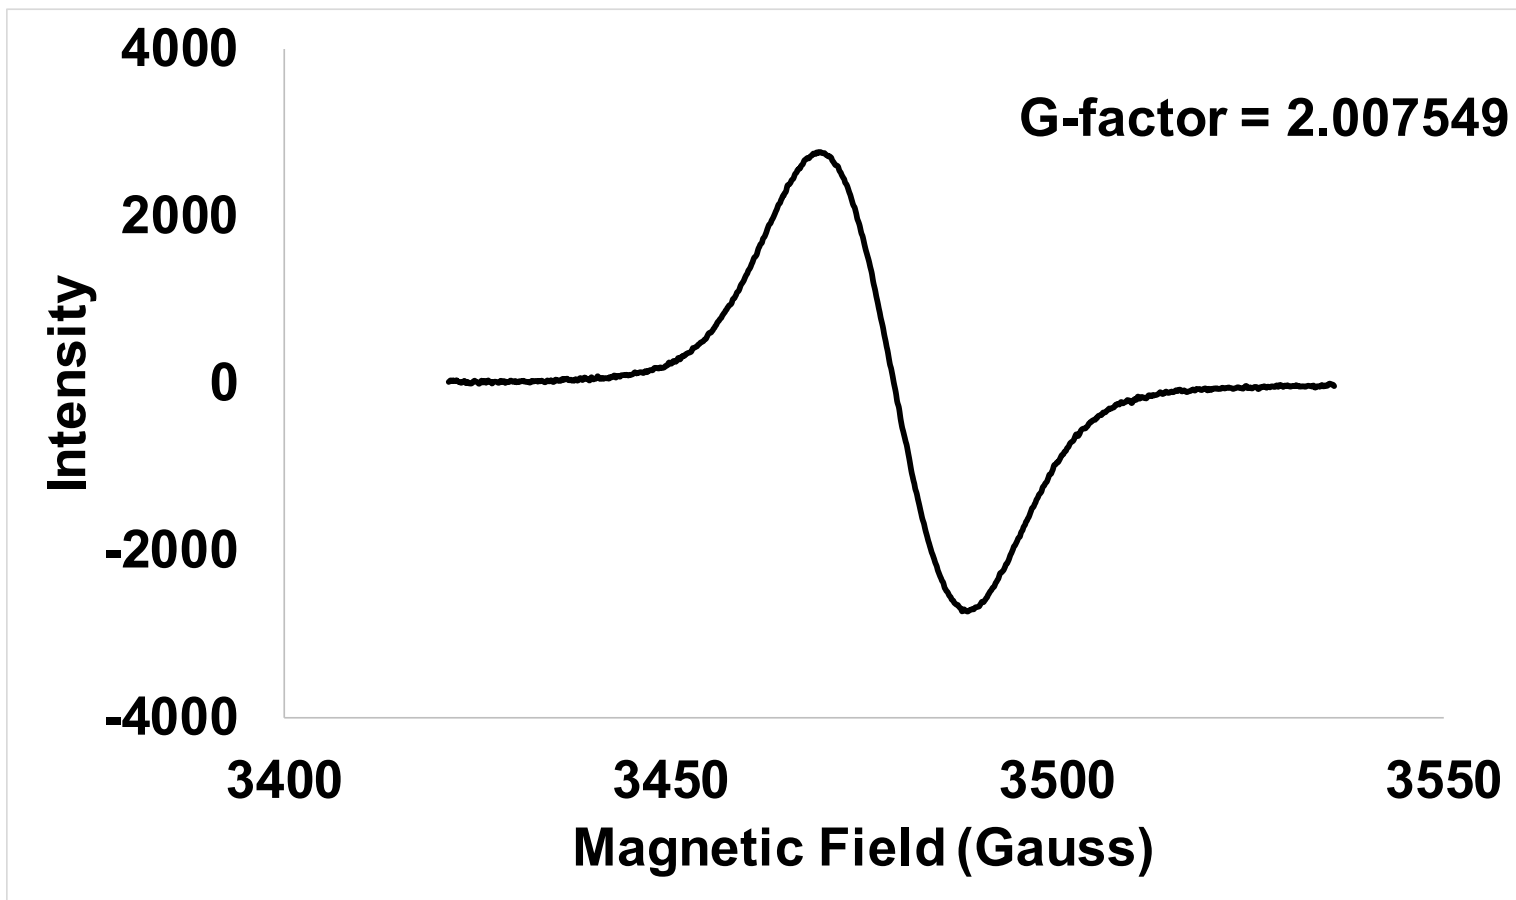

DOS Format  
 ANZ 1024  
 MIN -2733.186523  
 MAX 2772.813477  
 JSS 0  
 GST 3421.274884  
 GSI 114.543004  
 JUN G  
 JON Bruker BioSpin GmbH  
 JDA 9/25/2015  
 JTM 13:33  
 JRE c:\programfiles\bruker-  
 emx\syscal\st0103.cal  
 JEX field-sweep  
 JSD 1  
 HCF 3478.546386  
 HSW 114.543004  
 EMF 0  
 RCT 20.48  
 RTC 20.48  
 RRG 8.93E+03  
 RMA 4  
 MF 9.773981  
 MP 6.38E-01  
 MPD 25

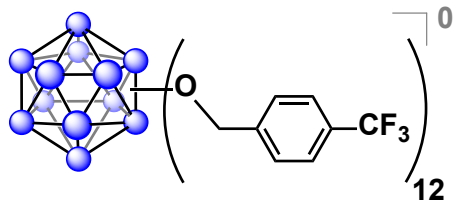

**B 1s XPS**

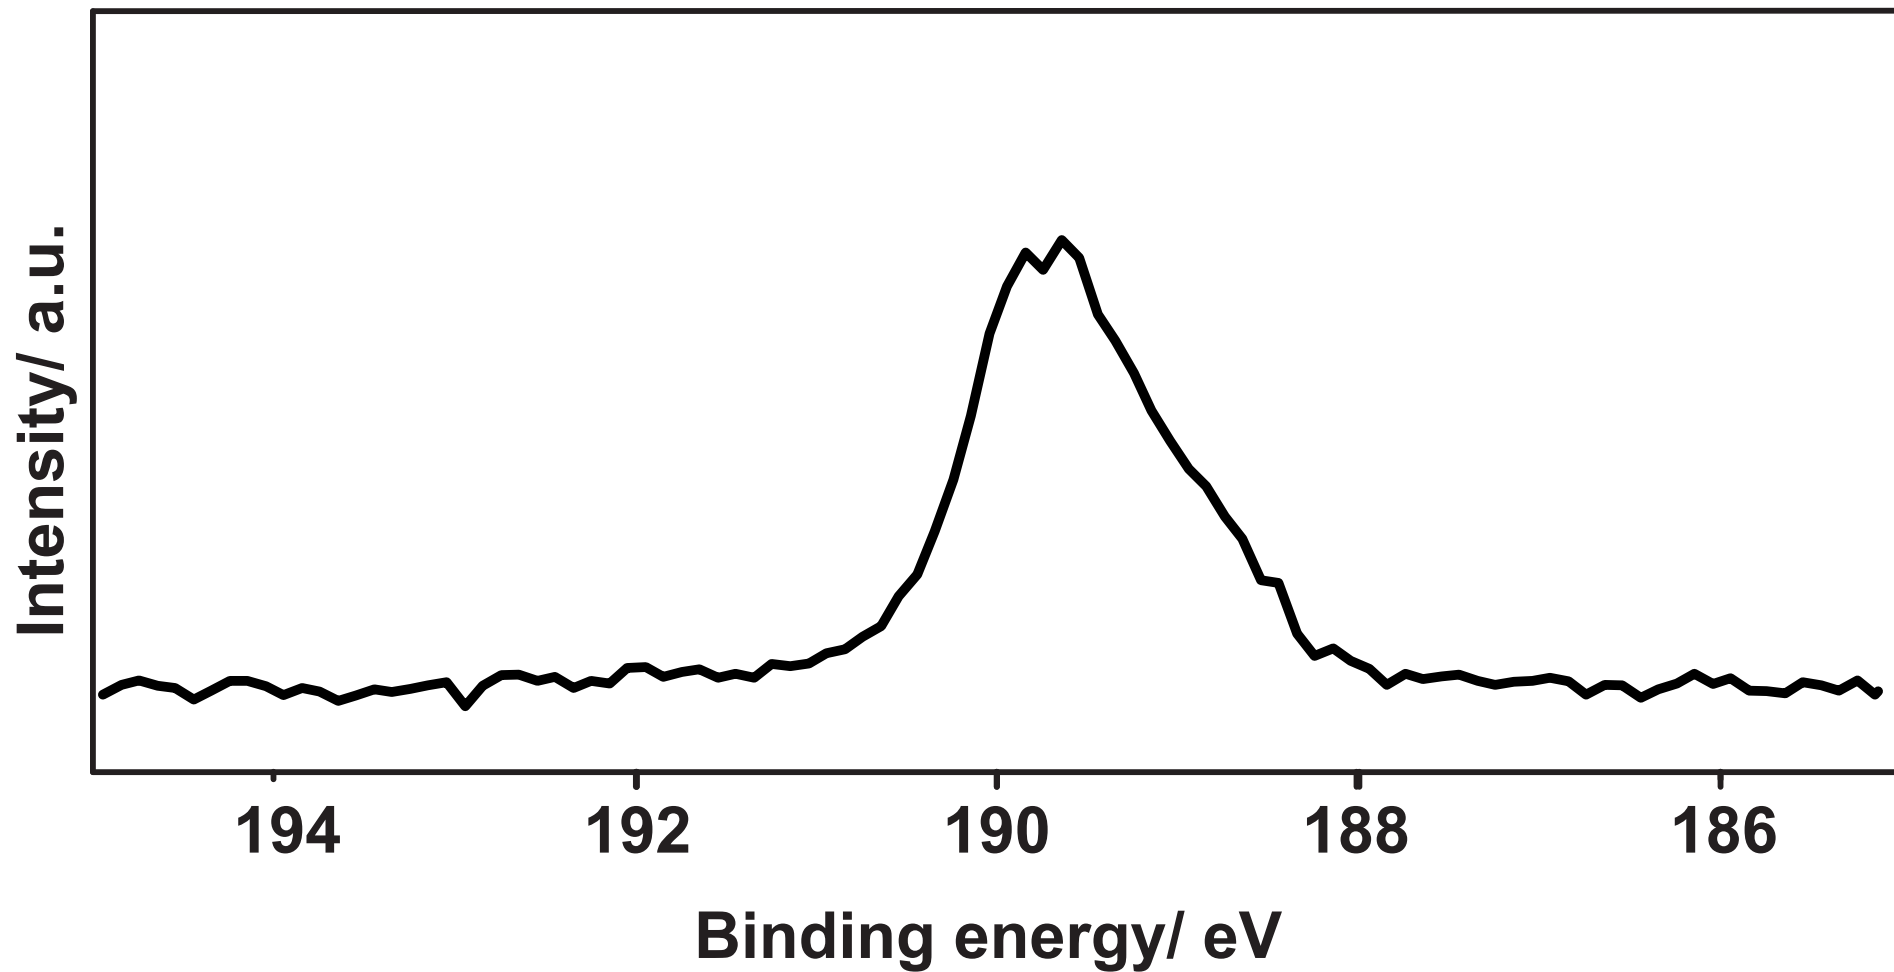

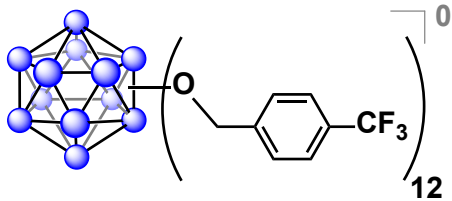

### Cyclic voltammetry

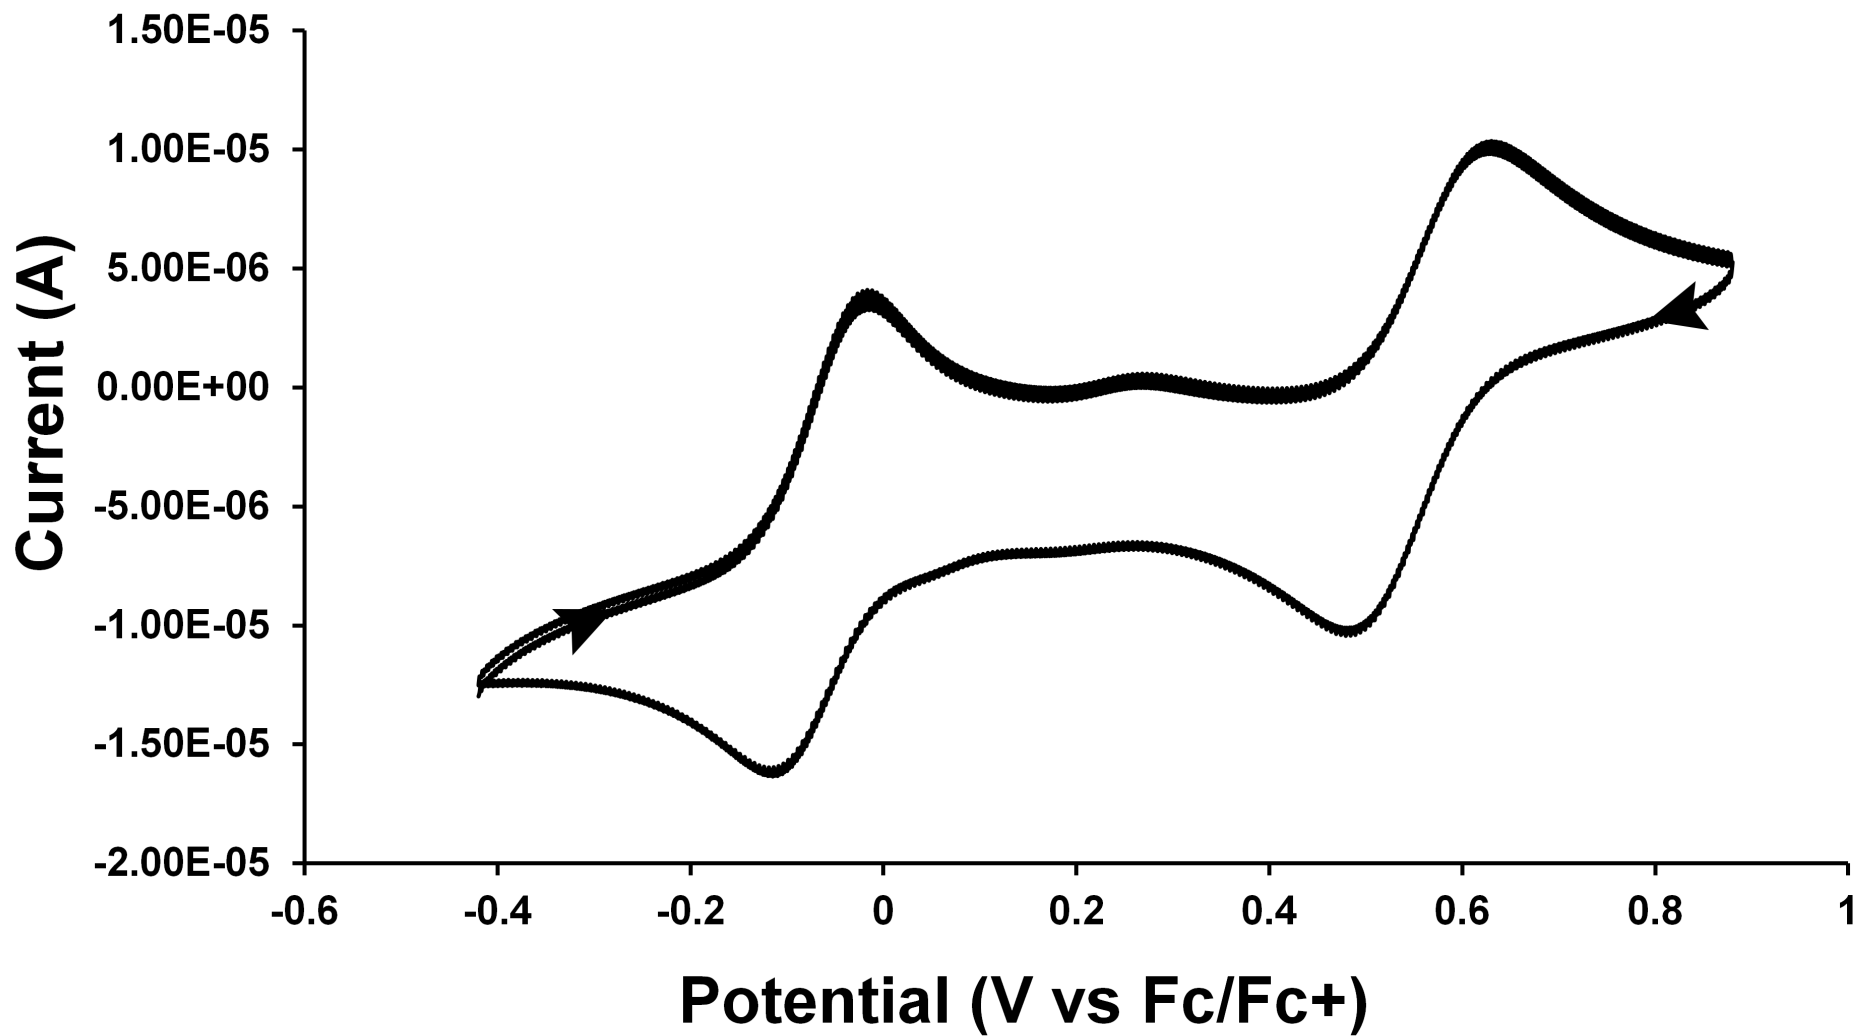



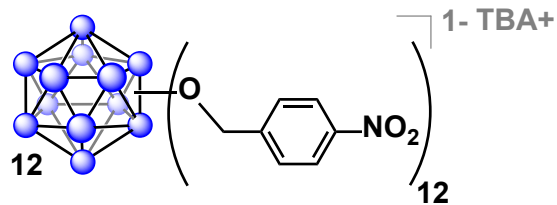

# $^{11}\text{B}$ $\{^1\text{H}\}$ NMR



Current Data Parameters  
 NAME B12(O-4-NO2Bn)12  
 EXPNO 60  
 PROCNO 1

F2 - Acquisition Parameters  
 Date\_ 20151101  
 Time 19.40  
 INSTRUM av400  
 PROBHD 5 mm PABBO BB/  
 PULPROG zgdc.js  
 TD 5096  
 SOLVENT Acetone  
 NS 1024  
 DS 0  
 SWH 51020.406 Hz  
 FIDRES 10.011854 Hz  
 AQ 0.0499408 sec  
 RG 189.85  
 DW 9.800 usec  
 DE 6.50 usec  
 TE 299.0 K  
 D1 0.05000000 sec  
 D11 0.03000000 sec  
 TD0 1

===== CHANNEL f1 =====  
 SFO1 128.3776052 MHz  
 NUC1  $^{11}\text{B}$   
 P1 10.00 usec  
 PLW1 52.00000000 W

===== CHANNEL f2 =====  
 SFO2 400.1324008 MHz  
 NUC2  $^1\text{H}$   
 CPDPRG[2] waltz16  
 PCPD2 90.00 usec  
 PLW2 13.00000000 W  
 PLW12 0.36111000 W

F2 - Processing parameters  
 SI 32768  
 SF 128.3776161 MHz  
 WDW EM  
 SSB 0  
 LB 10.00 Hz  
 GB 0  
 PC 1.40

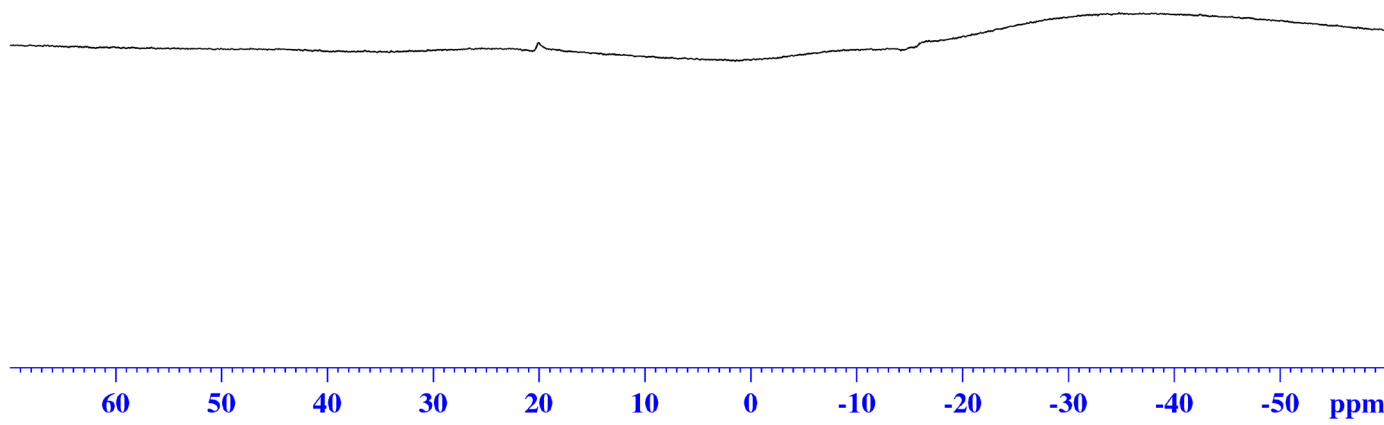

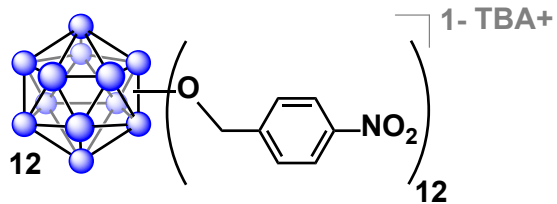

# <sup>13</sup>C NMR



- 191.263
- 147.468
- 140.585
- 130.545
- 124.235

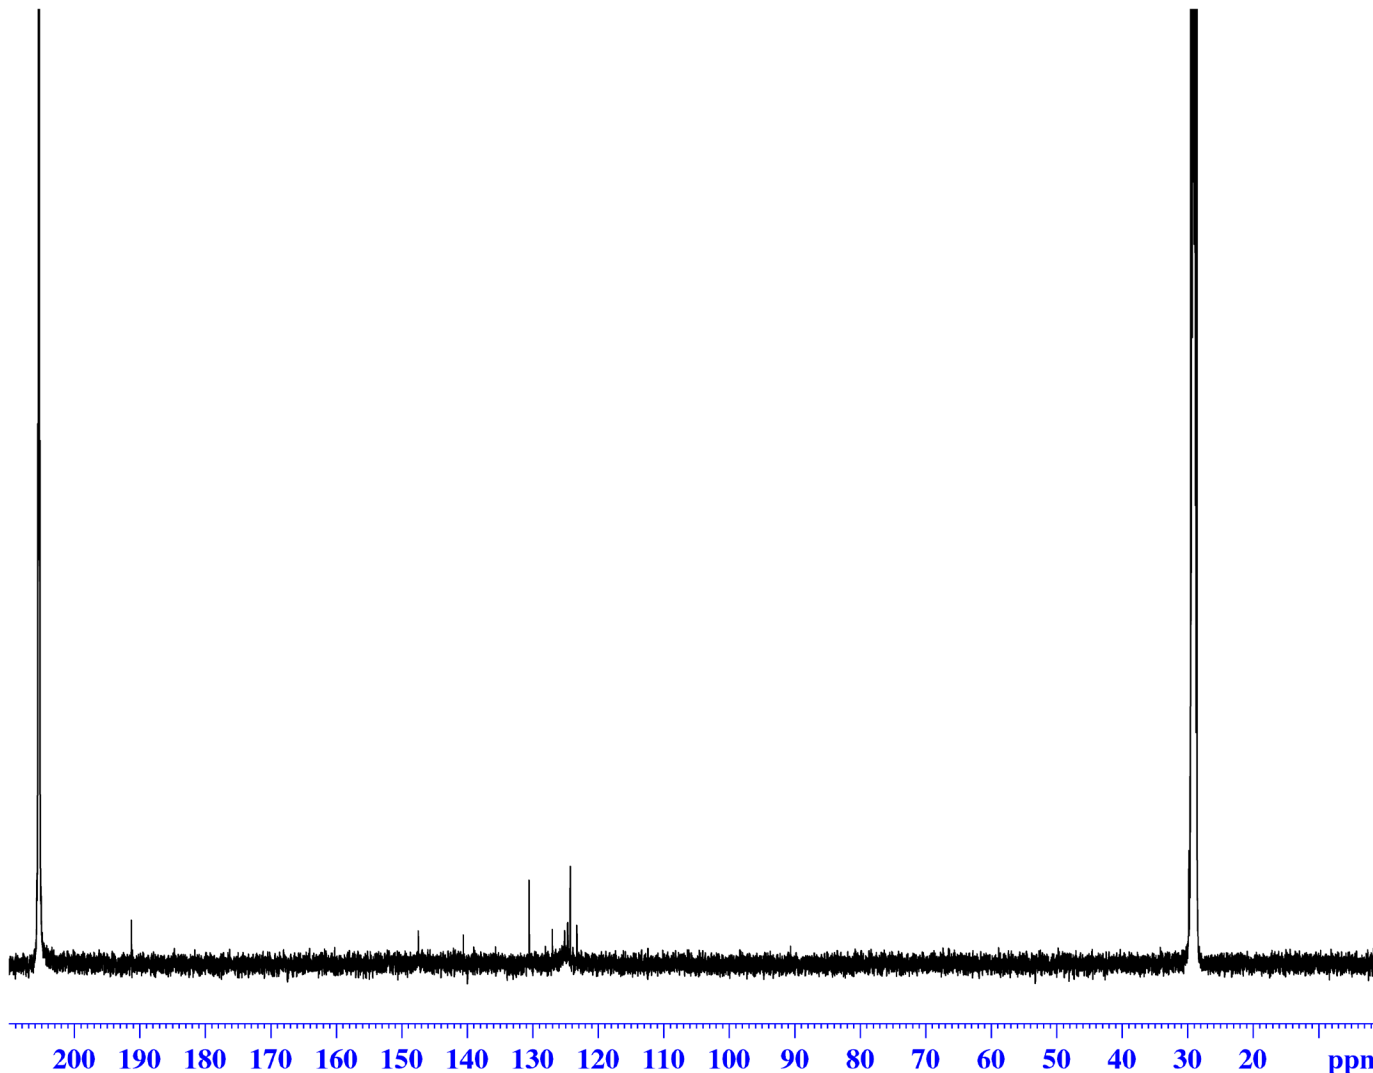

Current Data Parameters  
 NAME B12(O-4-NO2Bn)12  
 EXPNO 10  
 PROCNO 1

F2 - Acquisition Parameters  
 Date\_ 20151103  
 Time 11.12  
 INSTRUM av500  
 PROBHD 5 mm DCH 13C-1  
 PULPROG zgpg30  
 TD 65536  
 SOLVENT Acetone  
 NS 128  
 DS 2  
 SWH 31250.000 Hz  
 FIDRES 0.476837 Hz  
 AQ 1.0485760 sec  
 RG 204.54  
 DW 16.000 usec  
 DE 18.00 usec  
 TE 298.0 K  
 D1 2.00000000 sec  
 D11 0.03000000 sec  
 TD0 1

===== CHANNEL f1 =====  
 SFO1 125.7722511 MHz  
 NUC1 13C  
 P1 9.63 usec  
 PLW1 23.00000000 W

===== CHANNEL f2 =====  
 SFO2 500.1330008 MHz  
 NUC2 1H  
 CPDPRG[2] waltz16  
 PCPD2 80.00 usec  
 PLW2 13.50000000 W  
 PLW12 0.21094000 W  
 PLW13 0.13500001 W

F2 - Processing parameters  
 SI 131072  
 SF 125.7577890 MHz  
 WDW EM  
 SSB 0  
 LB 1.00 Hz  
 GB 0  
 PC 1.40

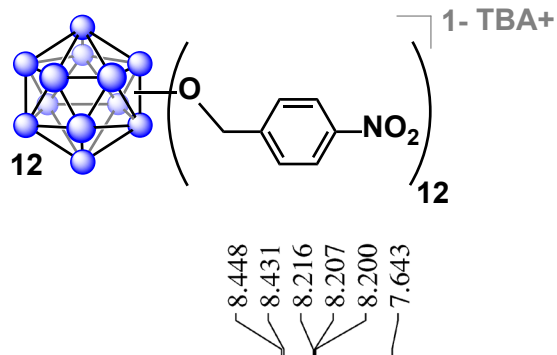

# <sup>1</sup>H NMR



Current Data Parameters  
 NAME B12(O-4-NO2Bn)12  
 EXPNO 11  
 PROCNO 1

F2 - Acquisition Parameters  
 Date\_ 20151103  
 Time 11.16  
 INSTRUM av500  
 PROBHD 5 mm DCH 13C-1  
 PULPROG zg30  
 TD 65536  
 SOLVENT Acetone  
 NS 32  
 DS 0  
 SWH 10000.000 Hz  
 FIDRES 0.152588 Hz  
 AQ 3.2767999 sec  
 RG 52.41  
 DW 50.000 usec  
 DE 10.00 usec  
 TE 298.0 K  
 D1 2.00000000 sec  
 TD0 1

===== CHANNEL f1 =====  
 SFO1 500.1330008 MHz  
 NUC1 1H  
 P1 10.00 usec  
 PLW1 13.50000000 W

F2 - Processing parameters  
 SI 65536  
 SF 500.1300146 MHz  
 WDW EM  
 SSB 0  
 LB 0.30 Hz  
 GB 0  
 PC 1.00

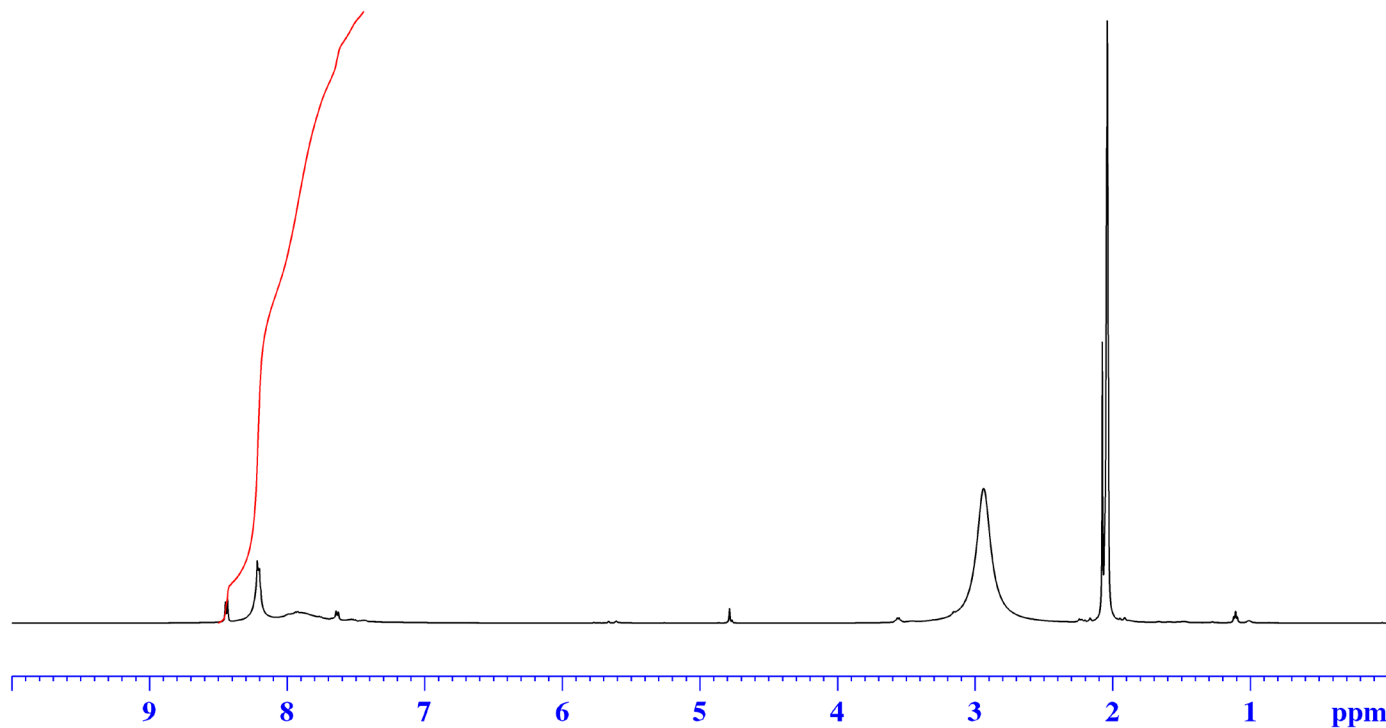

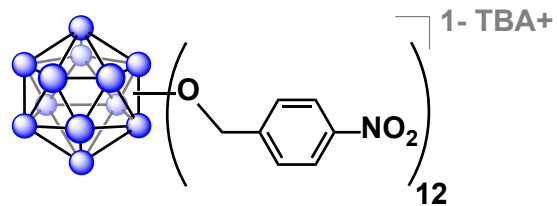

# Q Exactive High-Res Mass Spec

Nitro #1 RT: 0.01 AV: 1 NL: 3.75E5  
T: FTMS - p ESI Full ms [500.00-2500.00]

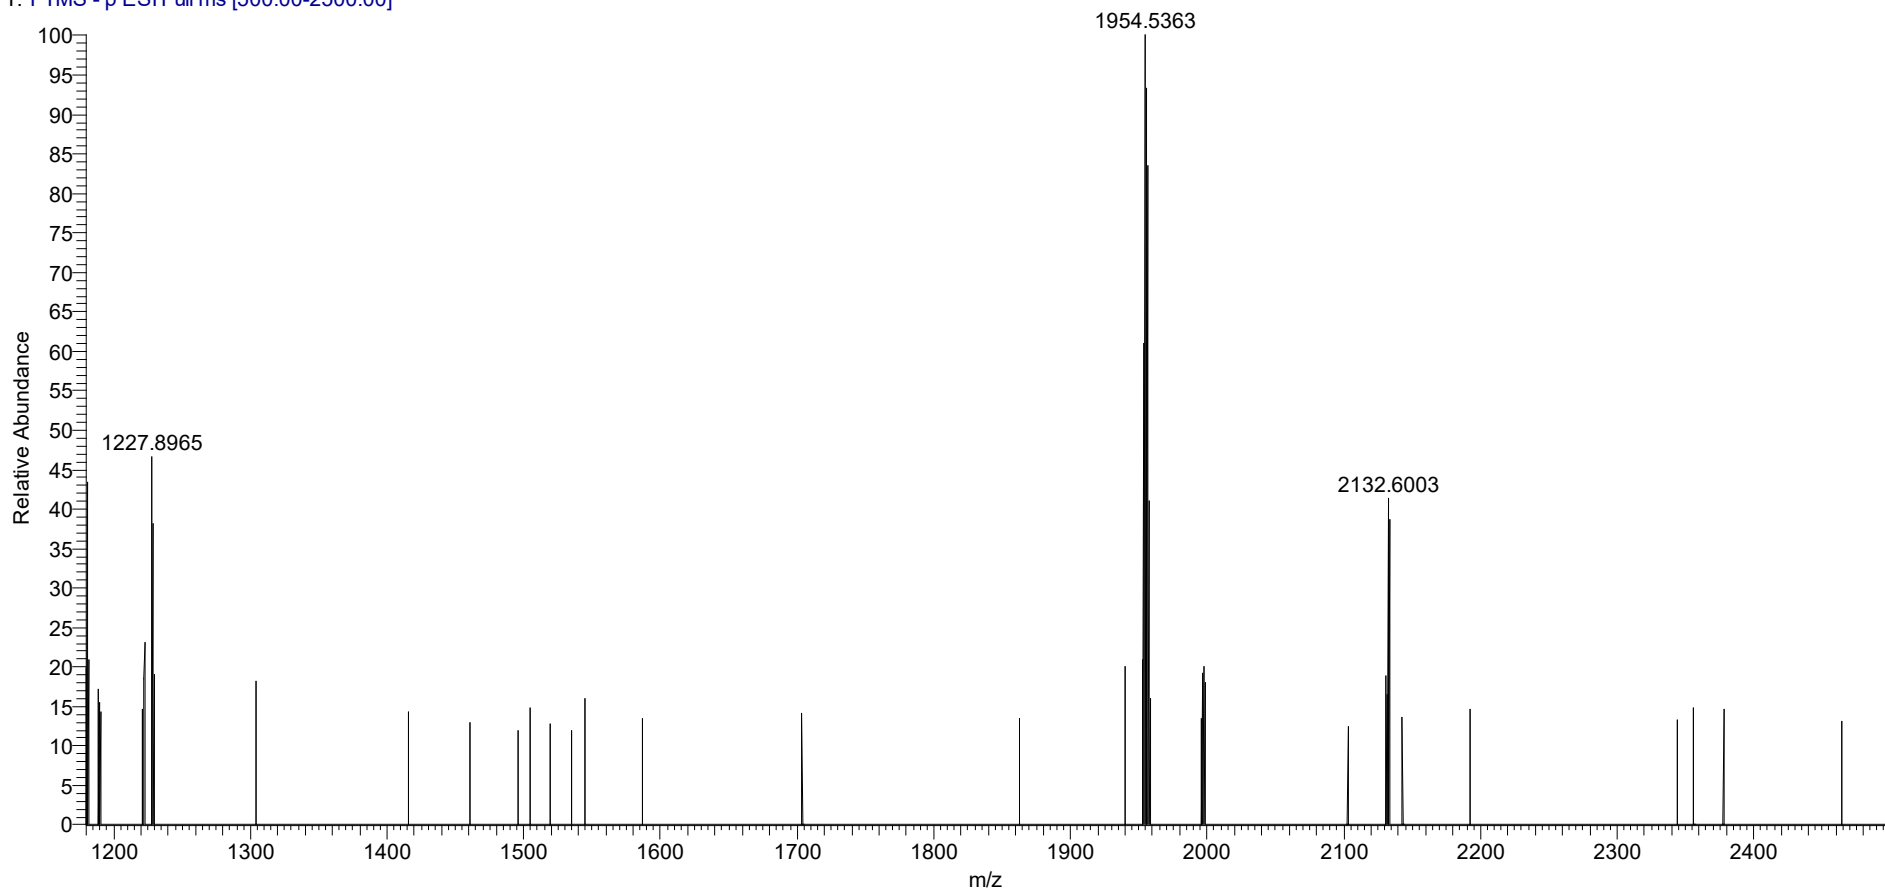



# Q Exactive High-Res Mass Spec

Nitro #1 RT: 0.01 AV: 1 NL: 3.75E5  
T: FTMS - p ESI Full ms [500.00-2500.00]

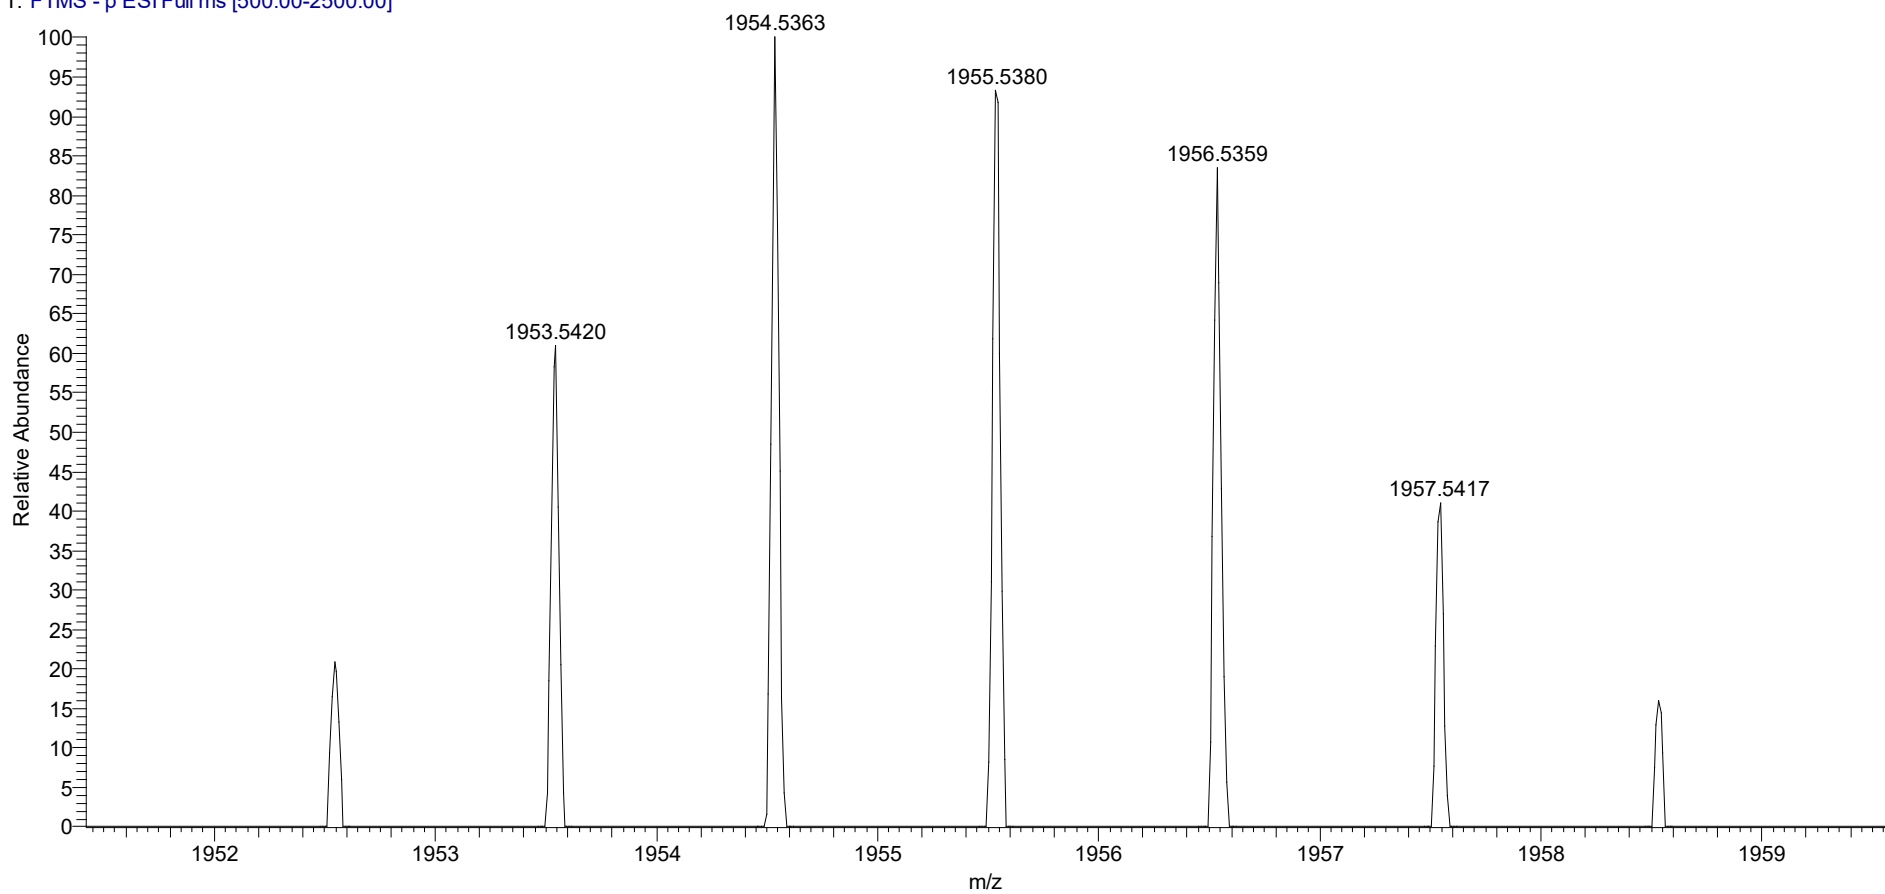

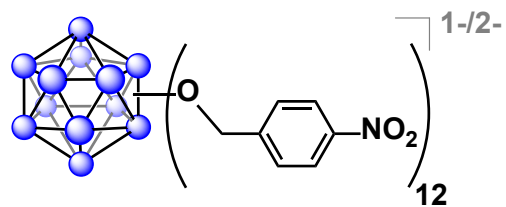

IR

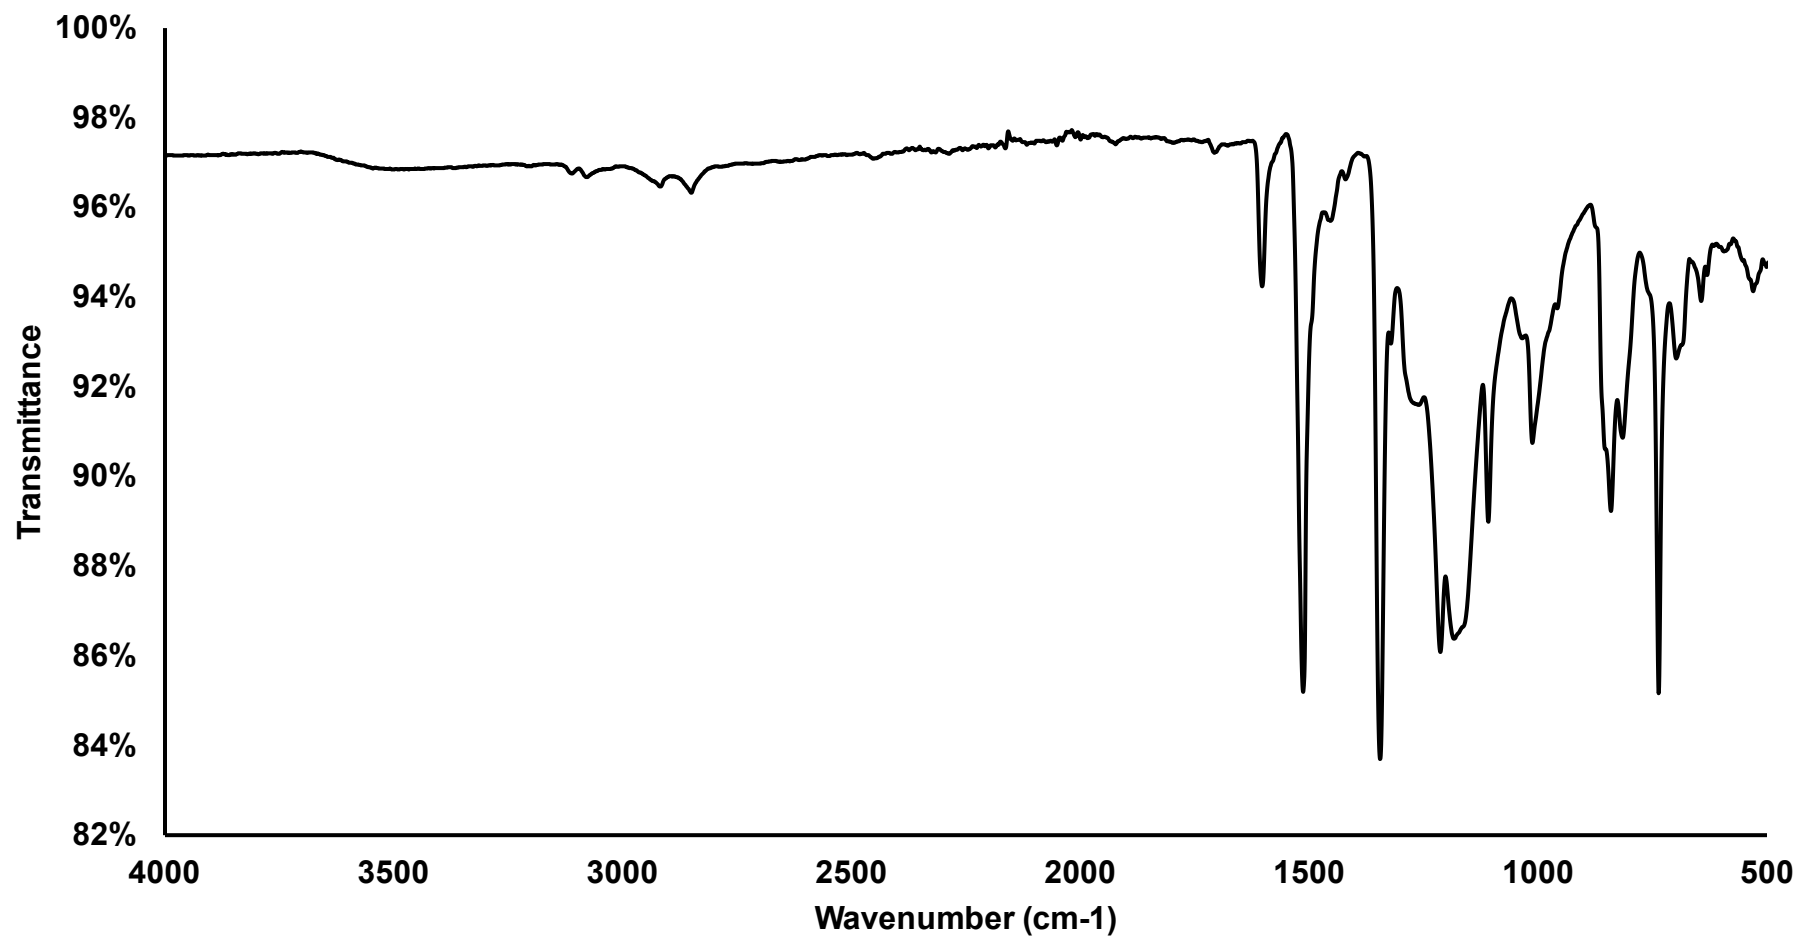

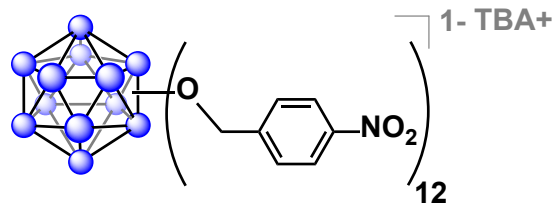

# EPR

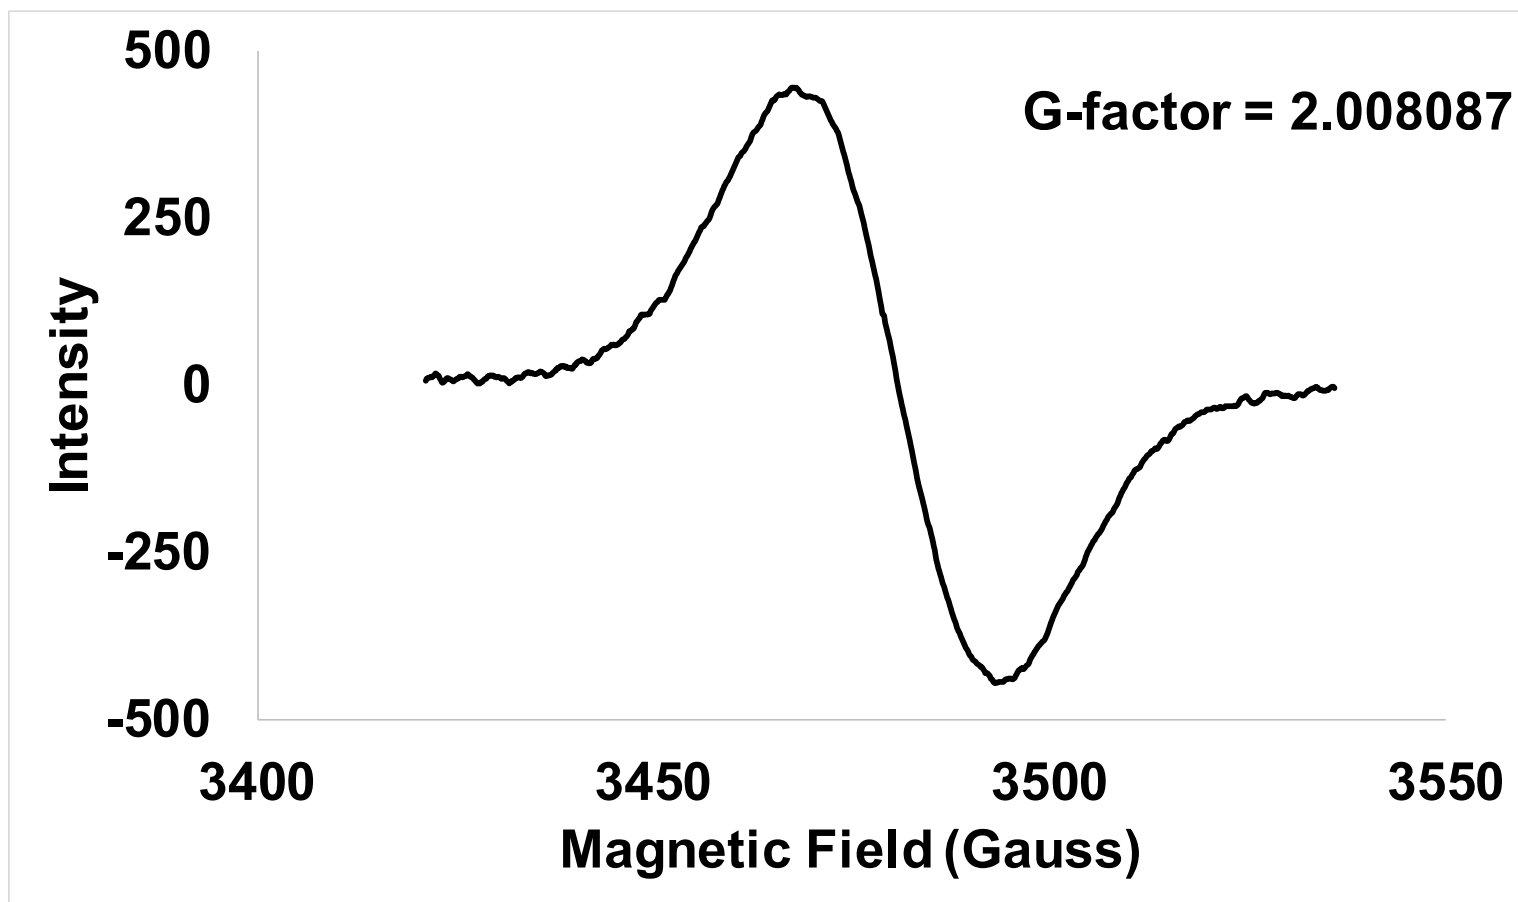

DOS Format  
 ANZ 1024  
 MIN -445.813477  
 MAX 444.186523  
 JSS 0  
 GST 3421.28  
 GSI 114.54  
 JUN G  
 JON Bruker BioSpin GmbH  
 JDA 9/29/2015  
 JTM 16:26  
 JRE c:\programfiles\bruker-  
 emx\syscal\st0103.cal  
 JEX field-sweep  
 JSD 1  
 HCF 3478.55  
 HSW 114.54  
 EMF 0  
 RCT 20.48  
 RTC 163.84  
 RRG 8.93E+03  
 RMA 4  
 MF 9.776609  
 MP 6.38E-01  
 MPD 25

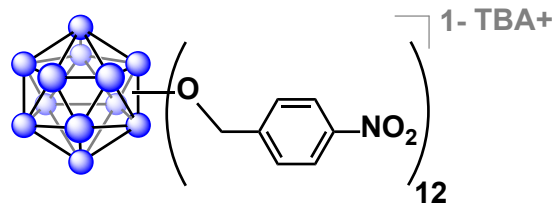

### B 1s XPS

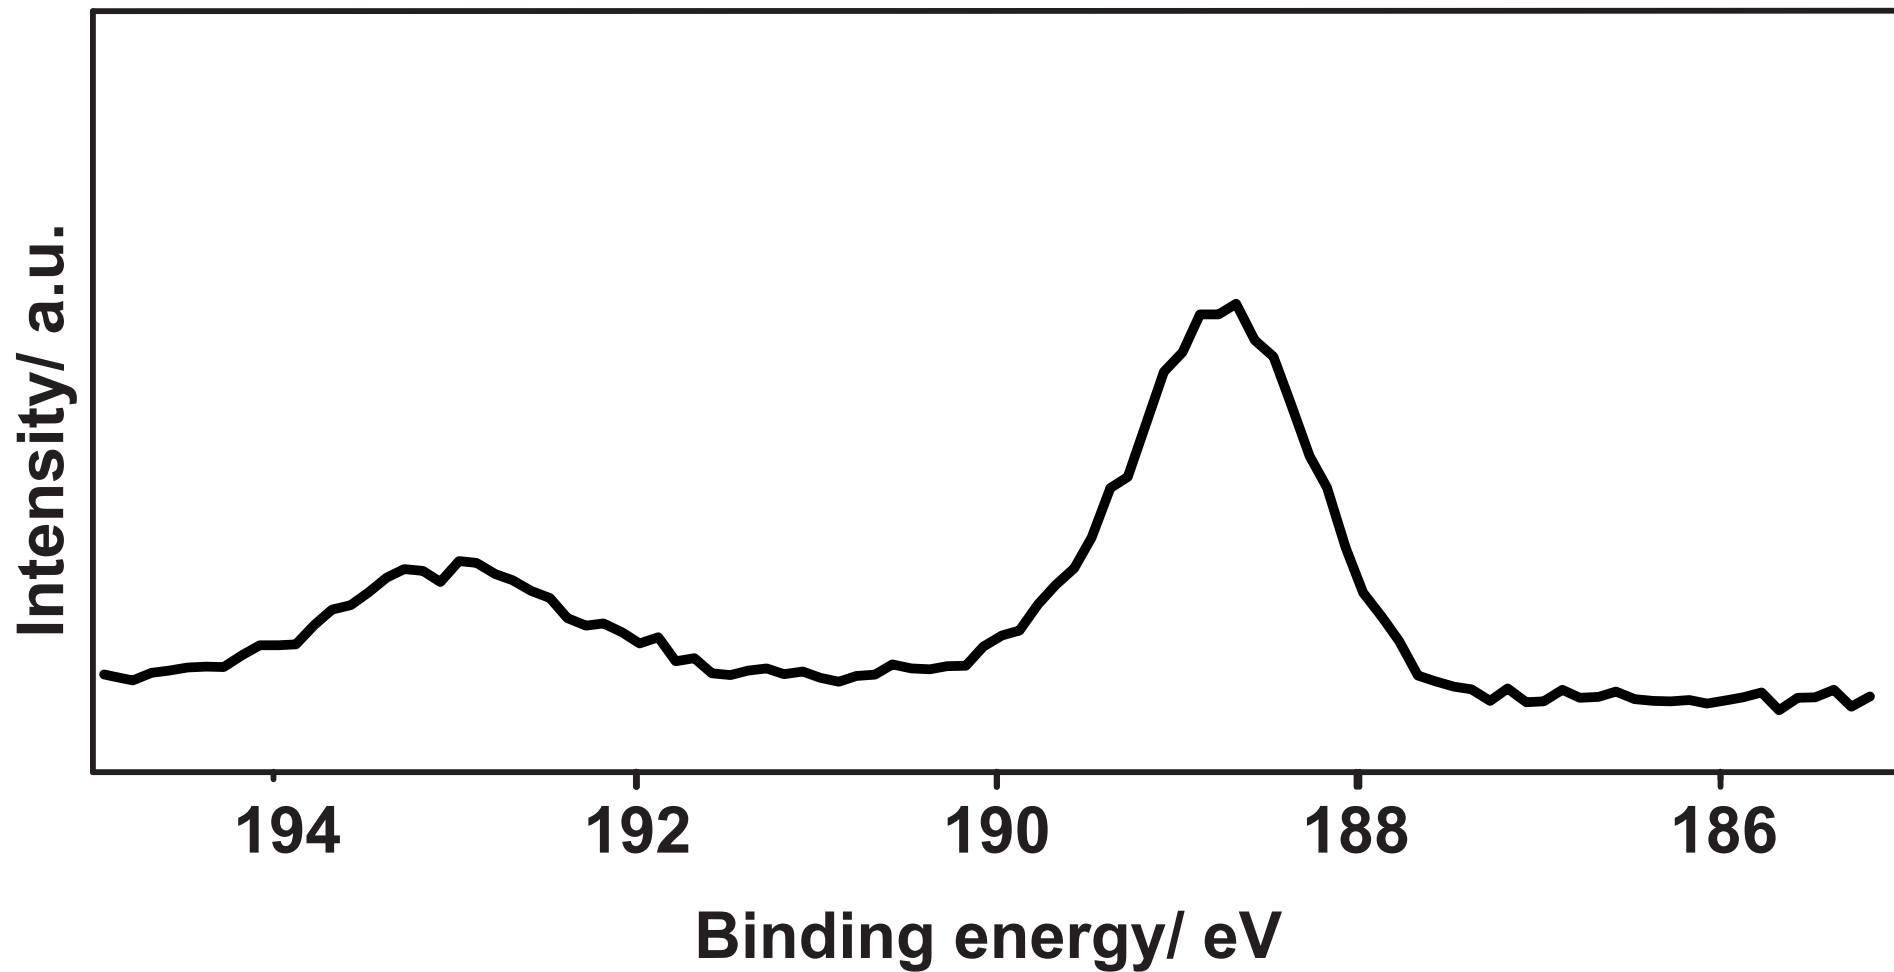



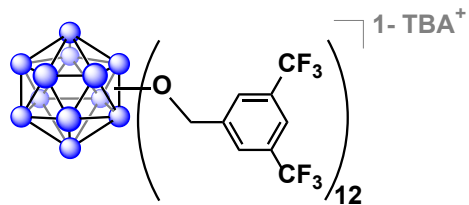

# <sup>11</sup>B {<sup>1</sup>H} NMR



Current Data Parameters  
 NAME B12(O-3,5-bisTFMBn)12  
 EXPNO 210  
 PROCNO 1

F2 - Acquisition Parameters  
 Date\_ 20150824  
 Time 20.51  
 INSTRUM av400  
 PROBHD 5 mm PABBO BB/  
 PULPROG zgdc.js  
 TD 5096  
 SOLVENT CDCl3  
 NS 1024  
 DS 0  
 SWH 51020.406 Hz  
 FIDRES 10.011854 Hz  
 AQ 0.0499408 sec  
 RG 189.85  
 DW 9.800 usec  
 DE 6.50 usec  
 TE 299.2 K  
 D1 0.00000400 sec  
 D11 0.03000000 sec  
 TD0 1

===== CHANNEL f1 =====  
 SFO1 128.3776052 MHz  
 NUC1 11B  
 P1 10.00 usec  
 PLW1 52.00000000 W

===== CHANNEL f2 =====  
 SFO2 400.1324008 MHz  
 NUC2 1H  
 CPDPRG[2] waltz16  
 PCPD2 90.00 usec  
 PLW2 13.00000000 W  
 PLW12 0.36111000 W

F2 - Processing parameters  
 SI 32768  
 SF 128.3776050 MHz  
 WDW EM  
 SSB 0  
 LB 50.00 Hz  
 GB 0  
 PC 1.40

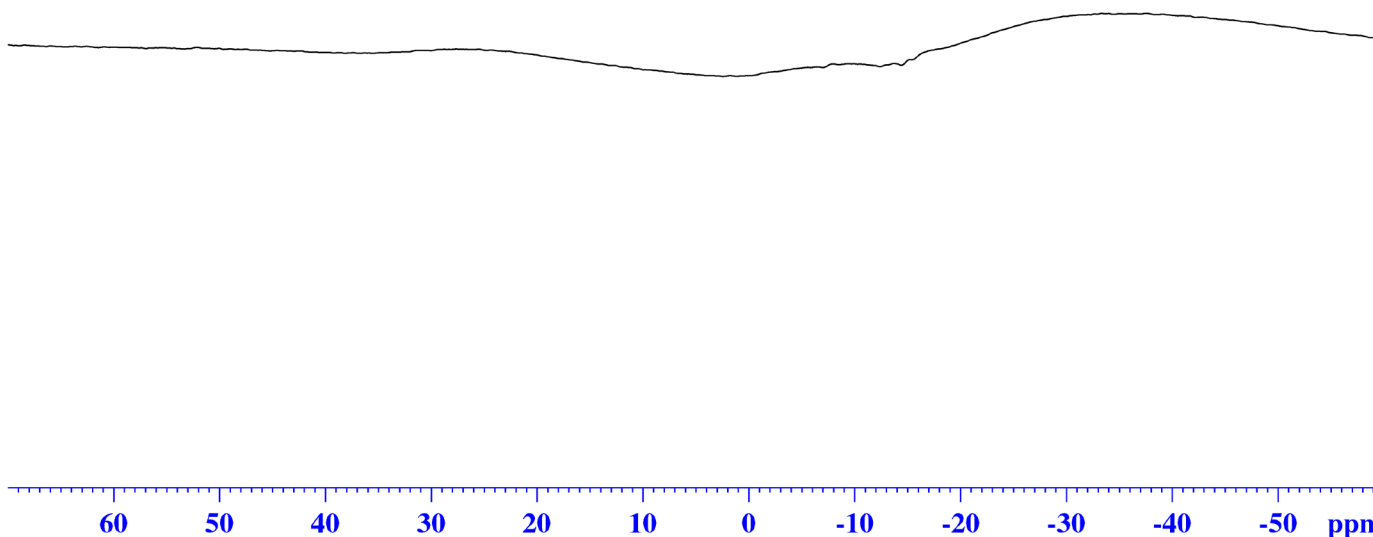

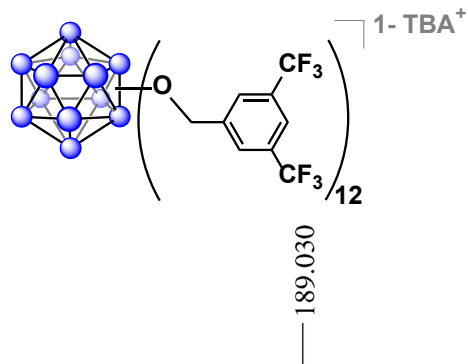

# <sup>13</sup>C NMR



132.703  
132.488  
129.392  
124.631  
122.473  
121.043

67.990  
59.174  
59.152  
59.130

30.943  
25.615  
23.829  
19.671  
19.661  
13.398

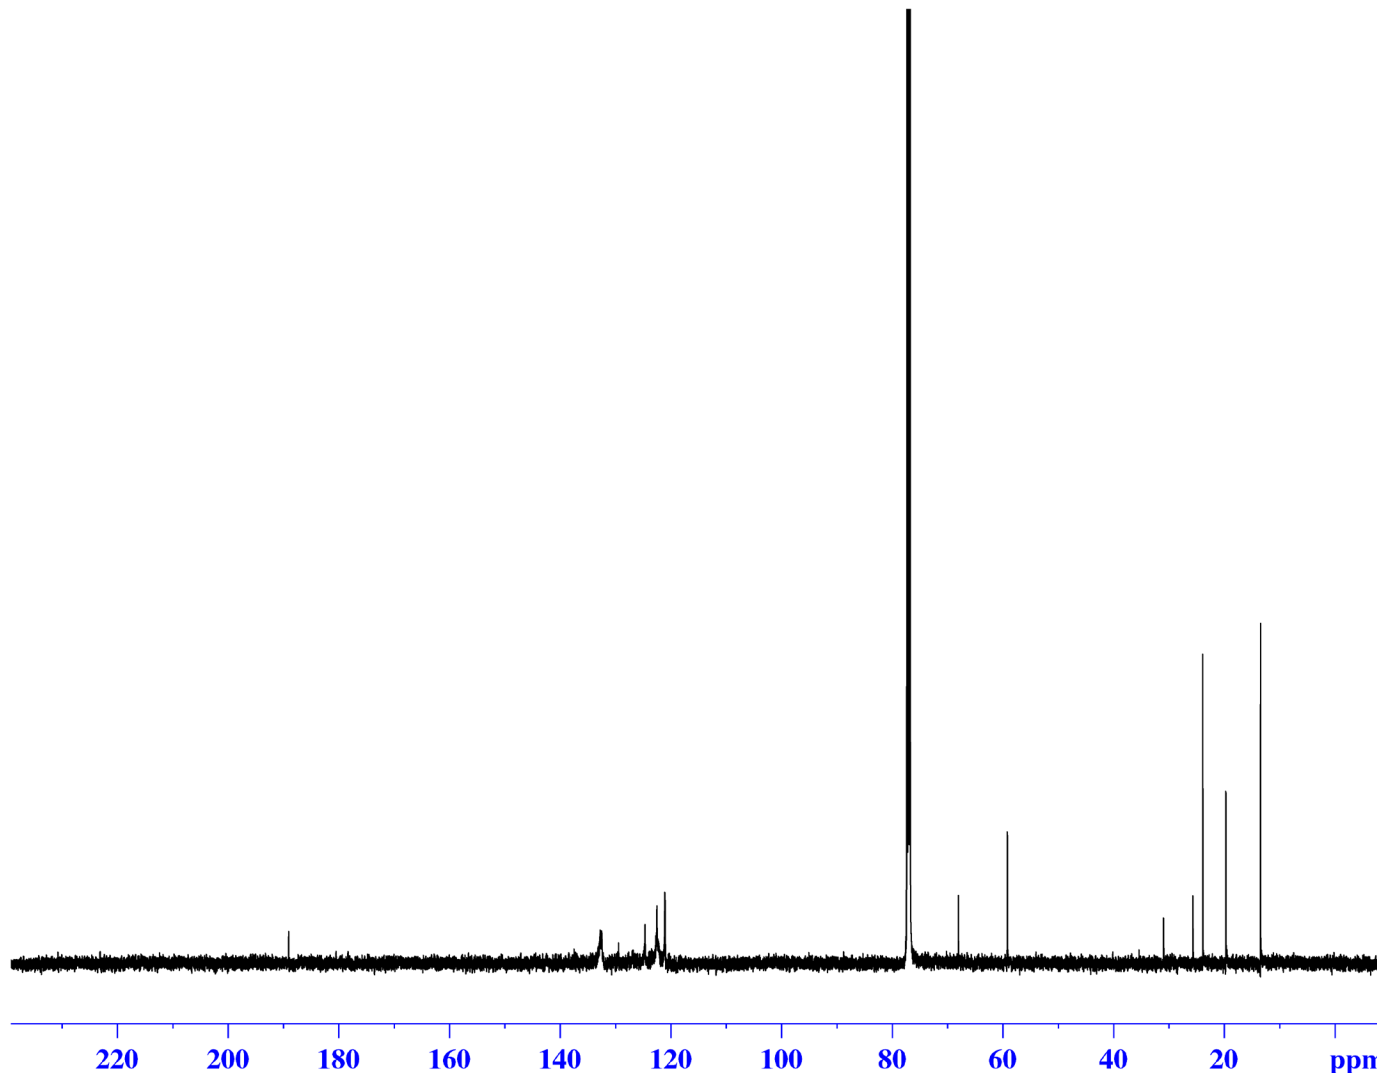

Current Data Parameters  
NAME B12(O-3,5-bisTFMBn)12  
EXPNO 300  
PROCNO 1

F2 - Acquisition Parameters  
Date\_ 20150829  
Time 21.11  
INSTRUM av500  
PROBHD 5 mm DCH 13C-1  
PULPROG zgpg30  
TD 65536  
SOLVENT CDCl3  
NS 256  
DS 2  
SWH 31250.000 Hz  
FIDRES 0.476837 Hz  
AQ 1.0485760 sec  
RG 204.54  
DW 16.000 usec  
DE 18.00 usec  
TE 298.0 K  
D1 2.00000000 sec  
D11 0.03000000 sec  
TD0 1

===== CHANNEL f1 =====  
SFO1 125.7722511 MHz  
NUC1 13C  
P1 9.63 usec  
PLW1 23.00000000 W

===== CHANNEL f2 =====  
SFO2 500.1330008 MHz  
NUC2 1H  
CPDPRG[2] waltz16  
PCPD2 80.00 usec  
PLW2 13.50000000 W  
PLW12 0.21094000 W  
PLW13 0.13500001 W

F2 - Processing parameters  
SI 131072  
SF 125.7577890 MHz  
WDW EM  
SSB 0  
LB 1.00 Hz  
GB 0  
PC 1.40



# <sup>19</sup>F NMR

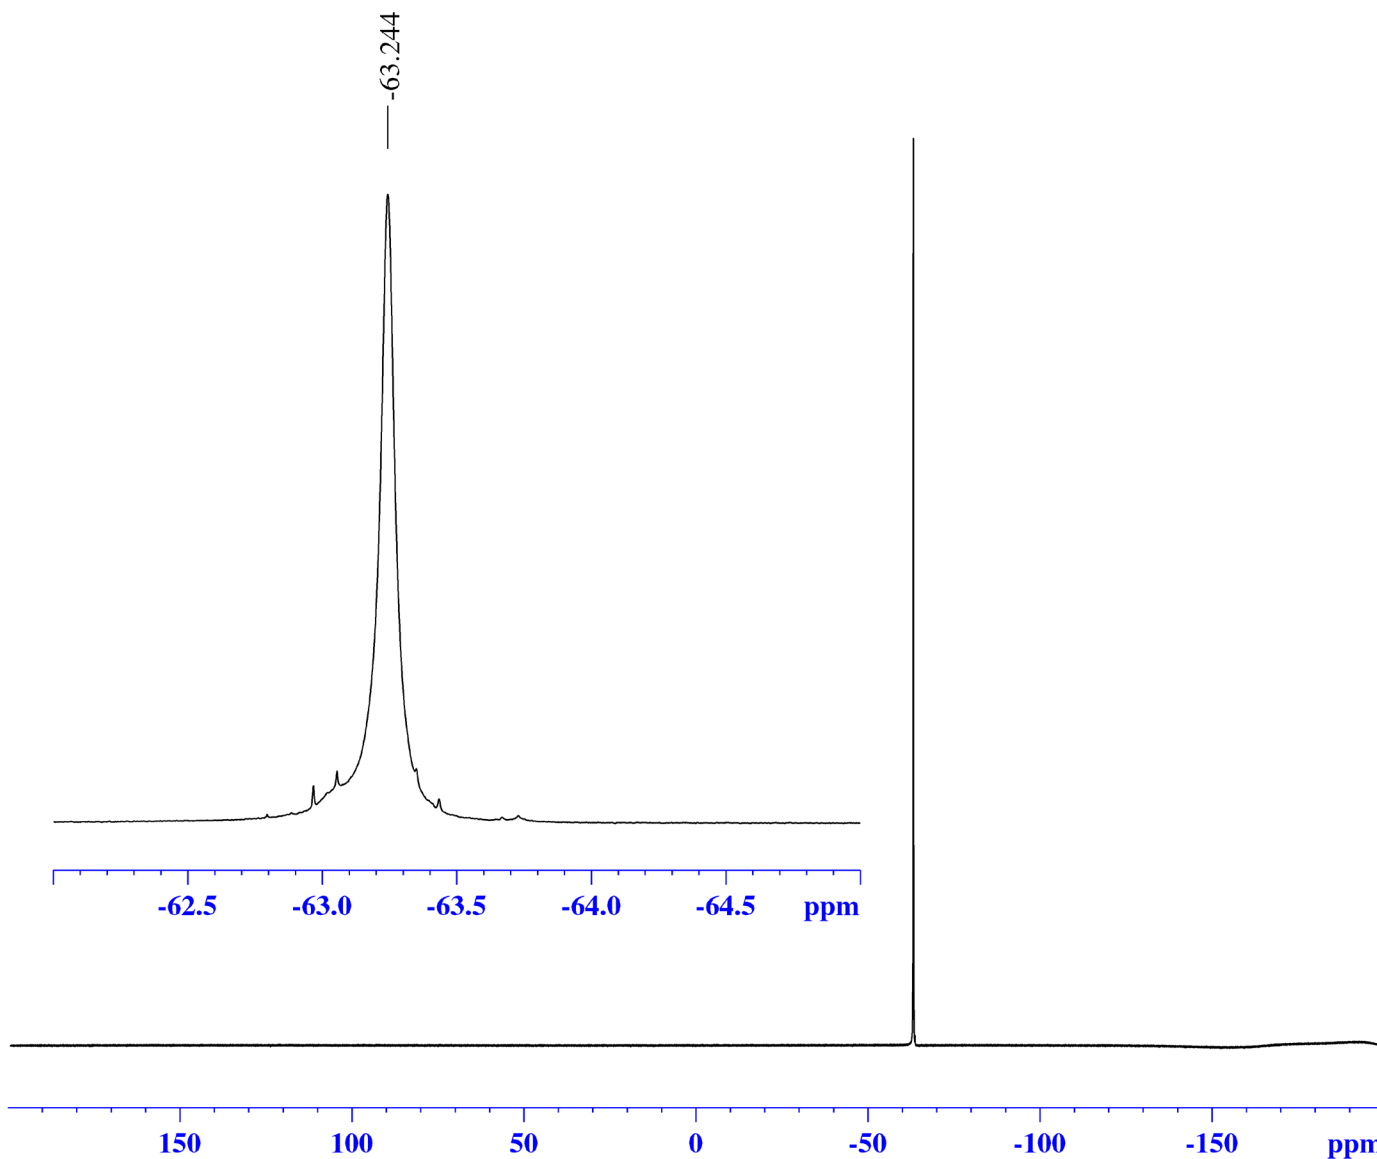

Current Data Parameters  
 NAME B12(O-3,5-bisTFMBn)12  
 EXPNO 212  
 PROCNO 1

F2 - Acquisition Parameters  
 Date\_ 20150824  
 Time 21.00  
 INSTRUM av400  
 PROBHD 5 mm PABBO BB/  
 PULPROG zgfgqn30  
 TD 262144  
 SOLVENT CDCl3  
 NS 64  
 DS 0  
 SWH 150000.000 Hz  
 FIDRES 0.572205 Hz  
 AQ 0.8738133 sec  
 RG 189.85  
 DW 3.333 usec  
 DE 6.50 usec  
 TE 299.0 K  
 D1 2.00000000 sec  
 TD0 1

===== CHANNEL f1 =====  
 SFO1 376.4983660 MHz  
 NUC1 19F  
 P1 14.50 usec  
 PLW1 17.00000000 W

F2 - Processing parameters  
 SI 262144  
 SF 376.4983660 MHz  
 WDW EM  
 SSB 0  
 LB 1.00 Hz  
 GB 0  
 PC 1.00

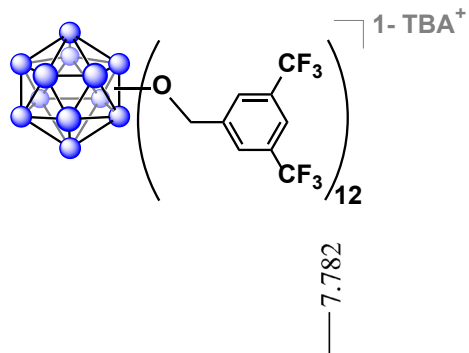

# <sup>1</sup>H NMR



3.148  
3.128  
3.107

1.653  
1.478  
1.461  
1.068  
1.050  
1.032

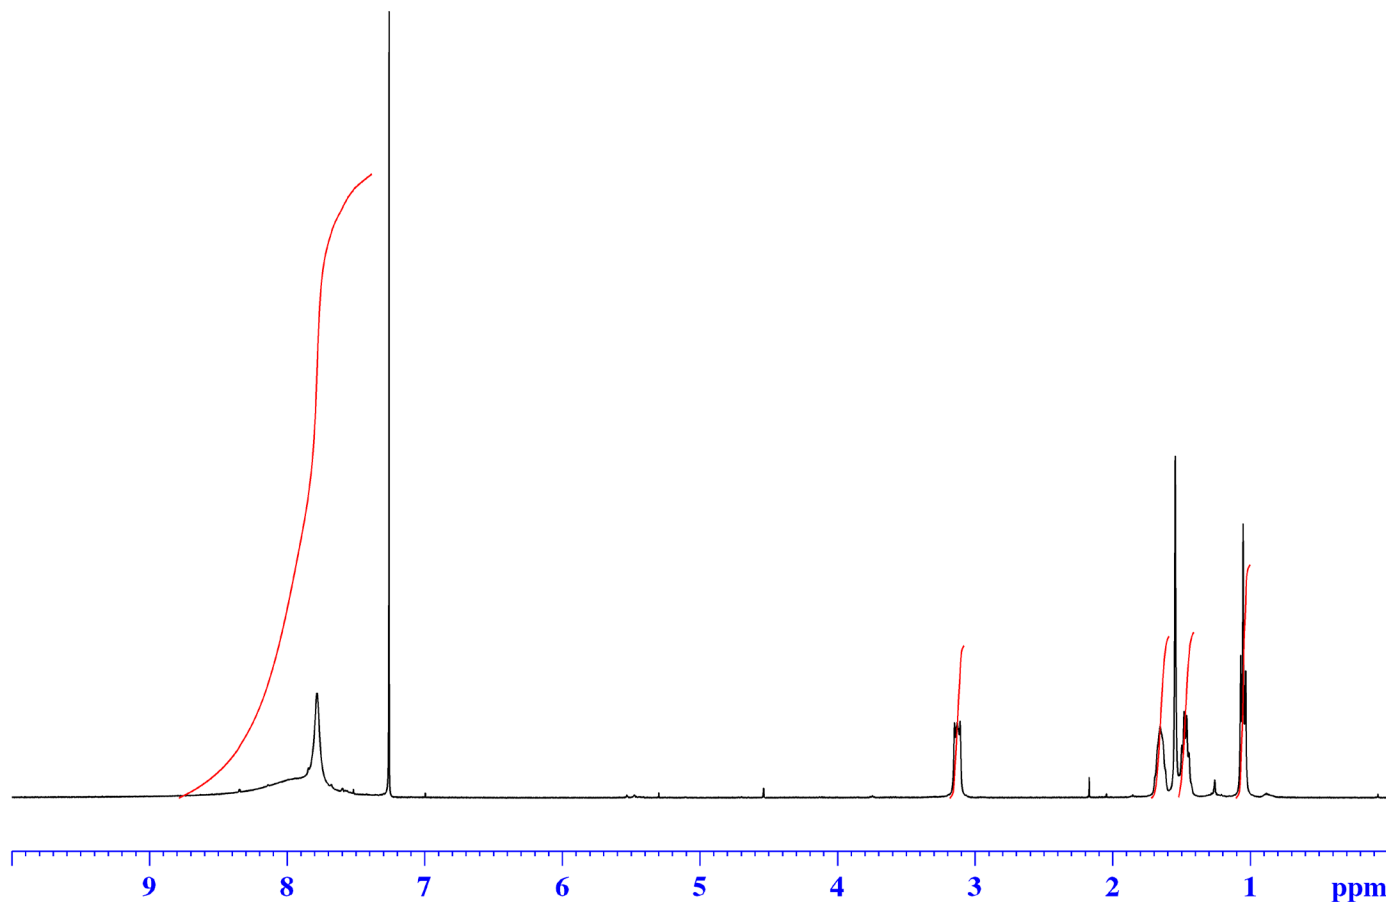

Current Data Parameters  
 NAME B12(O-3,5-bisTFMBn)12  
 EXPNO 211  
 PROCNO 1

F2 - Acquisition Parameters  
 Date\_ 20150824  
 Time 20.54  
 INSTRUM av400  
 PROBHD 5 mm PABBO BB/  
 PULPROG zg30  
 TD 52882  
 SOLVENT CDCl3  
 NS 32  
 DS 0  
 SWH 8012.820 Hz  
 FIDRES 0.151523 Hz  
 AQ 3.2998369 sec  
 RG 189.85  
 DW 62.400 usec  
 DE 6.50 usec  
 TE 299.0 K  
 D1 2.00000000 sec  
 TD0 1

===== CHANNEL f1 =====  
 SFO1 400.1324008 MHz  
 NUC1 1H  
 P1 15.00 usec  
 PLW1 13.00000000 W

F2 - Processing parameters  
 SI 65536  
 SF 400.1300184 MHz  
 WDW EM  
 SSB 0  
 LB 0.30 Hz  
 GB 0  
 PC 1.00

32.732

8.000

8.500

8.690

12.253

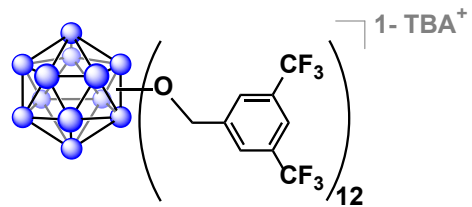

# Q Exactive High-Res Mass Spec

3-5-bis\_2#1 RT: 0.01 AV: 1 NL: 1.75E7  
T: FTMS - p ESI Full ms [500.00-4000.00]

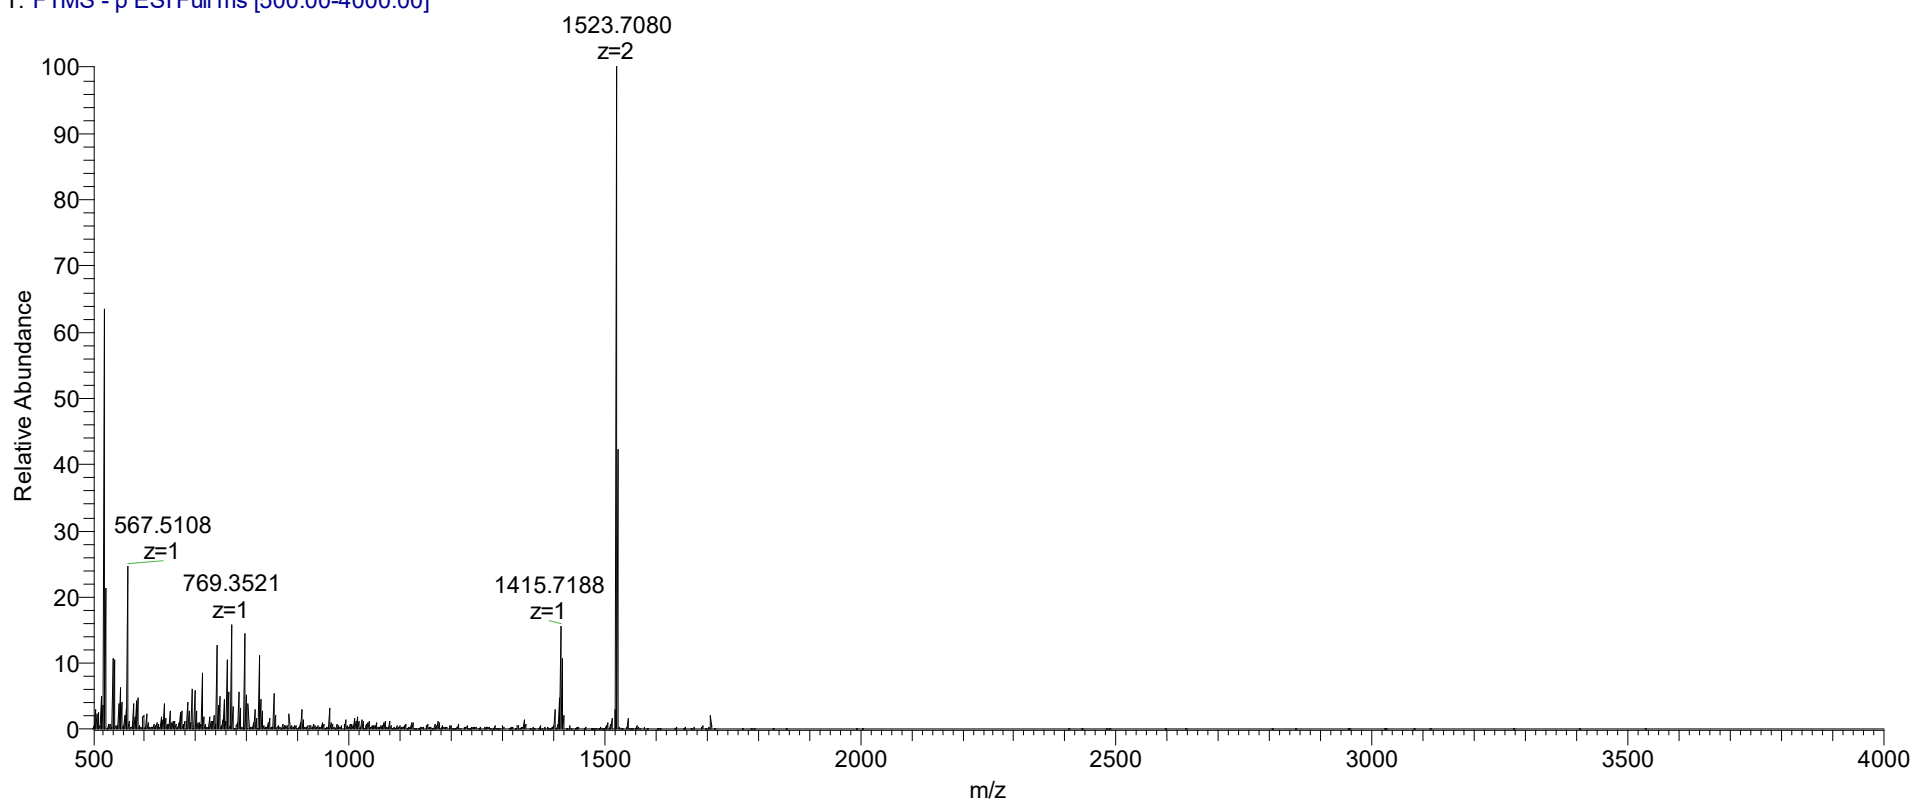

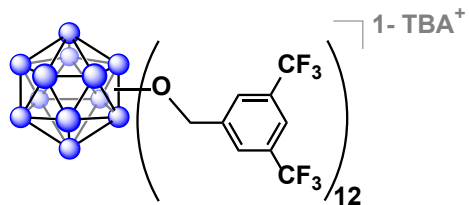

# Q Exactive High-Res Mass Spec

3-5-bis\_2#1 RT: 0.01 AV: 1 NL: 1.75E7  
T: FTMS - p ESI Full ms [500.00-4000.00]

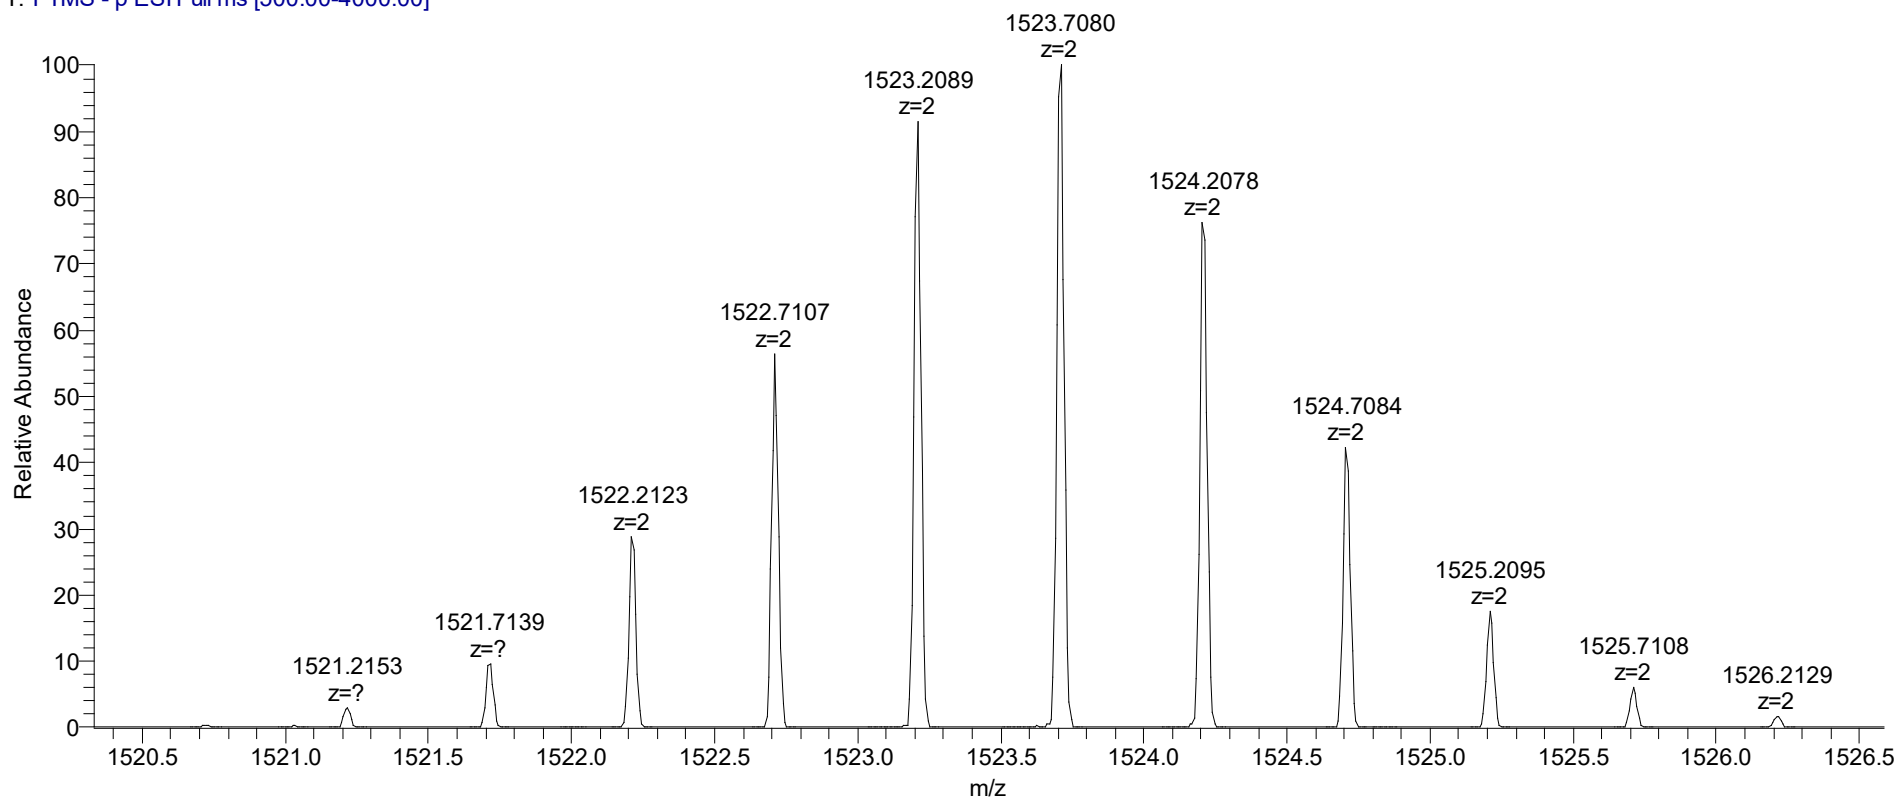

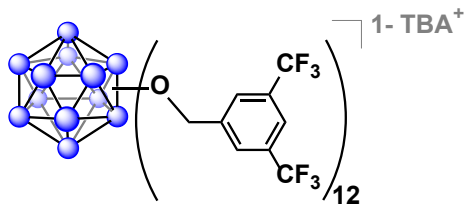

IR

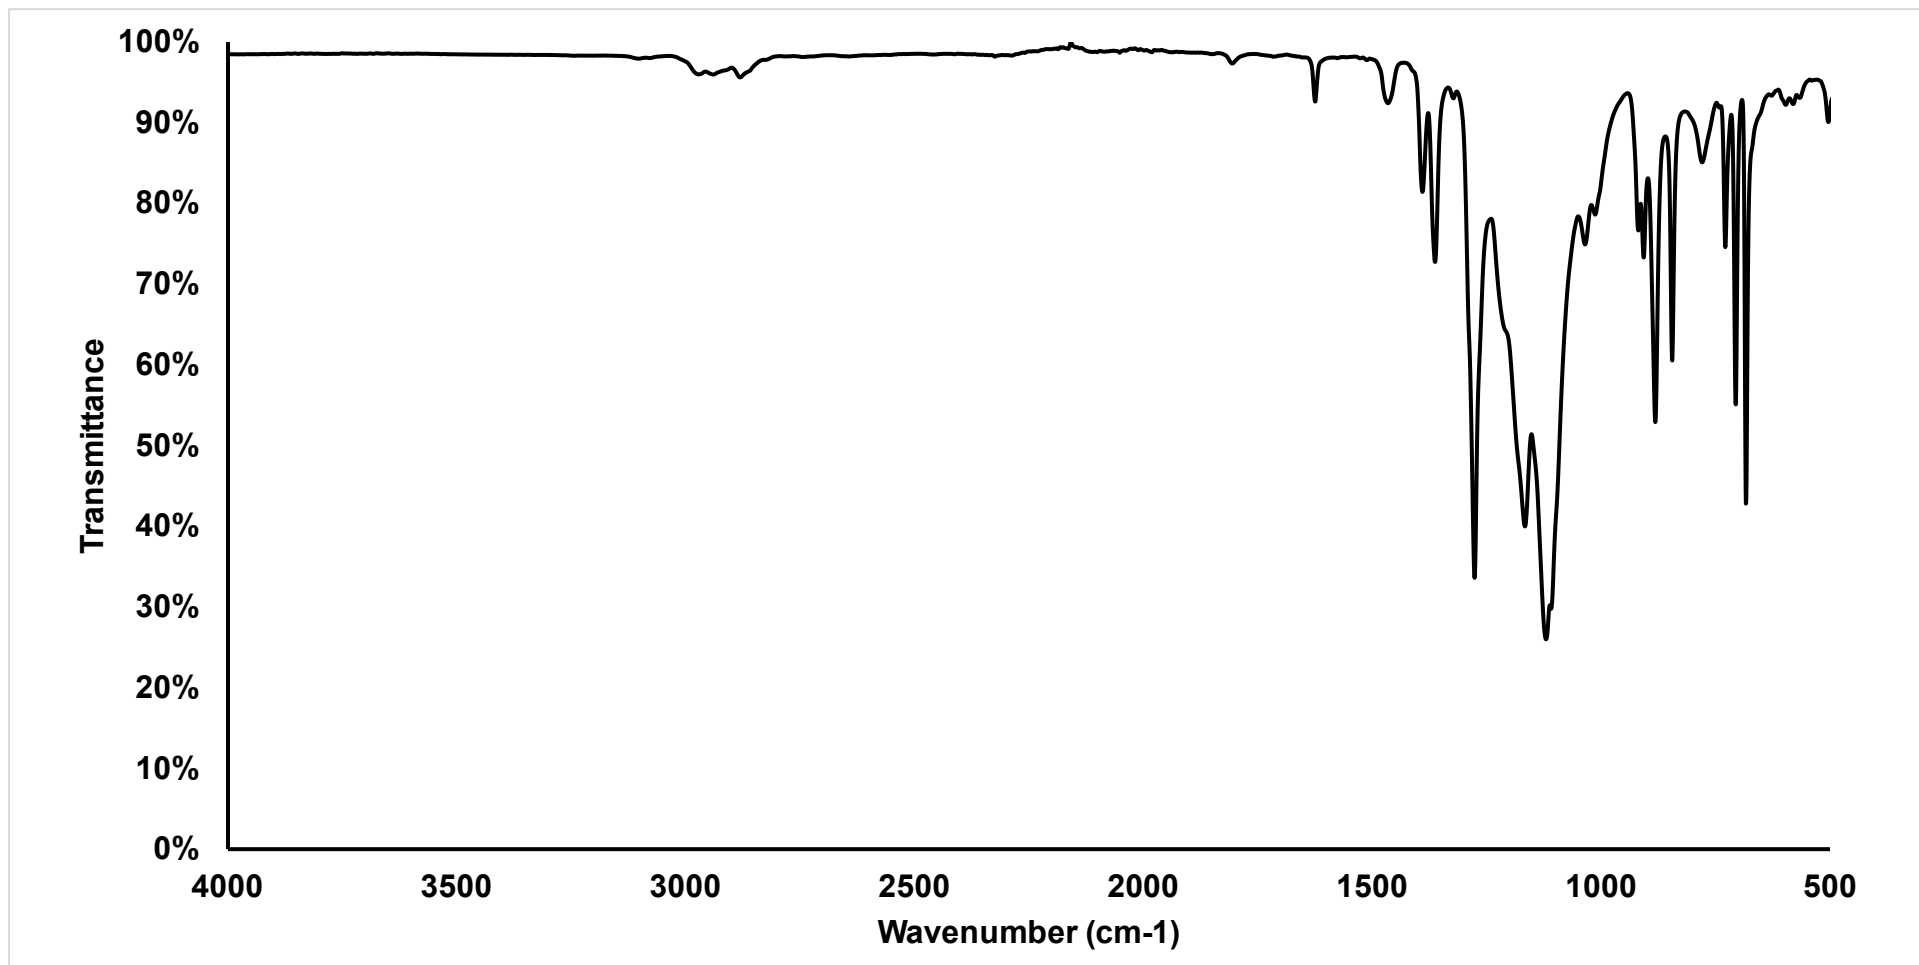

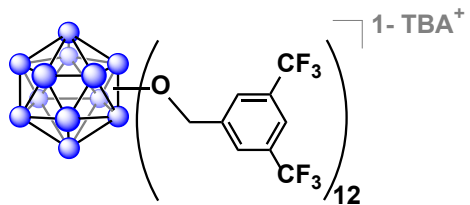

## EPR

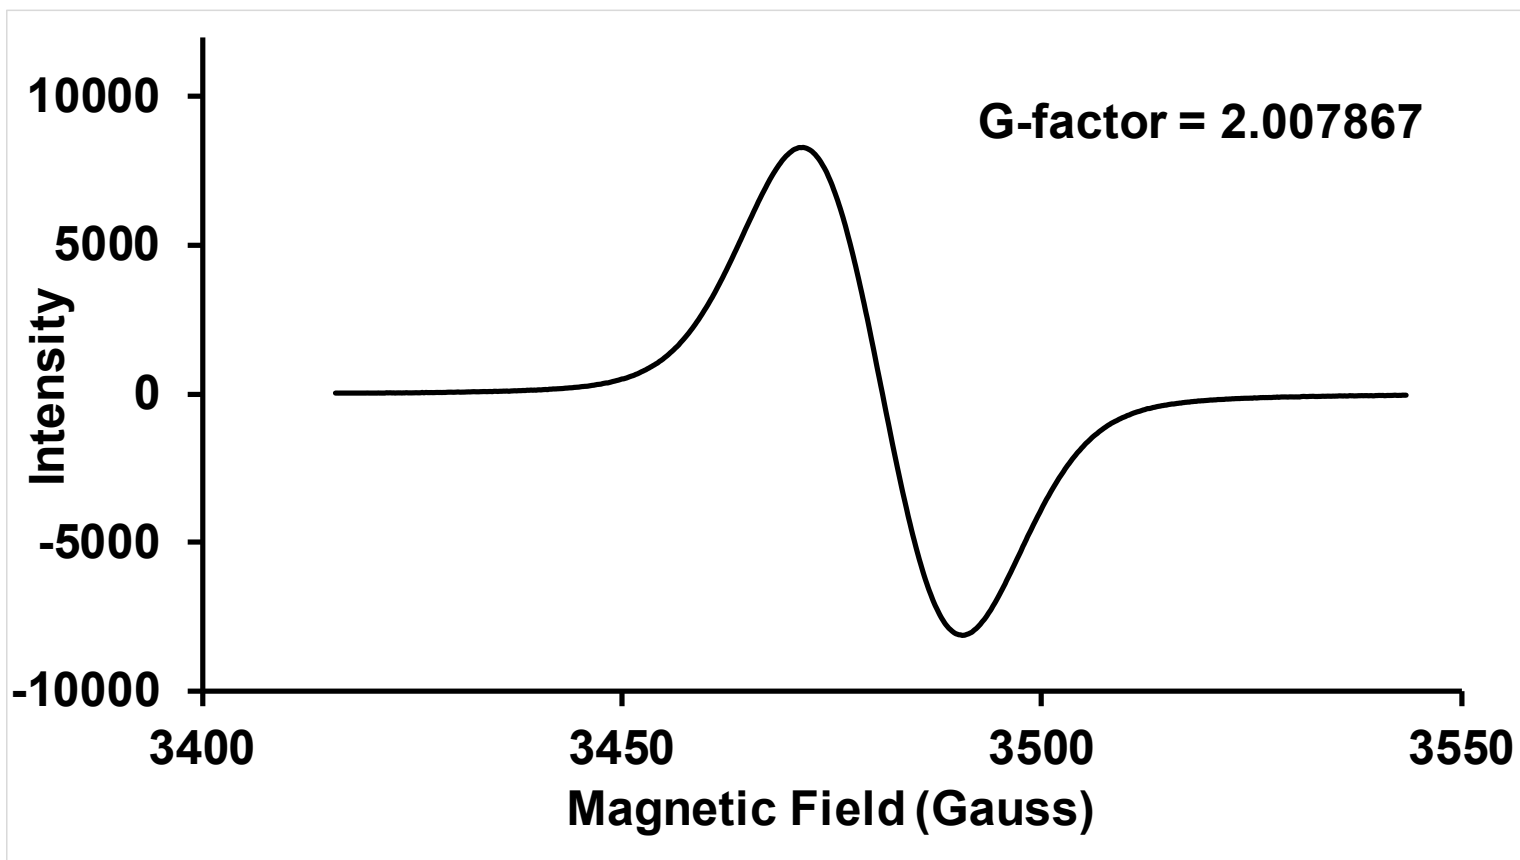

|     |                                              |
|-----|----------------------------------------------|
| DOS | Format                                       |
| ANZ | 1024                                         |
| MIN | -8134.161133                                 |
| MAX | 8283.838867                                  |
| JSS | 0                                            |
| GST | 3415.875                                     |
| GSI | 127.47                                       |
| JUN | G                                            |
| JON | Bruker BioSpin GmbH                          |
| JDA | 6/4/2015                                     |
| JTM | 16:02                                        |
| JRE | c:\programfiles\bruker-emx\syscal\st0103.cal |
| JEX | field-sweep                                  |
| JSD | 1                                            |
| HCF | 3479.61                                      |
| HSW | 127.47                                       |
| EMF | 0                                            |
| RCT | 20.48                                        |
| RTC | 20.48                                        |
| RRG | 2.83E+03                                     |
| RMA | 4                                            |
| MF  | 9.778519                                     |
| MP  | 6.38E-01                                     |



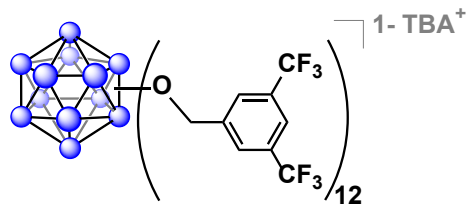

## B 1s XPS

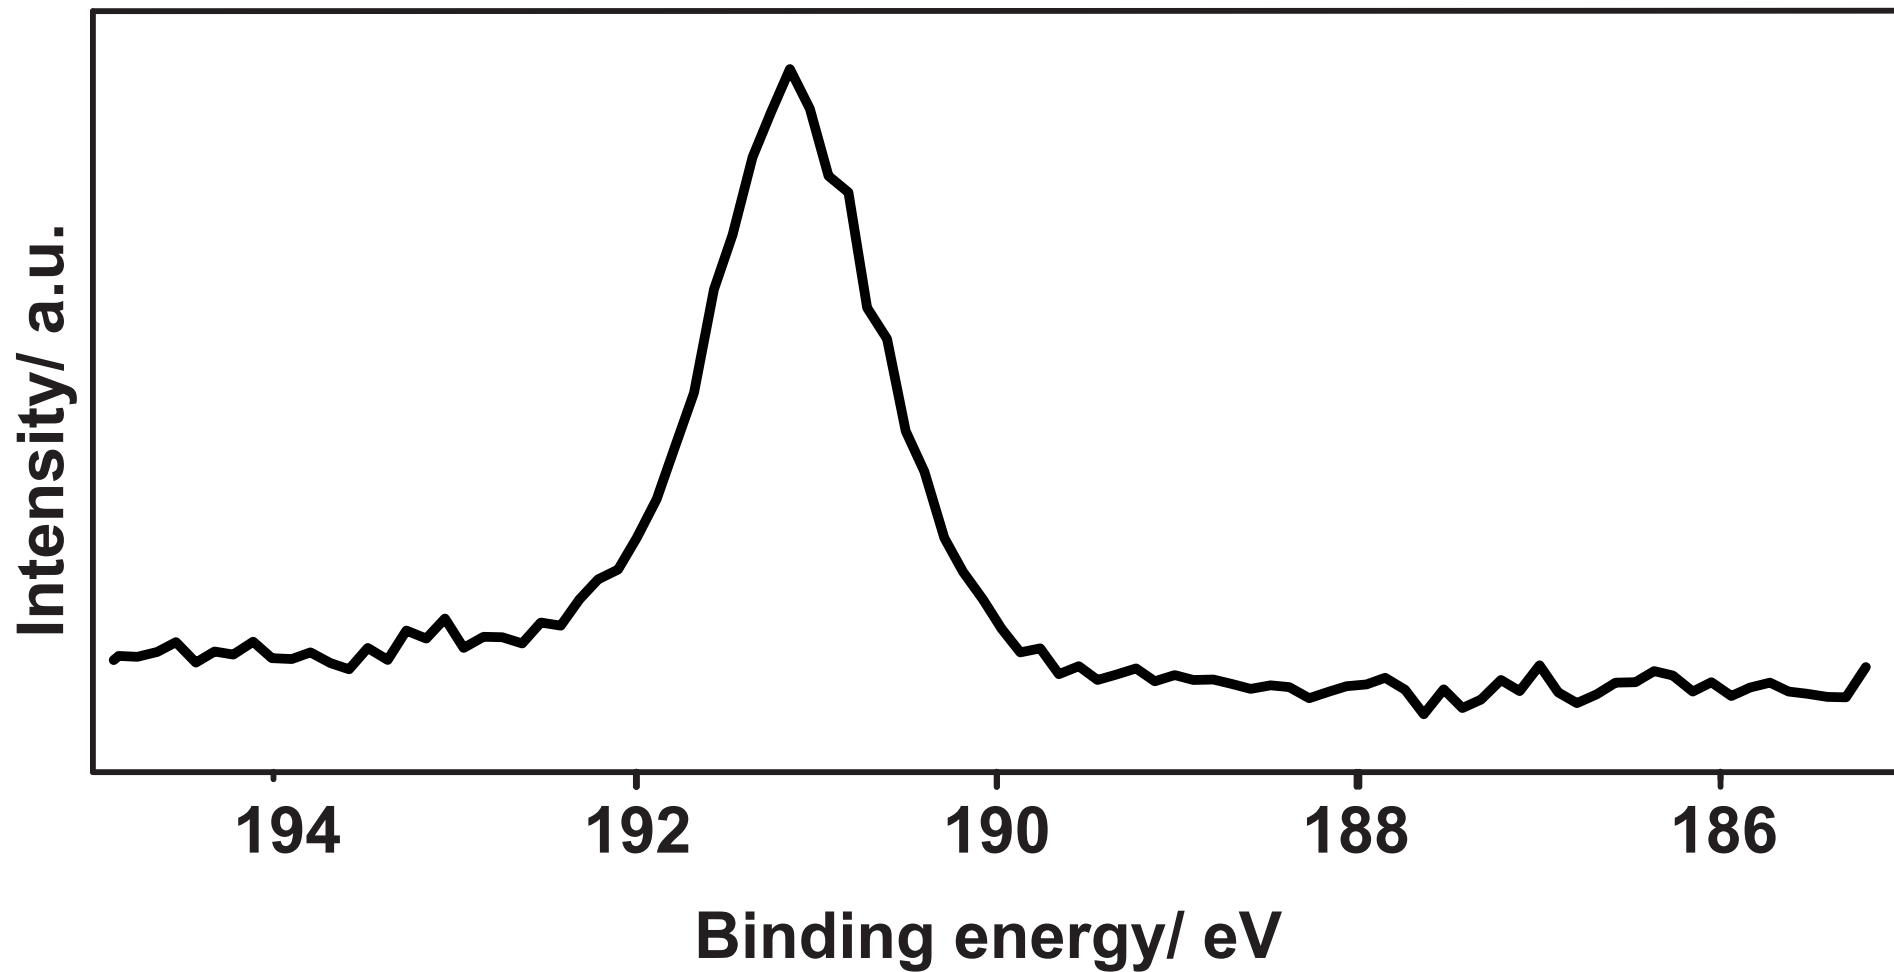

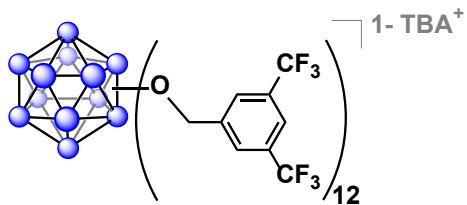

## Cyclic voltammetry

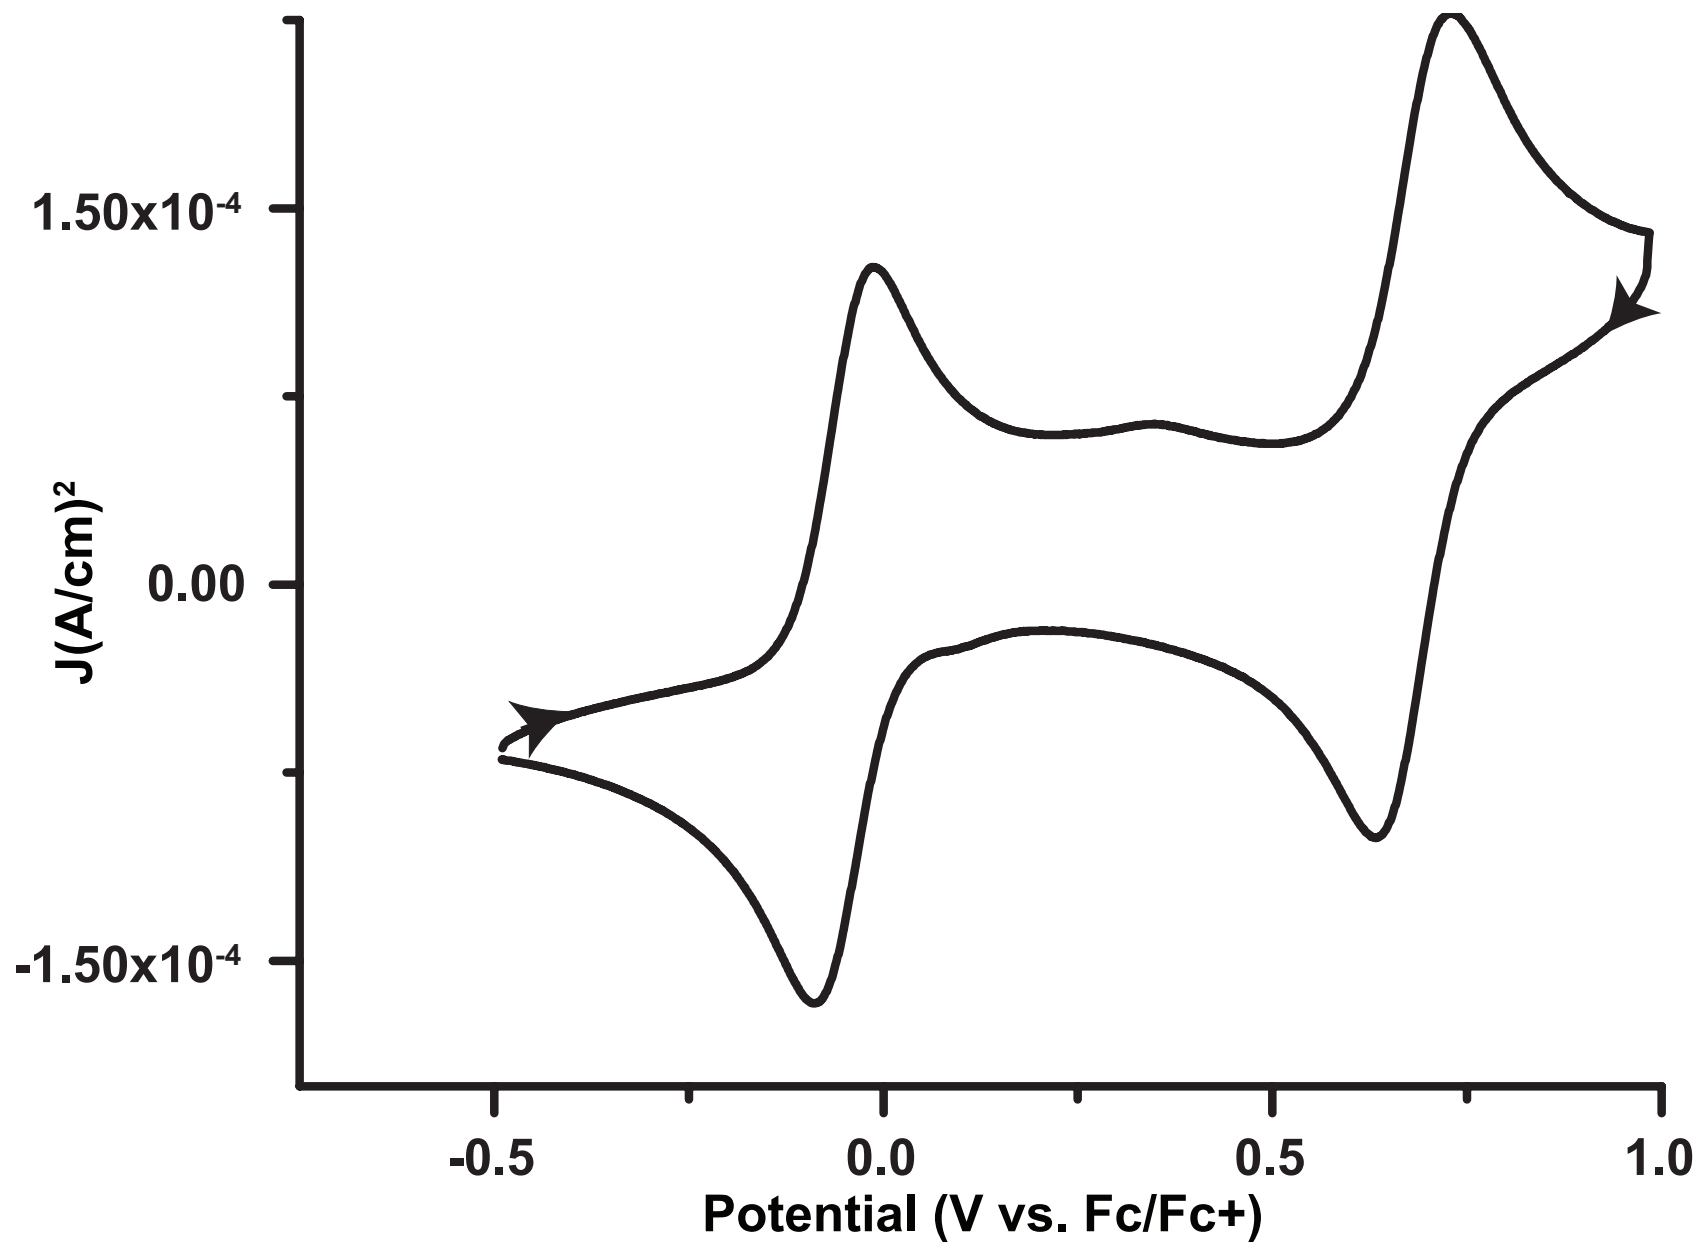

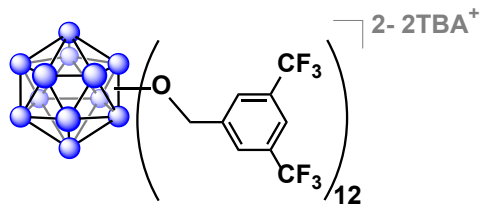

# <sup>13</sup>C NMR

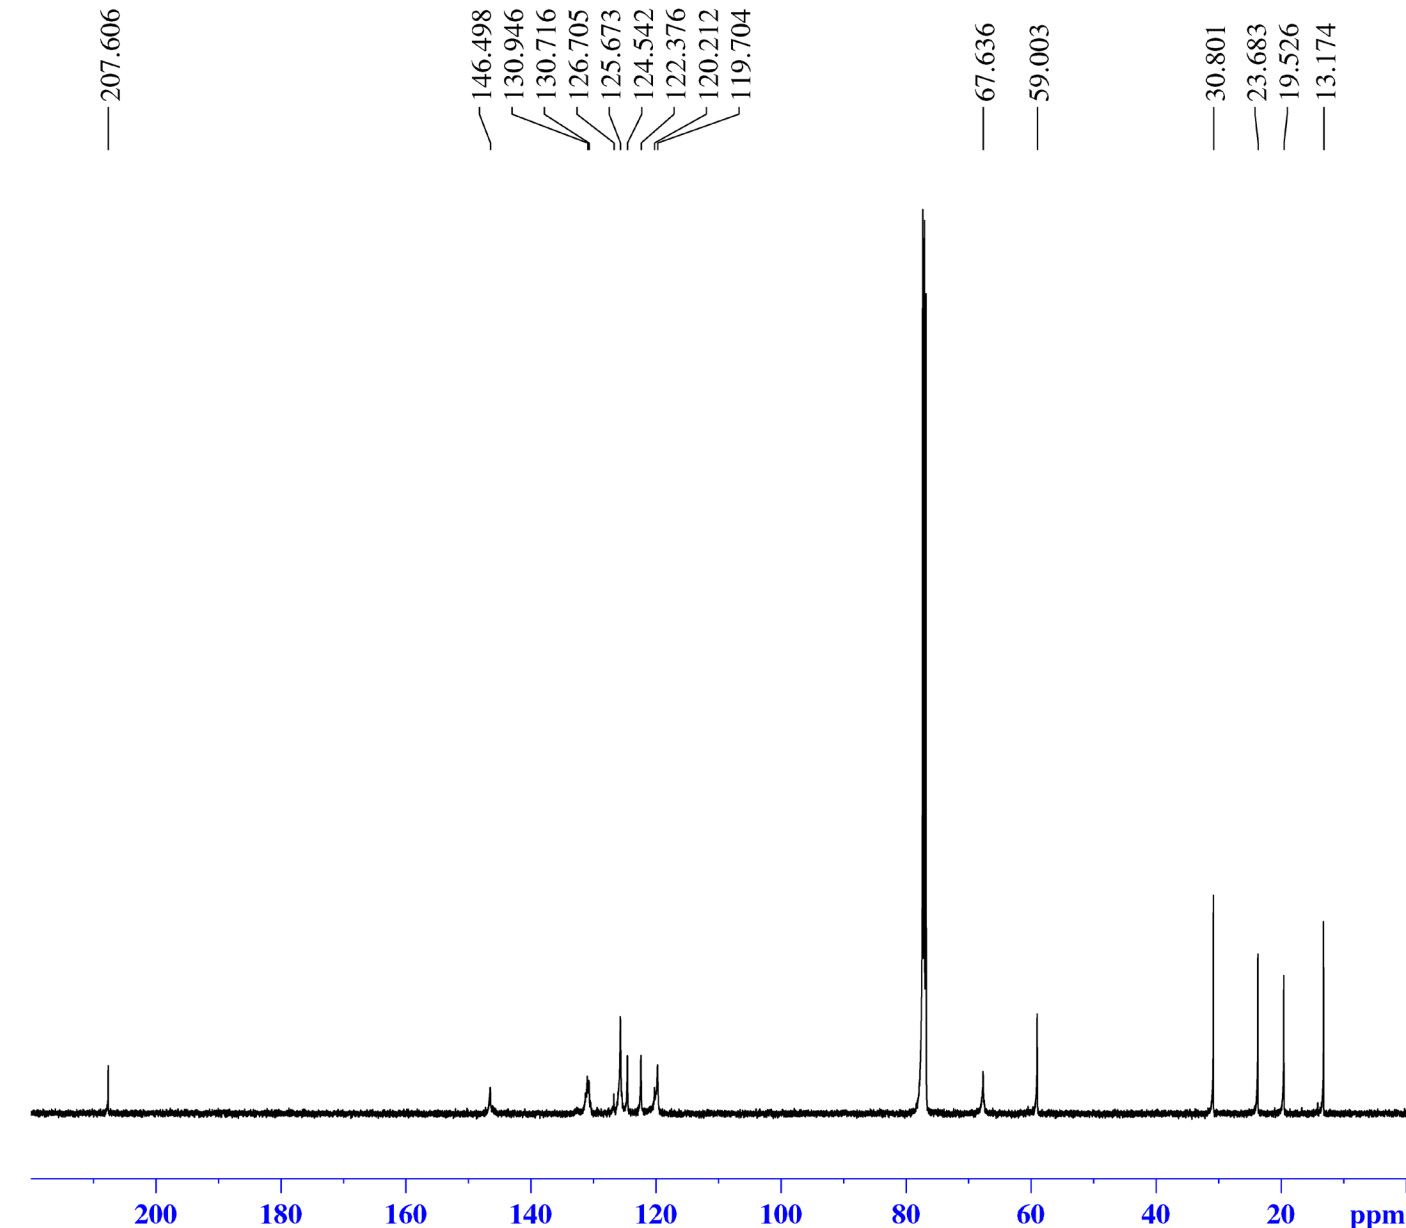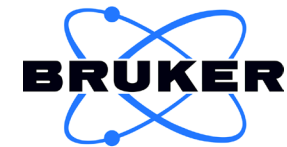

Current Data Parameters  
 NAME B12(O-3,5-bisTFMBn)12  
 EXPNO 700  
 PROCNO 1

F2 - Acquisition Parameters  
 Date\_ 20150829  
 Time 22.21  
 INSTRUM av500  
 PROBHD 5 mm DCH 13C-1  
 PULPROG zgpg30  
 TD 65536  
 SOLVENT CDCl3  
 NS 256  
 DS 2  
 SWH 31250.000 Hz  
 FIDRES 0.476837 Hz  
 AQ 1.0485760 sec  
 RG 204.54  
 DW 16.000 usec  
 DE 18.00 usec  
 TE 298.0 K  
 D1 2.00000000 sec  
 D11 0.03000000 sec  
 TD0 1

===== CHANNEL f1 =====  
 SFO1 125.7722511 MHz  
 NUC1 13C  
 P1 9.63 usec  
 PLW1 23.00000000 W

===== CHANNEL f2 =====  
 SFO2 500.1330008 MHz  
 NUC2 1H  
 CPDPRG[2] waltz16  
 PCPD2 80.00 usec  
 PLW2 13.50000000 W  
 PLW12 0.21094000 W  
 PLW13 0.13500001 W

F2 - Processing parameters  
 SI 131072  
 SF 125.7577890 MHz  
 WDW EM  
 SSB 0  
 LB 1.00 Hz  
 GB 0  
 PC 1.40

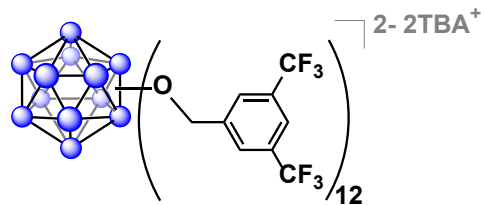

# <sup>19</sup>F NMR

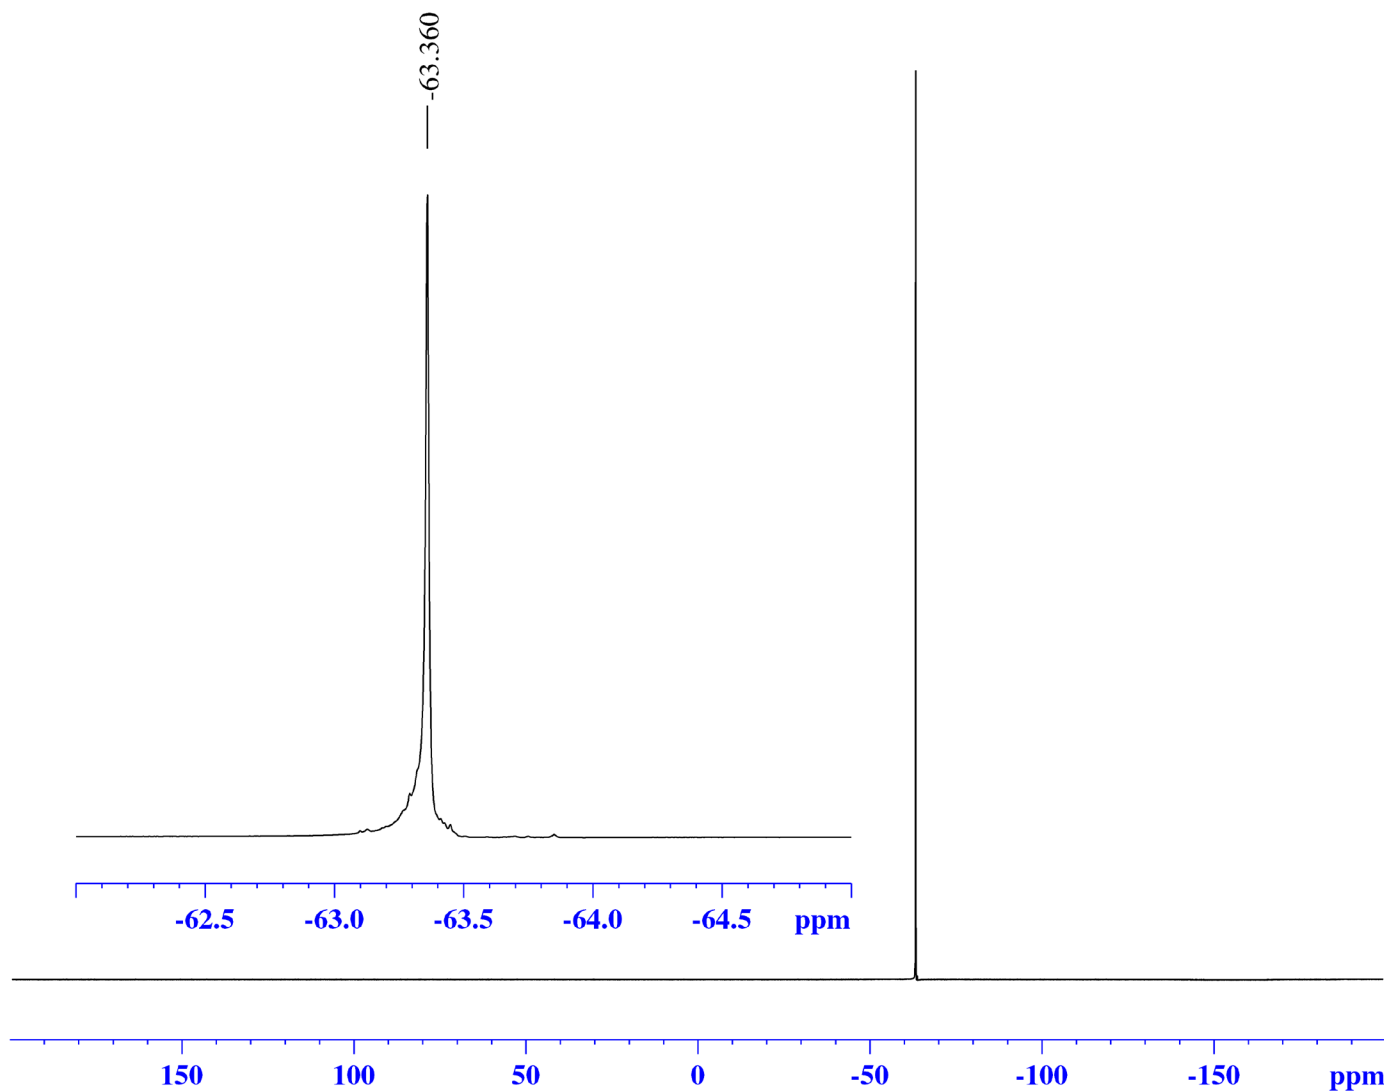

Current Data Parameters  
 NAME B12(O-3,5-bisTFMBn)12  
 EXPNO 121  
 PROCNO 1

F2 - Acquisition Parameters  
 Date\_ 20150824  
 Time 17.26  
 INSTRUM av400  
 PROBHD 5 mm PABBO BB/  
 PULPROG zgfgqn30  
 TD 262144  
 SOLVENT CDCl3  
 NS 32  
 DS 0  
 SWH 150000.000 Hz  
 FIDRES 0.572205 Hz  
 AQ 0.8738133 sec  
 RG 189.85  
 DW 3.333 usec  
 DE 6.50 usec  
 TE 299.0 K  
 D1 2.00000000 sec  
 TD0 1

===== CHANNEL f1 =====  
 SFO1 376.4983660 MHz  
 NUC1 19F  
 P1 14.50 usec  
 PLW1 17.00000000 W

F2 - Processing parameters  
 SI 262144  
 SF 376.4983660 MHz  
 WDW EM  
 SSB 0  
 LB 1.00 Hz  
 GB 0  
 PC 1.00



# <sup>1</sup>H NMR

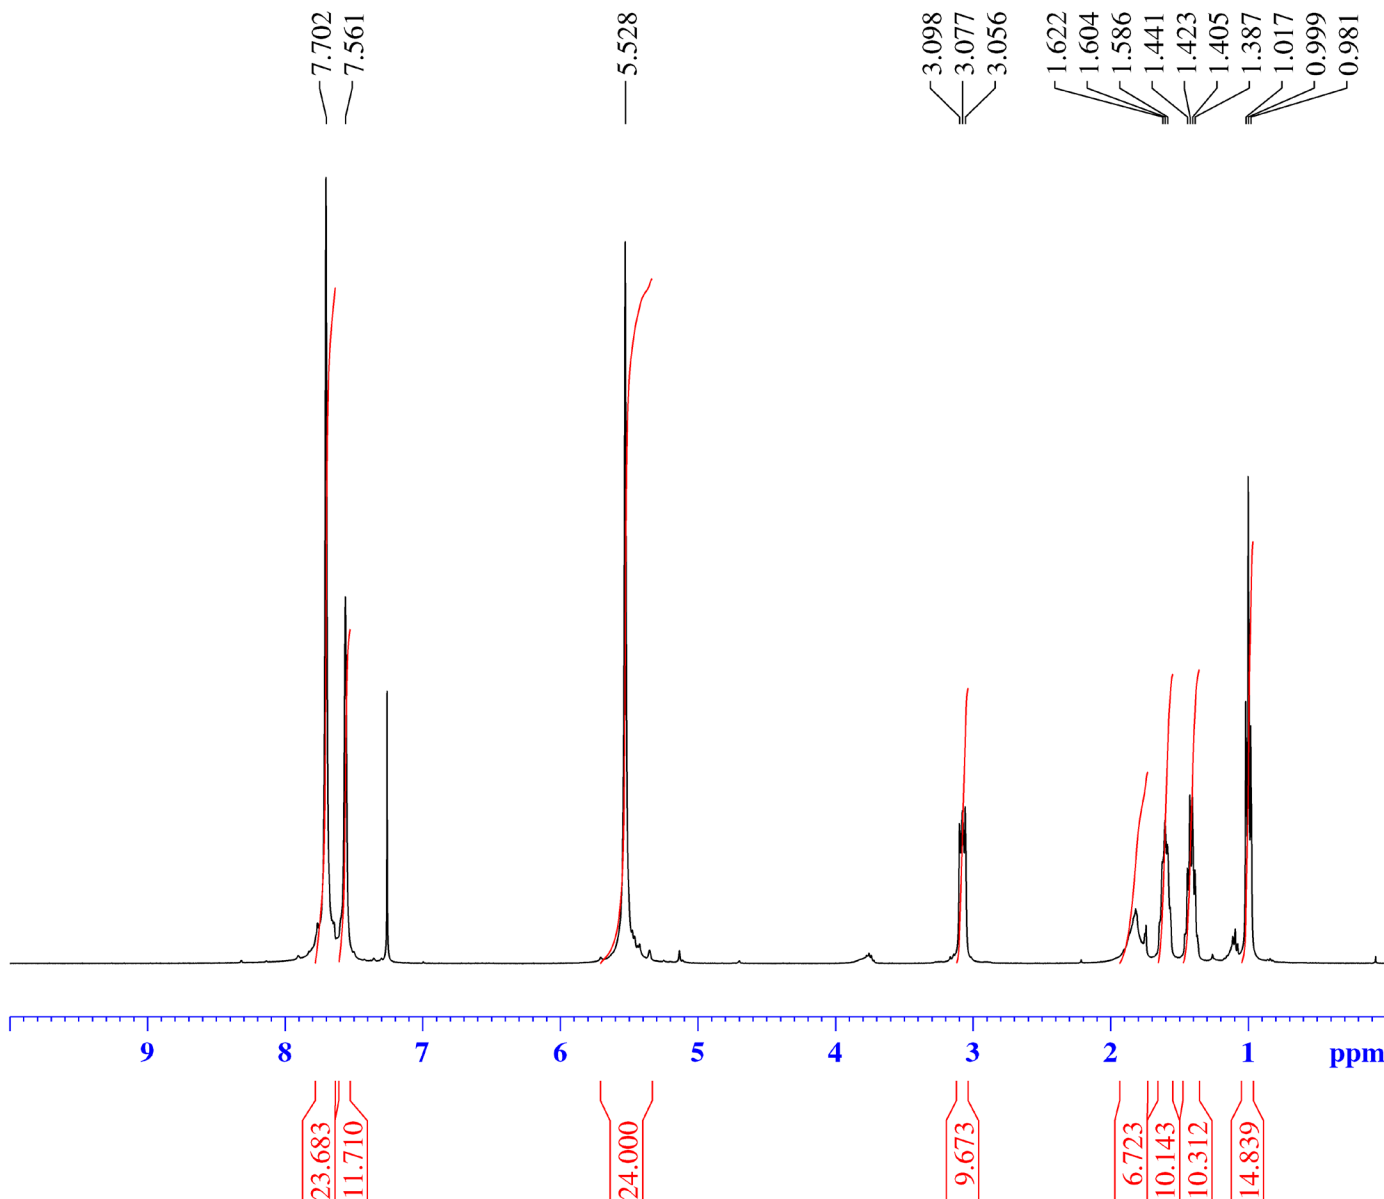

Current Data Parameters  
 NAME B12(O-3,5-bis(TFMBn))12  
 EXPNO 122  
 PROCNO 1

F2 - Acquisition Parameters  
 Date\_ 20150824  
 Time 17.32  
 INSTRUM av400  
 PROBHD 5 mm PABBO BB/  
 PULPROG zg30  
 TD 52882  
 SOLVENT CDCl3  
 NS 64  
 DS 0  
 SWH 8012.820 Hz  
 FIDRES 0.151523 Hz  
 AQ 3.2998369 sec  
 RG 155.85  
 DW 62.400 usec  
 DE 6.50 usec  
 TE 299.0 K  
 D1 2.00000000 sec  
 TD0 1

===== CHANNEL f1 =====  
 SFO1 400.1324008 MHz  
 NUC1 1H  
 P1 15.00 usec  
 PLW1 13.00000000 W

F2 - Processing parameters  
 SI 65536  
 SF 400.1300184 MHz  
 WDW EM  
 SSB 0  
 LB 0.30 Hz  
 GB 0  
 PC 1.00



# <sup>11</sup>B {<sup>1</sup>H} NMR



— -15.687

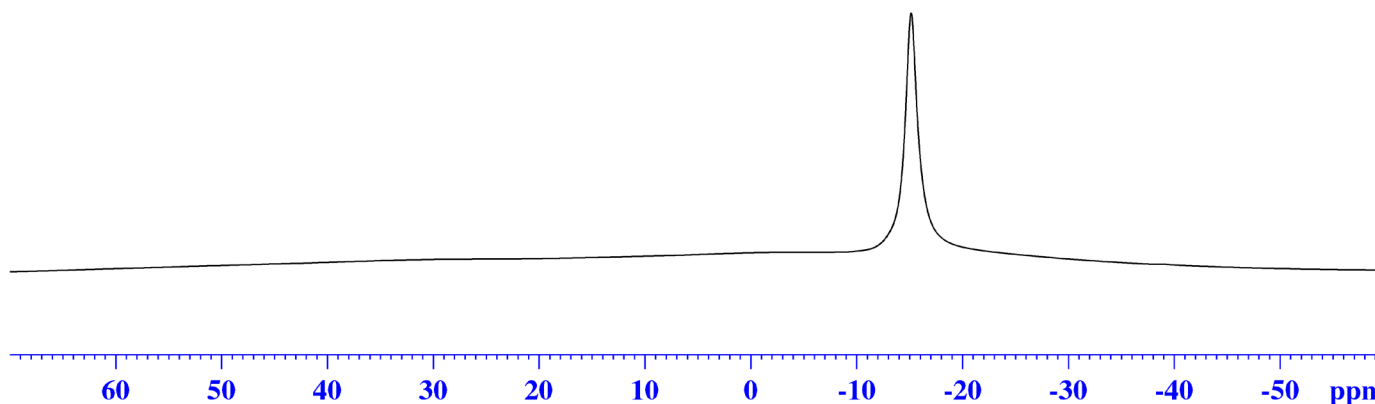

Current Data Parameters  
 NAME B12(O-3,5-bisTFMBn)12  
 EXPNO 120  
 PROCNO 1

F2 - Acquisition Parameters  
 Date\_ 20150824  
 Time 17.23  
 INSTRUM av400  
 PROBHD 5 mm PABBO BB/  
 PULPROG zgdc.js  
 TD 5096  
 SOLVENT CDCl3  
 NS 1024  
 DS 0  
 SWH 51020.406 Hz  
 FIDRES 10.011854 Hz  
 AQ 0.0499408 sec  
 RG 189.85  
 DW 9.800 usec  
 DE 6.50 usec  
 TE 299.2 K  
 D1 0.00000400 sec  
 D11 0.03000000 sec  
 TD0 1

===== CHANNEL f1 =====  
 SFO1 128.3776052 MHz  
 NUC1 11B  
 P1 10.00 usec  
 PLW1 52.00000000 W

===== CHANNEL f2 =====  
 SFO2 400.1324008 MHz  
 NUC2 1H  
 CPDPRG[2] waltz16  
 PCPD2 90.00 usec  
 PLW2 13.00000000 W  
 PLW12 0.36111000 W

F2 - Processing parameters  
 SI 32768  
 SF 128.3776050 MHz  
 WDW EM  
 SSB 0  
 LB 50.00 Hz  
 GB 0  
 PC 1.40

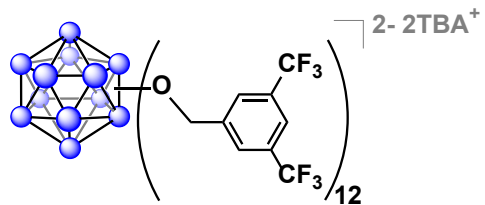

IR

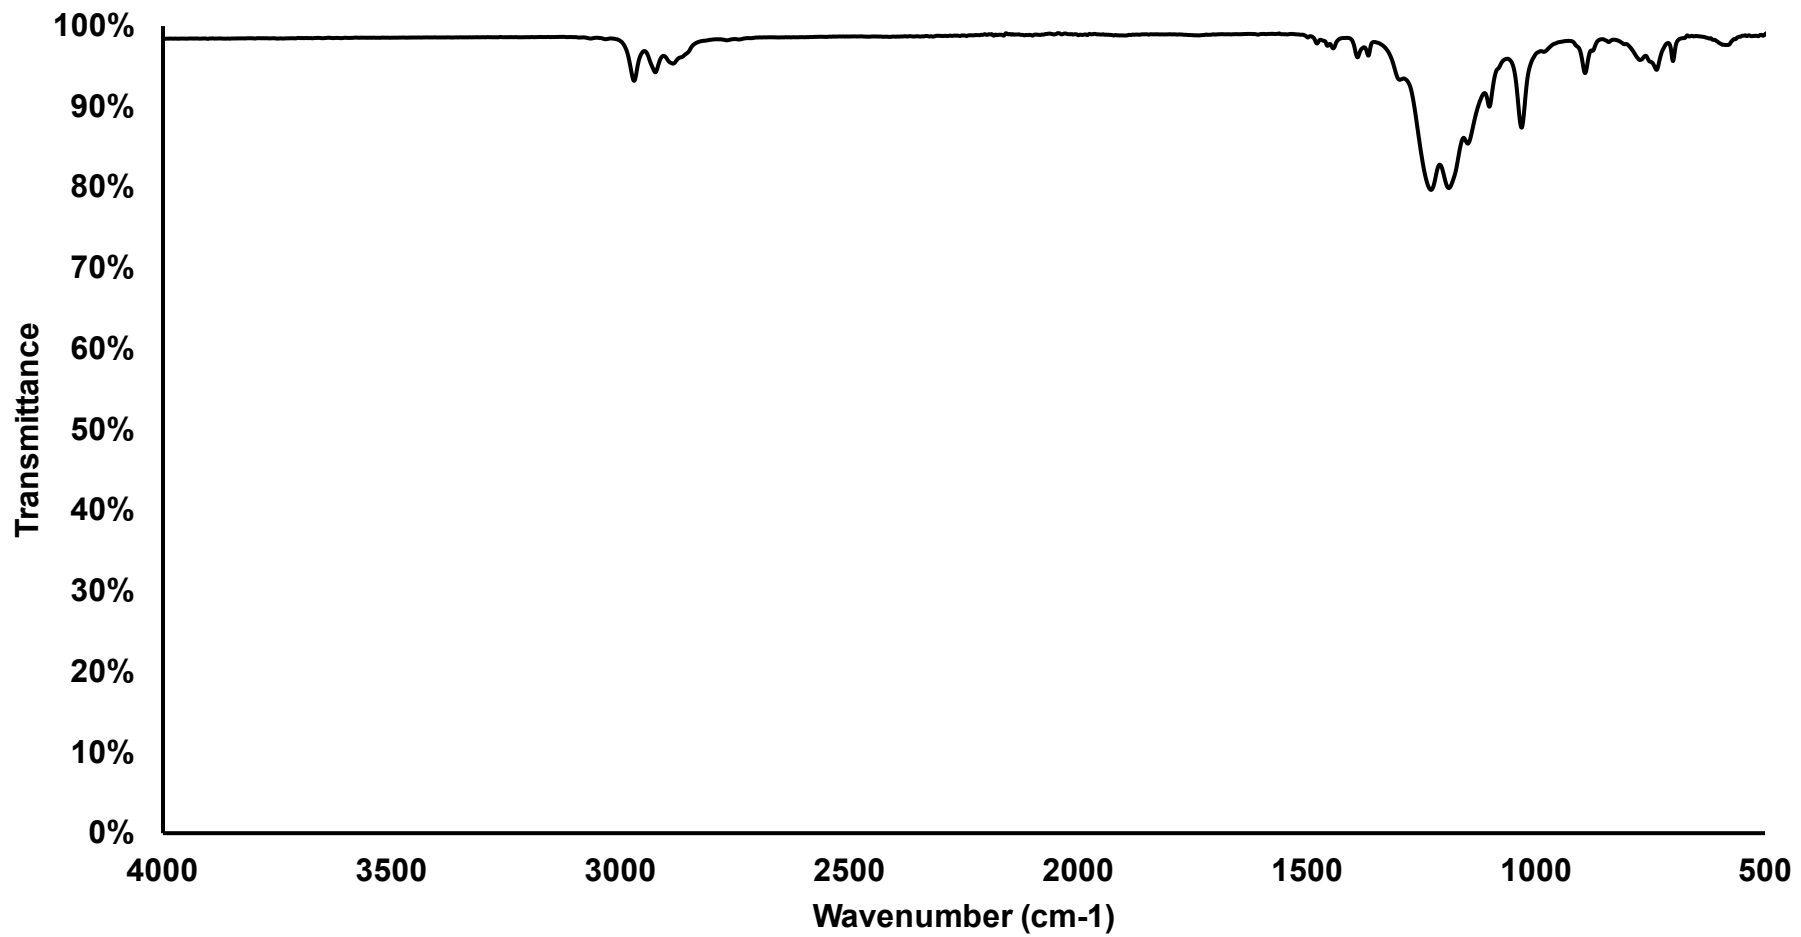

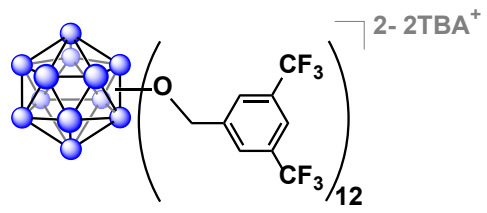

### B 1s XPS

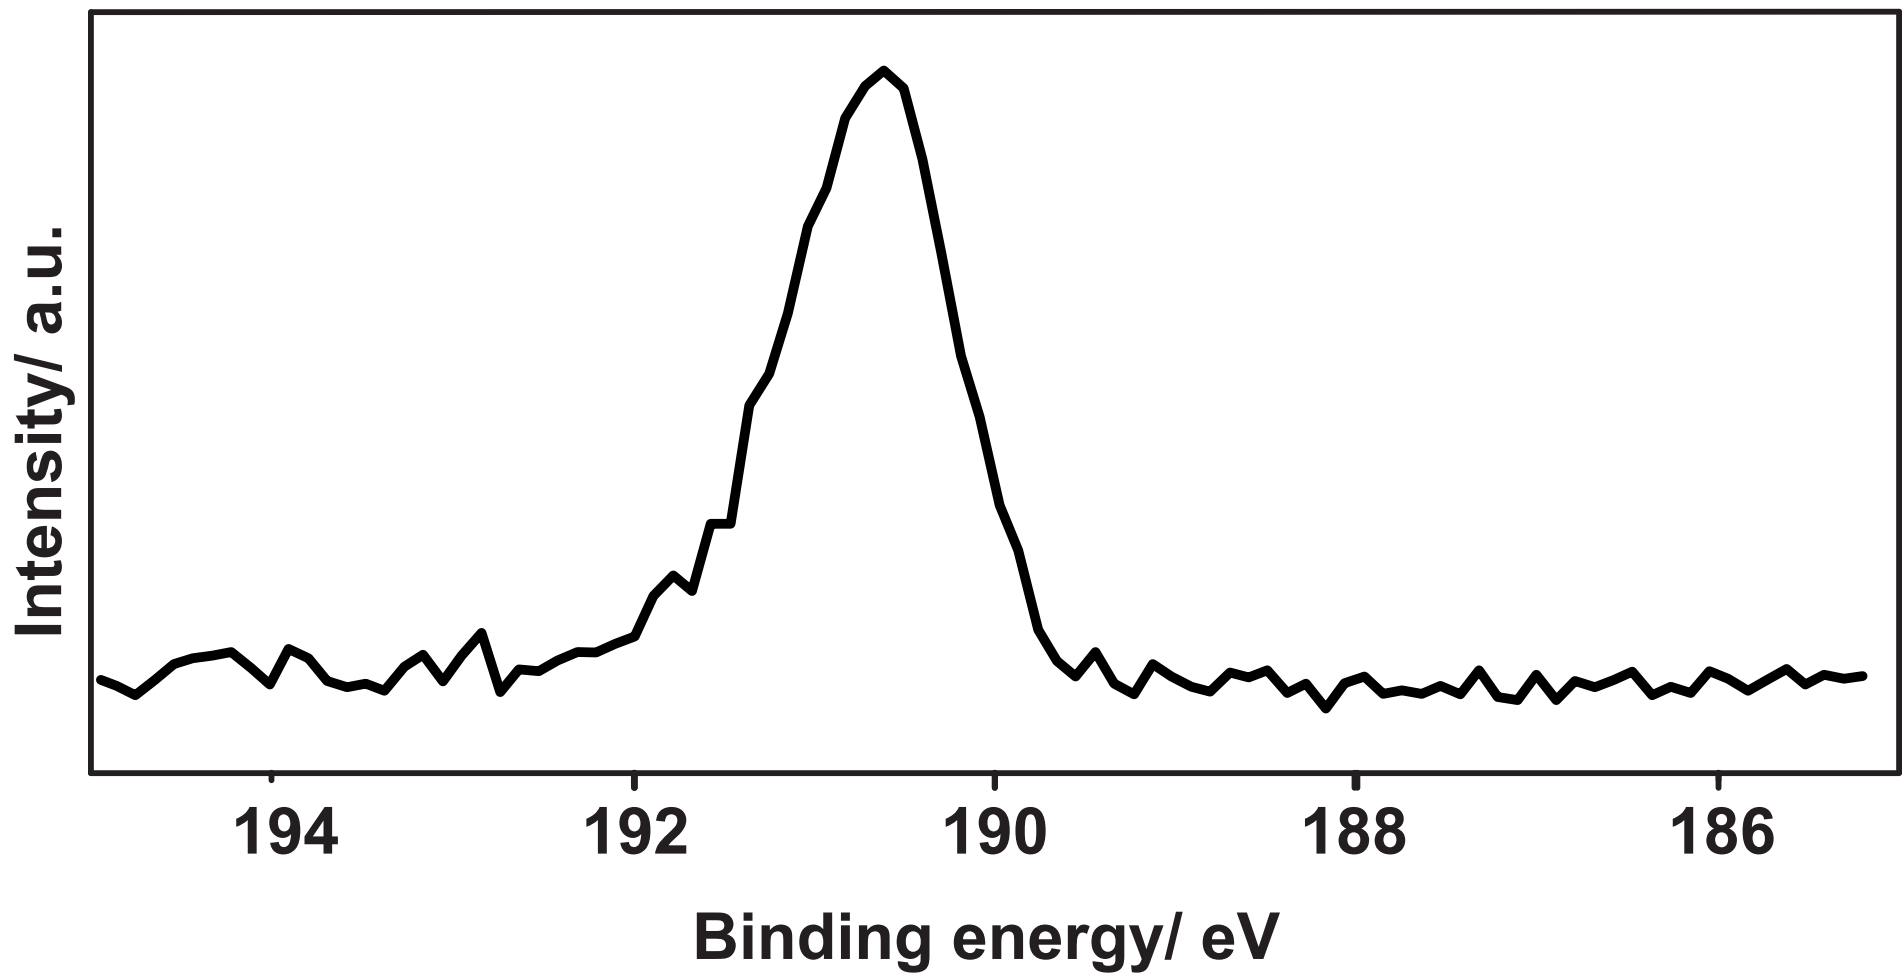



# $^{11}\text{B}$ $\{^1\text{H}\}$ NMR

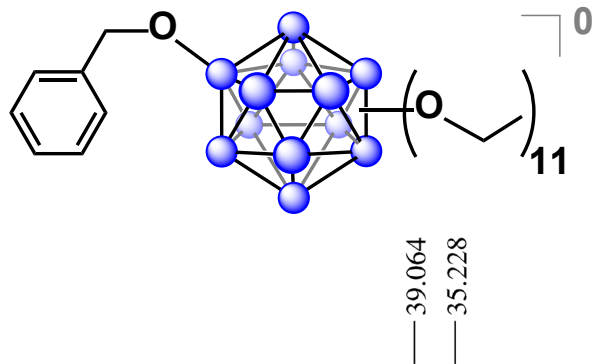

Current Data Parameters  
NAME B12(O-Bn)(O-Et)11  
EXPNO 30  
PROCNO 1

F2 - Acquisition Parameters  
Date\_ 20150517  
Time 15.01  
INSTRUM av400  
PROBHD 5 mm PABBO BB/  
PULPROG zgdc.js  
TD 5096  
SOLVENT CDCl3  
NS 1024  
DS 0  
SWH 51020.406 Hz  
FIDRES 10.011854 Hz  
AQ 0.0499408 sec  
RG 189.85  
DW 9.800 usec  
DE 6.50 usec  
TE 299.1 K  
D1 0.00000400 sec  
D11 0.03000000 sec  
TD0 1

===== CHANNEL f1 =====  
SFO1 128.3776052 MHz  
NUC1  $^{11}\text{B}$   
P1 10.00 usec  
PLW1 52.00000000 W

===== CHANNEL f2 =====  
SFO2 400.1324008 MHz  
NUC2  $^1\text{H}$   
CPDPRG[2] waltz16  
PCPD2 90.00 usec  
PLW2 13.00000000 W  
PLW12 0.36111000 W

F2 - Processing parameters  
SI 32768  
SF 128.3776050 MHz  
WDW EM  
SSB 0  
LB 50.00 Hz  
GB 0  
PC 1.40

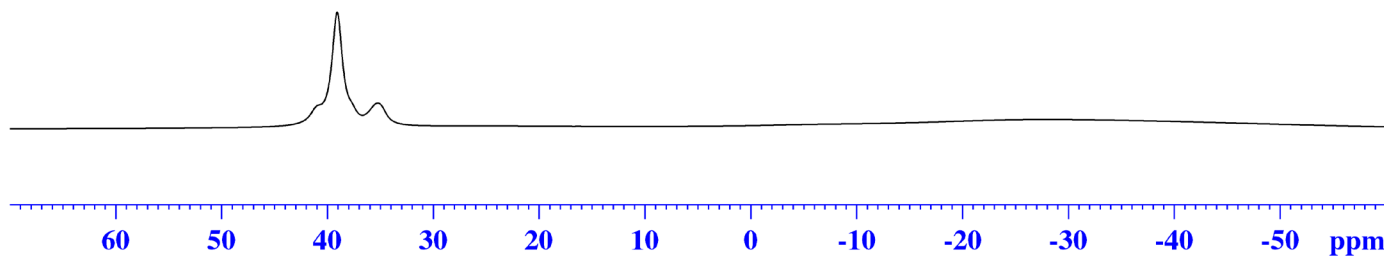

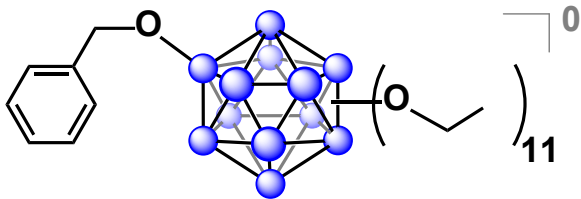

# <sup>13</sup>C NMR

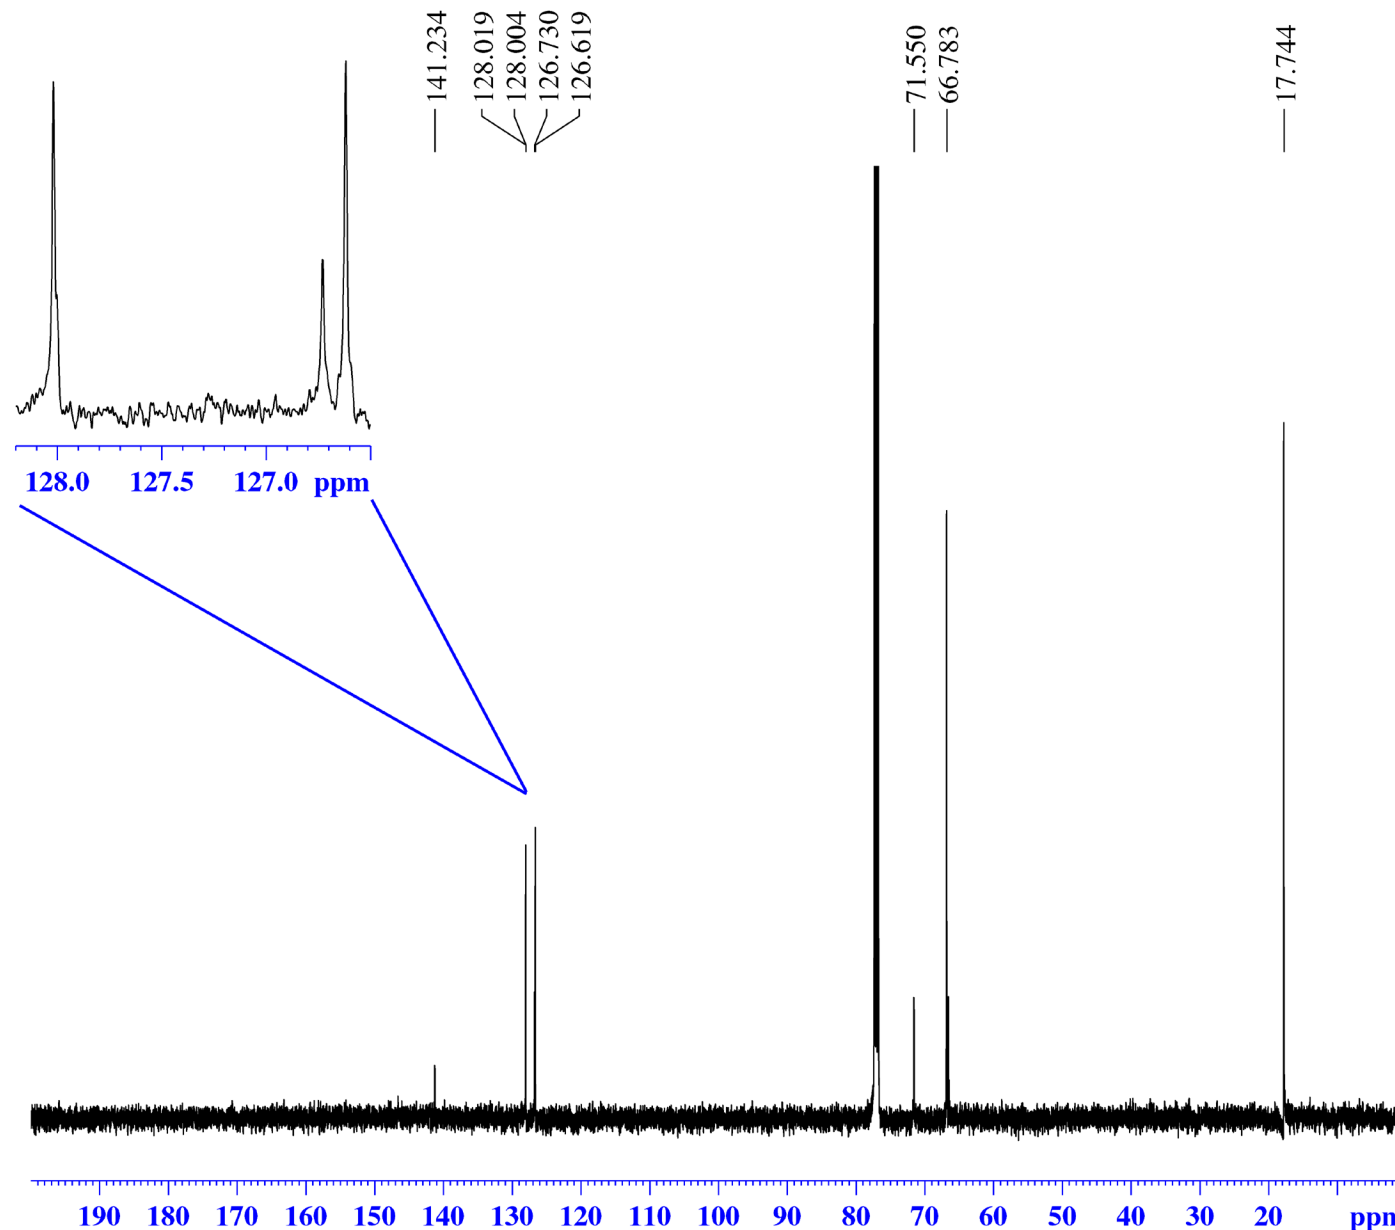

Current Data Parameters  
 NAME B12(O-Bn)(O-Et)11  
 EXPNO 2  
 PROCNO 1

F2 - Acquisition Parameters  
 Date\_ 20150517  
 Time 16.29  
 INSTRUM av500  
 PROBHD 5 mm DCH 13C-1  
 PULPROG zgpg30  
 TD 65536  
 SOLVENT CDCl3  
 NS 64  
 DS 2  
 SWH 31250.000 Hz  
 FIDRES 0.476837 Hz  
 AQ 1.0485760 sec  
 RG 13.13  
 DW 16.000 usec  
 DE 18.00 usec  
 TE 298.0 K  
 D1 2.00000000 sec  
 D11 0.03000000 sec  
 TD0 1

===== CHANNEL f1 =====  
 SFO1 125.7722511 MHz  
 NUC1 13C  
 P1 9.63 usec  
 PLW1 23.00000000 W

===== CHANNEL f2 =====  
 SFO2 500.1330008 MHz  
 NUC2 1H  
 CPDPRG[2] waltz16  
 PCPD2 80.00 usec  
 PLW2 13.50000000 W  
 PLW12 0.21094000 W  
 PLW13 0.13500001 W

F2 - Processing parameters  
 SI 131072  
 SF 125.7577892 MHz  
 WDW EM  
 SSB 0  
 LB 1.00 Hz  
 GB 0  
 PC 1.40

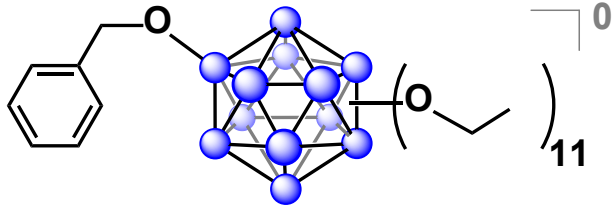

# <sup>1</sup>H NMR in C<sub>6</sub>D<sub>6</sub>

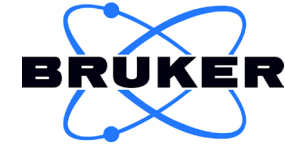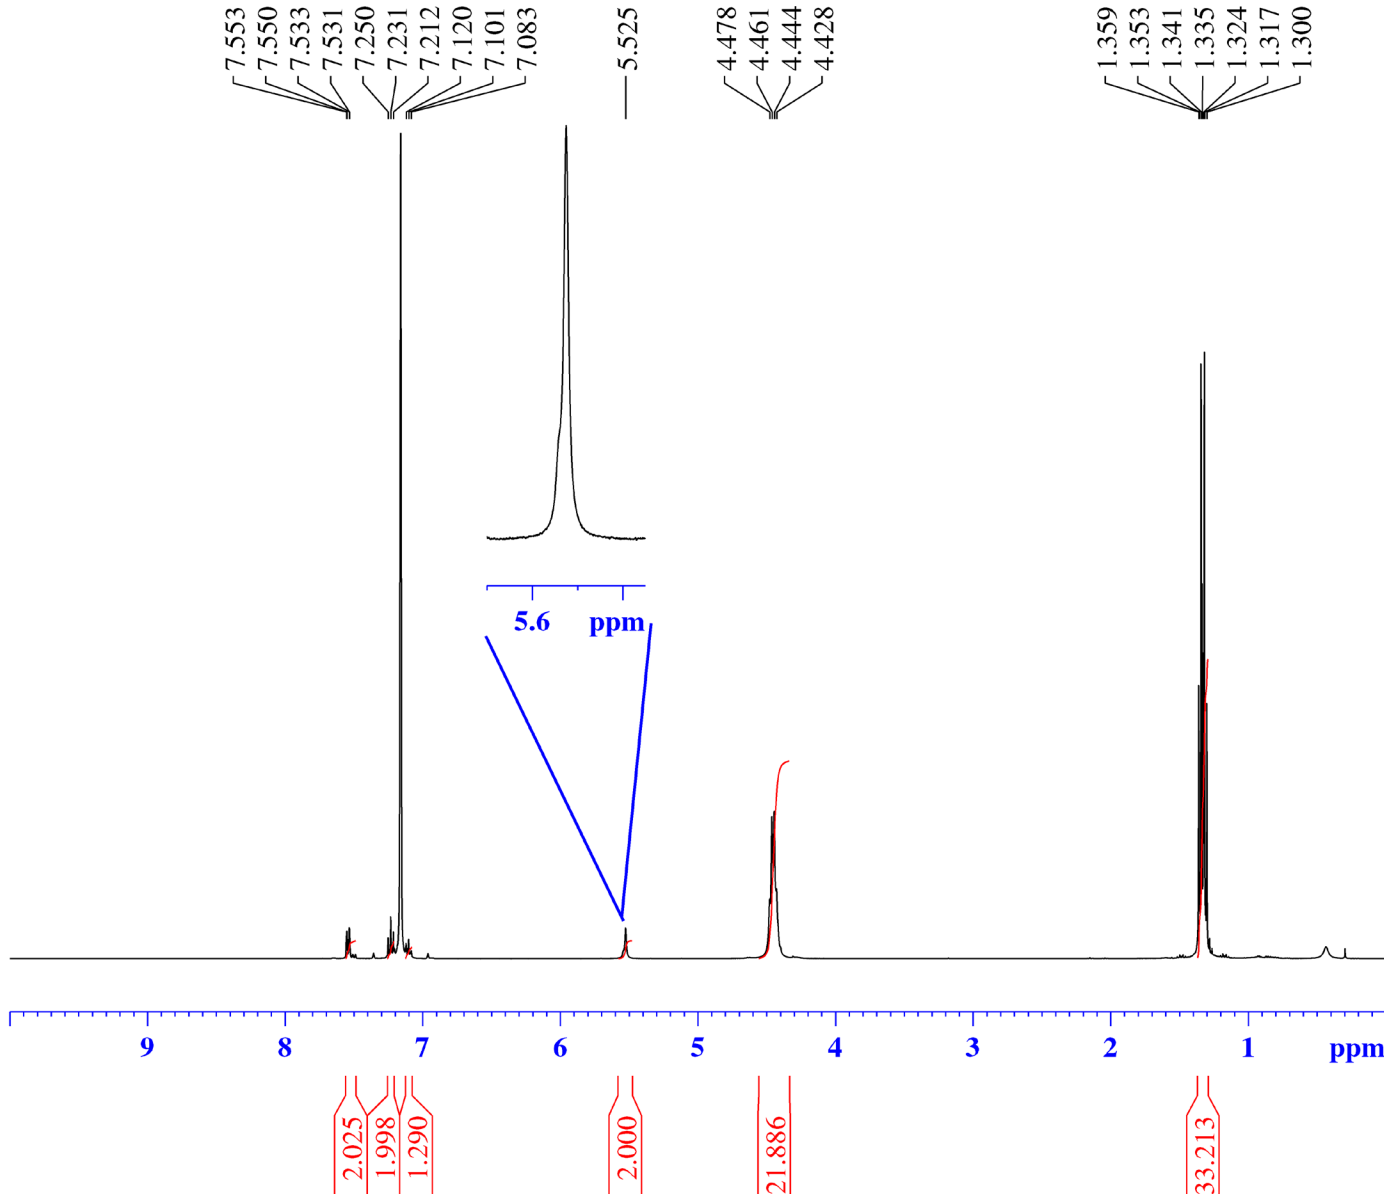

Current Data Parameters  
 NAME Jan14-2016  
 EXPNO 100  
 PROCNO 1

F2 - Acquisition Parameters  
 Date\_ 20160114  
 Time 14.59  
 INSTRUM av400  
 PROBHD 5 mm PABBO BB/  
 PULPROG zg30  
 TD 52882  
 SOLVENT C<sub>6</sub>D<sub>6</sub>  
 NS 32  
 DS 0  
 SWH 8012.820 Hz  
 FIDRES 0.151523 Hz  
 AQ 3.2998369 sec  
 RG 155.85  
 DW 62.400 usec  
 DE 6.50 usec  
 TE 299.0 K  
 D1 2.00000000 sec  
 TD0 1

===== CHANNEL f1 =====  
 SFO1 400.1324008 MHz  
 NUC1 <sup>1</sup>H  
 P1 15.00 usec  
 PLW1 13.00000000 W  
 F2 - Processing parameters  
 SI 65536  
 SF 400.1299967 MHz  
 WDW EM  
 SSB 0  
 LB 0.30 Hz  
 GB 0  
 PC 1.00

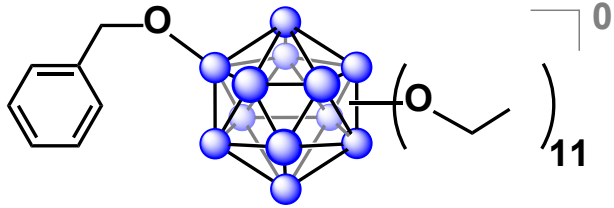

# <sup>1</sup>H NMR



7.367  
7.350  
7.332  
7.327  
7.314  
7.295  
7.277  
7.248  
7.230  
7.213

5.088  
5.055  
4.143  
4.135  
4.125  
4.117  
4.108  
4.100  
4.090  
4.082  
4.073  
4.052

1.251  
1.241  
1.234  
1.224  
1.215  
1.207  
1.197  
1.180

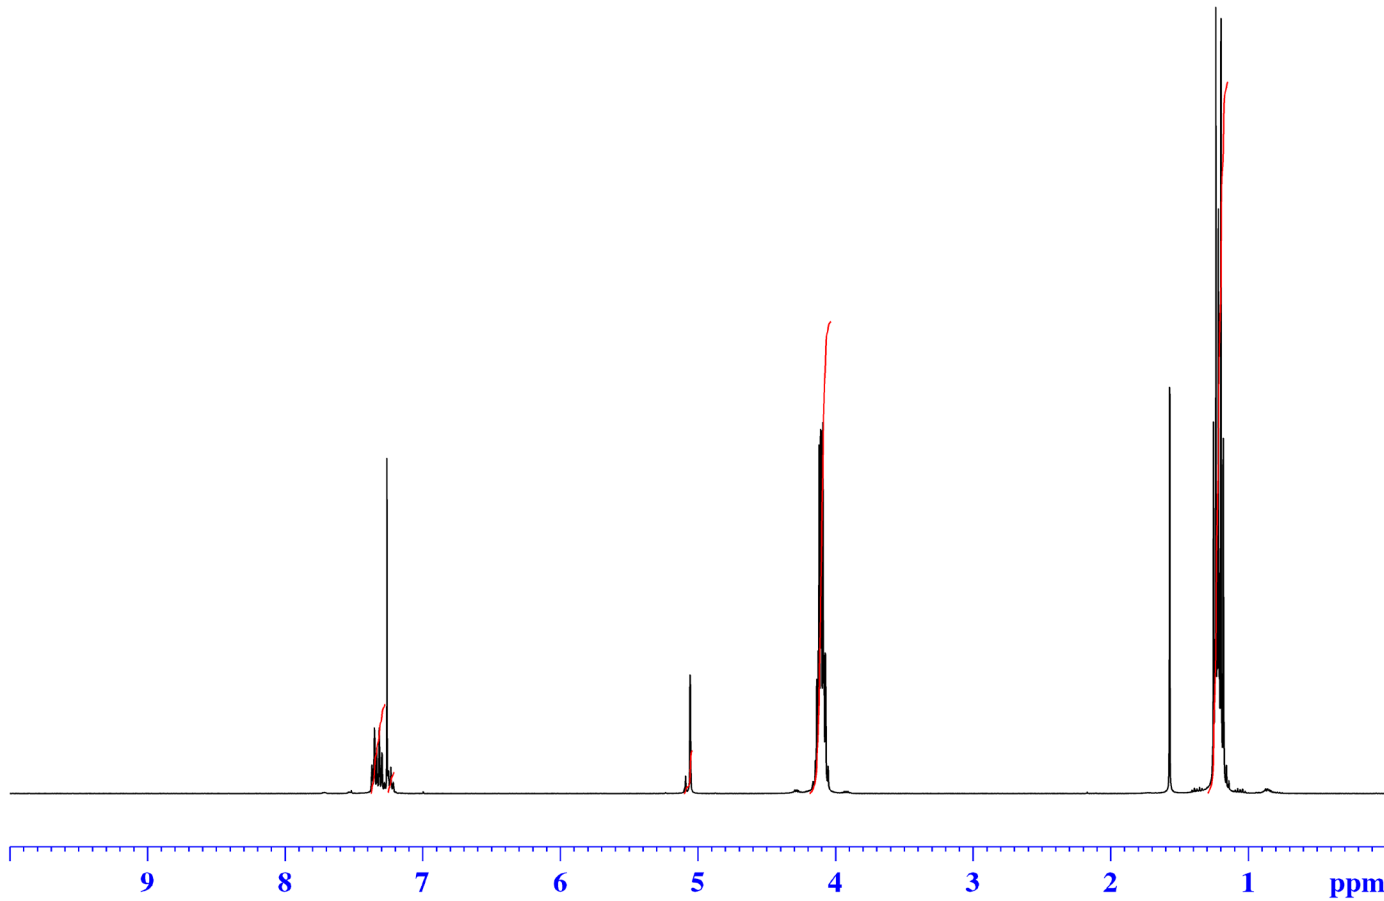

4.145  
0.992

2.000

21.936

33.066

Current Data Parameters  
NAME Jan13-2016  
EXPNO 142  
PROCNO 1

F2 - Acquisition Parameters  
Date\_ 20160113  
Time 20.50  
INSTRUM av400  
PROBHD 5 mm PABBO BB/  
PULPROG zg30  
TD 52882  
SOLVENT CDCl<sub>3</sub>  
NS 32  
DS 0  
SWH 8012.820 Hz  
FIDRES 0.151523 Hz  
AQ 3.2998369 sec  
RG 155.85  
DW 62.400 usec  
DE 6.50 usec  
TE 299.0 K  
D1 2.00000000 sec  
TD0 1

===== CHANNEL f1 =====  
SFO1 400.1324008 MHz  
NUC1 <sup>1</sup>H  
P1 15.00 usec  
PLW1 13.00000000 W

F2 - Processing parameters  
SI 65536  
SF 400.1300184 MHz  
WDW EM  
SSB 0  
LB 0.30 Hz  
GB 0  
PC 1.00

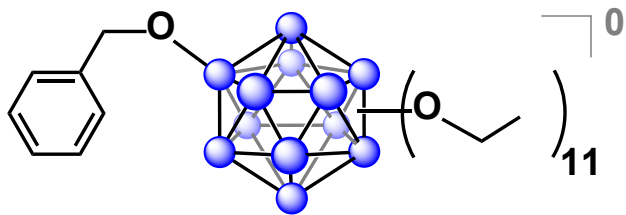

# DART High-Res Mass Spec

AW-Bn1Et11 #3-52 RT: 0.03-0.52 AV: 50 NL: 2.50E5  
T: FTMS + p NSI Full ms [70.00-1050.00]

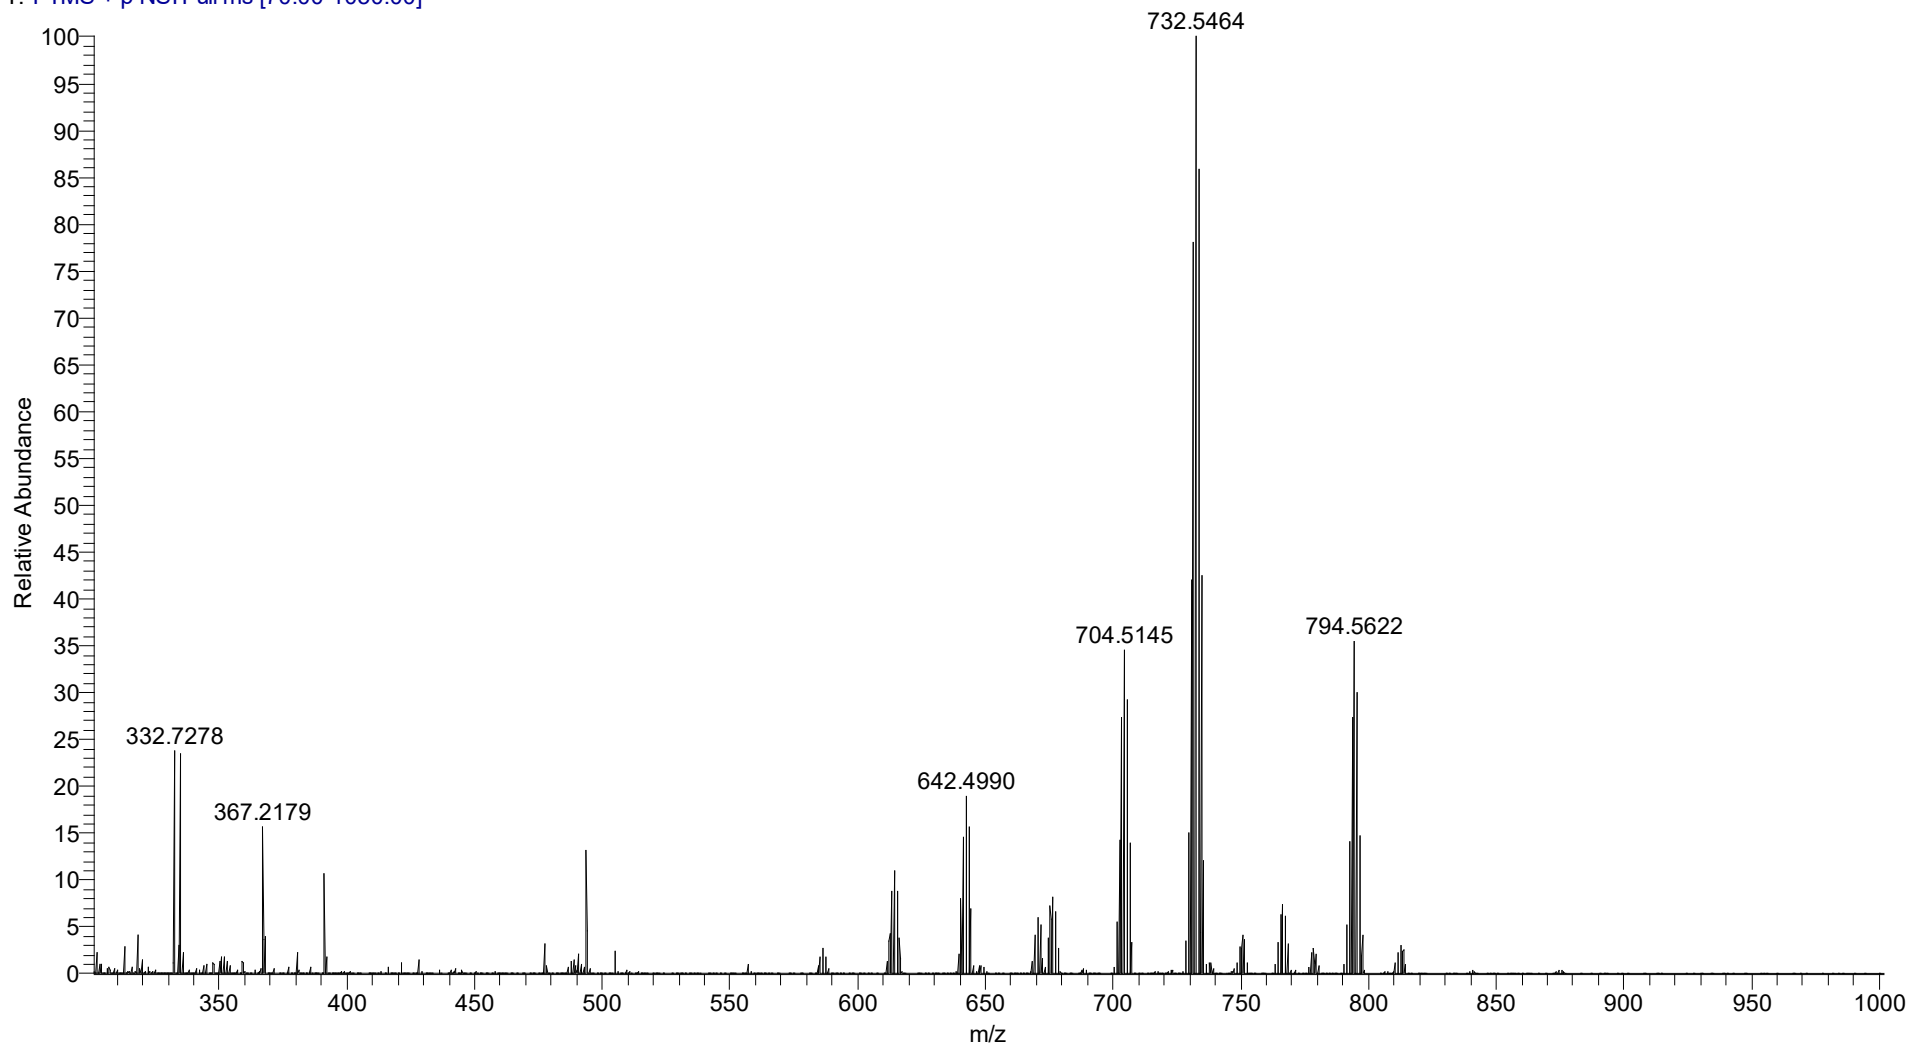

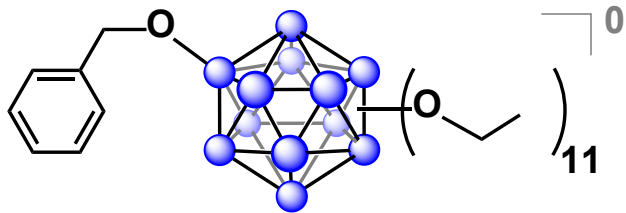

# DART High-Res Mass Spec

AW-Bn1Et11 #3-52 RT: 0.03-0.52 AV: 50 NL: 2.50E5  
T: FTMS + p NSI Full ms [70.00-1050.00]

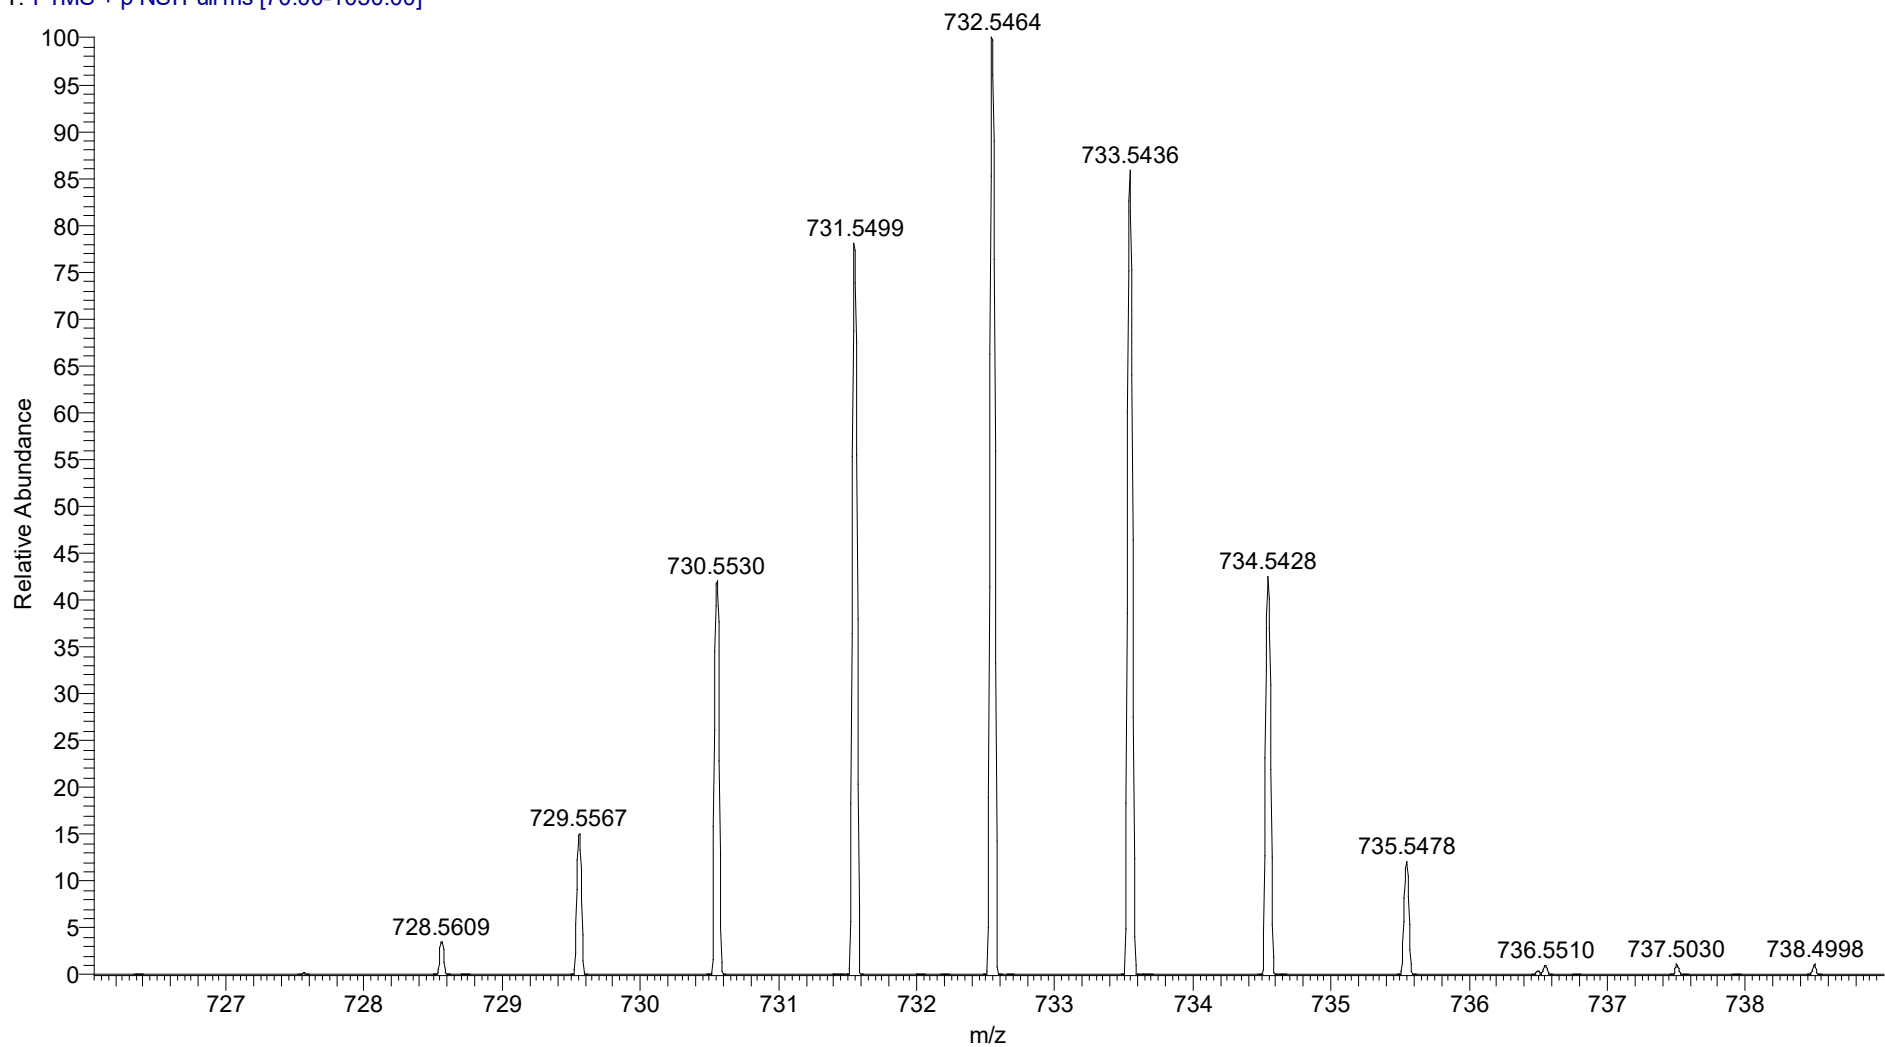

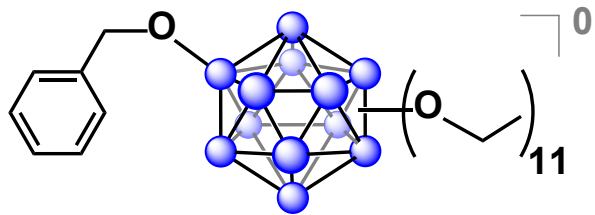

IR

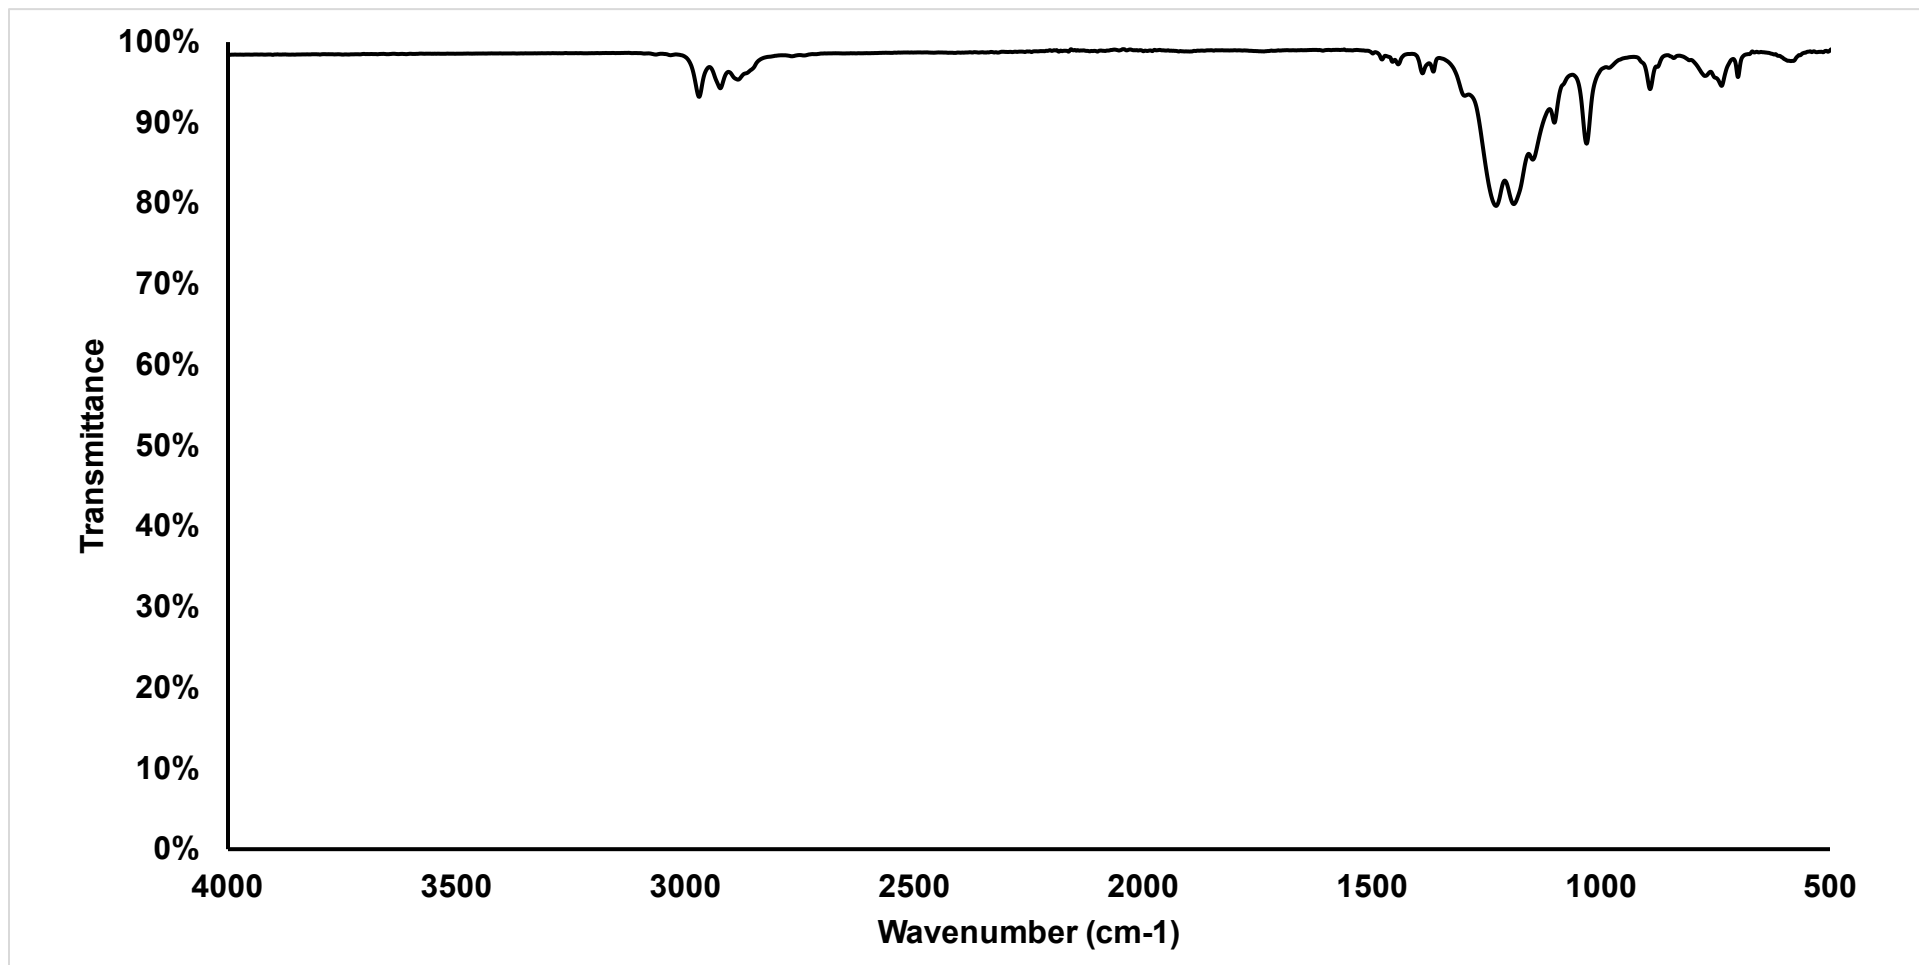

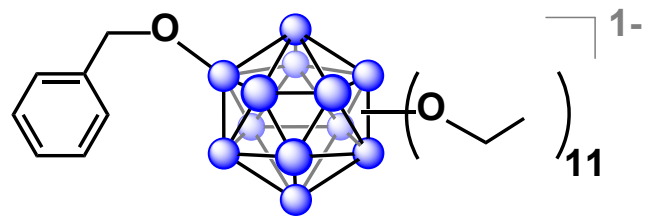

## EPR

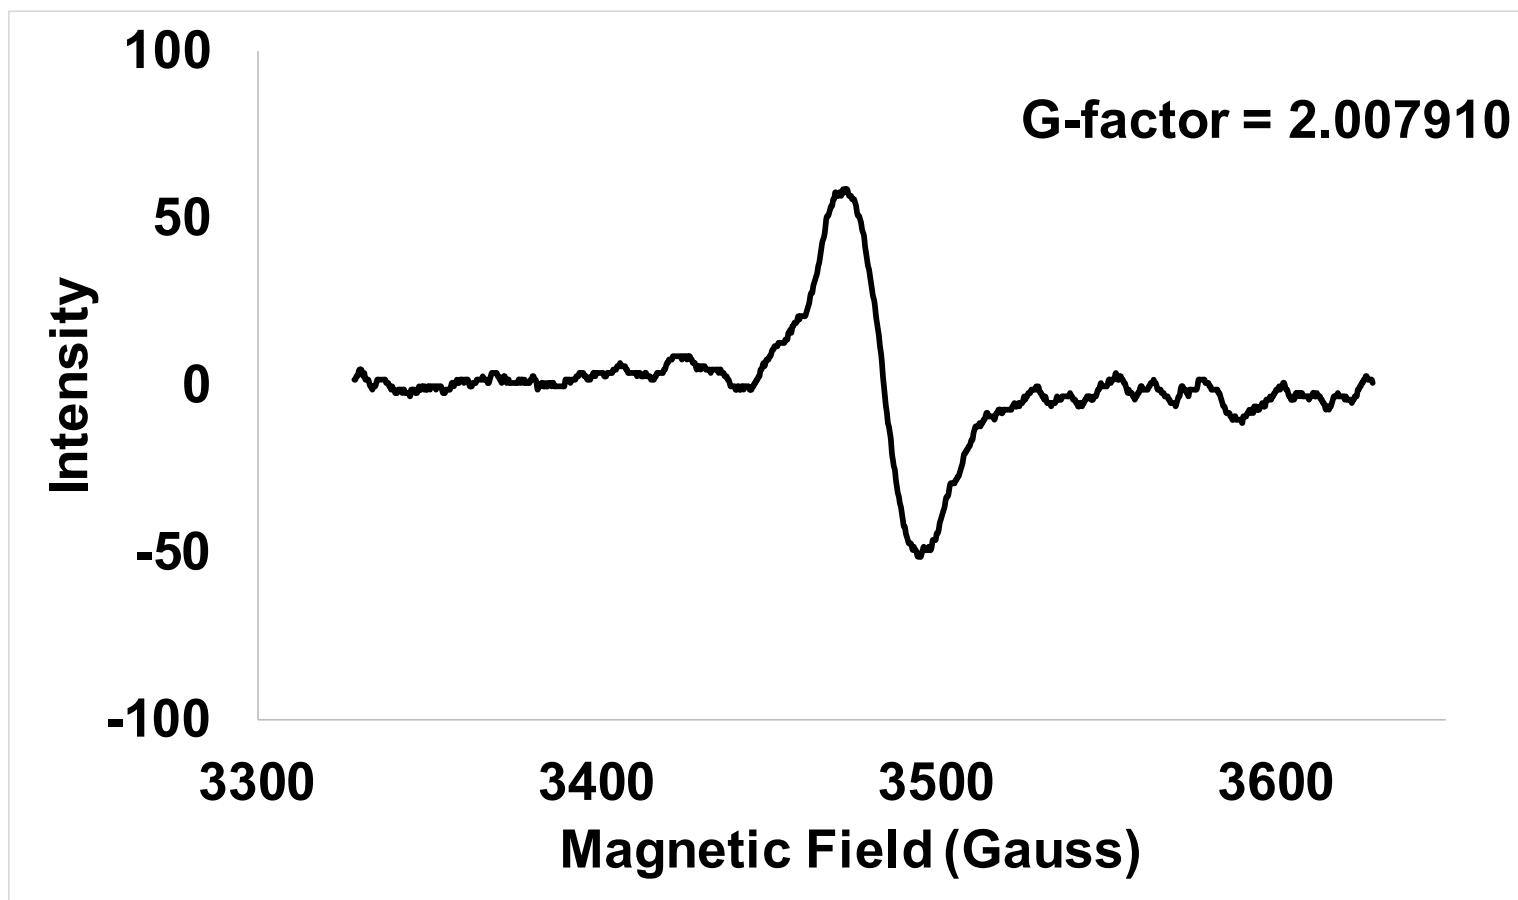

DOS Format  
 ANZ 1024  
 MIN -51.404297  
 MAX 58.595703  
 JSS 0  
 GST 3328.55  
 GSI 300  
 JUN G  
 JON Bruker BioSpin GmbH  
 JDA 11/2/2015  
 JTM 20:39  
 JRE c:\programfiles\bruker-  
 emx\syscal\st0103.cal  
 JEX field-sweep  
 JSD 1  
 HCF 3478.55  
 HSW 300  
 EMF 0  
 RCT 20.48  
 RTC 327.68  
 RRG 8.93E+03  
 RMA 4  
 MF 9.77575  
 MP 2.54E+00  
 MPD 19



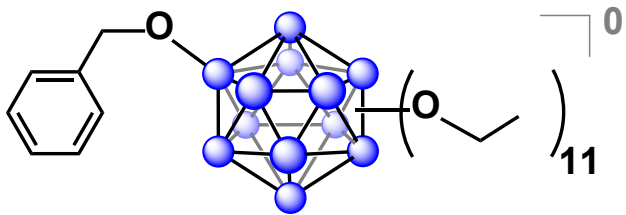

### Cyclic voltammetry

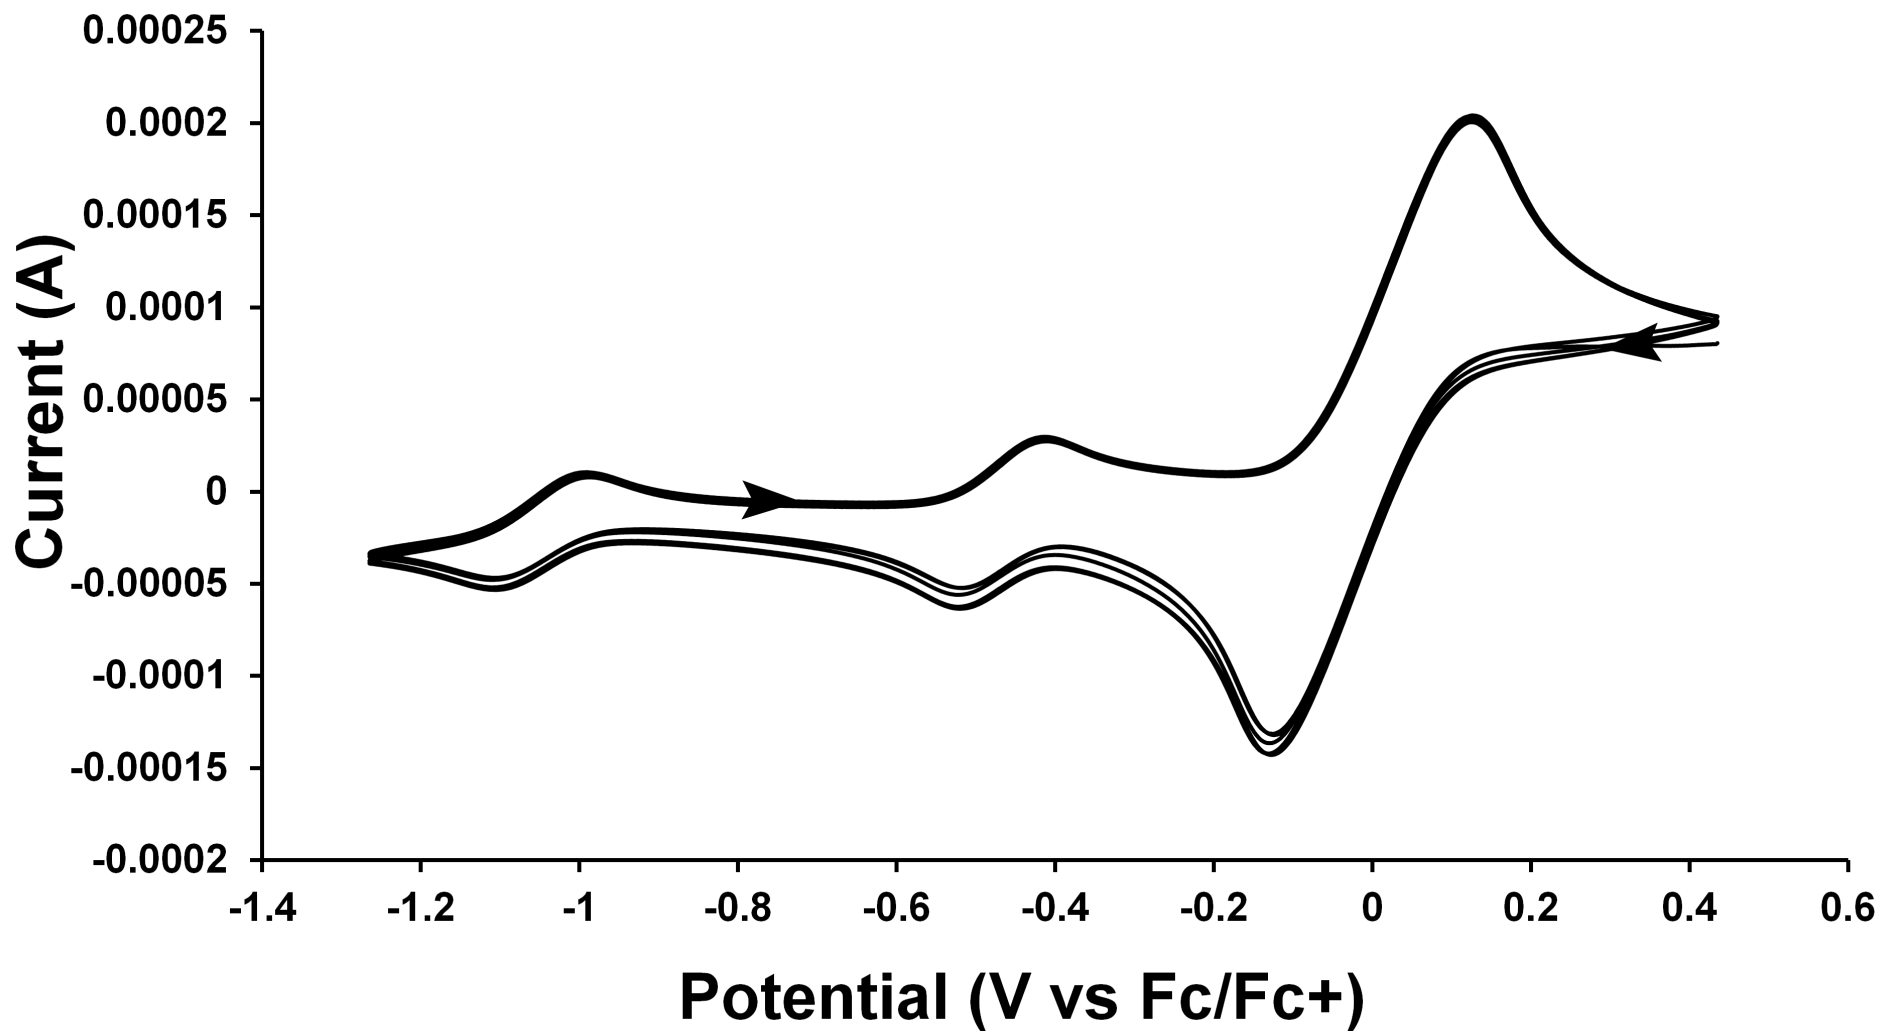

Supplement: c5qi00263j1.pdf [file c5qi00263j1.pdf]
